# Supplementary material
Source: PubMed Central journal article supplement (PMC2645818)
Supplement: M806664200_1.pdf [file M806664200_1.pdf]

## SUPPLEMENTAL INFORMATION

### Construction of plasmids used in the study

**PEC2003:** (GST) The plasmid PEC610 (*UAF30/pCBGST1*) in which yeast *UAF30* is cloned as *NcoI/KpnI* fragment into pCBGST1 was digested with *NcoI*. The *NcoI* site was filled-in with Klenow and dNTP mix and the linear plasmid was ligated. This results in the generation of a stop codon 6 base pairs (two amino acid residues) downstream of the in-frame ATG codon present in the original *NcoI* site.

**PEC2007:** (GST-proRTD1a) The proRTD1a sequence was amplified by PCR using oligonucleotides #512 and #513 and using plasmid CIC/pLNCX (from Dr. Jun Yuan, this has a mutation of residue T<sup>38</sup>A in the prosegment) as template. The PCR product was digested with *NcoI* and *Acc65I* and ligated into plasmid PEC610 previously digested with the same restriction enzymes.

**PEC2038:** (DBD-proRTD1a) The proRTD1a sequence was amplified by PCR using oligonucleotides #506 and #512 using plasmid CIC/pLNCX as template. The PCR product was digested with *NcoI* and *BamHI* and ligated into plasmid pGBKT7 (Clontech) also digested with *NcoI* and *BamHI*.

**PEC2069:** (AD-SDF2L1) This plasmid expresses the rhesus SDF2L1 as a fusion to the GAL4 activation domain produced as a result of the recombination between the amplified cDNA and linearized pGADT7-Rec plasmid. This was isolated from a yeast colony containing a putative DBD-proRTD1a interactor.

**PEC2073:** (DBD-proseg) The prosegment of proRTD1a was amplified by PCR using oligonucleotides #552 and #553 using PEC2038 as template. The PCR product was digested *EcoRI* and *BamHI* and ligated into pGBKT7 vector also digested with the same enzymes.

**PEC2075:** (GST- $\Delta$ N<sub>28</sub>SDF2L1) Oligonucleotides #556 and #557 were used to amplify  $\Delta$ N<sub>28</sub>SDF2L1 by PCR using PEC2069 DNA as template. The PCR product was digested with *BspHI* and *Acc65I* and ligated into PEC2007 DNA digested with *NcoI* and *Acc65I*.

**PEC2082:** (DBD-proHNP3) The plasmid PEC2080 (proHNP3/pCR2.1) was first digested with *Acc65I* and the site was then filled-in using Klenow and dNTPs. The plasmid was then digested with *EcoRI* and the proHNP3 containing fragment was ligated into pGBKT7 vector digested with *EcoRI* and *SmaI*.

**PEC2084:** (AD- $\Delta$ N<sub>28</sub>SDF2L1) Plasmid PEC2069 was used as a template to amplify  $\Delta$ N<sub>28</sub>SDF2L1 using oligonucleotides #536 and #556. The PCR product was digested with *EcoRI* and *XhoI* and ligated into plasmid pGADT7-Rec digested with the same enzymes.

**PEC2105:** (AD-SDF2L1 $\Delta$ MIR1) Oligonucleotides #557 and #580 were used to amplify SDF2L1- $\Delta$ MIR1 ( $\Delta$ N<sub>87</sub>-SDF2L1) using PEC2069 as template by PCR. The PCR product

was digested with *EcoRI* and *XhoI* and ligated into pGADT7-Rec digested with the same enzymes.

**PEC2106:** (AD-SDF2L1 $\Delta$ MIR3) Oligonucleotides #535 and #581 were used to amplify SDF2L1- $\Delta$ MIR3 (SDF2L1- $\Delta$ C<sub>151</sub>) using PEC2069 as template by PCR. The PCR product was digested with *EcoRI* and *XhoI* and ligated into pGADT7-Rec vector also digested with the same enzymes.

**PEC2113:** (DBD-proHBD1) The proHBD1 fragment was amplified by PCR using oligonucleotides #586 and #587 using PEC2083 (PreproHBD1/pCR2.1 Topo) as template. The PCR product was then cloned into pGBKT7 as *EcoRI* and *BamHI* fragment.

**PEC2114:** (DBD-proHD5) The proHD5 fragment was amplified by PCR using oligonucleotides #584 and #585 and plasmid PEC2109 (full length HD5 cDNA, item # IHS1380-97652042 from Open Biosystems) as template and cloned as *EcoRI* and *BamHI* fragment into pGBKT7.

**PEC2121:** (GST-proHNP3) The proHNP3 fragment was amplified using PEC2082 as template and oligonucleotides #597 and #570 by PCR. The PCR product was digested with *NcoI* and *Acc65I* and ligated into PEC610 vector also digested with the same enzymes.

**PEC2122:** (AD- $\Delta$ N<sub>28</sub>SDF2L1 $\Delta$ MIR2) Two fragments coding for the N-terminal (residues 28-94) and C-terminal (residues 150-221) were amplified by PCR using oligonucleotides #535 and #595, and #557 and #596 respectively using PEC2084 DNA as template. The oligonucleotides #595 and #596 also encoded a *BglII* site. The PCR products were digested with *BglII* and ligated. The ligated product was used as a template to amplify  $\Delta$ N<sub>28</sub>SDF2L1 $\Delta$ MIR2 by PCR using oligonucleotides #535 and #557. The resultant PCR product was digested with *EcoRI* and *XhoI* and ligated into pGADT7-Rec plasmid also digested with the same enzymes.

**PEC2123:** (DBD-proHNP3 $\Delta$ 35-49) The proHNP3 $\Delta$ 35-49 DNA was amplified by PCR using oligonucleotides # 570 and #597 and plasmid PEC2119 (proHNP3 $\Delta$ 35-49/pCR2.1 Topo) as template. The PCR product was digested with *EcoRI* and *BamHI* and the proHNP3 $\Delta$ 35-49 fragment was ligated into pGBKT7 vector also digested with the same enzymes.

**PEC2124:** (DBD-proRTD1a $\Delta$ RLL) The proRTD1a $\Delta$ RLL was amplified using oligonucleotides #512 and #547 and plasmid PEC2038 as template by PCR. The PCR product was digested using *BamHI* and *NcoI* and ligated into pGBKT7 vector also digested with the same enzymes.

**PEC2125:** (DBD-RTD1a) The oligonucleotides #548 and #549 which encode the RTD1a nonamer sequence were annealed by first boiling in water bath and allowing it to cool to

room temperature. The product was then ligated into pGBKT7 vector digested with *EcoRI* and *BamHI*.

**PEC2126:** (DBD-HNP3) The mature HNP3 sequence was amplified by PCR using oligonucleotides #588 and #597 and PEC2080 as template. The PCR product was digested with *EcoRI* and *XhoI* and then ligated into pGBKT7 vector also digested with *EcoRI* and *XhoI*.

**PEC2127:** (AD-MIR3) Oligonucleotides #557 and #600 were used to amplify the C-terminal domain of SDF2L1 (residues 151 to 221) by PCR using PEC2069 as template. The PCR product was digested with *EcoRI* and *XhoI* and ligated into PEC2084 (pGADT7-Rec) plasmid also digested with the same enzymes.

**List of primers:**

#506: 5'-GCGGATCCTTATAACAAACGGCAGAATCC  
#512: 5'-GCCCATGGAGGCACGTCAGGCACGTGCTGATG  
#513: 5'-GCGGTACCGCGGCCGCTTATAACAAACGGCAGAATCCGCGTGTGCAAATGC  
ACCGC  
#535: 5'-CTATTCGATGATGAAGATACCCACCAAACCC  
#536: 5'-GTGAACTTGCGGGGTTTTTCAGTATCTACG  
#547: 5'-GCGGATCCTTAGCAGAATCCTCGTGTGC  
#548: 5'-AATTCAGGTGCATTTGCACACGAGGATTCTGCTAAG  
#549: 5'-GATCCTTAGCAGAATCCTCGTGTGCAAATGCACCTG  
#552: 5'-GCGAATTCGAGGCACGTCAGGCAAGAGC  
#553: 5'-GCGGATCCTACAAGCCTTTCGCTGACTCTG  
#556: 5'-GTCATGAGCGAATTCGCCAAGACTGGCGCGGGGCTCG  
#557: 5'- GCGTCGACTCGAGGTACCTCAGAGTTCATCGTGACCTGC  
#570: 5'-GCCCATGGAATTCGAGCCACTCCAGGCAAGAGCTG  
#580: 5'-GTCATGAGCGAATTCTCGGAAGGCGGGTGCCCGCGTGGG  
#581: 5'-GCGTCGACTCGAGGTACCTAAGAGCAGCGCACTGTCCATAG  
#584: 5'-GCCCATGGGAGAATTCGAGTCACTCCAGGAAAGAGC  
#585: 5'-GCGGATCCGGTACCTCGAGTCAGCGACAGCAGAGTCTGTAG  
#586: 5'- GCCCATGGGAGAATTCGGTAACTTTCTCACAGGCC  
#587: 5'-GCGGATCCGGTACCTCGAGTCACTTGCAGCACTTGGCC  
#588: 5'-GCGAATTCGACTGCTATTGCAGAATACC  
#597: 5'-GCGGATCCGGTACCTCGAGTCAGCAGCAGAATGCCAGAGTC  
#600: 5'-GCCCATGGAATTCGGACAGCACTGGGAGCGTGAG

---

**Homology modeling of SDF2L1:** The structure of the *C. elegans* protein, 1t9f.PDB was used for homology modeling of SDF2L1 using SWISS-MODEL. The pdb\_extract program available at <http://deposit.rcsb.org> was then used to display the co-ordinates of the modeled structure from the PDB file created by SWISS-MODEL.

```

data_UNNAMED
#
loop_
_atom_site.group_PDB
_atom_site.id
_atom_site.auth_atom_id
_atom_site.label_atom_id
_atom_site.label_alt_id
_atom_site.auth_comp_id
_atom_site.label_comp_id
_atom_site.auth_asym_id
_atom_site.label_asym_id
_atom_site.auth_seq_id
_atom_site.label_seq_id
_atom_site.pdbx_PDB_ins_code
_atom_site.Cartn_x
_atom_site.Cartn_y
_atom_site.Cartn_z
_atom_site.occupancy
_atom_site.B_iso_or_equiv
_atom_site.pdbx_PDB_model_num
ATOM 1 N N . LYS LYS . . 5 5 . 4.336 39.813 -22.052 1.00 50.00 .
ATOM 2 CA CA . LYS LYS . . 5 5 . 4.299 38.539 -21.301 1.00 50.00 .
ATOM 3 C C . LYS LYS . . 5 5 . 4.750 37.370 -22.197 1.00 50.00 .
ATOM 4 O O . LYS LYS . . 5 5 . 3.957 36.540 -22.647 1.00 50.00 .
ATOM 5 CB CB . LYS LYS . . 5 5 . 2.875 38.261 -20.799 1.00 50.00 .
ATOM 6 CG CG . LYS LYS . . 5 5 . 2.287 39.378 -19.941 1.00 50.00 .
ATOM 7 CD CD . LYS LYS . . 5 5 . 0.856 39.019 -19.532 1.00 50.00 .
ATOM 8 CE CE . LYS LYS . . 5 5 . 0.338 40.013 -18.489 1.00 50.00 .
ATOM 9 NZ NZ . LYS LYS . . 5 5 . -0.830 39.485 -17.770 1.00 50.00 .
ATOM 10 N N . THR THR . . 6 6 . 6.054 37.339 -22.472 1.00 50.00 .
ATOM 11 CA CA . THR THR . . 6 6 . 6.654 36.306 -23.346 1.00 50.00 .
ATOM 12 C C . THR THR . . 6 6 . 6.165 34.924 -22.897 1.00 50.00 .
ATOM 13 O O . THR THR . . 6 6 . 6.216 34.614 -21.707 1.00 50.00 .
ATOM 14 CB CB . THR THR . . 6 6 . 8.188 36.339 -23.278 1.00 50.00 .
ATOM 15 OG1 OG1 . THR THR . . 6 6 . 8.616 36.094 -21.935 1.00 50.00 .
ATOM 16 CG2 CG2 . THR THR . . 6 6 . 8.749 37.667 -23.797 1.00 50.00 .
ATOM 17 N N . GLY GLY . . 7 7 . 5.707 34.130 -23.868 1.00 50.00 .
ATOM 18 CA CA . GLY GLY . . 7 7 . 5.174 32.777 -23.594 1.00 50.00 .
ATOM 19 C C . GLY GLY . . 7 7 . 6.253 31.778 -23.138 1.00 50.00 .
ATOM 20 O O . GLY GLY . . 7 7 . 6.004 30.584 -23.034 1.00 50.00 .
ATOM 21 N N . ALA ALA . . 8 8 . 7.447 32.298 -22.863 1.00 50.00 .
ATOM 22 CA CA . ALA ALA . . 8 8 . 8.611 31.518 -22.416 1.00 50.00 .
ATOM 23 C C . ALA ALA . . 8 8 . 9.242 32.098 -21.137 1.00 50.00 .
ATOM 24 O O . ALA ALA . . 8 8 . 10.401 31.844 -20.819 1.00 50.00 .
ATOM 25 CB CB . ALA ALA . . 8 8 . 9.617 31.470 -23.572 1.00 50.00 .
ATOM 26 N N . GLU GLU . . 9 9 . 8.419 32.768 -20.333 1.00 50.00 .
ATOM 27 CA CA . GLU GLU . . 9 9 . 8.857 33.302 -19.024 1.00 50.00 .
ATOM 28 C C . GLU GLU . . 9 9 . 8.452 32.363 -17.874 1.00 50.00 .
ATOM 29 O O . GLU GLU . . 9 9 . 7.999 32.765 -16.802 1.00 50.00 .
ATOM 30 CB CB . GLU GLU . . 9 9 . 8.314 34.718 -18.822 1.00 50.00 .

```

|      |    |     |     |   |     |     |   |    |    |   |        |        |         |      |       |   |
|------|----|-----|-----|---|-----|-----|---|----|----|---|--------|--------|---------|------|-------|---|
| ATOM | 31 | CG  | CG  | . | GLU | GLU | . | 9  | 9  | . | 6.786  | 34.757 | -18.832 | 1.00 | 50.00 | . |
| ATOM | 32 | CD  | CD  | . | GLU | GLU | . | 9  | 9  | . | 6.319  | 36.182 | -18.611 | 1.00 | 50.00 | . |
| ATOM | 33 | OE1 | OE1 | . | GLU | GLU | . | 9  | 9  | . | 6.521  | 37.014 | -19.526 | 1.00 | 50.00 | . |
| ATOM | 34 | OE2 | OE2 | . | GLU | GLU | . | 9  | 9  | . | 5.851  | 36.409 | -17.488 | 1.00 | 50.00 | . |
| ATOM | 35 | N   | N   | . | LEU | LEU | . | 10 | 10 | . | 8.484  | 31.083 | -18.211 | 1.00 | 50.00 | . |
| ATOM | 36 | CA  | CA  | . | LEU | LEU | . | 10 | 10 | . | 8.123  | 29.997 | -17.299 | 1.00 | 50.00 | . |
| ATOM | 37 | C   | C   | . | LEU | LEU | . | 10 | 10 | . | 8.991  | 29.932 | -16.059 | 1.00 | 50.00 | . |
| ATOM | 38 | O   | O   | . | LEU | LEU | . | 10 | 10 | . | 10.160 | 30.303 | -16.069 | 1.00 | 50.00 | . |
| ATOM | 39 | CB  | CB  | . | LEU | LEU | . | 10 | 10 | . | 8.241  | 28.658 | -18.024 | 1.00 | 50.00 | . |
| ATOM | 40 | CG  | CG  | . | LEU | LEU | . | 10 | 10 | . | 7.269  | 28.595 | -19.188 | 1.00 | 50.00 | . |
| ATOM | 41 | CD1 | CD1 | . | LEU | LEU | . | 10 | 10 | . | 7.436  | 27.269 | -19.920 | 1.00 | 50.00 | . |
| ATOM | 42 | CD2 | CD2 | . | LEU | LEU | . | 10 | 10 | . | 5.874  | 28.797 | -18.631 | 1.00 | 50.00 | . |
| ATOM | 43 | N   | N   | . | VAL | VAL | . | 11 | 11 | . | 8.355  | 29.435 | -15.018 | 1.00 | 50.00 | . |
| ATOM | 44 | CA  | CA  | . | VAL | VAL | . | 11 | 11 | . | 9.020  | 29.119 | -13.758 | 1.00 | 50.00 | . |
| ATOM | 45 | C   | C   | . | VAL | VAL | . | 11 | 11 | . | 9.818  | 27.822 | -13.987 | 1.00 | 50.00 | . |
| ATOM | 46 | O   | O   | . | VAL | VAL | . | 11 | 11 | . | 9.336  | 26.867 | -14.597 | 1.00 | 50.00 | . |
| ATOM | 47 | CB  | CB  | . | VAL | VAL | . | 11 | 11 | . | 7.947  | 28.960 | -12.678 | 1.00 | 50.00 | . |
| ATOM | 48 | CG1 | CG1 | . | VAL | VAL | . | 11 | 11 | . | 8.652  | 28.793 | -11.353 | 1.00 | 50.00 | . |
| ATOM | 49 | CG2 | CG2 | . | VAL | VAL | . | 11 | 11 | . | 7.039  | 30.186 | -12.533 | 1.00 | 50.00 | . |
| ATOM | 50 | N   | N   | . | THR | THR | . | 12 | 12 | . | 11.032 | 27.808 | -13.457 | 1.00 | 50.00 | . |
| ATOM | 51 | CA  | CA  | . | THR | THR | . | 12 | 12 | . | 11.964 | 26.691 | -13.687 | 1.00 | 50.00 | . |
| ATOM | 52 | C   | C   | . | THR | THR | . | 12 | 12 | . | 12.297 | 25.966 | -12.379 | 1.00 | 50.00 | . |
| ATOM | 53 | O   | O   | . | THR | THR | . | 12 | 12 | . | 12.201 | 26.519 | -11.289 | 1.00 | 50.00 | . |
| ATOM | 54 | CB  | CB  | . | THR | THR | . | 12 | 12 | . | 13.249 | 27.176 | -14.371 | 1.00 | 50.00 | . |
| ATOM | 55 | OG1 | OG1 | . | THR | THR | . | 12 | 12 | . | 13.946 | 28.081 | -13.510 | 1.00 | 50.00 | . |
| ATOM | 56 | CG2 | CG2 | . | THR | THR | . | 12 | 12 | . | 12.957 | 27.827 | -15.730 | 1.00 | 50.00 | . |
| ATOM | 57 | N   | N   | . | CYS | CYS | . | 13 | 13 | . | 12.631 | 24.692 | -12.505 | 1.00 | 50.00 | . |
| ATOM | 58 | CA  | CA  | . | CYS | CYS | . | 13 | 13 | . | 12.985 | 23.845 | -11.356 | 1.00 | 50.00 | . |
| ATOM | 59 | C   | C   | . | CYS | CYS | . | 13 | 13 | . | 14.277 | 24.360 | -10.711 | 1.00 | 50.00 | . |
| ATOM | 60 | O   | O   | . | CYS | CYS | . | 13 | 13 | . | 15.210 | 24.774 | -11.403 | 1.00 | 50.00 | . |
| ATOM | 61 | CB  | CB  | . | CYS | CYS | . | 13 | 13 | . | 13.201 | 22.412 | -11.828 | 1.00 | 50.00 | . |
| ATOM | 62 | SG  | SG  | . | CYS | CYS | . | 13 | 13 | . | 12.736 | 21.208 | -10.535 | 1.00 | 50.00 | . |
| ATOM | 63 | N   | N   | . | GLY | GLY | . | 14 | 14 | . | 14.264 | 24.340 | -9.377  | 1.00 | 50.00 | . |
| ATOM | 64 | CA  | CA  | . | GLY | GLY | . | 14 | 14 | . | 15.394 | 24.823 | -8.562  | 1.00 | 50.00 | . |
| ATOM | 65 | C   | C   | . | GLY | GLY | . | 14 | 14 | . | 15.543 | 26.349 | -8.588  | 1.00 | 50.00 | . |
| ATOM | 66 | O   | O   | . | GLY | GLY | . | 14 | 14 | . | 16.550 | 26.865 | -8.123  | 1.00 | 50.00 | . |
| ATOM | 67 | N   | N   | . | SER | SER | . | 15 | 15 | . | 14.580 | 27.061 | -9.167  | 1.00 | 50.00 | . |
| ATOM | 68 | CA  | CA  | . | SER | SER | . | 15 | 15 | . | 14.571 | 28.533 | -9.120  | 1.00 | 50.00 | . |
| ATOM | 69 | C   | C   | . | SER | SER | . | 15 | 15 | . | 14.154 | 28.978 | -7.711  | 1.00 | 50.00 | . |
| ATOM | 70 | O   | O   | . | SER | SER | . | 15 | 15 | . | 13.455 | 28.259 | -6.990  | 1.00 | 50.00 | . |
| ATOM | 71 | CB  | CB  | . | SER | SER | . | 15 | 15 | . | 13.610 | 29.115 | -10.162 | 1.00 | 50.00 | . |
| ATOM | 72 | OG  | OG  | . | SER | SER | . | 15 | 15 | . | 12.260 | 28.801 | -9.813  | 1.00 | 50.00 | . |
| ATOM | 73 | N   | N   | . | VAL | VAL | . | 16 | 16 | . | 14.649 | 30.147 | -7.330  | 1.00 | 50.00 | . |
| ATOM | 74 | CA  | CA  | . | VAL | VAL | . | 16 | 16 | . | 14.320 | 30.745 | -6.021  | 1.00 | 50.00 | . |
| ATOM | 75 | C   | C   | . | VAL | VAL | . | 16 | 16 | . | 13.486 | 31.994 | -6.291  | 1.00 | 50.00 | . |
| ATOM | 76 | O   | O   | . | VAL | VAL | . | 16 | 16 | . | 13.866 | 32.854 | -7.085  | 1.00 | 50.00 | . |
| ATOM | 77 | CB  | CB  | . | VAL | VAL | . | 16 | 16 | . | 15.584 | 31.129 | -5.235  | 1.00 | 50.00 | . |
| ATOM | 78 | CG1 | CG1 | . | VAL | VAL | . | 16 | 16 | . | 15.266 | 31.698 | -3.848  | 1.00 | 50.00 | . |
| ATOM | 79 | CG2 | CG2 | . | VAL | VAL | . | 16 | 16 | . | 16.464 | 29.906 | -5.035  | 1.00 | 50.00 | . |
| ATOM | 80 | N   | N   | . | LEU | LEU | . | 17 | 17 | . | 12.428 | 32.120 | -5.505  | 1.00 | 50.00 | . |
| ATOM | 81 | CA  | CA  | . | LEU | LEU | . | 17 | 17 | . | 11.447 | 33.201 | -5.693  | 1.00 | 50.00 | . |
| ATOM | 82 | C   | C   | . | LEU | LEU | . | 17 | 17 | . | 10.507 | 33.348 | -4.492  | 1.00 | 50.00 | . |
| ATOM | 83 | O   | O   | . | LEU | LEU | . | 17 | 17 | . | 10.506 | 32.533 | -3.568  | 1.00 | 50.00 | . |
| ATOM | 84 | CB  | CB  | . | LEU | LEU | . | 17 | 17 | . | 10.678 | 32.973 | -7.012  | 1.00 | 50.00 | . |
| ATOM | 85 | CG  | CG  | . | LEU | LEU | . | 17 | 17 | . | 10.214 | 31.530 | -7.260  | 1.00 | 50.00 | . |
| ATOM | 86 | CD1 | CD1 | . | LEU | LEU | . | 17 | 17 | . | 9.112  | 31.092 | -6.302  | 1.00 | 50.00 | . |
| ATOM | 87 | CD2 | CD2 | . | LEU | LEU | . | 17 | 17 | . | 9.732  | 31.375 | -8.698  | 1.00 | 50.00 | . |

|      |     |     |     |   |     |     |   |   |    |    |   |        |        |        |      |       |   |
|------|-----|-----|-----|---|-----|-----|---|---|----|----|---|--------|--------|--------|------|-------|---|
| ATOM | 88  | N   | N   | . | LYS | LYS | . | . | 18 | 18 | . | 9.705  | 34.400 | -4.573 | 1.00 | 50.00 | . |
| ATOM | 89  | CA  | CA  | . | LYS | LYS | . | . | 18 | 18 | . | 8.703  | 34.722 | -3.546 | 1.00 | 50.00 | . |
| ATOM | 90  | C   | C   | . | LYS | LYS | . | . | 18 | 18 | . | 7.304  | 34.432 | -4.104 | 1.00 | 50.00 | . |
| ATOM | 91  | O   | O   | . | LYS | LYS | . | . | 18 | 18 | . | 7.048  | 34.562 | -5.305 | 1.00 | 50.00 | . |
| ATOM | 92  | CB  | CB  | . | LYS | LYS | . | . | 18 | 18 | . | 8.785  | 36.206 | -3.192 | 1.00 | 50.00 | . |
| ATOM | 93  | CG  | CG  | . | LYS | LYS | . | . | 18 | 18 | . | 10.179 | 36.680 | -2.781 | 1.00 | 50.00 | . |
| ATOM | 94  | CD  | CD  | . | LYS | LYS | . | . | 18 | 18 | . | 10.236 | 38.196 | -2.935 | 1.00 | 50.00 | . |
| ATOM | 95  | CE  | CE  | . | LYS | LYS | . | . | 18 | 18 | . | 11.574 | 38.763 | -2.491 | 1.00 | 50.00 | . |
| ATOM | 96  | NZ  | NZ  | . | LYS | LYS | . | . | 18 | 18 | . | 11.826 | 40.079 | -3.083 | 1.00 | 50.00 | . |
| ATOM | 97  | N   | N   | . | LEU | LEU | . | . | 19 | 19 | . | 6.435  | 34.016 | -3.193 | 1.00 | 50.00 | . |
| ATOM | 98  | CA  | CA  | . | LEU | LEU | . | . | 19 | 19 | . | 5.027  | 33.712 | -3.507 | 1.00 | 50.00 | . |
| ATOM | 99  | C   | C   | . | LEU | LEU | . | . | 19 | 19 | . | 4.127  | 34.752 | -2.847 | 1.00 | 50.00 | . |
| ATOM | 100 | O   | O   | . | LEU | LEU | . | . | 19 | 19 | . | 4.015  | 34.821 | -1.625 | 1.00 | 50.00 | . |
| ATOM | 101 | CB  | CB  | . | LEU | LEU | . | . | 19 | 19 | . | 4.624  | 32.308 | -3.036 | 1.00 | 50.00 | . |
| ATOM | 102 | CG  | CG  | . | LEU | LEU | . | . | 19 | 19 | . | 5.104  | 31.165 | -3.939 | 1.00 | 50.00 | . |
| ATOM | 103 | CD1 | CD1 | . | LEU | LEU | . | . | 19 | 19 | . | 6.623  | 31.017 | -3.948 | 1.00 | 50.00 | . |
| ATOM | 104 | CD2 | CD2 | . | LEU | LEU | . | . | 19 | 19 | . | 4.508  | 29.850 | -3.444 | 1.00 | 50.00 | . |
| ATOM | 105 | N   | N   | . | LEU | LEU | . | . | 20 | 20 | . | 3.608  | 35.622 | -3.696 | 1.00 | 50.00 | . |
| ATOM | 106 | CA  | CA  | . | LEU | LEU | . | . | 20 | 20 | . | 2.723  | 36.720 | -3.292 | 1.00 | 50.00 | . |
| ATOM | 107 | C   | C   | . | LEU | LEU | . | . | 20 | 20 | . | 1.264  | 36.327 | -3.411 | 1.00 | 50.00 | . |
| ATOM | 108 | O   | O   | . | LEU | LEU | . | . | 20 | 20 | . | 0.825  | 35.890 | -4.471 | 1.00 | 50.00 | . |
| ATOM | 109 | CB  | CB  | . | LEU | LEU | . | . | 20 | 20 | . | 2.932  | 37.905 | -4.238 | 1.00 | 50.00 | . |
| ATOM | 110 | CG  | CG  | . | LEU | LEU | . | . | 20 | 20 | . | 4.319  | 38.510 | -4.129 | 1.00 | 50.00 | . |
| ATOM | 111 | CD1 | CD1 | . | LEU | LEU | . | . | 20 | 20 | . | 4.443  | 39.755 | -4.998 | 1.00 | 50.00 | . |
| ATOM | 112 | CD2 | CD2 | . | LEU | LEU | . | . | 20 | 20 | . | 4.396  | 39.015 | -2.721 | 1.00 | 50.00 | . |
| ATOM | 113 | N   | N   | . | ASN | ASN | . | . | 21 | 21 | . | 0.530  | 36.499 | -2.322 | 1.00 | 50.00 | . |
| ATOM | 114 | CA  | CA  | . | ASN | ASN | . | . | 21 | 21 | . | -0.925 | 36.292 | -2.350 | 1.00 | 50.00 | . |
| ATOM | 115 | C   | C   | . | ASN | ASN | . | . | 21 | 21 | . | -1.549 | 37.414 | -3.184 | 1.00 | 50.00 | . |
| ATOM | 116 | O   | O   | . | ASN | ASN | . | . | 21 | 21 | . | -1.486 | 38.582 | -2.818 | 1.00 | 50.00 | . |
| ATOM | 117 | CB  | CB  | . | ASN | ASN | . | . | 21 | 21 | . | -1.486 | 36.292 | -0.931 | 1.00 | 50.00 | . |
| ATOM | 118 | CG  | CG  | . | ASN | ASN | . | . | 21 | 21 | . | -2.941 | 35.830 | -0.936 | 1.00 | 50.00 | . |
| ATOM | 119 | OD1 | OD1 | . | ASN | ASN | . | . | 21 | 21 | . | -3.864 | 36.606 | -1.154 | 1.00 | 50.00 | . |
| ATOM | 120 | ND2 | ND2 | . | ASN | ASN | . | . | 21 | 21 | . | -3.110 | 34.532 | -0.815 | 1.00 | 50.00 | . |
| ATOM | 121 | N   | N   | . | THR | THR | . | . | 22 | 22 | . | -2.249 | 37.020 | -4.234 | 1.00 | 50.00 | . |
| ATOM | 122 | CA  | CA  | . | THR | THR | . | . | 22 | 22 | . | -2.805 | 37.970 | -5.225 | 1.00 | 50.00 | . |
| ATOM | 123 | C   | C   | . | THR | THR | . | . | 22 | 22 | . | -3.732 | 39.056 | -4.661 | 1.00 | 50.00 | . |
| ATOM | 124 | O   | O   | . | THR | THR | . | . | 22 | 22 | . | -3.582 | 40.227 | -4.994 | 1.00 | 50.00 | . |
| ATOM | 125 | CB  | CB  | . | THR | THR | . | . | 22 | 22 | . | -3.566 | 37.217 | -6.310 | 1.00 | 50.00 | . |
| ATOM | 126 | OG1 | OG1 | . | THR | THR | . | . | 22 | 22 | . | -4.619 | 36.464 | -5.693 | 1.00 | 50.00 | . |
| ATOM | 127 | CG2 | CG2 | . | THR | THR | . | . | 22 | 22 | . | -2.589 | 36.376 | -7.135 | 1.00 | 50.00 | . |
| ATOM | 128 | N   | N   | . | HIS | HIS | . | . | 23 | 23 | . | -4.609 | 38.659 | -3.741 | 1.00 | 50.00 | . |
| ATOM | 129 | CA  | CA  | . | HIS | HIS | . | . | 23 | 23 | . | -5.629 | 39.565 | -3.182 | 1.00 | 50.00 | . |
| ATOM | 130 | C   | C   | . | HIS | HIS | . | . | 23 | 23 | . | -5.125 | 40.378 | -1.984 | 1.00 | 50.00 | . |
| ATOM | 131 | O   | O   | . | HIS | HIS | . | . | 23 | 23 | . | -5.618 | 41.471 | -1.721 | 1.00 | 50.00 | . |
| ATOM | 132 | CB  | CB  | . | HIS | HIS | . | . | 23 | 23 | . | -6.886 | 38.782 | -2.792 | 1.00 | 50.00 | . |
| ATOM | 133 | CG  | CG  | . | HIS | HIS | . | . | 23 | 23 | . | -7.586 | 38.191 | -4.019 | 1.00 | 50.00 | . |
| ATOM | 134 | ND1 | ND1 | . | HIS | HIS | . | . | 23 | 23 | . | -7.338 | 37.002 | -4.557 | 1.00 | 50.00 | . |
| ATOM | 135 | CD2 | CD2 | . | HIS | HIS | . | . | 23 | 23 | . | -8.584 | 38.746 | -4.701 | 1.00 | 50.00 | . |
| ATOM | 136 | CE1 | CE1 | . | HIS | HIS | . | . | 23 | 23 | . | -8.181 | 36.817 | -5.566 | 1.00 | 50.00 | . |
| ATOM | 137 | NE2 | NE2 | . | HIS | HIS | . | . | 23 | 23 | . | -8.955 | 37.895 | -5.655 | 1.00 | 50.00 | . |
| ATOM | 138 | N   | N   | . | HIS | HIS | . | . | 24 | 24 | . | -4.146 | 39.824 | -1.273 | 1.00 | 50.00 | . |
| ATOM | 139 | CA  | CA  | . | HIS | HIS | . | . | 24 | 24 | . | -3.619 | 40.470 | -0.062 | 1.00 | 50.00 | . |
| ATOM | 140 | C   | C   | . | HIS | HIS | . | . | 24 | 24 | . | -2.282 | 41.179 | -0.241 | 1.00 | 50.00 | . |
| ATOM | 141 | O   | O   | . | HIS | HIS | . | . | 24 | 24 | . | -2.010 | 42.086 | 0.539  | 1.00 | 50.00 | . |
| ATOM | 142 | CB  | CB  | . | HIS | HIS | . | . | 24 | 24 | . | -3.518 | 39.494 | 1.105  | 1.00 | 50.00 | . |
| ATOM | 143 | CG  | CG  | . | HIS | HIS | . | . | 24 | 24 | . | -4.922 | 39.095 | 1.529  | 1.00 | 50.00 | . |
| ATOM | 144 | ND1 | ND1 | . | HIS | HIS | . | . | 24 | 24 | . | -5.790 | 39.848 | 2.197  | 1.00 | 50.00 | . |

|      |     |     |     |   |     |     |   |   |    |    |   |        |        |        |      |       |   |
|------|-----|-----|-----|---|-----|-----|---|---|----|----|---|--------|--------|--------|------|-------|---|
| ATOM | 145 | CD2 | CD2 | . | HIS | HIS | . | . | 24 | 24 | . | -5.426 | 37.883 | 1.398  | 1.00 | 50.00 | . |
| ATOM | 146 | CE1 | CE1 | . | HIS | HIS | . | . | 24 | 24 | . | -6.830 | 39.091 | 2.514  | 1.00 | 50.00 | . |
| ATOM | 147 | NE2 | NE2 | . | HIS | HIS | . | . | 24 | 24 | . | -6.588 | 37.881 | 2.030  | 1.00 | 50.00 | . |
| ATOM | 148 | N   | N   | . | ARG | ARG | . | . | 25 | 25 | . | -1.457 | 40.683 | -1.173 | 1.00 | 50.00 | . |
| ATOM | 149 | CA  | CA  | . | ARG | ARG | . | . | 25 | 25 | . | -0.115 | 41.209 | -1.531 | 1.00 | 50.00 | . |
| ATOM | 150 | C   | C   | . | ARG | ARG | . | . | 25 | 25 | . | 1.005  | 40.687 | -0.610 | 1.00 | 50.00 | . |
| ATOM | 151 | O   | O   | . | ARG | ARG | . | . | 25 | 25 | . | 2.200  | 40.870 | -0.838 | 1.00 | 50.00 | . |
| ATOM | 152 | CB  | CB  | . | ARG | ARG | . | . | 25 | 25 | . | -0.158 | 42.742 | -1.571 | 1.00 | 50.00 | . |
| ATOM | 153 | CG  | CG  | . | ARG | ARG | . | . | 25 | 25 | . | 1.169  | 43.466 | -1.775 | 1.00 | 50.00 | . |
| ATOM | 154 | CD  | CD  | . | ARG | ARG | . | . | 25 | 25 | . | 0.962  | 44.961 | -1.542 | 1.00 | 50.00 | . |
| ATOM | 155 | NE  | NE  | . | ARG | ARG | . | . | 25 | 25 | . | 0.057  | 45.496 | -2.575 | 1.00 | 50.00 | . |
| ATOM | 156 | CZ  | CZ  | . | ARG | ARG | . | . | 25 | 25 | . | 0.387  | 45.766 | -3.841 | 1.00 | 50.00 | . |
| ATOM | 157 | NH1 | NH1 | . | ARG | ARG | . | . | 25 | 25 | . | 1.622  | 45.573 | -4.287 | 1.00 | 50.00 | . |
| ATOM | 158 | NH2 | NH2 | . | ARG | ARG | . | . | 25 | 25 | . | -0.529 | 46.230 | -4.676 | 1.00 | 50.00 | . |
| ATOM | 159 | N   | N   | . | VAL | VAL | . | . | 26 | 26 | . | 0.580  | 39.959 | 0.407  | 1.00 | 50.00 | . |
| ATOM | 160 | CA  | CA  | . | VAL | VAL | . | . | 26 | 26 | . | 1.457  | 39.338 | 1.395  | 1.00 | 50.00 | . |
| ATOM | 161 | C   | C   | . | VAL | VAL | . | . | 26 | 26 | . | 2.332  | 38.251 | 0.738  | 1.00 | 50.00 | . |
| ATOM | 162 | O   | O   | . | VAL | VAL | . | . | 26 | 26 | . | 1.868  | 37.544 | -0.156 | 1.00 | 50.00 | . |
| ATOM | 163 | CB  | CB  | . | VAL | VAL | . | . | 26 | 26 | . | 0.467  | 38.841 | 2.451  | 1.00 | 50.00 | . |
| ATOM | 164 | CG1 | CG1 | . | VAL | VAL | . | . | 26 | 26 | . | -0.273 | 37.534 | 2.162  | 1.00 | 50.00 | . |
| ATOM | 165 | CG2 | CG2 | . | VAL | VAL | . | . | 26 | 26 | . | 1.170  | 38.740 | 3.768  | 1.00 | 50.00 | . |
| ATOM | 166 | N   | N   | . | ARG | ARG | . | . | 27 | 27 | . | 3.528  | 38.052 | 1.275  | 1.00 | 50.00 | . |
| ATOM | 167 | CA  | CA  | . | ARG | ARG | . | . | 27 | 27 | . | 4.465  | 37.037 | 0.754  | 1.00 | 50.00 | . |
| ATOM | 168 | C   | C   | . | ARG | ARG | . | . | 27 | 27 | . | 4.436  | 35.818 | 1.674  | 1.00 | 50.00 | . |
| ATOM | 169 | O   | O   | . | ARG | ARG | . | . | 27 | 27 | . | 4.551  | 35.974 | 2.889  | 1.00 | 50.00 | . |
| ATOM | 170 | CB  | CB  | . | ARG | ARG | . | . | 27 | 27 | . | 5.919  | 37.528 | 0.779  | 1.00 | 50.00 | . |
| ATOM | 171 | CG  | CG  | . | ARG | ARG | . | . | 27 | 27 | . | 6.279  | 38.707 | -0.124 | 1.00 | 50.00 | . |
| ATOM | 172 | CD  | CD  | . | ARG | ARG | . | . | 27 | 27 | . | 5.676  | 40.091 | 0.215  | 1.00 | 50.00 | . |
| ATOM | 173 | NE  | NE  | . | ARG | ARG | . | . | 27 | 27 | . | 5.645  | 41.023 | -0.948 | 1.00 | 50.00 | . |
| ATOM | 174 | CZ  | CZ  | . | ARG | ARG | . | . | 27 | 27 | . | 6.652  | 41.340 | -1.778 | 1.00 | 50.00 | . |
| ATOM | 175 | NH1 | NH1 | . | ARG | ARG | . | . | 27 | 27 | . | 7.846  | 40.782 | -1.643 | 1.00 | 50.00 | . |
| ATOM | 176 | NH2 | NH2 | . | ARG | ARG | . | . | 27 | 27 | . | 6.458  | 42.147 | -2.814 | 1.00 | 50.00 | . |
| ATOM | 177 | N   | N   | . | LEU | LEU | . | . | 28 | 28 | . | 4.441  | 34.640 | 1.062  | 1.00 | 50.00 | . |
| ATOM | 178 | CA  | CA  | . | LEU | LEU | . | . | 28 | 28 | . | 4.605  | 33.369 | 1.790  | 1.00 | 50.00 | . |
| ATOM | 179 | C   | C   | . | LEU | LEU | . | . | 28 | 28 | . | 5.946  | 33.418 | 2.536  | 1.00 | 50.00 | . |
| ATOM | 180 | O   | O   | . | LEU | LEU | . | . | 28 | 28 | . | 6.969  | 33.803 | 1.971  | 1.00 | 50.00 | . |
| ATOM | 181 | CB  | CB  | . | LEU | LEU | . | . | 28 | 28 | . | 4.584  | 32.194 | 0.806  | 1.00 | 50.00 | . |
| ATOM | 182 | CG  | CG  | . | LEU | LEU | . | . | 28 | 28 | . | 4.492  | 30.839 | 1.518  | 1.00 | 50.00 | . |
| ATOM | 183 | CD1 | CD1 | . | LEU | LEU | . | . | 28 | 28 | . | 3.175  | 30.710 | 2.289  | 1.00 | 50.00 | . |
| ATOM | 184 | CD2 | CD2 | . | LEU | LEU | . | . | 28 | 28 | . | 4.621  | 29.702 | 0.505  | 1.00 | 50.00 | . |
| ATOM | 185 | N   | N   | . | HIS | HIS | . | . | 29 | 29 | . | 5.887  | 33.068 | 3.811  | 1.00 | 50.00 | . |
| ATOM | 186 | CA  | CA  | . | HIS | HIS | . | . | 29 | 29 | . | 6.997  | 33.303 | 4.744  | 1.00 | 50.00 | . |
| ATOM | 187 | C   | C   | . | HIS | HIS | . | . | 29 | 29 | . | 7.055  | 32.216 | 5.818  | 1.00 | 50.00 | . |
| ATOM | 188 | O   | O   | . | HIS | HIS | . | . | 29 | 29 | . | 6.068  | 31.536 | 6.105  | 1.00 | 50.00 | . |
| ATOM | 189 | CB  | CB  | . | HIS | HIS | . | . | 29 | 29 | . | 6.766  | 34.673 | 5.387  | 1.00 | 50.00 | . |
| ATOM | 190 | CG  | CG  | . | HIS | HIS | . | . | 29 | 29 | . | 7.894  | 35.098 | 6.327  | 1.00 | 50.00 | . |
| ATOM | 191 | ND1 | ND1 | . | HIS | HIS | . | . | 29 | 29 | . | 7.951  | 34.840 | 7.629  | 1.00 | 50.00 | . |
| ATOM | 192 | CD2 | CD2 | . | HIS | HIS | . | . | 29 | 29 | . | 8.901  | 35.907 | 6.026  | 1.00 | 50.00 | . |
| ATOM | 193 | CE1 | CE1 | . | HIS | HIS | . | . | 29 | 29 | . | 8.993  | 35.493 | 8.134  | 1.00 | 50.00 | . |
| ATOM | 194 | NE2 | NE2 | . | HIS | HIS | . | . | 29 | 29 | . | 9.571  | 36.165 | 7.142  | 1.00 | 50.00 | . |
| ATOM | 195 | N   | N   | . | SER | SER | . | . | 30 | 30 | . | 8.275  | 31.997 | 6.280  | 1.00 | 50.00 | . |
| ATOM | 196 | CA  | CA  | . | SER | SER | . | . | 30 | 30 | . | 8.550  | 31.090 | 7.401  | 1.00 | 50.00 | . |
| ATOM | 197 | C   | C   | . | SER | SER | . | . | 30 | 30 | . | 9.743  | 31.636 | 8.197  | 1.00 | 50.00 | . |
| ATOM | 198 | O   | O   | . | SER | SER | . | . | 30 | 30 | . | 10.395 | 32.608 | 7.817  | 1.00 | 50.00 | . |
| ATOM | 199 | CB  | CB  | . | SER | SER | . | . | 30 | 30 | . | 8.802  | 29.676 | 6.872  | 1.00 | 50.00 | . |
| ATOM | 200 | OG  | OG  | . | SER | SER | . | . | 30 | 30 | . | 8.940  | 28.766 | 7.962  | 1.00 | 50.00 | . |
| ATOM | 201 | N   | N   | . | HIS | HIS | . | . | 31 | 31 | . | 9.992  | 31.004 | 9.333  | 1.00 | 50.00 | . |

|      |     |     |     |   |     |     |   |    |    |   |        |        |        |      |       |   |
|------|-----|-----|-----|---|-----|-----|---|----|----|---|--------|--------|--------|------|-------|---|
| ATOM | 202 | CA  | CA  | . | HIS | HIS | . | 31 | 31 | . | 10.960 | 31.471 | 10.346 | 1.00 | 50.00 | . |
| ATOM | 203 | C   | C   | . | HIS | HIS | . | 31 | 31 | . | 11.157 | 30.403 | 11.427 | 1.00 | 50.00 | . |
| ATOM | 204 | O   | O   | . | HIS | HIS | . | 31 | 31 | . | 10.459 | 29.396 | 11.442 | 1.00 | 50.00 | . |
| ATOM | 205 | CB  | CB  | . | HIS | HIS | . | 31 | 31 | . | 10.463 | 32.796 | 10.967 | 1.00 | 50.00 | . |
| ATOM | 206 | CG  | CG  | . | HIS | HIS | . | 31 | 31 | . | 8.957  | 32.851 | 11.288 | 1.00 | 50.00 | . |
| ATOM | 207 | ND1 | ND1 | . | HIS | HIS | . | 31 | 31 | . | 8.209  | 33.948 | 11.239 | 1.00 | 50.00 | . |
| ATOM | 208 | CD2 | CD2 | . | HIS | HIS | . | 31 | 31 | . | 8.133  | 31.816 | 11.454 | 1.00 | 50.00 | . |
| ATOM | 209 | CE1 | CE1 | . | HIS | HIS | . | 31 | 31 | . | 6.931  | 33.575 | 11.307 | 1.00 | 50.00 | . |
| ATOM | 210 | NE2 | NE2 | . | HIS | HIS | . | 31 | 31 | . | 6.886  | 32.253 | 11.446 | 1.00 | 50.00 | . |
| ATOM | 211 | N   | N   | . | ASP | ASP | . | 32 | 32 | . | 11.970 | 30.717 | 12.428 | 1.00 | 50.00 | . |
| ATOM | 212 | CA  | CA  | . | ASP | ASP | . | 32 | 32 | . | 12.251 | 29.775 | 13.528 | 1.00 | 50.00 | . |
| ATOM | 213 | C   | C   | . | ASP | ASP | . | 32 | 32 | . | 11.218 | 29.890 | 14.670 | 1.00 | 50.00 | . |
| ATOM | 214 | O   | O   | . | ASP | ASP | . | 32 | 32 | . | 11.548 | 29.975 | 15.851 | 1.00 | 50.00 | . |
| ATOM | 215 | CB  | CB  | . | ASP | ASP | . | 32 | 32 | . | 13.688 | 29.986 | 14.019 | 1.00 | 50.00 | . |
| ATOM | 216 | CG  | CG  | . | ASP | ASP | . | 32 | 32 | . | 14.204 | 28.804 | 14.853 | 1.00 | 50.00 | . |
| ATOM | 217 | OD1 | OD1 | . | ASP | ASP | . | 32 | 32 | . | 13.388 | 28.104 | 15.493 | 1.00 | 50.00 | . |
| ATOM | 218 | OD2 | OD2 | . | ASP | ASP | . | 32 | 32 | . | 15.425 | 28.567 | 14.760 | 1.00 | 50.00 | . |
| ATOM | 219 | N   | N   | . | ILE | ILE | . | 33 | 33 | . | 9.959  | 30.006 | 14.272 | 1.00 | 50.00 | . |
| ATOM | 220 | CA  | CA  | . | ILE | ILE | . | 33 | 33 | . | 8.827  | 30.078 | 15.212 | 1.00 | 50.00 | . |
| ATOM | 221 | C   | C   | . | ILE | ILE | . | 33 | 33 | . | 7.935  | 28.869 | 14.937 | 1.00 | 50.00 | . |
| ATOM | 222 | O   | O   | . | ILE | ILE | . | 33 | 33 | . | 7.428  | 28.696 | 13.834 | 1.00 | 50.00 | . |
| ATOM | 223 | CB  | CB  | . | ILE | ILE | . | 33 | 33 | . | 8.078  | 31.411 | 15.053 | 1.00 | 50.00 | . |
| ATOM | 224 | CG1 | CG1 | . | ILE | ILE | . | 33 | 33 | . | 9.080  | 32.535 | 15.353 | 1.00 | 50.00 | . |
| ATOM | 225 | CG2 | CG2 | . | ILE | ILE | . | 33 | 33 | . | 6.841  | 31.480 | 15.969 | 1.00 | 50.00 | . |
| ATOM | 226 | CD1 | CD1 | . | ILE | ILE | . | 33 | 33 | . | 8.609  | 33.954 | 15.068 | 1.00 | 50.00 | . |
| ATOM | 227 | N   | N   | . | LYS | LYS | . | 34 | 34 | . | 7.775  | 28.052 | 15.965 | 1.00 | 50.00 | . |
| ATOM | 228 | CA  | CA  | . | LYS | LYS | . | 34 | 34 | . | 6.979  | 26.820 | 15.846 | 1.00 | 50.00 | . |
| ATOM | 229 | C   | C   | . | LYS | LYS | . | 34 | 34 | . | 5.555  | 27.022 | 16.371 | 1.00 | 50.00 | . |
| ATOM | 230 | O   | O   | . | LYS | LYS | . | 34 | 34 | . | 5.292  | 27.903 | 17.190 | 1.00 | 50.00 | . |
| ATOM | 231 | CB  | CB  | . | LYS | LYS | . | 34 | 34 | . | 7.654  | 25.665 | 16.588 | 1.00 | 50.00 | . |
| ATOM | 232 | CG  | CG  | . | LYS | LYS | . | 34 | 34 | . | 9.017  | 25.333 | 15.976 | 1.00 | 50.00 | . |
| ATOM | 233 | CD  | CD  | . | LYS | LYS | . | 34 | 34 | . | 9.539  | 24.001 | 16.508 | 1.00 | 50.00 | . |
| ATOM | 234 | CE  | CE  | . | LYS | LYS | . | 34 | 34 | . | 10.871 | 23.653 | 15.844 | 1.00 | 50.00 | . |
| ATOM | 235 | NZ  | NZ  | . | LYS | LYS | . | 34 | 34 | . | 11.269 | 22.276 | 16.167 | 1.00 | 50.00 | . |
| ATOM | 236 | N   | N   | . | TYR | TYR | . | 35 | 35 | . | 4.642  | 26.249 | 15.794 | 1.00 | 50.00 | . |
| ATOM | 237 | CA  | CA  | . | TYR | TYR | . | 35 | 35 | . | 3.239  | 26.212 | 16.244 | 1.00 | 50.00 | . |
| ATOM | 238 | C   | C   | . | TYR | TYR | . | 35 | 35 | . | 3.149  | 25.698 | 17.687 | 1.00 | 50.00 | . |
| ATOM | 239 | O   | O   | . | TYR | TYR | . | 35 | 35 | . | 3.965  | 24.892 | 18.128 | 1.00 | 50.00 | . |
| ATOM | 240 | CB  | CB  | . | TYR | TYR | . | 35 | 35 | . | 2.391  | 25.310 | 15.340 | 1.00 | 50.00 | . |
| ATOM | 241 | CG  | CG  | . | TYR | TYR | . | 35 | 35 | . | 2.171  | 25.894 | 13.944 | 1.00 | 50.00 | . |
| ATOM | 242 | CD1 | CD1 | . | TYR | TYR | . | 35 | 35 | . | 1.526  | 27.117 | 13.788 | 1.00 | 50.00 | . |
| ATOM | 243 | CD2 | CD2 | . | TYR | TYR | . | 35 | 35 | . | 2.494  | 25.132 | 12.828 | 1.00 | 50.00 | . |
| ATOM | 244 | CE1 | CE1 | . | TYR | TYR | . | 35 | 35 | . | 1.199  | 27.572 | 12.520 | 1.00 | 50.00 | . |
| ATOM | 245 | CE2 | CE2 | . | TYR | TYR | . | 35 | 35 | . | 2.164  | 25.585 | 11.558 | 1.00 | 50.00 | . |
| ATOM | 246 | CZ  | CZ  | . | TYR | TYR | . | 35 | 35 | . | 1.519  | 26.807 | 11.410 | 1.00 | 50.00 | . |
| ATOM | 247 | OH  | OH  | . | TYR | TYR | . | 35 | 35 | . | 1.271  | 27.326 | 10.186 | 1.00 | 50.00 | . |
| ATOM | 248 | N   | N   | . | GLY | GLY | . | 36 | 36 | . | 2.123  | 26.194 | 18.380 | 1.00 | 50.00 | . |
| ATOM | 249 | CA  | CA  | . | GLY | GLY | . | 36 | 36 | . | 1.807  | 25.751 | 19.751 | 1.00 | 50.00 | . |
| ATOM | 250 | C   | C   | . | GLY | GLY | . | 36 | 36 | . | 0.377  | 25.204 | 19.815 | 1.00 | 50.00 | . |
| ATOM | 251 | O   | O   | . | GLY | GLY | . | 36 | 36 | . | -0.435 | 25.697 | 20.593 | 1.00 | 50.00 | . |
| ATOM | 252 | N   | N   | . | SER | SER | . | 37 | 37 | . | 0.072  | 24.283 | 18.901 | 1.00 | 50.00 | . |
| ATOM | 253 | CA  | CA  | . | SER | SER | . | 37 | 37 | . | -1.300 | 23.763 | 18.719 | 1.00 | 50.00 | . |
| ATOM | 254 | C   | C   | . | SER | SER | . | 37 | 37 | . | -1.365 | 22.415 | 17.985 | 1.00 | 50.00 | . |
| ATOM | 255 | O   | O   | . | SER | SER | . | 37 | 37 | . | -1.501 | 21.381 | 18.631 | 1.00 | 50.00 | . |
| ATOM | 256 | CB  | CB  | . | SER | SER | . | 37 | 37 | . | -2.192 | 24.810 | 18.028 | 1.00 | 50.00 | . |
| ATOM | 257 | OG  | OG  | . | SER | SER | . | 37 | 37 | . | -1.620 | 25.217 | 16.775 | 1.00 | 50.00 | . |
| ATOM | 258 | N   | N   | . | GLY | GLY | . | 38 | 38 | . | -1.220 | 22.462 | 16.653 | 1.00 | 50.00 | . |



|      |     |     |     |   |     |     |   |    |    |   |        |        |        |      |       |   |
|------|-----|-----|-----|---|-----|-----|---|----|----|---|--------|--------|--------|------|-------|---|
| ATOM | 259 | CA  | CA  | . | GLY | GLY | . | 38 | 38 | . | -1.400 | 21.294 | 15.769 | 1.00 | 50.00 | . |
| ATOM | 260 | C   | C   | . | GLY | GLY | . | 38 | 38 | . | -0.297 | 20.249 | 15.954 | 1.00 | 50.00 | . |
| ATOM | 261 | O   | O   | . | GLY | GLY | . | 38 | 38 | . | -0.228 | 19.540 | 16.953 | 1.00 | 50.00 | . |
| ATOM | 262 | N   | N   | . | SER | SER | . | 39 | 39 | . | 0.612  | 20.246 | 14.990 | 1.00 | 50.00 | . |
| ATOM | 263 | CA  | CA  | . | SER | SER | . | 39 | 39 | . | 1.776  | 19.337 | 15.008 | 1.00 | 50.00 | . |
| ATOM | 264 | C   | C   | . | SER | SER | . | 39 | 39 | . | 2.931  | 19.871 | 15.872 | 1.00 | 50.00 | . |
| ATOM | 265 | O   | O   | . | SER | SER | . | 39 | 39 | . | 3.901  | 19.164 | 16.133 | 1.00 | 50.00 | . |
| ATOM | 266 | CB  | CB  | . | SER | SER | . | 39 | 39 | . | 2.264  | 19.098 | 13.579 | 1.00 | 50.00 | . |
| ATOM | 267 | OG  | OG  | . | SER | SER | . | 39 | 39 | . | 2.718  | 20.334 | 13.015 | 1.00 | 50.00 | . |
| ATOM | 268 | N   | N   | . | GLY | GLY | . | 40 | 40 | . | 2.853  | 21.179 | 16.165 | 1.00 | 50.00 | . |
| ATOM | 269 | CA  | CA  | . | GLY | GLY | . | 40 | 40 | . | 3.920  | 21.931 | 16.854 | 1.00 | 50.00 | . |
| ATOM | 270 | C   | C   | . | GLY | GLY | . | 40 | 40 | . | 5.194  | 22.039 | 16.001 | 1.00 | 50.00 | . |
| ATOM | 271 | O   | O   | . | GLY | GLY | . | 40 | 40 | . | 6.291  | 22.241 | 16.514 | 1.00 | 50.00 | . |
| ATOM | 272 | N   | N   | . | GLN | GLN | . | 41 | 41 | . | 5.019  | 21.887 | 14.690 | 1.00 | 50.00 | . |
| ATOM | 273 | CA  | CA  | . | GLN | GLN | . | 41 | 41 | . | 6.103  | 22.081 | 13.712 | 1.00 | 50.00 | . |
| ATOM | 274 | C   | C   | . | GLN | GLN | . | 41 | 41 | . | 6.284  | 23.577 | 13.435 | 1.00 | 50.00 | . |
| ATOM | 275 | O   | O   | . | GLN | GLN | . | 41 | 41 | . | 5.470  | 24.404 | 13.851 | 1.00 | 50.00 | . |
| ATOM | 276 | CB  | CB  | . | GLN | GLN | . | 41 | 41 | . | 5.789  | 21.339 | 12.414 | 1.00 | 50.00 | . |
| ATOM | 277 | CG  | CG  | . | GLN | GLN | . | 41 | 41 | . | 5.767  | 19.823 | 12.622 | 1.00 | 50.00 | . |
| ATOM | 278 | CD  | CD  | . | GLN | GLN | . | 41 | 41 | . | 5.399  | 19.092 | 11.333 | 1.00 | 50.00 | . |
| ATOM | 279 | OE1 | OE1 | . | GLN | GLN | . | 41 | 41 | . | 4.711  | 19.601 | 10.456 | 1.00 | 50.00 | . |
| ATOM | 280 | NE2 | NE2 | . | GLN | GLN | . | 41 | 41 | . | 5.854  | 17.865 | 11.246 | 1.00 | 50.00 | . |
| ATOM | 281 | N   | N   | . | GLN | GLN | . | 42 | 42 | . | 7.344  | 23.892 | 12.700 | 1.00 | 50.00 | . |
| ATOM | 282 | CA  | CA  | . | GLN | GLN | . | 42 | 42 | . | 7.651  | 25.277 | 12.304 | 1.00 | 50.00 | . |
| ATOM | 283 | C   | C   | . | GLN | GLN | . | 42 | 42 | . | 6.478  | 25.875 | 11.509 | 1.00 | 50.00 | . |
| ATOM | 284 | O   | O   | . | GLN | GLN | . | 42 | 42 | . | 5.955  | 25.248 | 10.585 | 1.00 | 50.00 | . |
| ATOM | 285 | CB  | CB  | . | GLN | GLN | . | 42 | 42 | . | 8.920  | 25.242 | 11.456 | 1.00 | 50.00 | . |
| ATOM | 286 | CG  | CG  | . | GLN | GLN | . | 42 | 42 | . | 9.473  | 26.646 | 11.221 | 1.00 | 50.00 | . |
| ATOM | 287 | CD  | CD  | . | GLN | GLN | . | 42 | 42 | . | 10.772 | 26.607 | 10.412 | 1.00 | 50.00 | . |
| ATOM | 288 | OE1 | OE1 | . | GLN | GLN | . | 42 | 42 | . | 10.855 | 26.933 | 9.232  | 1.00 | 50.00 | . |
| ATOM | 289 | NE2 | NE2 | . | GLN | GLN | . | 42 | 42 | . | 11.837 | 26.191 | 11.063 | 1.00 | 50.00 | . |
| ATOM | 290 | N   | N   | . | SER | SER | . | 43 | 43 | . | 6.022  | 27.030 | 11.983 | 1.00 | 50.00 | . |
| ATOM | 291 | CA  | CA  | . | SER | SER | . | 43 | 43 | . | 4.886  | 27.753 | 11.382 | 1.00 | 50.00 | . |
| ATOM | 292 | C   | C   | . | SER | SER | . | 43 | 43 | . | 5.217  | 28.355 | 10.009 | 1.00 | 50.00 | . |
| ATOM | 293 | O   | O   | . | SER | SER | . | 43 | 43 | . | 6.379  | 28.551 | 9.655  | 1.00 | 50.00 | . |
| ATOM | 294 | CB  | CB  | . | SER | SER | . | 43 | 43 | . | 4.394  | 28.864 | 12.314 | 1.00 | 50.00 | . |
| ATOM | 295 | OG  | OG  | . | SER | SER | . | 43 | 43 | . | 5.343  | 29.929 | 12.408 | 1.00 | 50.00 | . |
| ATOM | 296 | N   | N   | . | VAL | VAL | . | 44 | 44 | . | 4.153  | 28.556 | 9.240  | 1.00 | 50.00 | . |
| ATOM | 297 | CA  | CA  | . | VAL | VAL | . | 44 | 44 | . | 4.206  | 29.235 | 7.930  | 1.00 | 50.00 | . |
| ATOM | 298 | C   | C   | . | VAL | VAL | . | 44 | 44 | . | 3.184  | 30.377 | 7.966  | 1.00 | 50.00 | . |
| ATOM | 299 | O   | O   | . | VAL | VAL | . | 44 | 44 | . | 2.032  | 30.189 | 8.363  | 1.00 | 50.00 | . |
| ATOM | 300 | CB  | CB  | . | VAL | VAL | . | 44 | 44 | . | 3.871  | 28.252 | 6.792  | 1.00 | 50.00 | . |
| ATOM | 301 | CG1 | CG1 | . | VAL | VAL | . | 44 | 44 | . | 3.835  | 28.932 | 5.420  | 1.00 | 50.00 | . |
| ATOM | 302 | CG2 | CG2 | . | VAL | VAL | . | 44 | 44 | . | 4.917  | 27.143 | 6.709  | 1.00 | 50.00 | . |
| ATOM | 303 | N   | N   | . | THR | THR | . | 45 | 45 | . | 3.637  | 31.546 | 7.542  | 1.00 | 50.00 | . |
| ATOM | 304 | CA  | CA  | . | THR | THR | . | 45 | 45 | . | 2.775  | 32.738 | 7.498  | 1.00 | 50.00 | . |
| ATOM | 305 | C   | C   | . | THR | THR | . | 45 | 45 | . | 2.911  | 33.439 | 6.139  | 1.00 | 50.00 | . |
| ATOM | 306 | O   | O   | . | THR | THR | . | 45 | 45 | . | 3.518  | 32.930 | 5.196  | 1.00 | 50.00 | . |
| ATOM | 307 | CB  | CB  | . | THR | THR | . | 45 | 45 | . | 3.130  | 33.721 | 8.630  | 1.00 | 50.00 | . |
| ATOM | 308 | OG1 | OG1 | . | THR | THR | . | 45 | 45 | . | 4.403  | 34.303 | 8.346  | 1.00 | 50.00 | . |
| ATOM | 309 | CG2 | CG2 | . | THR | THR | . | 45 | 45 | . | 3.110  | 33.073 | 10.020 | 1.00 | 50.00 | . |
| ATOM | 310 | N   | N   | . | GLY | GLY | . | 46 | 46 | . | 2.187  | 34.551 | 6.048  | 1.00 | 50.00 | . |
| ATOM | 311 | CA  | CA  | . | GLY | GLY | . | 46 | 46 | . | 2.352  | 35.515 | 4.960  | 1.00 | 50.00 | . |
| ATOM | 312 | C   | C   | . | GLY | GLY | . | 46 | 46 | . | 2.692  | 36.841 | 5.639  | 1.00 | 50.00 | . |
| ATOM | 313 | O   | O   | . | GLY | GLY | . | 46 | 46 | . | 1.915  | 37.306 | 6.476  | 1.00 | 50.00 | . |
| ATOM | 314 | N   | N   | . | VAL | VAL | . | 47 | 47 | . | 3.677  | 37.531 | 5.077  | 1.00 | 50.00 | . |
| ATOM | 315 | CA  | CA  | . | VAL | VAL | . | 47 | 47 | . | 4.118  | 38.851 | 5.589  | 1.00 | 50.00 | . |

|      |     |     |     |   |     |     |   |    |    |   |        |        |        |      |       |   |
|------|-----|-----|-----|---|-----|-----|---|----|----|---|--------|--------|--------|------|-------|---|
| ATOM | 316 | C   | C   | . | VAL | VAL | . | 47 | 47 | . | 3.891  | 40.014 | 4.607  | 1.00 | 50.00 | . |
| ATOM | 317 | O   | O   | . | VAL | VAL | . | 47 | 47 | . | 4.162  | 39.903 | 3.409  | 1.00 | 50.00 | . |
| ATOM | 318 | CB  | CB  | . | VAL | VAL | . | 47 | 47 | . | 5.591  | 38.804 | 6.019  | 1.00 | 50.00 | . |
| ATOM | 319 | CG1 | CG1 | . | VAL | VAL | . | 47 | 47 | . | 5.767  | 37.833 | 7.189  | 1.00 | 50.00 | . |
| ATOM | 320 | CG2 | CG2 | . | VAL | VAL | . | 47 | 47 | . | 6.537  | 38.449 | 4.862  | 1.00 | 50.00 | . |
| ATOM | 321 | N   | N   | . | GLU | GLU | . | 48 | 48 | . | 3.391  | 41.119 | 5.154  | 1.00 | 50.00 | . |
| ATOM | 322 | CA  | CA  | . | GLU | GLU | . | 48 | 48 | . | 3.235  | 42.389 | 4.419  | 1.00 | 50.00 | . |
| ATOM | 323 | C   | C   | . | GLU | GLU | . | 48 | 48 | . | 4.522  | 43.217 | 4.592  | 1.00 | 50.00 | . |
| ATOM | 324 | O   | O   | . | GLU | GLU | . | 48 | 48 | . | 4.538  | 44.320 | 5.136  | 1.00 | 50.00 | . |
| ATOM | 325 | CB  | CB  | . | GLU | GLU | . | 48 | 48 | . | 1.988  | 43.116 | 4.947  | 1.00 | 50.00 | . |
| ATOM | 326 | CG  | CG  | . | GLU | GLU | . | 48 | 48 | . | 1.610  | 44.362 | 4.127  | 1.00 | 50.00 | . |
| ATOM | 327 | CD  | CD  | . | GLU | GLU | . | 48 | 48 | . | 1.307  | 44.090 | 2.646  | 1.00 | 50.00 | . |
| ATOM | 328 | OE1 | OE1 | . | GLU | GLU | . | 48 | 48 | . | 1.077  | 42.911 | 2.288  | 1.00 | 50.00 | . |
| ATOM | 329 | OE2 | OE2 | . | GLU | GLU | . | 48 | 48 | . | 1.361  | 45.077 | 1.882  | 1.00 | 50.00 | . |
| ATOM | 330 | N   | N   | . | ALA | ALA | . | 49 | 49 | . | 5.626  | 42.550 | 4.275  | 1.00 | 50.00 | . |
| ATOM | 331 | CA  | CA  | . | ALA | ALA | . | 49 | 49 | . | 6.981  | 43.098 | 4.444  | 1.00 | 50.00 | . |
| ATOM | 332 | C   | C   | . | ALA | ALA | . | 49 | 49 | . | 7.855  | 42.639 | 3.275  | 1.00 | 50.00 | . |
| ATOM | 333 | O   | O   | . | ALA | ALA | . | 49 | 49 | . | 8.368  | 41.518 | 3.257  | 1.00 | 50.00 | . |
| ATOM | 334 | CB  | CB  | . | ALA | ALA | . | 49 | 49 | . | 7.553  | 42.645 | 5.794  | 1.00 | 50.00 | . |
| ATOM | 335 | N   | N   | . | SER | SER | . | 50 | 50 | . | 7.866  | 43.485 | 2.245  | 1.00 | 50.00 | . |
| ATOM | 336 | CA  | CA  | . | SER | SER | . | 50 | 50 | . | 8.617  | 43.241 | 0.994  | 1.00 | 50.00 | . |
| ATOM | 337 | C   | C   | . | SER | SER | . | 50 | 50 | . | 10.072 | 42.841 | 1.273  | 1.00 | 50.00 | . |
| ATOM | 338 | O   | O   | . | SER | SER | . | 50 | 50 | . | 10.585 | 43.052 | 2.370  | 1.00 | 50.00 | . |
| ATOM | 339 | CB  | CB  | . | SER | SER | . | 50 | 50 | . | 8.618  | 44.498 | 0.115  | 1.00 | 50.00 | . |
| ATOM | 340 | OG  | OG  | . | SER | SER | . | 50 | 50 | . | 9.337  | 44.266 | -1.104 | 1.00 | 50.00 | . |
| ATOM | 341 | N   | N   | . | ASP | ASP | . | 51 | 51 | . | 10.660 | 42.186 | 0.275  | 1.00 | 50.00 | . |
| ATOM | 342 | CA  | CA  | . | ASP | ASP | . | 51 | 51 | . | 12.078 | 41.784 | 0.238  | 1.00 | 50.00 | . |
| ATOM | 343 | C   | C   | . | ASP | ASP | . | 51 | 51 | . | 12.651 | 41.376 | 1.606  | 1.00 | 50.00 | . |
| ATOM | 344 | O   | O   | . | ASP | ASP | . | 51 | 51 | . | 13.165 | 42.186 | 2.375  | 1.00 | 50.00 | . |
| ATOM | 345 | CB  | CB  | . | ASP | ASP | . | 51 | 51 | . | 12.910 | 42.914 | -0.390 | 1.00 | 50.00 | . |
| ATOM | 346 | CG  | CG  | . | ASP | ASP | . | 51 | 51 | . | 13.852 | 42.410 | -1.488 | 1.00 | 50.00 | . |
| ATOM | 347 | OD1 | OD1 | . | ASP | ASP | . | 51 | 51 | . | 13.880 | 41.179 | -1.687 | 1.00 | 50.00 | . |
| ATOM | 348 | OD2 | OD2 | . | ASP | ASP | . | 51 | 51 | . | 14.528 | 43.254 | -2.107 | 1.00 | 50.00 | . |
| ATOM | 349 | N   | N   | . | ASP | ASP | . | 52 | 52 | . | 12.462 | 40.102 | 1.911  | 1.00 | 50.00 | . |
| ATOM | 350 | CA  | CA  | . | ASP | ASP | . | 52 | 52 | . | 12.995 | 39.503 | 3.143  | 1.00 | 50.00 | . |
| ATOM | 351 | C   | C   | . | ASP | ASP | . | 52 | 52 | . | 13.523 | 38.114 | 2.775  | 1.00 | 50.00 | . |
| ATOM | 352 | O   | O   | . | ASP | ASP | . | 52 | 52 | . | 12.781 | 37.322 | 2.203  | 1.00 | 50.00 | . |
| ATOM | 353 | CB  | CB  | . | ASP | ASP | . | 52 | 52 | . | 11.877 | 39.410 | 4.197  | 1.00 | 50.00 | . |
| ATOM | 354 | CG  | CG  | . | ASP | ASP | . | 52 | 52 | . | 12.363 | 38.970 | 5.587  | 1.00 | 50.00 | . |
| ATOM | 355 | OD1 | OD1 | . | ASP | ASP | . | 52 | 52 | . | 13.506 | 38.464 | 5.690  | 1.00 | 50.00 | . |
| ATOM | 356 | OD2 | OD2 | . | ASP | ASP | . | 52 | 52 | . | 11.534 | 38.980 | 6.520  | 1.00 | 50.00 | . |
| ATOM | 357 | N   | N   | . | ALA | ALA | . | 53 | 53 | . | 14.722 | 37.796 | 3.251  | 1.00 | 50.00 | . |
| ATOM | 358 | CA  | CA  | . | ALA | ALA | . | 53 | 53 | . | 15.370 | 36.487 | 3.013  | 1.00 | 50.00 | . |
| ATOM | 359 | C   | C   | . | ALA | ALA | . | 53 | 53 | . | 14.522 | 35.286 | 3.469  | 1.00 | 50.00 | . |
| ATOM | 360 | O   | O   | . | ALA | ALA | . | 53 | 53 | . | 14.436 | 34.284 | 2.762  | 1.00 | 50.00 | . |
| ATOM | 361 | CB  | CB  | . | ALA | ALA | . | 53 | 53 | . | 16.723 | 36.449 | 3.725  | 1.00 | 50.00 | . |
| ATOM | 362 | N   | N   | . | ASN | ASN | . | 54 | 54 | . | 13.787 | 35.470 | 4.567  | 1.00 | 50.00 | . |
| ATOM | 363 | CA  | CA  | . | ASN | ASN | . | 54 | 54 | . | 12.849 | 34.454 | 5.093  | 1.00 | 50.00 | . |
| ATOM | 364 | C   | C   | . | ASN | ASN | . | 54 | 54 | . | 11.577 | 34.253 | 4.245  | 1.00 | 50.00 | . |
| ATOM | 365 | O   | O   | . | ASN | ASN | . | 54 | 54 | . | 10.696 | 33.468 | 4.580  | 1.00 | 50.00 | . |
| ATOM | 366 | CB  | CB  | . | ASN | ASN | . | 54 | 54 | . | 12.460 | 34.810 | 6.527  | 1.00 | 50.00 | . |
| ATOM | 367 | CG  | CG  | . | ASN | ASN | . | 54 | 54 | . | 13.634 | 34.683 | 7.490  | 1.00 | 50.00 | . |
| ATOM | 368 | OD1 | OD1 | . | ASN | ASN | . | 54 | 54 | . | 14.278 | 33.654 | 7.604  | 1.00 | 50.00 | . |
| ATOM | 369 | ND2 | ND2 | . | ASN | ASN | . | 54 | 54 | . | 13.913 | 35.749 | 8.208  | 1.00 | 50.00 | . |
| ATOM | 370 | N   | N   | . | SER | SER | . | 55 | 55 | . | 11.456 | 35.029 | 3.173  | 1.00 | 50.00 | . |
| ATOM | 371 | CA  | CA  | . | SER | SER | . | 55 | 55 | . | 10.308 | 34.917 | 2.251  | 1.00 | 50.00 | . |
| ATOM | 372 | C   | C   | . | SER | SER | . | 55 | 55 | . | 10.687 | 34.221 | 0.932  | 1.00 | 50.00 | . |

|      |     |     |     |   |     |     |   |   |    |    |   |        |        |        |      |       |   |
|------|-----|-----|-----|---|-----|-----|---|---|----|----|---|--------|--------|--------|------|-------|---|
| ATOM | 373 | O   | O   | . | SER | SER | . | . | 55 | 55 | . | 9.943  | 34.269 | -0.048 | 1.00 | 50.00 | . |
| ATOM | 374 | CB  | CB  | . | SER | SER | . | . | 55 | 55 | . | 9.731  | 36.308 | 1.948  | 1.00 | 50.00 | . |
| ATOM | 375 | OG  | OG  | . | SER | SER | . | . | 55 | 55 | . | 9.327  | 36.967 | 3.152  | 1.00 | 50.00 | . |
| ATOM | 376 | N   | N   | . | TYR | TYR | . | . | 56 | 56 | . | 11.871 | 33.604 | 0.908  | 1.00 | 50.00 | . |
| ATOM | 377 | CA  | CA  | . | TYR | TYR | . | . | 56 | 56 | . | 12.404 | 32.986 | -0.317 | 1.00 | 50.00 | . |
| ATOM | 378 | C   | C   | . | TYR | TYR | . | . | 56 | 56 | . | 12.255 | 31.473 | -0.212 | 1.00 | 50.00 | . |
| ATOM | 379 | O   | O   | . | TYR | TYR | . | . | 56 | 56 | . | 12.575 | 30.851 | 0.804  | 1.00 | 50.00 | . |
| ATOM | 380 | CB  | CB  | . | TYR | TYR | . | . | 56 | 56 | . | 13.877 | 33.354 | -0.547 | 1.00 | 50.00 | . |
| ATOM | 381 | CG  | CG  | . | TYR | TYR | . | . | 56 | 56 | . | 14.147 | 34.828 | -0.880 | 1.00 | 50.00 | . |
| ATOM | 382 | CD1 | CD1 | . | TYR | TYR | . | . | 56 | 56 | . | 13.377 | 35.854 | -0.345 | 1.00 | 50.00 | . |
| ATOM | 383 | CD2 | CD2 | . | TYR | TYR | . | . | 56 | 56 | . | 15.207 | 35.155 | -1.718 | 1.00 | 50.00 | . |
| ATOM | 384 | CE1 | CE1 | . | TYR | TYR | . | . | 56 | 56 | . | 13.638 | 37.174 | -0.622 | 1.00 | 50.00 | . |
| ATOM | 385 | CE2 | CE2 | . | TYR | TYR | . | . | 56 | 56 | . | 15.473 | 36.486 | -2.006 | 1.00 | 50.00 | . |
| ATOM | 386 | CZ  | CZ  | . | TYR | TYR | . | . | 56 | 56 | . | 14.689 | 37.488 | -1.458 | 1.00 | 50.00 | . |
| ATOM | 387 | OH  | OH  | . | TYR | TYR | . | . | 56 | 56 | . | 14.943 | 38.775 | -1.763 | 1.00 | 50.00 | . |
| ATOM | 388 | N   | N   | . | TRP | TRP | . | . | 57 | 57 | . | 11.713 | 30.941 | -1.294 | 1.00 | 50.00 | . |
| ATOM | 389 | CA  | CA  | . | TRP | TRP | . | . | 57 | 57 | . | 11.451 | 29.502 | -1.425 | 1.00 | 50.00 | . |
| ATOM | 390 | C   | C   | . | TRP | TRP | . | . | 57 | 57 | . | 12.102 | 29.006 | -2.716 | 1.00 | 50.00 | . |
| ATOM | 391 | O   | O   | . | TRP | TRP | . | . | 57 | 57 | . | 12.174 | 29.736 | -3.707 | 1.00 | 50.00 | . |
| ATOM | 392 | CB  | CB  | . | TRP | TRP | . | . | 57 | 57 | . | 9.939  | 29.249 | -1.474 | 1.00 | 50.00 | . |
| ATOM | 393 | CG  | CG  | . | TRP | TRP | . | . | 57 | 57 | . | 9.211  | 29.784 | -0.236 | 1.00 | 50.00 | . |
| ATOM | 394 | CD1 | CD1 | . | TRP | TRP | . | . | 57 | 57 | . | 8.822  | 31.044 | -0.046 | 1.00 | 50.00 | . |
| ATOM | 395 | CD2 | CD2 | . | TRP | TRP | . | . | 57 | 57 | . | 8.852  | 29.065 | 0.894  | 1.00 | 50.00 | . |
| ATOM | 396 | NE1 | NE1 | . | TRP | TRP | . | . | 57 | 57 | . | 8.231  | 31.156 | 1.143  | 1.00 | 50.00 | . |
| ATOM | 397 | CE2 | CE2 | . | TRP | TRP | . | . | 57 | 57 | . | 8.227  | 29.967 | 1.743  | 1.00 | 50.00 | . |
| ATOM | 398 | CE3 | CE3 | . | TRP | TRP | . | . | 57 | 57 | . | 8.952  | 27.723 | 1.239  | 1.00 | 50.00 | . |
| ATOM | 399 | CZ2 | CZ2 | . | TRP | TRP | . | . | 57 | 57 | . | 7.692  | 29.523 | 2.947  | 1.00 | 50.00 | . |
| ATOM | 400 | CZ3 | CZ3 | . | TRP | TRP | . | . | 57 | 57 | . | 8.405  | 27.277 | 2.436  | 1.00 | 50.00 | . |
| ATOM | 401 | CH2 | CH2 | . | TRP | TRP | . | . | 57 | 57 | . | 7.774  | 28.178 | 3.289  | 1.00 | 50.00 | . |
| ATOM | 402 | N   | N   | . | ARG | ARG | . | . | 58 | 58 | . | 12.596 | 27.778 | -2.657 | 1.00 | 50.00 | . |
| ATOM | 403 | CA  | CA  | . | ARG | ARG | . | . | 58 | 58 | . | 13.191 | 27.125 | -3.829 | 1.00 | 50.00 | . |
| ATOM | 404 | C   | C   | . | ARG | ARG | . | . | 58 | 58 | . | 12.311 | 25.954 | -4.272 | 1.00 | 50.00 | . |
| ATOM | 405 | O   | O   | . | ARG | ARG | . | . | 58 | 58 | . | 11.918 | 25.083 | -3.494 | 1.00 | 50.00 | . |
| ATOM | 406 | CB  | CB  | . | ARG | ARG | . | . | 58 | 58 | . | 14.614 | 26.675 | -3.497 | 1.00 | 50.00 | . |
| ATOM | 407 | CG  | CG  | . | ARG | ARG | . | . | 58 | 58 | . | 15.310 | 25.964 | -4.660 | 1.00 | 50.00 | . |
| ATOM | 408 | CD  | CD  | . | ARG | ARG | . | . | 58 | 58 | . | 16.678 | 25.430 | -4.228 | 1.00 | 50.00 | . |
| ATOM | 409 | NE  | NE  | . | ARG | ARG | . | . | 58 | 58 | . | 17.577 | 26.536 | -3.846 | 1.00 | 50.00 | . |
| ATOM | 410 | CZ  | CZ  | . | ARG | ARG | . | . | 58 | 58 | . | 18.301 | 27.291 | -4.677 | 1.00 | 50.00 | . |
| ATOM | 411 | NH1 | NH1 | . | ARG | ARG | . | . | 58 | 58 | . | 18.260 | 27.106 | -5.985 | 1.00 | 50.00 | . |
| ATOM | 412 | NH2 | NH2 | . | ARG | ARG | . | . | 58 | 58 | . | 19.030 | 28.295 | -4.215 | 1.00 | 50.00 | . |
| ATOM | 413 | N   | N   | . | ILE | ILE | . | . | 59 | 59 | . | 11.974 | 26.014 | -5.550 | 1.00 | 50.00 | . |
| ATOM | 414 | CA  | CA  | . | ILE | ILE | . | . | 59 | 59 | . | 11.165 | 24.973 | -6.208 | 1.00 | 50.00 | . |
| ATOM | 415 | C   | C   | . | ILE | ILE | . | . | 59 | 59 | . | 12.006 | 23.704 | -6.370 | 1.00 | 50.00 | . |
| ATOM | 416 | O   | O   | . | ILE | ILE | . | . | 59 | 59 | . | 13.046 | 23.710 | -7.014 | 1.00 | 50.00 | . |
| ATOM | 417 | CB  | CB  | . | ILE | ILE | . | . | 59 | 59 | . | 10.675 | 25.514 | -7.557 | 1.00 | 50.00 | . |
| ATOM | 418 | CG1 | CG1 | . | ILE | ILE | . | . | 59 | 59 | . | 9.784  | 26.725 | -7.266 | 1.00 | 50.00 | . |
| ATOM | 419 | CG2 | CG2 | . | ILE | ILE | . | . | 59 | 59 | . | 9.969  | 24.454 | -8.417 | 1.00 | 50.00 | . |
| ATOM | 420 | CD1 | CD1 | . | ILE | ILE | . | . | 59 | 59 | . | 9.309  | 27.433 | -8.518 | 1.00 | 50.00 | . |
| ATOM | 421 | N   | N   | . | ARG | ARG | . | . | 60 | 60 | . | 11.461 | 22.607 | -5.884 | 1.00 | 50.00 | . |
| ATOM | 422 | CA  | CA  | . | ARG | ARG | . | . | 60 | 60 | . | 12.085 | 21.284 | -6.039 | 1.00 | 50.00 | . |
| ATOM | 423 | C   | C   | . | ARG | ARG | . | . | 60 | 60 | . | 11.138 | 20.338 | -6.760 | 1.00 | 50.00 | . |
| ATOM | 424 | O   | O   | . | ARG | ARG | . | . | 60 | 60 | . | 9.922  | 20.448 | -6.606 | 1.00 | 50.00 | . |
| ATOM | 425 | CB  | CB  | . | ARG | ARG | . | . | 60 | 60 | . | 12.385 | 20.696 | -4.670 | 1.00 | 50.00 | . |
| ATOM | 426 | CG  | CG  | . | ARG | ARG | . | . | 60 | 60 | . | 13.475 | 21.491 | -3.966 | 1.00 | 50.00 | . |
| ATOM | 427 | CD  | CD  | . | ARG | ARG | . | . | 60 | 60 | . | 13.681 | 20.847 | -2.605 | 1.00 | 50.00 | . |
| ATOM | 428 | NE  | NE  | . | ARG | ARG | . | . | 60 | 60 | . | 14.294 | 19.516 | -2.670 | 1.00 | 50.00 | . |
| ATOM | 429 | CZ  | CZ  | . | ARG | ARG | . | . | 60 | 60 | . | 15.596 | 19.267 | -2.810 | 1.00 | 50.00 | . |

|      |     |     |     |       |     |     |    |    |          |        |         |      |       |   |
|------|-----|-----|-----|-------|-----|-----|----|----|----------|--------|---------|------|-------|---|
| ATOM | 430 | NH1 | NH1 | . ARG | ARG | . . | 60 | 60 | . 16.498 | 20.239 | -2.885  | 1.00 | 50.00 | . |
| ATOM | 431 | NH2 | NH2 | . ARG | ARG | . . | 60 | 60 | . 16.001 | 18.008 | -2.872  | 1.00 | 50.00 | . |
| ATOM | 432 | N   | N   | . GLY | GLY | . . | 61 | 61 | . 11.706 | 19.324 | -7.421  | 1.00 | 50.00 | . |
| ATOM | 433 | CA  | CA  | . GLY | GLY | . . | 61 | 61 | . 10.887 | 18.281 | -8.068  | 1.00 | 50.00 | . |
| ATOM | 434 | C   | C   | . GLY | GLY | . . | 61 | 61 | . 10.036 | 17.565 | -7.006  | 1.00 | 50.00 | . |
| ATOM | 435 | O   | O   | . GLY | GLY | . . | 61 | 61 | . 10.364 | 17.602 | -5.818  | 1.00 | 50.00 | . |
| ATOM | 436 | N   | N   | . GLY | GLY | . . | 62 | 62 | . 8.918  | 16.972 | -7.444  | 1.00 | 50.00 | . |
| ATOM | 437 | CA  | CA  | . GLY | GLY | . . | 62 | 62 | . 8.080  | 16.133 | -6.558  | 1.00 | 50.00 | . |
| ATOM | 438 | C   | C   | . GLY | GLY | . . | 62 | 62 | . 8.964  | 15.105 | -5.829  | 1.00 | 50.00 | . |
| ATOM | 439 | O   | O   | . GLY | GLY | . . | 62 | 62 | . 10.024 | 14.733 | -6.331  | 1.00 | 50.00 | . |
| ATOM | 440 | N   | N   | . SER | SER | . . | 63 | 63 | . 8.504  | 14.639 | -4.670  | 1.00 | 50.00 | . |
| ATOM | 441 | CA  | CA  | . SER | SER | . . | 63 | 63 | . 9.281  | 13.690 | -3.829  | 1.00 | 50.00 | . |
| ATOM | 442 | C   | C   | . SER | SER | . . | 63 | 63 | . 9.829  | 12.487 | -4.608  | 1.00 | 50.00 | . |
| ATOM | 443 | O   | O   | . SER | SER | . . | 63 | 63 | . 11.006 | 12.160 | -4.504  | 1.00 | 50.00 | . |
| ATOM | 444 | CB  | CB  | . SER | SER | . . | 63 | 63 | . 8.428  | 13.131 | -2.692  | 1.00 | 50.00 | . |
| ATOM | 445 | OG  | OG  | . SER | SER | . . | 63 | 63 | . 9.113  | 12.205 | -1.860  | 1.00 | 50.00 | . |
| ATOM | 446 | N   | N   | . GLU | GLU | . . | 64 | 64 | . 8.979  | 11.921 | -5.463  | 1.00 | 50.00 | . |
| ATOM | 447 | CA  | CA  | . GLU | GLU | . . | 64 | 64 | . 9.344  | 10.764 | -6.300  | 1.00 | 50.00 | . |
| ATOM | 448 | C   | C   | . GLU | GLU | . . | 64 | 64 | . 9.665  | 11.135 | -7.758  | 1.00 | 50.00 | . |
| ATOM | 449 | O   | O   | . GLU | GLU | . . | 64 | 64 | . 9.519  | 10.324 | -8.672  | 1.00 | 50.00 | . |
| ATOM | 450 | CB  | CB  | . GLU | GLU | . . | 64 | 64 | . 8.206  | 9.738  | -6.232  | 1.00 | 50.00 | . |
| ATOM | 451 | CG  | CG  | . GLU | GLU | . . | 64 | 64 | . 8.103  | 9.075  | -4.853  | 1.00 | 50.00 | . |
| ATOM | 452 | CD  | CD  | . GLU | GLU | . . | 64 | 64 | . 9.307  | 8.207  | -4.454  | 1.00 | 50.00 | . |
| ATOM | 453 | OE1 | OE1 | . GLU | GLU | . . | 64 | 64 | . 10.252 | 8.054  | -5.260  | 1.00 | 50.00 | . |
| ATOM | 454 | OE2 | OE2 | . GLU | GLU | . . | 64 | 64 | . 9.221  | 7.657  | -3.335  | 1.00 | 50.00 | . |
| ATOM | 455 | N   | N   | . GLY | GLY | . . | 65 | 65 | . 10.077 | 12.393 | -7.943  | 1.00 | 50.00 | . |
| ATOM | 456 | CA  | CA  | . GLY | GLY | . . | 65 | 65 | . 10.452 | 12.931 | -9.259  | 1.00 | 50.00 | . |
| ATOM | 457 | C   | C   | . GLY | GLY | . . | 65 | 65 | . 11.892 | 13.451 | -9.233  | 1.00 | 50.00 | . |
| ATOM | 458 | O   | O   | . GLY | GLY | . . | 65 | 65 | . 12.557 | 13.479 | -8.198  | 1.00 | 50.00 | . |
| ATOM | 459 | N   | N   | . GLY | GLY | . . | 66 | 66 | . 12.321 | 13.889 | -10.415 | 1.00 | 50.00 | . |
| ATOM | 460 | CA  | CA  | . GLY | GLY | . . | 66 | 66 | . 13.648 | 14.495 | -10.612 | 1.00 | 50.00 | . |
| ATOM | 461 | C   | C   | . GLY | GLY | . . | 66 | 66 | . 13.561 | 15.508 | -11.754 | 1.00 | 50.00 | . |
| ATOM | 462 | O   | O   | . GLY | GLY | . . | 66 | 66 | . 12.724 | 15.376 | -12.647 | 1.00 | 50.00 | . |
| ATOM | 463 | N   | N   | . CYS | CYS | . . | 67 | 67 | . 14.369 | 16.551 | -11.635 | 1.00 | 50.00 | . |
| ATOM | 464 | CA  | CA  | . CYS | CYS | . . | 67 | 67 | . 14.416 | 17.628 | -12.636 | 1.00 | 50.00 | . |
| ATOM | 465 | C   | C   | . CYS | CYS | . . | 67 | 67 | . 15.846 | 18.181 | -12.751 | 1.00 | 50.00 | . |
| ATOM | 466 | O   | O   | . CYS | CYS | . . | 67 | 67 | . 16.621 | 18.070 | -11.796 | 1.00 | 50.00 | . |
| ATOM | 467 | CB  | CB  | . CYS | CYS | . . | 67 | 67 | . 13.467 | 18.760 | -12.225 | 1.00 | 50.00 | . |
| ATOM | 468 | SG  | SG  | . CYS | CYS | . . | 67 | 67 | . 14.093 | 19.714 | -10.792 | 1.00 | 50.00 | . |
| ATOM | 469 | N   | N   | . PRO | PRO | . . | 68 | 68 | . 16.181 | 18.724 | -13.920 | 1.00 | 50.00 | . |
| ATOM | 470 | CA  | CA  | . PRO | PRO | . . | 68 | 68 | . 17.378 | 19.566 | -14.049 | 1.00 | 50.00 | . |
| ATOM | 471 | C   | C   | . PRO | PRO | . . | 68 | 68 | . 17.010 | 21.044 | -13.878 | 1.00 | 50.00 | . |
| ATOM | 472 | O   | O   | . PRO | PRO | . . | 68 | 68 | . 15.973 | 21.536 | -14.308 | 1.00 | 50.00 | . |
| ATOM | 473 | CB  | CB  | . PRO | PRO | . . | 68 | 68 | . 17.926 | 19.238 | -15.440 | 1.00 | 50.00 | . |
| ATOM | 474 | CG  | CG  | . PRO | PRO | . . | 68 | 68 | . 16.704 | 18.813 | -16.252 | 1.00 | 50.00 | . |
| ATOM | 475 | CD  | CD  | . PRO | PRO | . . | 68 | 68 | . 15.729 | 18.220 | -15.229 | 1.00 | 50.00 | . |
| ATOM | 476 | N   | N   | . ARG | ARG | . . | 69 | 69 | . 17.853 | 21.748 | -13.143 | 1.00 | 50.00 | . |
| ATOM | 477 | CA  | CA  | . ARG | ARG | . . | 69 | 69 | . 17.799 | 23.220 | -12.996 | 1.00 | 50.00 | . |
| ATOM | 478 | C   | C   | . ARG | ARG | . . | 69 | 69 | . 17.640 | 23.913 | -14.361 | 1.00 | 50.00 | . |
| ATOM | 479 | O   | O   | . ARG | ARG | . . | 69 | 69 | . 18.279 | 23.533 | -15.343 | 1.00 | 50.00 | . |
| ATOM | 480 | CB  | CB  | . ARG | ARG | . . | 69 | 69 | . 19.068 | 23.757 | -12.305 | 1.00 | 50.00 | . |
| ATOM | 481 | CG  | CG  | . ARG | ARG | . . | 69 | 69 | . 20.250 | 22.776 | -12.182 | 1.00 | 50.00 | . |
| ATOM | 482 | CD  | CD  | . ARG | ARG | . . | 69 | 69 | . 20.762 | 22.299 | -13.545 | 1.00 | 50.00 | . |
| ATOM | 483 | NE  | NE  | . ARG | ARG | . . | 69 | 69 | . 21.464 | 21.013 | -13.412 | 1.00 | 50.00 | . |
| ATOM | 484 | CZ  | CZ  | . ARG | ARG | . . | 69 | 69 | . 21.971 | 20.309 | -14.426 | 1.00 | 50.00 | . |
| ATOM | 485 | NH1 | NH1 | . ARG | ARG | . . | 69 | 69 | . 21.849 | 20.724 | -15.682 | 1.00 | 50.00 | . |
| ATOM | 486 | NH2 | NH2 | . ARG | ARG | . . | 69 | 69 | . 22.618 | 19.177 | -14.191 | 1.00 | 50.00 | . |

|      |     |     |     |   |     |     |   |   |    |    |   |        |        |         |      |       |   |
|------|-----|-----|-----|---|-----|-----|---|---|----|----|---|--------|--------|---------|------|-------|---|
| ATOM | 487 | N   | N   | . | GLY | GLY | . | . | 70 | 70 | . | 16.653 | 24.813 | -14.414 | 1.00 | 50.00 | . |
| ATOM | 488 | CA  | CA  | . | GLY | GLY | . | . | 70 | 70 | . | 16.290 | 25.482 | -15.680 | 1.00 | 50.00 | . |
| ATOM | 489 | C   | C   | . | GLY | GLY | . | . | 70 | 70 | . | 15.086 | 24.821 | -16.371 | 1.00 | 50.00 | . |
| ATOM | 490 | O   | O   | . | GLY | GLY | . | . | 70 | 70 | . | 14.468 | 25.420 | -17.248 | 1.00 | 50.00 | . |
| ATOM | 491 | N   | N   | . | SER | SER | . | . | 71 | 71 | . | 14.750 | 23.600 | -15.955 | 1.00 | 50.00 | . |
| ATOM | 492 | CA  | CA  | . | SER | SER | . | . | 71 | 71 | . | 13.591 | 22.880 | -16.509 | 1.00 | 50.00 | . |
| ATOM | 493 | C   | C   | . | SER | SER | . | . | 71 | 71 | . | 12.291 | 23.616 | -16.215 | 1.00 | 50.00 | . |
| ATOM | 494 | O   | O   | . | SER | SER | . | . | 71 | 71 | . | 12.059 | 23.981 | -15.062 | 1.00 | 50.00 | . |
| ATOM | 495 | CB  | CB  | . | SER | SER | . | . | 71 | 71 | . | 13.436 | 21.477 | -15.943 | 1.00 | 50.00 | . |
| ATOM | 496 | OG  | OG  | . | SER | SER | . | . | 71 | 71 | . | 14.491 | 20.718 | -16.507 | 1.00 | 50.00 | . |
| ATOM | 497 | N   | N   | . | PRO | PRO | . | . | 72 | 72 | . | 11.477 | 23.821 | -17.251 | 1.00 | 50.00 | . |
| ATOM | 498 | CA  | CA  | . | PRO | PRO | . | . | 72 | 72 | . | 10.151 | 24.425 | -17.090 | 1.00 | 50.00 | . |
| ATOM | 499 | C   | C   | . | PRO | PRO | . | . | 72 | 72 | . | 9.266  | 23.446 | -16.315 | 1.00 | 50.00 | . |
| ATOM | 500 | O   | O   | . | PRO | PRO | . | . | 72 | 72 | . | 9.394  | 22.227 | -16.416 | 1.00 | 50.00 | . |
| ATOM | 501 | CB  | CB  | . | PRO | PRO | . | . | 72 | 72 | . | 9.656  | 24.622 | -18.521 | 1.00 | 50.00 | . |
| ATOM | 502 | CG  | CG  | . | PRO | PRO | . | . | 72 | 72 | . | 10.312 | 23.476 | -19.290 | 1.00 | 50.00 | . |
| ATOM | 503 | CD  | CD  | . | PRO | PRO | . | . | 72 | 72 | . | 11.694 | 23.380 | -18.646 | 1.00 | 50.00 | . |
| ATOM | 504 | N   | N   | . | VAL | VAL | . | . | 73 | 73 | . | 8.409  | 24.025 | -15.502 | 1.00 | 50.00 | . |
| ATOM | 505 | CA  | CA  | . | VAL | VAL | . | . | 73 | 73 | . | 7.439  | 23.248 | -14.711 | 1.00 | 50.00 | . |
| ATOM | 506 | C   | C   | . | VAL | VAL | . | . | 73 | 73 | . | 6.080  | 23.335 | -15.421 | 1.00 | 50.00 | . |
| ATOM | 507 | O   | O   | . | VAL | VAL | . | . | 73 | 73 | . | 5.587  | 24.410 | -15.758 | 1.00 | 50.00 | . |
| ATOM | 508 | CB  | CB  | . | VAL | VAL | . | . | 73 | 73 | . | 7.381  | 23.798 | -13.274 | 1.00 | 50.00 | . |
| ATOM | 509 | CG1 | CG1 | . | VAL | VAL | . | . | 73 | 73 | . | 8.697  | 23.627 | -12.510 | 1.00 | 50.00 | . |
| ATOM | 510 | CG2 | CG2 | . | VAL | VAL | . | . | 73 | 73 | . | 7.151  | 25.298 | -13.315 | 1.00 | 50.00 | . |
| ATOM | 511 | N   | N   | . | ARG | ARG | . | . | 74 | 74 | . | 5.529  | 22.183 | -15.748 | 1.00 | 50.00 | . |
| ATOM | 512 | CA  | CA  | . | ARG | ARG | . | . | 74 | 74 | . | 4.228  | 22.094 | -16.428 | 1.00 | 50.00 | . |
| ATOM | 513 | C   | C   | . | ARG | ARG | . | . | 74 | 74 | . | 3.108  | 22.144 | -15.387 | 1.00 | 50.00 | . |
| ATOM | 514 | O   | O   | . | ARG | ARG | . | . | 74 | 74 | . | 3.217  | 21.613 | -14.280 | 1.00 | 50.00 | . |
| ATOM | 515 | CB  | CB  | . | ARG | ARG | . | . | 74 | 74 | . | 4.123  | 20.798 | -17.239 | 1.00 | 50.00 | . |
| ATOM | 516 | CG  | CG  | . | ARG | ARG | . | . | 74 | 74 | . | 5.189  | 20.702 | -18.331 | 1.00 | 50.00 | . |
| ATOM | 517 | CD  | CD  | . | ARG | ARG | . | . | 74 | 74 | . | 4.993  | 19.420 | -19.141 | 1.00 | 50.00 | . |
| ATOM | 518 | NE  | NE  | . | ARG | ARG | . | . | 74 | 74 | . | 5.989  | 19.343 | -20.226 | 1.00 | 50.00 | . |
| ATOM | 519 | CZ  | CZ  | . | ARG | ARG | . | . | 74 | 74 | . | 7.257  | 18.932 | -20.119 | 1.00 | 50.00 | . |
| ATOM | 520 | NH1 | NH1 | . | ARG | ARG | . | . | 74 | 74 | . | 7.759  | 18.533 | -18.958 | 1.00 | 50.00 | . |
| ATOM | 521 | NH2 | NH2 | . | ARG | ARG | . | . | 74 | 74 | . | 8.035  | 18.895 | -21.192 | 1.00 | 50.00 | . |
| ATOM | 522 | N   | N   | . | CYS | CYS | . | . | 75 | 75 | . | 2.036  | 22.826 | -15.765 | 1.00 | 50.00 | . |
| ATOM | 523 | CA  | CA  | . | CYS | CYS | . | . | 75 | 75 | . | 0.819  | 22.906 | -14.936 | 1.00 | 50.00 | . |
| ATOM | 524 | C   | C   | . | CYS | CYS | . | . | 75 | 75 | . | 0.235  | 21.499 | -14.746 | 1.00 | 50.00 | . |
| ATOM | 525 | O   | O   | . | CYS | CYS | . | . | 75 | 75 | . | 0.262  | 20.683 | -15.669 | 1.00 | 50.00 | . |
| ATOM | 526 | CB  | CB  | . | CYS | CYS | . | . | 75 | 75 | . | -0.215 | 23.785 | -15.634 | 1.00 | 50.00 | . |
| ATOM | 527 | SG  | SG  | . | CYS | CYS | . | . | 75 | 75 | . | 0.377  | 25.484 | -15.974 | 1.00 | 50.00 | . |
| ATOM | 528 | N   | N   | . | GLY | GLY | . | . | 76 | 76 | . | -0.094 | 21.199 | -13.487 | 1.00 | 50.00 | . |
| ATOM | 529 | CA  | CA  | . | GLY | GLY | . | . | 76 | 76 | . | -0.626 | 19.874 | -13.117 | 1.00 | 50.00 | . |
| ATOM | 530 | C   | C   | . | GLY | GLY | . | . | 76 | 76 | . | 0.432  | 19.015 | -12.411 | 1.00 | 50.00 | . |
| ATOM | 531 | O   | O   | . | GLY | GLY | . | . | 76 | 76 | . | 0.099  | 18.086 | -11.678 | 1.00 | 50.00 | . |
| ATOM | 532 | N   | N   | . | GLN | GLN | . | . | 77 | 77 | . | 1.701  | 19.315 | -12.685 | 1.00 | 50.00 | . |
| ATOM | 533 | CA  | CA  | . | GLN | GLN | . | . | 77 | 77 | . | 2.832  | 18.625 | -12.042 | 1.00 | 50.00 | . |
| ATOM | 534 | C   | C   | . | GLN | GLN | . | . | 77 | 77 | . | 2.942  | 19.029 | -10.567 | 1.00 | 50.00 | . |
| ATOM | 535 | O   | O   | . | GLN | GLN | . | . | 77 | 77 | . | 2.569  | 20.136 | -10.167 | 1.00 | 50.00 | . |
| ATOM | 536 | CB  | CB  | . | GLN | GLN | . | . | 77 | 77 | . | 4.143  | 18.934 | -12.768 | 1.00 | 50.00 | . |
| ATOM | 537 | CG  | CG  | . | GLN | GLN | . | . | 77 | 77 | . | 4.145  | 18.381 | -14.196 | 1.00 | 50.00 | . |
| ATOM | 538 | CD  | CD  | . | GLN | GLN | . | . | 77 | 77 | . | 5.496  | 18.619 | -14.869 | 1.00 | 50.00 | . |
| ATOM | 539 | OE1 | OE1 | . | GLN | GLN | . | . | 77 | 77 | . | 6.018  | 19.718 | -14.968 | 1.00 | 50.00 | . |
| ATOM | 540 | NE2 | NE2 | . | GLN | GLN | . | . | 77 | 77 | . | 6.151  | 17.569 | -15.284 | 1.00 | 50.00 | . |
| ATOM | 541 | N   | N   | . | ALA | ALA | . | . | 78 | 78 | . | 3.387  | 18.060 | -9.777  | 1.00 | 50.00 | . |
| ATOM | 542 | CA  | CA  | . | ALA | ALA | . | . | 78 | 78 | . | 3.647  | 18.262 | -8.344  | 1.00 | 50.00 | . |
| ATOM | 543 | C   | C   | . | ALA | ALA | . | . | 78 | 78 | . | 5.079  | 18.773 | -8.135  | 1.00 | 50.00 | . |

|      |     |     |     |       |     |     |    |    |          |        |        |      |       |   |
|------|-----|-----|-----|-------|-----|-----|----|----|----------|--------|--------|------|-------|---|
| ATOM | 544 | O   | O   | . ALA | ALA | . . | 78 | 78 | . 6.001  | 18.443 | -8.880 | 1.00 | 50.00 | . |
| ATOM | 545 | CB  | CB  | . ALA | ALA | . . | 78 | 78 | . 3.433  | 16.952 | -7.583 | 1.00 | 50.00 | . |
| ATOM | 546 | N   | N   | . VAL | VAL | . . | 79 | 79 | . 5.207  | 19.604 | -7.115 | 1.00 | 50.00 | . |
| ATOM | 547 | CA  | CA  | . VAL | VAL | . . | 79 | 79 | . 6.472  | 20.228 | -6.701 | 1.00 | 50.00 | . |
| ATOM | 548 | C   | C   | . VAL | VAL | . . | 79 | 79 | . 6.582  | 20.204 | -5.164 | 1.00 | 50.00 | . |
| ATOM | 549 | O   | O   | . VAL | VAL | . . | 79 | 79 | . 5.610  | 19.935 | -4.459 | 1.00 | 50.00 | . |
| ATOM | 550 | CB  | CB  | . VAL | VAL | . . | 79 | 79 | . 6.497  | 21.655 | -7.292 | 1.00 | 50.00 | . |
| ATOM | 551 | CG1 | CG1 | . VAL | VAL | . . | 79 | 79 | . 5.448  | 22.598 | -6.700 | 1.00 | 50.00 | . |
| ATOM | 552 | CG2 | CG2 | . VAL | VAL | . . | 79 | 79 | . 7.835  | 22.341 | -7.109 | 1.00 | 50.00 | . |
| ATOM | 553 | N   | N   | . ARG | ARG | . . | 80 | 80 | . 7.789  | 20.483 | -4.700 | 1.00 | 50.00 | . |
| ATOM | 554 | CA  | CA  | . ARG | ARG | . . | 80 | 80 | . 8.071  | 20.793 | -3.291 | 1.00 | 50.00 | . |
| ATOM | 555 | C   | C   | . ARG | ARG | . . | 80 | 80 | . 8.680  | 22.196 | -3.200 | 1.00 | 50.00 | . |
| ATOM | 556 | O   | O   | . ARG | ARG | . . | 80 | 80 | . 9.340  | 22.666 | -4.126 | 1.00 | 50.00 | . |
| ATOM | 557 | CB  | CB  | . ARG | ARG | . . | 80 | 80 | . 9.040  | 19.765 | -2.711 | 1.00 | 50.00 | . |
| ATOM | 558 | CG  | CG  | . ARG | ARG | . . | 80 | 80 | . 8.370  | 18.395 | -2.586 | 1.00 | 50.00 | . |
| ATOM | 559 | CD  | CD  | . ARG | ARG | . . | 80 | 80 | . 9.348  | 17.362 | -2.033 | 1.00 | 50.00 | . |
| ATOM | 560 | NE  | NE  | . ARG | ARG | . . | 80 | 80 | . 10.411 | 17.106 | -3.018 | 1.00 | 50.00 | . |
| ATOM | 561 | CZ  | CZ  | . ARG | ARG | . . | 80 | 80 | . 11.613 | 16.590 | -2.765 | 1.00 | 50.00 | . |
| ATOM | 562 | NH1 | NH1 | . ARG | ARG | . . | 80 | 80 | . 11.987 | 16.270 | -1.534 | 1.00 | 50.00 | . |
| ATOM | 563 | NH2 | NH2 | . ARG | ARG | . . | 80 | 80 | . 12.459 | 16.393 | -3.765 | 1.00 | 50.00 | . |
| ATOM | 564 | N   | N   | . LEU | LEU | . . | 81 | 81 | . 8.408  | 22.855 | -2.081 | 1.00 | 50.00 | . |
| ATOM | 565 | CA  | CA  | . LEU | LEU | . . | 81 | 81 | . 8.899  | 24.221 | -1.831 | 1.00 | 50.00 | . |
| ATOM | 566 | C   | C   | . LEU | LEU | . . | 81 | 81 | . 9.782  | 24.284 | -0.589 | 1.00 | 50.00 | . |
| ATOM | 567 | O   | O   | . LEU | LEU | . . | 81 | 81 | . 9.319  | 24.001 | 0.517  | 1.00 | 50.00 | . |
| ATOM | 568 | CB  | CB  | . LEU | LEU | . . | 81 | 81 | . 7.737  | 25.210 | -1.688 | 1.00 | 50.00 | . |
| ATOM | 569 | CG  | CG  | . LEU | LEU | . . | 81 | 81 | . 6.990  | 25.449 | -3.004 | 1.00 | 50.00 | . |
| ATOM | 570 | CD1 | CD1 | . LEU | LEU | . . | 81 | 81 | . 5.779  | 26.341 | -2.738 | 1.00 | 50.00 | . |
| ATOM | 571 | CD2 | CD2 | . LEU | LEU | . . | 81 | 81 | . 7.895  | 26.108 | -4.049 | 1.00 | 50.00 | . |
| ATOM | 572 | N   | N   | . THR | THR | . . | 82 | 82 | . 11.077 | 24.449 | -0.823 | 1.00 | 50.00 | . |
| ATOM | 573 | CA  | CA  | . THR | THR | . . | 82 | 82 | . 12.042 | 24.606 | 0.282  | 1.00 | 50.00 | . |
| ATOM | 574 | C   | C   | . THR | THR | . . | 82 | 82 | . 12.106 | 26.046 | 0.766  | 1.00 | 50.00 | . |
| ATOM | 575 | O   | O   | . THR | THR | . . | 82 | 82 | . 12.287 | 26.978 | -0.011 | 1.00 | 50.00 | . |
| ATOM | 576 | CB  | CB  | . THR | THR | . . | 82 | 82 | . 13.483 | 24.237 | -0.072 | 1.00 | 50.00 | . |
| ATOM | 577 | OG1 | OG1 | . THR | THR | . . | 82 | 82 | . 13.833 | 24.772 | -1.341 | 1.00 | 50.00 | . |
| ATOM | 578 | CG2 | CG2 | . THR | THR | . . | 82 | 82 | . 13.739 | 22.747 | 0.002  | 1.00 | 50.00 | . |
| ATOM | 579 | N   | N   | . HIS | HIS | . . | 83 | 83 | . 12.041 | 26.171 | 2.079  | 1.00 | 50.00 | . |
| ATOM | 580 | CA  | CA  | . HIS | HIS | . . | 83 | 83 | . 12.283 | 27.448 | 2.757  | 1.00 | 50.00 | . |
| ATOM | 581 | C   | C   | . HIS | HIS | . . | 83 | 83 | . 13.800 | 27.584 | 2.923  | 1.00 | 50.00 | . |
| ATOM | 582 | O   | O   | . HIS | HIS | . . | 83 | 83 | . 14.403 | 26.894 | 3.744  | 1.00 | 50.00 | . |
| ATOM | 583 | CB  | CB  | . HIS | HIS | . . | 83 | 83 | . 11.556 | 27.447 | 4.104  | 1.00 | 50.00 | . |
| ATOM | 584 | CG  | CG  | . HIS | HIS | . . | 83 | 83 | . 11.721 | 28.786 | 4.823  | 1.00 | 50.00 | . |
| ATOM | 585 | ND1 | ND1 | . HIS | HIS | . . | 83 | 83 | . 12.366 | 28.966 | 5.970  | 1.00 | 50.00 | . |
| ATOM | 586 | CD2 | CD2 | . HIS | HIS | . . | 83 | 83 | . 11.293 | 29.970 | 4.400  | 1.00 | 50.00 | . |
| ATOM | 587 | CE1 | CE1 | . HIS | HIS | . . | 83 | 83 | . 12.338 | 30.256 | 6.277  | 1.00 | 50.00 | . |
| ATOM | 588 | NE2 | NE2 | . HIS | HIS | . . | 83 | 83 | . 11.680 | 30.865 | 5.300  | 1.00 | 50.00 | . |
| ATOM | 589 | N   | N   | . VAL | VAL | . . | 84 | 84 | . 14.385 | 28.489 | 2.147  | 1.00 | 50.00 | . |
| ATOM | 590 | CA  | CA  | . VAL | VAL | . . | 84 | 84 | . 15.855 | 28.649 | 2.051  | 1.00 | 50.00 | . |
| ATOM | 591 | C   | C   | . VAL | VAL | . . | 84 | 84 | . 16.580 | 28.738 | 3.409  | 1.00 | 50.00 | . |
| ATOM | 592 | O   | O   | . VAL | VAL | . . | 84 | 84 | . 17.528 | 27.997 | 3.656  | 1.00 | 50.00 | . |
| ATOM | 593 | CB  | CB  | . VAL | VAL | . . | 84 | 84 | . 16.204 | 29.851 | 1.144  | 1.00 | 50.00 | . |
| ATOM | 594 | CG1 | CG1 | . VAL | VAL | . . | 84 | 84 | . 15.657 | 31.187 | 1.665  | 1.00 | 50.00 | . |
| ATOM | 595 | CG2 | CG2 | . VAL | VAL | . . | 84 | 84 | . 17.713 | 29.962 | 0.896  | 1.00 | 50.00 | . |
| ATOM | 596 | N   | N   | . LEU | LEU | . . | 85 | 85 | . 16.072 | 29.602 | 4.284  | 1.00 | 50.00 | . |
| ATOM | 597 | CA  | CA  | . LEU | LEU | . . | 85 | 85 | . 16.779 | 29.940 | 5.531  | 1.00 | 50.00 | . |
| ATOM | 598 | C   | C   | . LEU | LEU | . . | 85 | 85 | . 16.781 | 28.793 | 6.554  | 1.00 | 50.00 | . |
| ATOM | 599 | O   | O   | . LEU | LEU | . . | 85 | 85 | . 17.701 | 28.678 | 7.359  | 1.00 | 50.00 | . |
| ATOM | 600 | CB  | CB  | . LEU | LEU | . . | 85 | 85 | . 16.253 | 31.264 | 6.107  | 1.00 | 50.00 | . |

|      |     |     |     |       |     |     |    |    |          |        |        |      |       |   |
|------|-----|-----|-----|-------|-----|-----|----|----|----------|--------|--------|------|-------|---|
| ATOM | 601 | CG  | CG  | . LEU | LEU | . . | 85 | 85 | . 17.081 | 31.732 | 7.314  | 1.00 | 50.00 | . |
| ATOM | 602 | CD1 | CD1 | . LEU | LEU | . . | 85 | 85 | . 17.208 | 33.255 | 7.345  | 1.00 | 50.00 | . |
| ATOM | 603 | CD2 | CD2 | . LEU | LEU | . . | 85 | 85 | . 16.455 | 31.260 | 8.629  | 1.00 | 50.00 | . |
| ATOM | 604 | N   | N   | . THR | THR | . . | 86 | 86 | . 15.741 | 27.967 | 6.524  | 1.00 | 50.00 | . |
| ATOM | 605 | CA  | CA  | . THR | THR | . . | 86 | 86 | . 15.599 | 26.878 | 7.512  | 1.00 | 50.00 | . |
| ATOM | 606 | C   | C   | . THR | THR | . . | 86 | 86 | . 15.786 | 25.471 | 6.919  | 1.00 | 50.00 | . |
| ATOM | 607 | O   | O   | . THR | THR | . . | 86 | 86 | . 15.779 | 24.488 | 7.656  | 1.00 | 50.00 | . |
| ATOM | 608 | CB  | CB  | . THR | THR | . . | 86 | 86 | . 14.262 | 26.971 | 8.267  | 1.00 | 50.00 | . |
| ATOM | 609 | OG1 | OG1 | . THR | THR | . . | 86 | 86 | . 13.163 | 26.784 | 7.369  | 1.00 | 50.00 | . |
| ATOM | 610 | CG2 | CG2 | . THR | THR | . . | 86 | 86 | . 14.120 | 28.302 | 9.017  | 1.00 | 50.00 | . |
| ATOM | 611 | N   | N   | . GLY | GLY | . . | 87 | 87 | . 15.849 | 25.404 | 5.581  | 1.00 | 50.00 | . |
| ATOM | 612 | CA  | CA  | . GLY | GLY | . . | 87 | 87 | . 15.968 | 24.148 | 4.811  | 1.00 | 50.00 | . |
| ATOM | 613 | C   | C   | . GLY | GLY | . . | 87 | 87 | . 14.783 | 23.182 | 4.988  | 1.00 | 50.00 | . |
| ATOM | 614 | O   | O   | . GLY | GLY | . . | 87 | 87 | . 14.881 | 22.011 | 4.627  | 1.00 | 50.00 | . |
| ATOM | 615 | N   | N   | . LYS | LYS | . . | 88 | 88 | . 13.673 | 23.710 | 5.499  | 1.00 | 50.00 | . |
| ATOM | 616 | CA  | CA  | . LYS | LYS | . . | 88 | 88 | . 12.409 | 22.968 | 5.651  | 1.00 | 50.00 | . |
| ATOM | 617 | C   | C   | . LYS | LYS | . . | 88 | 88 | . 11.636 | 23.007 | 4.323  | 1.00 | 50.00 | . |
| ATOM | 618 | O   | O   | . LYS | LYS | . . | 88 | 88 | . 11.988 | 23.733 | 3.392  | 1.00 | 50.00 | . |
| ATOM | 619 | CB  | CB  | . LYS | LYS | . . | 88 | 88 | . 11.581 | 23.608 | 6.775  | 1.00 | 50.00 | . |
| ATOM | 620 | CG  | CG  | . LYS | LYS | . . | 88 | 88 | . 12.243 | 23.553 | 8.159  | 1.00 | 50.00 | . |
| ATOM | 621 | CD  | CD  | . LYS | LYS | . . | 88 | 88 | . 12.208 | 22.144 | 8.746  | 1.00 | 50.00 | . |
| ATOM | 622 | CE  | CE  | . LYS | LYS | . . | 88 | 88 | . 13.014 | 21.956 | 10.035 | 1.00 | 50.00 | . |
| ATOM | 623 | NZ  | NZ  | . LYS | LYS | . . | 88 | 88 | . 14.439 | 22.297 | 9.890  | 1.00 | 50.00 | . |
| ATOM | 624 | N   | N   | . ASN | ASN | . . | 89 | 89 | . 10.563 | 22.233 | 4.263  | 1.00 | 50.00 | . |
| ATOM | 625 | CA  | CA  | . ASN | ASN | . . | 89 | 89 | . 9.670  | 22.194 | 3.094  | 1.00 | 50.00 | . |
| ATOM | 626 | C   | C   | . ASN | ASN | . . | 89 | 89 | . 8.244  | 22.558 | 3.491  | 1.00 | 50.00 | . |
| ATOM | 627 | O   | O   | . ASN | ASN | . . | 89 | 89 | . 7.788  | 22.190 | 4.574  | 1.00 | 50.00 | . |
| ATOM | 628 | CB  | CB  | . ASN | ASN | . . | 89 | 89 | . 9.671  | 20.798 | 2.464  | 1.00 | 50.00 | . |
| ATOM | 629 | CG  | CG  | . ASN | ASN | . . | 89 | 89 | . 11.019 | 20.489 | 1.818  | 1.00 | 50.00 | . |
| ATOM | 630 | OD1 | OD1 | . ASN | ASN | . . | 89 | 89 | . 11.755 | 19.591 | 2.198  | 1.00 | 50.00 | . |
| ATOM | 631 | ND2 | ND2 | . ASN | ASN | . . | 89 | 89 | . 11.318 | 21.233 | 0.783  | 1.00 | 50.00 | . |
| ATOM | 632 | N   | N   | . LEU | LEU | . . | 90 | 90 | . 7.565  | 23.243 | 2.577  | 1.00 | 50.00 | . |
| ATOM | 633 | CA  | CA  | . LEU | LEU | . . | 90 | 90 | . 6.132  | 23.550 | 2.715  | 1.00 | 50.00 | . |
| ATOM | 634 | C   | C   | . LEU | LEU | . . | 90 | 90 | . 5.359  | 22.230 | 2.844  | 1.00 | 50.00 | . |
| ATOM | 635 | O   | O   | . LEU | LEU | . . | 90 | 90 | . 5.403  | 21.378 | 1.959  | 1.00 | 50.00 | . |
| ATOM | 636 | CB  | CB  | . LEU | LEU | . . | 90 | 90 | . 5.642  | 24.333 | 1.494  | 1.00 | 50.00 | . |
| ATOM | 637 | CG  | CG  | . LEU | LEU | . . | 90 | 90 | . 4.236  | 24.904 | 1.709  | 1.00 | 50.00 | . |
| ATOM | 638 | CD1 | CD1 | . LEU | LEU | . . | 90 | 90 | . 4.242  | 25.983 | 2.795  | 1.00 | 50.00 | . |
| ATOM | 639 | CD2 | CD2 | . LEU | LEU | . . | 90 | 90 | . 3.692  | 25.470 | 0.398  | 1.00 | 50.00 | . |
| ATOM | 640 | N   | N   | . HIS | HIS | . . | 91 | 91 | . 4.814  | 22.033 | 4.033  | 1.00 | 50.00 | . |
| ATOM | 641 | CA  | CA  | . HIS | HIS | . . | 91 | 91 | . 4.214  | 20.757 | 4.428  | 1.00 | 50.00 | . |
| ATOM | 642 | C   | C   | . HIS | HIS | . . | 91 | 91 | . 2.773  | 20.943 | 4.890  | 1.00 | 50.00 | . |
| ATOM | 643 | O   | O   | . HIS | HIS | . . | 91 | 91 | . 2.357  | 22.004 | 5.366  | 1.00 | 50.00 | . |
| ATOM | 644 | CB  | CB  | . HIS | HIS | . . | 91 | 91 | . 5.026  | 20.179 | 5.579  | 1.00 | 50.00 | . |
| ATOM | 645 | CG  | CG  | . HIS | HIS | . . | 91 | 91 | . 4.695  | 18.704 | 5.803  | 1.00 | 50.00 | . |
| ATOM | 646 | ND1 | ND1 | . HIS | HIS | . . | 91 | 91 | . 5.397  | 17.708 | 5.293  | 1.00 | 50.00 | . |
| ATOM | 647 | CD2 | CD2 | . HIS | HIS | . . | 91 | 91 | . 3.863  | 18.204 | 6.709  | 1.00 | 50.00 | . |
| ATOM | 648 | CE1 | CE1 | . HIS | HIS | . . | 91 | 91 | . 5.071  | 16.601 | 5.944  | 1.00 | 50.00 | . |
| ATOM | 649 | NE2 | NE2 | . HIS | HIS | . . | 91 | 91 | . 4.092  | 16.898 | 6.788  | 1.00 | 50.00 | . |
| ATOM | 650 | N   | N   | . THR | THR | . . | 92 | 92 | . 2.030  | 19.861 | 4.733  | 1.00 | 50.00 | . |
| ATOM | 651 | CA  | CA  | . THR | THR | . . | 92 | 92 | . 0.627  | 19.806 | 5.159  | 1.00 | 50.00 | . |
| ATOM | 652 | C   | C   | . THR | THR | . . | 92 | 92 | . 0.256  | 18.370 | 5.546  | 1.00 | 50.00 | . |
| ATOM | 653 | O   | O   | . THR | THR | . . | 92 | 92 | . 0.910  | 17.414 | 5.145  | 1.00 | 50.00 | . |
| ATOM | 654 | CB  | CB  | . THR | THR | . . | 92 | 92 | . -0.249 | 20.329 | 4.024  | 1.00 | 50.00 | . |
| ATOM | 655 | OG1 | OG1 | . THR | THR | . . | 92 | 92 | . 0.176  | 21.613 | 3.621  | 1.00 | 50.00 | . |
| ATOM | 656 | CG2 | CG2 | . THR | THR | . . | 92 | 92 | . -1.608 | 20.681 | 4.558  | 1.00 | 50.00 | . |
| ATOM | 657 | N   | N   | . HIS | HIS | . . | 93 | 93 | . -0.831 | 18.250 | 6.303  | 1.00 | 50.00 | . |

|      |     |     |     |   |     |     |   |   |    |    |   |        |        |        |      |       |   |
|------|-----|-----|-----|---|-----|-----|---|---|----|----|---|--------|--------|--------|------|-------|---|
| ATOM | 658 | CA  | CA  | . | HIS | HIS | . | . | 93 | 93 | . | -1.246 | 16.991 | 6.958  | 1.00 | 50.00 | . |
| ATOM | 659 | C   | C   | . | HIS | HIS | . | . | 93 | 93 | . | -2.599 | 17.147 | 7.673  | 1.00 | 50.00 | . |
| ATOM | 660 | O   | O   | . | HIS | HIS | . | . | 93 | 93 | . | -3.162 | 18.237 | 7.706  | 1.00 | 50.00 | . |
| ATOM | 661 | CB  | CB  | . | HIS | HIS | . | . | 93 | 93 | . | -0.161 | 16.547 | 7.963  | 1.00 | 50.00 | . |
| ATOM | 662 | CG  | CG  | . | HIS | HIS | . | . | 93 | 93 | . | 0.483  | 17.681 | 8.778  | 1.00 | 50.00 | . |
| ATOM | 663 | ND1 | ND1 | . | HIS | HIS | . | . | 93 | 93 | . | 1.655  | 17.597 | 9.390  | 1.00 | 50.00 | . |
| ATOM | 664 | CD2 | CD2 | . | HIS | HIS | . | . | 93 | 93 | . | 0.042  | 18.932 | 8.938  | 1.00 | 50.00 | . |
| ATOM | 665 | CE1 | CE1 | . | HIS | HIS | . | . | 93 | 93 | . | 1.946  | 18.793 | 9.886  | 1.00 | 50.00 | . |
| ATOM | 666 | NE2 | NE2 | . | HIS | HIS | . | . | 93 | 93 | . | 0.946  | 19.619 | 9.607  | 1.00 | 50.00 | . |
| ATOM | 667 | N   | N   | . | HIS | HIS | . | . | 94 | 94 | . | -2.993 | 16.107 | 8.400  | 1.00 | 50.00 | . |
| ATOM | 668 | CA  | CA  | . | HIS | HIS | . | . | 94 | 94 | . | -4.275 | 16.051 | 9.127  | 1.00 | 50.00 | . |
| ATOM | 669 | C   | C   | . | HIS | HIS | . | . | 94 | 94 | . | -4.243 | 16.658 | 10.540 | 1.00 | 50.00 | . |
| ATOM | 670 | O   | O   | . | HIS | HIS | . | . | 94 | 94 | . | -4.671 | 16.058 | 11.524 | 1.00 | 50.00 | . |
| ATOM | 671 | CB  | CB  | . | HIS | HIS | . | . | 94 | 94 | . | -4.782 | 14.607 | 9.139  | 1.00 | 50.00 | . |
| ATOM | 672 | CG  | CG  | . | HIS | HIS | . | . | 94 | 94 | . | -5.517 | 14.263 | 7.844  | 1.00 | 50.00 | . |
| ATOM | 673 | ND1 | ND1 | . | HIS | HIS | . | . | 94 | 94 | . | -6.432 | 15.013 | 7.235  | 1.00 | 50.00 | . |
| ATOM | 674 | CD2 | CD2 | . | HIS | HIS | . | . | 94 | 94 | . | -5.353 | 13.150 | 7.138  | 1.00 | 50.00 | . |
| ATOM | 675 | CE1 | CE1 | . | HIS | HIS | . | . | 94 | 94 | . | -6.836 | 14.360 | 6.150  | 1.00 | 50.00 | . |
| ATOM | 676 | NE2 | NE2 | . | HIS | HIS | . | . | 94 | 94 | . | -6.167 | 13.212 | 6.090  | 1.00 | 50.00 | . |
| ATOM | 677 | N   | N   | . | PHE | PHE | . | . | 95 | 95 | . | -3.720 | 17.876 | 10.606 | 1.00 | 50.00 | . |
| ATOM | 678 | CA  | CA  | . | PHE | PHE | . | . | 95 | 95 | . | -3.749 | 18.681 | 11.837 | 1.00 | 50.00 | . |
| ATOM | 679 | C   | C   | . | PHE | PHE | . | . | 95 | 95 | . | -4.610 | 19.933 | 11.619 | 1.00 | 50.00 | . |
| ATOM | 680 | O   | O   | . | PHE | PHE | . | . | 95 | 95 | . | -4.651 | 20.446 | 10.495 | 1.00 | 50.00 | . |
| ATOM | 681 | CB  | CB  | . | PHE | PHE | . | . | 95 | 95 | . | -2.337 | 19.078 | 12.281 | 1.00 | 50.00 | . |
| ATOM | 682 | CG  | CG  | . | PHE | PHE | . | . | 95 | 95 | . | -1.528 | 17.860 | 12.727 | 1.00 | 50.00 | . |
| ATOM | 683 | CD1 | CD1 | . | PHE | PHE | . | . | 95 | 95 | . | -1.517 | 17.435 | 14.047 | 1.00 | 50.00 | . |
| ATOM | 684 | CD2 | CD2 | . | PHE | PHE | . | . | 95 | 95 | . | -0.749 | 17.198 | 11.797 | 1.00 | 50.00 | . |
| ATOM | 685 | CE1 | CE1 | . | PHE | PHE | . | . | 95 | 95 | . | -0.709 | 16.364 | 14.414 | 1.00 | 50.00 | . |
| ATOM | 686 | CE2 | CE2 | . | PHE | PHE | . | . | 95 | 95 | . | 0.066  | 16.137 | 12.150 | 1.00 | 50.00 | . |
| ATOM | 687 | CZ  | CZ  | . | PHE | PHE | . | . | 95 | 95 | . | 0.085  | 15.718 | 13.472 | 1.00 | 50.00 | . |
| ATOM | 688 | N   | N   | . | PRO | PRO | . | . | 96 | 96 | . | -5.321 | 20.379 | 12.663 | 1.00 | 50.00 | . |
| ATOM | 689 | CA  | CA  | . | PRO | PRO | . | . | 96 | 96 | . | -6.113 | 21.617 | 12.615 | 1.00 | 50.00 | . |
| ATOM | 690 | C   | C   | . | PRO | PRO | . | . | 96 | 96 | . | -5.184 | 22.835 | 12.621 | 1.00 | 50.00 | . |
| ATOM | 691 | O   | O   | . | PRO | PRO | . | . | 96 | 96 | . | -4.134 | 22.857 | 13.263 | 1.00 | 50.00 | . |
| ATOM | 692 | CB  | CB  | . | PRO | PRO | . | . | 96 | 96 | . | -6.984 | 21.560 | 13.869 | 1.00 | 50.00 | . |
| ATOM | 693 | CG  | CG  | . | PRO | PRO | . | . | 96 | 96 | . | -6.119 | 20.789 | 14.866 | 1.00 | 50.00 | . |
| ATOM | 694 | CD  | CD  | . | PRO | PRO | . | . | 96 | 96 | . | -5.433 | 19.739 | 13.991 | 1.00 | 50.00 | . |
| ATOM | 695 | N   | N   | . | SER | SER | . | . | 97 | 97 | . | -5.573 | 23.817 | 11.827 | 1.00 | 50.00 | . |
| ATOM | 696 | CA  | CA  | . | SER | SER | . | . | 97 | 97 | . | -4.845 | 25.089 | 11.721 | 1.00 | 50.00 | . |
| ATOM | 697 | C   | C   | . | SER | SER | . | . | 97 | 97 | . | -4.816 | 25.815 | 13.078 | 1.00 | 50.00 | . |
| ATOM | 698 | O   | O   | . | SER | SER | . | . | 97 | 97 | . | -5.693 | 25.588 | 13.917 | 1.00 | 50.00 | . |
| ATOM | 699 | CB  | CB  | . | SER | SER | . | . | 97 | 97 | . | -5.537 | 25.903 | 10.639 | 1.00 | 50.00 | . |
| ATOM | 700 | OG  | OG  | . | SER | SER | . | . | 97 | 97 | . | -4.866 | 27.125 | 10.340 | 1.00 | 50.00 | . |
| ATOM | 701 | N   | N   | . | PRO | PRO | . | . | 98 | 98 | . | -3.761 | 26.605 | 13.329 | 1.00 | 50.00 | . |
| ATOM | 702 | CA  | CA  | . | PRO | PRO | . | . | 98 | 98 | . | -3.528 | 27.245 | 14.634 | 1.00 | 50.00 | . |
| ATOM | 703 | C   | C   | . | PRO | PRO | . | . | 98 | 98 | . | -4.664 | 28.162 | 15.100 | 1.00 | 50.00 | . |
| ATOM | 704 | O   | O   | . | PRO | PRO | . | . | 98 | 98 | . | -5.025 | 28.135 | 16.271 | 1.00 | 50.00 | . |
| ATOM | 705 | CB  | CB  | . | PRO | PRO | . | . | 98 | 98 | . | -2.203 | 27.992 | 14.465 | 1.00 | 50.00 | . |
| ATOM | 706 | CG  | CG  | . | PRO | PRO | . | . | 98 | 98 | . | -2.172 | 28.295 | 12.973 | 1.00 | 50.00 | . |
| ATOM | 707 | CD  | CD  | . | PRO | PRO | . | . | 98 | 98 | . | -2.705 | 27.004 | 12.376 | 1.00 | 50.00 | . |
| ATOM | 708 | N   | N   | . | LEU | LEU | . | . | 99 | 99 | . | -5.156 | 29.006 | 14.202 | 1.00 | 99.99 | . |
| ATOM | 709 | CA  | CA  | . | LEU | LEU | . | . | 99 | 99 | . | -6.201 | 29.984 | 14.545 | 1.00 | 99.99 | . |
| ATOM | 710 | C   | C   | . | LEU | LEU | . | . | 99 | 99 | . | -7.476 | 29.849 | 13.695 | 1.00 | 99.99 | . |
| ATOM | 711 | O   | O   | . | LEU | LEU | . | . | 99 | 99 | . | -8.562 | 30.236 | 14.112 | 1.00 | 99.99 | . |
| ATOM | 712 | CB  | CB  | . | LEU | LEU | . | . | 99 | 99 | . | -5.572 | 31.379 | 14.461 | 1.00 | 99.99 | . |
| ATOM | 713 | CG  | CG  | . | LEU | LEU | . | . | 99 | 99 | . | -4.791 | 31.870 | 15.687 | 1.00 | 99.99 | . |
| ATOM | 714 | CD1 | CD1 | . | LEU | LEU | . | . | 99 | 99 | . | -3.471 | 31.128 | 15.863 | 1.00 | 99.99 | . |



|      |     |     |     |       |     |     |     |     |           |        |        |      |       |   |
|------|-----|-----|-----|-------|-----|-----|-----|-----|-----------|--------|--------|------|-------|---|
| ATOM | 715 | CD2 | CD2 | . LEU | LEU | . . | 99  | 99  | . -4.472  | 33.359 | 15.551 | 1.00 | 99.99 | . |
| ATOM | 716 | N   | N   | . SER | SER | . . | 100 | 100 | . -7.336  | 29.264 | 12.511 | 1.00 | 99.99 | . |
| ATOM | 717 | CA  | CA  | . SER | SER | . . | 100 | 100 | . -8.483  | 29.047 | 11.612 | 1.00 | 99.99 | . |
| ATOM | 718 | C   | C   | . SER | SER | . . | 100 | 100 | . -8.482  | 27.643 | 11.068 | 1.00 | 99.99 | . |
| ATOM | 719 | O   | O   | . SER | SER | . . | 100 | 100 | . -7.789  | 27.388 | 10.083 | 1.00 | 99.99 | . |
| ATOM | 720 | CB  | CB  | . SER | SER | . . | 100 | 100 | . -8.467  | 30.078 | 10.483 | 1.00 | 99.99 | . |
| ATOM | 721 | OG  | OG  | . SER | SER | . . | 100 | 100 | . -9.394  | 29.788 | 9.437  | 1.00 | 99.99 | . |
| ATOM | 722 | N   | N   | . ASN | ASN | . . | 101 | 101 | . -9.007  | 26.736 | 11.884 | 1.00 | 99.99 | . |
| ATOM | 723 | CA  | CA  | . ASN | ASN | . . | 101 | 101 | . -9.245  | 25.319 | 11.580 | 1.00 | 99.99 | . |
| ATOM | 724 | C   | C   | . ASN | ASN | . . | 101 | 101 | . -10.317 | 25.066 | 10.511 | 1.00 | 99.99 | . |
| ATOM | 725 | O   | O   | . ASN | ASN | . . | 101 | 101 | . -11.545 | 25.151 | 10.756 | 1.00 | 99.99 | . |
| ATOM | 726 | CB  | CB  | . ASN | ASN | . . | 101 | 101 | . -9.615  | 24.625 | 12.907 | 1.00 | 99.99 | . |
| ATOM | 727 | CG  | CG  | . ASN | ASN | . . | 101 | 101 | . -10.865 | 25.193 | 13.593 | 1.00 | 99.99 | . |
| ATOM | 728 | OD1 | OD1 | . ASN | ASN | . . | 101 | 101 | . -11.742 | 25.880 | 13.057 | 1.00 | 99.99 | . |
| ATOM | 729 | ND2 | ND2 | . ASN | ASN | . . | 101 | 101 | . -10.972 | 25.101 | 14.873 | 1.00 | 99.99 | . |
| ATOM | 730 | N   | N   | . ASN | ASN | . . | 102 | 102 | . -10.116 | 24.746 | 9.254  | 1.00 | 50.00 | . |
| ATOM | 731 | CA  | CA  | . ASN | ASN | . . | 102 | 102 | . -8.936  | 24.576 | 8.410  | 1.00 | 50.00 | . |
| ATOM | 732 | C   | C   | . ASN | ASN | . . | 102 | 102 | . -7.783  | 23.692 | 8.881  | 1.00 | 50.00 | . |
| ATOM | 733 | O   | O   | . ASN | ASN | . . | 102 | 102 | . -7.572  | 23.421 | 10.057 | 1.00 | 50.00 | . |
| ATOM | 734 | CB  | CB  | . ASN | ASN | . . | 102 | 102 | . -8.404  | 25.904 | 7.875  | 1.00 | 50.00 | . |
| ATOM | 735 | CG  | CG  | . ASN | ASN | . . | 102 | 102 | . -9.478  | 26.662 | 7.116  | 1.00 | 50.00 | . |
| ATOM | 736 | OD1 | OD1 | . ASN | ASN | . . | 102 | 102 | . -9.832  | 27.807 | 7.352  | 1.00 | 50.00 | . |
| ATOM | 737 | ND2 | ND2 | . ASN | ASN | . . | 102 | 102 | . -9.880  | 26.026 | 6.052  | 1.00 | 50.00 | . |
| ATOM | 738 | N   | N   | . GLN | GLN | . . | 103 | 103 | . -7.136  | 23.183 | 7.853  | 1.00 | 50.00 | . |
| ATOM | 739 | CA  | CA  | . GLN | GLN | . . | 103 | 103 | . -5.979  | 22.290 | 7.963  | 1.00 | 50.00 | . |
| ATOM | 740 | C   | C   | . GLN | GLN | . . | 103 | 103 | . -4.703  | 23.124 | 8.138  | 1.00 | 50.00 | . |
| ATOM | 741 | O   | O   | . GLN | GLN | . . | 103 | 103 | . -4.541  | 24.171 | 7.513  | 1.00 | 50.00 | . |
| ATOM | 742 | CB  | CB  | . GLN | GLN | . . | 103 | 103 | . -5.960  | 21.482 | 6.667  | 1.00 | 50.00 | . |
| ATOM | 743 | CG  | CG  | . GLN | GLN | . . | 103 | 103 | . -4.929  | 20.361 | 6.711  | 1.00 | 50.00 | . |
| ATOM | 744 | CD  | CD  | . GLN | GLN | . . | 103 | 103 | . -5.073  | 19.431 | 5.514  | 1.00 | 50.00 | . |
| ATOM | 745 | OE1 | OE1 | . GLN | GLN | . . | 103 | 103 | . -5.945  | 18.593 | 5.397  | 1.00 | 50.00 | . |
| ATOM | 746 | NE2 | NE2 | . GLN | GLN | . . | 103 | 103 | . -4.193  | 19.599 | 4.556  | 1.00 | 50.00 | . |
| ATOM | 747 | N   | N   | . GLU | GLU | . . | 104 | 104 | . -3.815  | 22.615 | 8.981  | 1.00 | 50.00 | . |
| ATOM | 748 | CA  | CA  | . GLU | GLU | . . | 104 | 104 | . -2.520  | 23.255 | 9.268  | 1.00 | 50.00 | . |
| ATOM | 749 | C   | C   | . GLU | GLU | . . | 104 | 104 | . -1.579  | 23.155 | 8.056  | 1.00 | 50.00 | . |
| ATOM | 750 | O   | O   | . GLU | GLU | . . | 104 | 104 | . -1.514  | 22.125 | 7.385  | 1.00 | 50.00 | . |
| ATOM | 751 | CB  | CB  | . GLU | GLU | . . | 104 | 104 | . -1.878  | 22.573 | 10.480 | 1.00 | 50.00 | . |
| ATOM | 752 | CG  | CG  | . GLU | GLU | . . | 104 | 104 | . -0.633  | 23.329 | 10.952 | 1.00 | 50.00 | . |
| ATOM | 753 | CD  | CD  | . GLU | GLU | . . | 104 | 104 | . 0.180   | 22.497 | 11.934 | 1.00 | 50.00 | . |
| ATOM | 754 | OE1 | OE1 | . GLU | GLU | . . | 104 | 104 | . 1.027   | 21.736 | 11.425 | 1.00 | 50.00 | . |
| ATOM | 755 | OE2 | OE2 | . GLU | GLU | . . | 104 | 104 | . -0.063  | 22.617 | 13.153 | 1.00 | 50.00 | . |
| ATOM | 756 | N   | N   | . VAL | VAL | . . | 105 | 105 | . -0.804  | 24.219 | 7.877  | 1.00 | 50.00 | . |
| ATOM | 757 | CA  | CA  | . VAL | VAL | . . | 105 | 105 | . 0.293   | 24.275 | 6.890  | 1.00 | 50.00 | . |
| ATOM | 758 | C   | C   | . VAL | VAL | . . | 105 | 105 | . 1.578   | 24.645 | 7.642  | 1.00 | 50.00 | . |
| ATOM | 759 | O   | O   | . VAL | VAL | . . | 105 | 105 | . 1.633   | 25.666 | 8.319  | 1.00 | 50.00 | . |
| ATOM | 760 | CB  | CB  | . VAL | VAL | . . | 105 | 105 | . -0.018  | 25.299 | 5.784  | 1.00 | 50.00 | . |
| ATOM | 761 | CG1 | CG1 | . VAL | VAL | . . | 105 | 105 | . 1.142   | 25.454 | 4.797  | 1.00 | 50.00 | . |
| ATOM | 762 | CG2 | CG2 | . VAL | VAL | . . | 105 | 105 | . -1.230  | 24.848 | 4.973  | 1.00 | 50.00 | . |
| ATOM | 763 | N   | N   | . SER | SER | . . | 106 | 106 | . 2.566   | 23.774 | 7.559  | 1.00 | 50.00 | . |
| ATOM | 764 | CA  | CA  | . SER | SER | . . | 106 | 106 | . 3.845   | 23.956 | 8.270  | 1.00 | 50.00 | . |
| ATOM | 765 | C   | C   | . SER | SER | . . | 106 | 106 | . 5.061   | 23.876 | 7.338  | 1.00 | 50.00 | . |
| ATOM | 766 | O   | O   | . SER | SER | . . | 106 | 106 | . 4.929   | 23.690 | 6.131  | 1.00 | 50.00 | . |
| ATOM | 767 | CB  | CB  | . SER | SER | . . | 106 | 106 | . 3.964   | 22.905 | 9.377  | 1.00 | 50.00 | . |
| ATOM | 768 | OG  | OG  | . SER | SER | . . | 106 | 106 | . 3.857   | 21.602 | 8.801  | 1.00 | 50.00 | . |
| ATOM | 769 | N   | N   | . ALA | ALA | . . | 107 | 107 | . 6.215   | 24.183 | 7.916  | 1.00 | 50.00 | . |
| ATOM | 770 | CA  | CA  | . ALA | ALA | . . | 107 | 107 | . 7.530   | 24.035 | 7.271  | 1.00 | 50.00 | . |
| ATOM | 771 | C   | C   | . ALA | ALA | . . | 107 | 107 | . 8.244   | 22.873 | 7.974  | 1.00 | 50.00 | . |

|      |     |     |     |       |     |     |     |     |          |        |        |      |       |   |
|------|-----|-----|-----|-------|-----|-----|-----|-----|----------|--------|--------|------|-------|---|
| ATOM | 772 | O   | O   | . ALA | ALA | . . | 107 | 107 | . 8.584  | 22.948 | 9.155  | 1.00 | 50.00 | . |
| ATOM | 773 | CB  | CB  | . ALA | ALA | . . | 107 | 107 | . 8.316  | 25.341 | 7.415  | 1.00 | 50.00 | . |
| ATOM | 774 | N   | N   | . PHE | PHE | . . | 108 | 108 | . 8.278  | 21.745 | 7.276  | 1.00 | 50.00 | . |
| ATOM | 775 | CA  | CA  | . PHE | PHE | . . | 108 | 108 | . 8.737  | 20.471 | 7.855  | 1.00 | 50.00 | . |
| ATOM | 776 | C   | C   | . PHE | PHE | . . | 108 | 108 | . 10.034 | 19.915 | 7.255  | 1.00 | 50.00 | . |
| ATOM | 777 | O   | O   | . PHE | PHE | . . | 108 | 108 | . 10.365 | 20.158 | 6.097  | 1.00 | 50.00 | . |
| ATOM | 778 | CB  | CB  | . PHE | PHE | . . | 108 | 108 | . 7.590  | 19.458 | 7.753  | 1.00 | 50.00 | . |
| ATOM | 779 | CG  | CG  | . PHE | PHE | . . | 108 | 108 | . 8.011  | 18.001 | 7.960  | 1.00 | 50.00 | . |
| ATOM | 780 | CD1 | CD1 | . PHE | PHE | . . | 108 | 108 | . 8.154  | 17.507 | 9.248  | 1.00 | 50.00 | . |
| ATOM | 781 | CD2 | CD2 | . PHE | PHE | . . | 108 | 108 | . 8.388  | 17.232 | 6.865  | 1.00 | 50.00 | . |
| ATOM | 782 | CE1 | CE1 | . PHE | PHE | . . | 108 | 108 | . 8.659  | 16.230 | 9.446  | 1.00 | 50.00 | . |
| ATOM | 783 | CE2 | CE2 | . PHE | PHE | . . | 108 | 108 | . 8.899  | 15.956 | 7.062  | 1.00 | 50.00 | . |
| ATOM | 784 | CZ  | CZ  | . PHE | PHE | . . | 108 | 108 | . 9.028  | 15.454 | 8.352  | 1.00 | 50.00 | . |
| ATOM | 785 | N   | N   | . GLY | GLY | . . | 109 | 109 | . 10.700 | 19.136 | 8.117  | 1.00 | 50.00 | . |
| ATOM | 786 | CA  | CA  | . GLY | GLY | . . | 109 | 109 | . 11.834 | 18.269 | 7.759  | 1.00 | 50.00 | . |
| ATOM | 787 | C   | C   | . GLY | GLY | . . | 109 | 109 | . 12.974 | 18.991 | 7.039  | 1.00 | 50.00 | . |
| ATOM | 788 | O   | O   | . GLY | GLY | . . | 109 | 109 | . 13.541 | 19.967 | 7.505  | 1.00 | 50.00 | . |
| ATOM | 789 | N   | N   | . GLU | GLU | . . | 110 | 110 | . 13.444 | 18.326 | 6.006  | 1.00 | 50.00 | . |
| ATOM | 790 | CA  | CA  | . GLU | GLU | . . | 110 | 110 | . 14.555 | 18.797 | 5.155  | 1.00 | 50.00 | . |
| ATOM | 791 | C   | C   | . GLU | GLU | . . | 110 | 110 | . 14.558 | 17.912 | 3.901  | 1.00 | 50.00 | . |
| ATOM | 792 | O   | O   | . GLU | GLU | . . | 110 | 110 | . 13.734 | 17.002 | 3.814  | 1.00 | 50.00 | . |
| ATOM | 793 | CB  | CB  | . GLU | GLU | . . | 110 | 110 | . 15.888 | 18.722 | 5.930  | 1.00 | 50.00 | . |
| ATOM | 794 | CG  | CG  | . GLU | GLU | . . | 110 | 110 | . 16.184 | 17.326 | 6.491  | 1.00 | 50.00 | . |
| ATOM | 795 | CD  | CD  | . GLU | GLU | . . | 110 | 110 | . 17.479 | 17.284 | 7.297  | 1.00 | 50.00 | . |
| ATOM | 796 | OE1 | OE1 | . GLU | GLU | . . | 110 | 110 | . 17.527 | 17.941 | 8.357  | 1.00 | 50.00 | . |
| ATOM | 797 | OE2 | OE2 | . GLU | GLU | . . | 110 | 110 | . 18.383 | 16.567 | 6.816  | 1.00 | 50.00 | . |
| ATOM | 798 | N   | N   | . ASP | ASP | . . | 111 | 111 | . 15.647 | 17.946 | 3.140  | 1.00 | 50.00 | . |
| ATOM | 799 | CA  | CA  | . ASP | ASP | . . | 111 | 111 | . 15.767 | 17.059 | 1.962  | 1.00 | 50.00 | . |
| ATOM | 800 | C   | C   | . ASP | ASP | . . | 111 | 111 | . 15.835 | 15.573 | 2.345  | 1.00 | 50.00 | . |
| ATOM | 801 | O   | O   | . ASP | ASP | . . | 111 | 111 | . 15.251 | 14.732 | 1.670  | 1.00 | 50.00 | . |
| ATOM | 802 | CB  | CB  | . ASP | ASP | . . | 111 | 111 | . 16.960 | 17.440 | 1.082  | 1.00 | 50.00 | . |
| ATOM | 803 | CG  | CG  | . ASP | ASP | . . | 111 | 111 | . 16.817 | 18.824 | 0.435  | 1.00 | 50.00 | . |
| ATOM | 804 | OD1 | OD1 | . ASP | ASP | . . | 111 | 111 | . 15.690 | 19.368 | 0.433  | 1.00 | 50.00 | . |
| ATOM | 805 | OD2 | OD2 | . ASP | ASP | . . | 111 | 111 | . 17.878 | 19.334 | 0.018  | 1.00 | 50.00 | . |
| ATOM | 806 | N   | N   | . GLY | GLY | . . | 112 | 112 | . 16.436 | 15.323 | 3.518  | 1.00 | 50.00 | . |
| ATOM | 807 | CA  | CA  | . GLY | GLY | . . | 112 | 112 | . 16.576 | 13.969 | 4.088  | 1.00 | 50.00 | . |
| ATOM | 808 | C   | C   | . GLY | GLY | . . | 112 | 112 | . 15.256 | 13.400 | 4.633  | 1.00 | 50.00 | . |
| ATOM | 809 | O   | O   | . GLY | GLY | . . | 112 | 112 | . 14.966 | 12.219 | 4.473  | 1.00 | 50.00 | . |
| ATOM | 810 | N   | N   | . GLU | GLU | . . | 113 | 113 | . 14.463 | 14.276 | 5.244  | 1.00 | 50.00 | . |
| ATOM | 811 | CA  | CA  | . GLU | GLU | . . | 113 | 113 | . 13.210 | 13.897 | 5.931  | 1.00 | 50.00 | . |
| ATOM | 812 | C   | C   | . GLU | GLU | . . | 113 | 113 | . 11.953 | 13.992 | 5.051  | 1.00 | 50.00 | . |
| ATOM | 813 | O   | O   | . GLU | GLU | . . | 113 | 113 | . 10.889 | 13.508 | 5.438  | 1.00 | 50.00 | . |
| ATOM | 814 | CB  | CB  | . GLU | GLU | . . | 113 | 113 | . 13.019 | 14.779 | 7.166  | 1.00 | 50.00 | . |
| ATOM | 815 | CG  | CG  | . GLU | GLU | . . | 113 | 113 | . 14.136 | 14.590 | 8.195  | 1.00 | 50.00 | . |
| ATOM | 816 | CD  | CD  | . GLU | GLU | . . | 113 | 113 | . 13.995 | 15.611 | 9.323  | 1.00 | 50.00 | . |
| ATOM | 817 | OE1 | OE1 | . GLU | GLU | . . | 113 | 113 | . 13.280 | 15.290 | 10.294 | 1.00 | 50.00 | . |
| ATOM | 818 | OE2 | OE2 | . GLU | GLU | . . | 113 | 113 | . 14.567 | 16.710 | 9.152  | 1.00 | 50.00 | . |
| ATOM | 819 | N   | N   | . GLY | GLY | . . | 114 | 114 | . 12.077 | 14.719 | 3.931  | 1.00 | 50.00 | . |
| ATOM | 820 | CA  | CA  | . GLY | GLY | . . | 114 | 114 | . 10.957 | 15.009 | 3.021  | 1.00 | 50.00 | . |
| ATOM | 821 | C   | C   | . GLY | GLY | . . | 114 | 114 | . 10.211 | 13.739 | 2.599  | 1.00 | 50.00 | . |
| ATOM | 822 | O   | O   | . GLY | GLY | . . | 114 | 114 | . 10.803 | 12.702 | 2.314  | 1.00 | 50.00 | . |
| ATOM | 823 | N   | N   | . ASP | ASP | . . | 115 | 115 | . 8.893  | 13.829 | 2.696  | 1.00 | 50.00 | . |
| ATOM | 824 | CA  | CA  | . ASP | ASP | . . | 115 | 115 | . 7.990  | 12.737 | 2.285  | 1.00 | 50.00 | . |
| ATOM | 825 | C   | C   | . ASP | ASP | . . | 115 | 115 | . 6.916  | 13.252 | 1.307  | 1.00 | 50.00 | . |
| ATOM | 826 | O   | O   | . ASP | ASP | . . | 115 | 115 | . 6.877  | 14.443 | 0.993  | 1.00 | 50.00 | . |
| ATOM | 827 | CB  | CB  | . ASP | ASP | . . | 115 | 115 | . 7.406  | 12.073 | 3.547  | 1.00 | 50.00 | . |
| ATOM | 828 | CG  | CG  | . ASP | ASP | . . | 115 | 115 | . 6.606  | 13.025 | 4.447  | 1.00 | 50.00 | . |

|      |     |     |     |       |     |     |     |     |          |        |        |      |       |   |
|------|-----|-----|-----|-------|-----|-----|-----|-----|----------|--------|--------|------|-------|---|
| ATOM | 829 | OD1 | OD1 | . ASP | ASP | . . | 115 | 115 | . 5.980  | 13.950 | 3.878  | 1.00 | 50.00 | . |
| ATOM | 830 | OD2 | OD2 | . ASP | ASP | . . | 115 | 115 | . 6.589  | 12.791 | 5.667  | 1.00 | 50.00 | . |
| ATOM | 831 | N   | N   | . ASP | ASP | . . | 116 | 116 | . 5.908  | 12.414 | 1.059  | 1.00 | 50.00 | . |
| ATOM | 832 | CA  | CA  | . ASP | ASP | . . | 116 | 116 | . 4.784  | 12.754 | 0.158  | 1.00 | 50.00 | . |
| ATOM | 833 | C   | C   | . ASP | ASP | . . | 116 | 116 | . 3.997  | 13.997 | 0.610  | 1.00 | 50.00 | . |
| ATOM | 834 | O   | O   | . ASP | ASP | . . | 116 | 116 | . 3.587  | 14.807 | -0.216 | 1.00 | 50.00 | . |
| ATOM | 835 | CB  | CB  | . ASP | ASP | . . | 116 | 116 | . 3.829  | 11.564 | 0.019  | 1.00 | 50.00 | . |
| ATOM | 836 | CG  | CG  | . ASP | ASP | . . | 116 | 116 | . 2.778  | 11.731 | -1.094 | 1.00 | 50.00 | . |
| ATOM | 837 | OD1 | OD1 | . ASP | ASP | . . | 116 | 116 | . 2.338  | 12.868 | -1.347 | 1.00 | 50.00 | . |
| ATOM | 838 | OD2 | OD2 | . ASP | ASP | . . | 116 | 116 | . 2.439  | 10.693 | -1.690 | 1.00 | 50.00 | . |
| ATOM | 839 | N   | N   | . LEU | LEU | . . | 117 | 117 | . 3.906  | 14.213 | 1.915  | 1.00 | 50.00 | . |
| ATOM | 840 | CA  | CA  | . LEU | LEU | . . | 117 | 117 | . 3.176  | 15.371 | 2.462  | 1.00 | 50.00 | . |
| ATOM | 841 | C   | C   | . LEU | LEU | . . | 117 | 117 | . 3.818  | 16.733 | 2.104  | 1.00 | 50.00 | . |
| ATOM | 842 | O   | O   | . LEU | LEU | . . | 117 | 117 | . 3.348  | 17.791 | 2.513  | 1.00 | 50.00 | . |
| ATOM | 843 | CB  | CB  | . LEU | LEU | . . | 117 | 117 | . 3.045  | 15.230 | 3.978  | 1.00 | 50.00 | . |
| ATOM | 844 | CG  | CG  | . LEU | LEU | . . | 117 | 117 | . 2.152  | 14.146 | 4.592  | 1.00 | 50.00 | . |
| ATOM | 845 | CD1 | CD1 | . LEU | LEU | . . | 117 | 117 | . 2.619  | 12.724 | 4.274  | 1.00 | 50.00 | . |
| ATOM | 846 | CD2 | CD2 | . LEU | LEU | . . | 117 | 117 | . 2.150  | 14.319 | 6.112  | 1.00 | 50.00 | . |
| ATOM | 847 | N   | N   | . ASP | ASP | . . | 118 | 118 | . 4.986  | 16.696 | 1.464  | 1.00 | 50.00 | . |
| ATOM | 848 | CA  | CA  | . ASP | ASP | . . | 118 | 118 | . 5.628  | 17.908 | 0.923  | 1.00 | 50.00 | . |
| ATOM | 849 | C   | C   | . ASP | ASP | . . | 118 | 118 | . 5.171  | 18.285 | -0.493 | 1.00 | 50.00 | . |
| ATOM | 850 | O   | O   | . ASP | ASP | . . | 118 | 118 | . 5.538  | 19.348 | -0.986 | 1.00 | 50.00 | . |
| ATOM | 851 | CB  | CB  | . ASP | ASP | . . | 118 | 118 | . 7.153  | 17.775 | 0.961  | 1.00 | 50.00 | . |
| ATOM | 852 | CG  | CG  | . ASP | ASP | . . | 118 | 118 | . 7.704  | 17.726 | 2.385  | 1.00 | 50.00 | . |
| ATOM | 853 | OD1 | OD1 | . ASP | ASP | . . | 118 | 118 | . 7.069  | 18.308 | 3.287  | 1.00 | 50.00 | . |
| ATOM | 854 | OD2 | OD2 | . ASP | ASP | . . | 118 | 118 | . 8.710  | 17.017 | 2.580  | 1.00 | 50.00 | . |
| ATOM | 855 | N   | N   | . LEU | LEU | . . | 119 | 119 | . 4.513  | 17.357 | -1.183 | 1.00 | 50.00 | . |
| ATOM | 856 | CA  | CA  | . LEU | LEU | . . | 119 | 119 | . 4.108  | 17.578 | -2.582 | 1.00 | 50.00 | . |
| ATOM | 857 | C   | C   | . LEU | LEU | . . | 119 | 119 | . 2.854  | 18.448 | -2.686 | 1.00 | 50.00 | . |
| ATOM | 858 | O   | O   | . LEU | LEU | . . | 119 | 119 | . 1.839  | 18.245 | -2.015 | 1.00 | 50.00 | . |
| ATOM | 859 | CB  | CB  | . LEU | LEU | . . | 119 | 119 | . 3.874  | 16.273 | -3.352 | 1.00 | 50.00 | . |
| ATOM | 860 | CG  | CG  | . LEU | LEU | . . | 119 | 119 | . 5.074  | 15.423 | -3.748 | 1.00 | 50.00 | . |
| ATOM | 861 | CD1 | CD1 | . LEU | LEU | . . | 119 | 119 | . 5.861  | 15.037 | -2.507 | 1.00 | 50.00 | . |
| ATOM | 862 | CD2 | CD2 | . LEU | LEU | . . | 119 | 119 | . 4.592  | 14.158 | -4.463 | 1.00 | 50.00 | . |
| ATOM | 863 | N   | N   | . TRP | TRP | . . | 120 | 120 | . 2.964  | 19.373 | -3.622 | 1.00 | 50.00 | . |
| ATOM | 864 | CA  | CA  | . TRP | TRP | . . | 120 | 120 | . 1.875  | 20.294 | -3.981 | 1.00 | 50.00 | . |
| ATOM | 865 | C   | C   | . TRP | TRP | . . | 120 | 120 | . 1.718  | 20.283 | -5.500 | 1.00 | 50.00 | . |
| ATOM | 866 | O   | O   | . TRP | TRP | . . | 120 | 120 | . 2.705  | 20.357 | -6.230 | 1.00 | 50.00 | . |
| ATOM | 867 | CB  | CB  | . TRP | TRP | . . | 120 | 120 | . 2.217  | 21.719 | -3.532 | 1.00 | 50.00 | . |
| ATOM | 868 | CG  | CG  | . TRP | TRP | . . | 120 | 120 | . 2.394  | 21.826 | -2.018 | 1.00 | 50.00 | . |
| ATOM | 869 | CD1 | CD1 | . TRP | TRP | . . | 120 | 120 | . 3.509  | 21.556 | -1.344 | 1.00 | 50.00 | . |
| ATOM | 870 | CD2 | CD2 | . TRP | TRP | . . | 120 | 120 | . 1.435  | 22.212 | -1.098 | 1.00 | 50.00 | . |
| ATOM | 871 | NE1 | NE1 | . TRP | TRP | . . | 120 | 120 | . 3.307  | 21.748 | -0.043 | 1.00 | 50.00 | . |
| ATOM | 872 | CE2 | CE2 | . TRP | TRP | . . | 120 | 120 | . 2.055  | 22.160 | 0.138  | 1.00 | 50.00 | . |
| ATOM | 873 | CE3 | CE3 | . TRP | TRP | . . | 120 | 120 | . 0.126  | 22.662 | -1.219 | 1.00 | 50.00 | . |
| ATOM | 874 | CZ2 | CZ2 | . TRP | TRP | . . | 120 | 120 | . 1.365  | 22.575 | 1.262  | 1.00 | 50.00 | . |
| ATOM | 875 | CZ3 | CZ3 | . TRP | TRP | . . | 120 | 120 | . -0.568 | 23.076 | -0.090 | 1.00 | 50.00 | . |
| ATOM | 876 | CH2 | CH2 | . TRP | TRP | . . | 120 | 120 | . 0.057  | 23.037 | 1.149  | 1.00 | 50.00 | . |
| ATOM | 877 | N   | N   | . THR | THR | . . | 121 | 121 | . 0.473  | 20.202 | -5.942 | 1.00 | 50.00 | . |
| ATOM | 878 | CA  | CA  | . THR | THR | . . | 121 | 121 | . 0.136  | 20.250 | -7.376 | 1.00 | 50.00 | . |
| ATOM | 879 | C   | C   | . THR | THR | . . | 121 | 121 | . -0.016 | 21.722 | -7.767 | 1.00 | 50.00 | . |
| ATOM | 880 | O   | O   | . THR | THR | . . | 121 | 121 | . -0.797 | 22.459 | -7.160 | 1.00 | 50.00 | . |
| ATOM | 881 | CB  | CB  | . THR | THR | . . | 121 | 121 | . -1.173 | 19.494 | -7.657 | 1.00 | 50.00 | . |
| ATOM | 882 | OG1 | OG1 | . THR | THR | . . | 121 | 121 | . -1.050 | 18.146 | -7.197 | 1.00 | 50.00 | . |
| ATOM | 883 | CG2 | CG2 | . THR | THR | . . | 121 | 121 | . -1.545 | 19.497 | -9.145 | 1.00 | 50.00 | . |
| ATOM | 884 | N   | N   | . VAL | VAL | . . | 122 | 122 | . 0.736  | 22.099 | -8.794 | 1.00 | 50.00 | . |
| ATOM | 885 | CA  | CA  | . VAL | VAL | . . | 122 | 122 | . 0.670  | 23.459 | -9.362 | 1.00 | 50.00 | . |

|      |     |     |     |   |     |     |   |   |     |     |   |        |        |         |      |       |   |
|------|-----|-----|-----|---|-----|-----|---|---|-----|-----|---|--------|--------|---------|------|-------|---|
| ATOM | 886 | C   | C   | . | VAL | VAL | . | . | 122 | 122 | . | -0.569 | 23.536 | -10.268 | 1.00 | 50.00 | . |
| ATOM | 887 | O   | O   | . | VAL | VAL | . | . | 122 | 122 | . | -0.653 | 22.839 | -11.279 | 1.00 | 50.00 | . |
| ATOM | 888 | CB  | CB  | . | VAL | VAL | . | . | 122 | 122 | . | 1.944  | 23.796 | -10.161 | 1.00 | 50.00 | . |
| ATOM | 889 | CG1 | CG1 | . | VAL | VAL | . | . | 122 | 122 | . | 1.947  | 25.257 | -10.619 | 1.00 | 50.00 | . |
| ATOM | 890 | CG2 | CG2 | . | VAL | VAL | . | . | 122 | 122 | . | 3.219  | 23.545 | -9.354  | 1.00 | 50.00 | . |
| ATOM | 891 | N   | N   | . | ARG | ARG | . | . | 123 | 123 | . | -1.477 | 24.437 | -9.918  | 1.00 | 50.00 | . |
| ATOM | 892 | CA  | CA  | . | ARG | ARG | . | . | 123 | 123 | . | -2.715 | 24.640 | -10.691 | 1.00 | 50.00 | . |
| ATOM | 893 | C   | C   | . | ARG | ARG | . | . | 123 | 123 | . | -2.682 | 25.940 | -11.496 | 1.00 | 50.00 | . |
| ATOM | 894 | O   | O   | . | ARG | ARG | . | . | 123 | 123 | . | -3.079 | 27.008 | -11.024 | 1.00 | 50.00 | . |
| ATOM | 895 | CB  | CB  | . | ARG | ARG | . | . | 123 | 123 | . | -3.922 | 24.667 | -9.762  | 1.00 | 50.00 | . |
| ATOM | 896 | CG  | CG  | . | ARG | ARG | . | . | 123 | 123 | . | -4.136 | 23.321 | -9.084  | 1.00 | 50.00 | . |
| ATOM | 897 | CD  | CD  | . | ARG | ARG | . | . | 123 | 123 | . | -5.348 | 23.444 | -8.175  | 1.00 | 50.00 | . |
| ATOM | 898 | NE  | NE  | . | ARG | ARG | . | . | 123 | 123 | . | -6.598 | 23.699 | -8.924  | 1.00 | 50.00 | . |
| ATOM | 899 | CZ  | CZ  | . | ARG | ARG | . | . | 123 | 123 | . | -7.359 | 22.771 | -9.511  | 1.00 | 50.00 | . |
| ATOM | 900 | NH1 | NH1 | . | ARG | ARG | . | . | 123 | 123 | . | -7.040 | 21.484 | -9.446  | 1.00 | 50.00 | . |
| ATOM | 901 | NH2 | NH2 | . | ARG | ARG | . | . | 123 | 123 | . | -8.445 | 23.119 | -10.187 | 1.00 | 50.00 | . |
| ATOM | 902 | N   | N   | . | CYS | CYS | . | . | 124 | 124 | . | -2.082 | 25.823 | -12.672 | 1.00 | 50.00 | . |
| ATOM | 903 | CA  | CA  | . | CYS | CYS | . | . | 124 | 124 | . | -2.046 | 26.920 | -13.653 | 1.00 | 50.00 | . |
| ATOM | 904 | C   | C   | . | CYS | CYS | . | . | 124 | 124 | . | -2.669 | 26.498 | -14.988 | 1.00 | 50.00 | . |
| ATOM | 905 | O   | O   | . | CYS | CYS | . | . | 124 | 124 | . | -2.792 | 25.310 | -15.281 | 1.00 | 50.00 | . |
| ATOM | 906 | CB  | CB  | . | CYS | CYS | . | . | 124 | 124 | . | -0.624 | 27.475 | -13.820 | 1.00 | 50.00 | . |
| ATOM | 907 | SG  | SG  | . | CYS | CYS | . | . | 124 | 124 | . | 0.724  | 26.273 | -14.126 | 1.00 | 50.00 | . |
| ATOM | 908 | N   | N   | . | SER | SER | . | . | 125 | 125 | . | -3.178 | 27.488 | -15.706 | 1.00 | 50.00 | . |
| ATOM | 909 | CA  | CA  | . | SER | SER | . | . | 125 | 125 | . | -3.803 | 27.276 | -17.027 | 1.00 | 50.00 | . |
| ATOM | 910 | C   | C   | . | SER | SER | . | . | 125 | 125 | . | -2.743 | 27.057 | -18.110 | 1.00 | 50.00 | . |
| ATOM | 911 | O   | O   | . | SER | SER | . | . | 125 | 125 | . | -1.630 | 27.580 | -18.029 | 1.00 | 50.00 | . |
| ATOM | 912 | CB  | CB  | . | SER | SER | . | . | 125 | 125 | . | -4.700 | 28.456 | -17.403 | 1.00 | 50.00 | . |
| ATOM | 913 | OG  | OG  | . | SER | SER | . | . | 125 | 125 | . | -5.761 | 28.552 | -16.450 | 1.00 | 50.00 | . |
| ATOM | 914 | N   | N   | . | GLY | GLY | . | . | 126 | 126 | . | -3.141 | 26.287 | -19.128 | 1.00 | 50.00 | . |
| ATOM | 915 | CA  | CA  | . | GLY | GLY | . | . | 126 | 126 | . | -2.208 | 25.841 | -20.180 | 1.00 | 50.00 | . |
| ATOM | 916 | C   | C   | . | GLY | GLY | . | . | 126 | 126 | . | -1.390 | 24.676 | -19.613 | 1.00 | 50.00 | . |
| ATOM | 917 | O   | O   | . | GLY | GLY | . | . | 126 | 126 | . | -1.897 | 23.883 | -18.821 | 1.00 | 50.00 | . |
| ATOM | 918 | N   | N   | . | GLN | GLN | . | . | 127 | 127 | . | -0.120 | 24.612 | -19.989 | 1.00 | 50.00 | . |
| ATOM | 919 | CA  | CA  | . | GLN | GLN | . | . | 127 | 127 | . | 0.751  | 23.521 | -19.508 | 1.00 | 50.00 | . |
| ATOM | 920 | C   | C   | . | GLN | GLN | . | . | 127 | 127 | . | 2.226  | 23.924 | -19.448 | 1.00 | 50.00 | . |
| ATOM | 921 | O   | O   | . | GLN | GLN | . | . | 127 | 127 | . | 3.078  | 23.401 | -20.164 | 1.00 | 50.00 | . |
| ATOM | 922 | CB  | CB  | . | GLN | GLN | . | . | 127 | 127 | . | 0.547  | 22.271 | -20.370 | 1.00 | 50.00 | . |
| ATOM | 923 | CG  | CG  | . | GLN | GLN | . | . | 127 | 127 | . | 1.299  | 21.087 | -19.761 | 1.00 | 50.00 | . |
| ATOM | 924 | CD  | CD  | . | GLN | GLN | . | . | 127 | 127 | . | 1.157  | 19.839 | -20.613 | 1.00 | 50.00 | . |
| ATOM | 925 | OE1 | OE1 | . | GLN | GLN | . | . | 127 | 127 | . | 1.475  | 19.776 | -21.792 | 1.00 | 50.00 | . |
| ATOM | 926 | NE2 | NE2 | . | GLN | GLN | . | . | 127 | 127 | . | 0.651  | 18.817 | -19.969 | 1.00 | 50.00 | . |
| ATOM | 927 | N   | N   | . | HIS | HIS | . | . | 128 | 128 | . | 2.471  | 24.942 | -18.635 | 1.00 | 50.00 | . |
| ATOM | 928 | CA  | CA  | . | HIS | HIS | . | . | 128 | 128 | . | 3.827  | 25.480 | -18.444 | 1.00 | 50.00 | . |
| ATOM | 929 | C   | C   | . | HIS | HIS | . | . | 128 | 128 | . | 3.711  | 26.677 | -17.510 | 1.00 | 50.00 | . |
| ATOM | 930 | O   | O   | . | HIS | HIS | . | . | 128 | 128 | . | 3.172  | 27.691 | -17.912 | 1.00 | 50.00 | . |
| ATOM | 931 | CB  | CB  | . | HIS | HIS | . | . | 128 | 128 | . | 4.453  | 25.868 | -19.803 | 1.00 | 50.00 | . |
| ATOM | 932 | CG  | CG  | . | HIS | HIS | . | . | 128 | 128 | . | 3.703  | 26.874 | -20.689 | 1.00 | 50.00 | . |
| ATOM | 933 | ND1 | ND1 | . | HIS | HIS | . | . | 128 | 128 | . | 2.540  | 26.678 | -21.287 | 1.00 | 50.00 | . |
| ATOM | 934 | CD2 | CD2 | . | HIS | HIS | . | . | 128 | 128 | . | 4.153  | 28.049 | -21.146 | 1.00 | 50.00 | . |
| ATOM | 935 | CE1 | CE1 | . | HIS | HIS | . | . | 128 | 128 | . | 2.258  | 27.739 | -22.044 | 1.00 | 50.00 | . |
| ATOM | 936 | NE2 | NE2 | . | HIS | HIS | . | . | 128 | 128 | . | 3.271  | 28.597 | -21.957 | 1.00 | 50.00 | . |
| ATOM | 937 | N   | N   | . | TRP | TRP | . | . | 129 | 129 | . | 3.960  | 26.491 | -16.230 | 1.00 | 50.00 | . |
| ATOM | 938 | CA  | CA  | . | TRP | TRP | . | . | 129 | 129 | . | 3.842  | 27.553 | -15.219 | 1.00 | 50.00 | . |
| ATOM | 939 | C   | C   | . | TRP | TRP | . | . | 129 | 129 | . | 4.607  | 28.833 | -15.597 | 1.00 | 50.00 | . |
| ATOM | 940 | O   | O   | . | TRP | TRP | . | . | 129 | 129 | . | 5.832  | 28.853 | -15.612 | 1.00 | 50.00 | . |
| ATOM | 941 | CB  | CB  | . | TRP | TRP | . | . | 129 | 129 | . | 4.372  | 26.970 | -13.913 | 1.00 | 50.00 | . |
| ATOM | 942 | CG  | CG  | . | TRP | TRP | . | . | 129 | 129 | . | 4.269  | 27.878 | -12.692 | 1.00 | 50.00 | . |

|      |     |     |     |       |     |     |     |     |          |        |         |      |       |   |
|------|-----|-----|-----|-------|-----|-----|-----|-----|----------|--------|---------|------|-------|---|
| ATOM | 943 | CD1 | CD1 | . TRP | TRP | . . | 129 | 129 | . 3.570  | 29.007 | -12.619 | 1.00 | 50.00 | . |
| ATOM | 944 | CD2 | CD2 | . TRP | TRP | . . | 129 | 129 | . 4.726  | 27.582 | -11.413 | 1.00 | 50.00 | . |
| ATOM | 945 | NE1 | NE1 | . TRP | TRP | . . | 129 | 129 | . 3.549  | 29.433 | -11.363 | 1.00 | 50.00 | . |
| ATOM | 946 | CE2 | CE2 | . TRP | TRP | . . | 129 | 129 | . 4.244  | 28.591 | -10.605 | 1.00 | 50.00 | . |
| ATOM | 947 | CE3 | CE3 | . TRP | TRP | . . | 129 | 129 | . 5.496  | 26.573 | -10.846 | 1.00 | 50.00 | . |
| ATOM | 948 | CZ2 | CZ2 | . TRP | TRP | . . | 129 | 129 | . 4.545  | 28.582 | -9.254  | 1.00 | 50.00 | . |
| ATOM | 949 | CZ3 | CZ3 | . TRP | TRP | . . | 129 | 129 | . 5.822  | 26.571 | -9.504  | 1.00 | 50.00 | . |
| ATOM | 950 | CH2 | CH2 | . TRP | TRP | . . | 129 | 129 | . 5.335  | 27.583 | -8.694  | 1.00 | 50.00 | . |
| ATOM | 951 | N   | N   | . GLU | GLU | . . | 130 | 130 | . 3.862  | 29.870 | -15.962 | 1.00 | 50.00 | . |
| ATOM | 952 | CA  | CA  | . GLU | GLU | . . | 130 | 130 | . 4.427  | 31.160 | -16.401 | 1.00 | 50.00 | . |
| ATOM | 953 | C   | C   | . GLU | GLU | . . | 130 | 130 | . 4.502  | 32.072 | -15.180 | 1.00 | 50.00 | . |
| ATOM | 954 | O   | O   | . GLU | GLU | . . | 130 | 130 | . 3.547  | 32.172 | -14.408 | 1.00 | 50.00 | . |
| ATOM | 955 | CB  | CB  | . GLU | GLU | . . | 130 | 130 | . 3.603  | 31.886 | -17.483 | 1.00 | 50.00 | . |
| ATOM | 956 | CG  | CG  | . GLU | GLU | . . | 130 | 130 | . 3.322  | 31.093 | -18.770 | 1.00 | 50.00 | . |
| ATOM | 957 | CD  | CD  | . GLU | GLU | . . | 130 | 130 | . 2.236  | 30.018 | -18.601 | 1.00 | 50.00 | . |
| ATOM | 958 | OE1 | OE1 | . GLU | GLU | . . | 130 | 130 | . 1.649  | 29.900 | -17.506 | 1.00 | 50.00 | . |
| ATOM | 959 | OE2 | OE2 | . GLU | GLU | . . | 130 | 130 | . 1.953  | 29.314 | -19.586 | 1.00 | 50.00 | . |
| ATOM | 960 | N   | N   | . ARG | ARG | . . | 131 | 131 | . 5.592  | 32.826 | -15.128 | 1.00 | 50.00 | . |
| ATOM | 961 | CA  | CA  | . ARG | ARG | . . | 131 | 131 | . 5.839  | 33.786 | -14.033 | 1.00 | 50.00 | . |
| ATOM | 962 | C   | C   | . ARG | ARG | . . | 131 | 131 | . 4.807  | 34.932 | -13.981 | 1.00 | 50.00 | . |
| ATOM | 963 | O   | O   | . ARG | ARG | . . | 131 | 131 | . 4.634  | 35.583 | -12.955 | 1.00 | 50.00 | . |
| ATOM | 964 | CB  | CB  | . ARG | ARG | . . | 131 | 131 | . 7.258  | 34.338 | -14.169 | 1.00 | 50.00 | . |
| ATOM | 965 | CG  | CG  | . ARG | ARG | . . | 131 | 131 | . 7.637  | 35.253 | -12.999 | 1.00 | 50.00 | . |
| ATOM | 966 | CD  | CD  | . ARG | ARG | . . | 131 | 131 | . 9.038  | 35.834 | -13.173 | 1.00 | 50.00 | . |
| ATOM | 967 | NE  | NE  | . ARG | ARG | . . | 131 | 131 | . 10.032 | 34.756 | -13.030 | 1.00 | 50.00 | . |
| ATOM | 968 | CZ  | CZ  | . ARG | ARG | . . | 131 | 131 | . 10.514 | 34.279 | -11.880 | 1.00 | 50.00 | . |
| ATOM | 969 | NH1 | NH1 | . ARG | ARG | . . | 131 | 131 | . 10.118 | 34.763 | -10.709 | 1.00 | 50.00 | . |
| ATOM | 970 | NH2 | NH2 | . ARG | ARG | . . | 131 | 131 | . 11.411 | 33.306 | -11.896 | 1.00 | 50.00 | . |
| ATOM | 971 | N   | N   | . GLU | GLU | . . | 132 | 132 | . 4.081  | 35.118 | -15.077 | 1.00 | 50.00 | . |
| ATOM | 972 | CA  | CA  | . GLU | GLU | . . | 132 | 132 | . 3.101  | 36.210 | -15.199 | 1.00 | 50.00 | . |
| ATOM | 973 | C   | C   | . GLU | GLU | . . | 132 | 132 | . 1.646  | 35.805 | -14.924 | 1.00 | 50.00 | . |
| ATOM | 974 | O   | O   | . GLU | GLU | . . | 132 | 132 | . 0.709  | 36.587 | -15.094 | 1.00 | 50.00 | . |
| ATOM | 975 | CB  | CB  | . GLU | GLU | . . | 132 | 132 | . 3.212  | 36.734 | -16.619 | 1.00 | 50.00 | . |
| ATOM | 976 | CG  | CG  | . GLU | GLU | . . | 132 | 132 | . 2.472  | 38.043 | -16.824 | 1.00 | 50.00 | . |
| ATOM | 977 | CD  | CD  | . GLU | GLU | . . | 132 | 132 | . 2.736  | 39.196 | -15.856 | 1.00 | 50.00 | . |
| ATOM | 978 | OE1 | OE1 | . GLU | GLU | . . | 132 | 132 | . 3.858  | 39.247 | -15.313 | 1.00 | 50.00 | . |
| ATOM | 979 | OE2 | OE2 | . GLU | GLU | . . | 132 | 132 | . 1.826  | 40.044 | -15.737 | 1.00 | 50.00 | . |
| ATOM | 980 | N   | N   | . ALA | ALA | . . | 133 | 133 | . 1.464  | 34.571 | -14.495 | 1.00 | 50.00 | . |
| ATOM | 981 | CA  | CA  | . ALA | ALA | . . | 133 | 133 | . 0.110  | 34.059 | -14.272 | 1.00 | 50.00 | . |
| ATOM | 982 | C   | C   | . ALA | ALA | . . | 133 | 133 | . -0.124 | 33.789 | -12.786 | 1.00 | 50.00 | . |
| ATOM | 983 | O   | O   | . ALA | ALA | . . | 133 | 133 | . 0.802  | 33.489 | -12.032 | 1.00 | 50.00 | . |
| ATOM | 984 | CB  | CB  | . ALA | ALA | . . | 133 | 133 | . -0.086 | 32.792 | -15.106 | 1.00 | 50.00 | . |
| ATOM | 985 | N   | N   | . ALA | ALA | . . | 134 | 134 | . -1.368 | 34.030 | -12.393 | 1.00 | 50.00 | . |
| ATOM | 986 | CA  | CA  | . ALA | ALA | . . | 134 | 134 | . -1.874 | 33.600 | -11.081 | 1.00 | 50.00 | . |
| ATOM | 987 | C   | C   | . ALA | ALA | . . | 134 | 134 | . -2.032 | 32.071 | -11.098 | 1.00 | 50.00 | . |
| ATOM | 988 | O   | O   | . ALA | ALA | . . | 134 | 134 | . -2.155 | 31.458 | -12.160 | 1.00 | 50.00 | . |
| ATOM | 989 | CB  | CB  | . ALA | ALA | . . | 134 | 134 | . -3.217 | 34.281 | -10.830 | 1.00 | 50.00 | . |
| ATOM | 990 | N   | N   | . VAL | VAL | . . | 135 | 135 | . -2.013 | 31.482 | -9.911  | 1.00 | 50.00 | . |
| ATOM | 991 | CA  | CA  | . VAL | VAL | . . | 135 | 135 | . -1.976 | 30.015 | -9.735  | 1.00 | 50.00 | . |
| ATOM | 992 | C   | C   | . VAL | VAL | . . | 135 | 135 | . -2.360 | 29.634 | -8.294  | 1.00 | 50.00 | . |
| ATOM | 993 | O   | O   | . VAL | VAL | . . | 135 | 135 | . -2.295 | 30.461 | -7.384  | 1.00 | 50.00 | . |
| ATOM | 994 | CB  | CB  | . VAL | VAL | . . | 135 | 135 | . -0.582 | 29.494 | -10.172 | 1.00 | 50.00 | . |
| ATOM | 995 | CG1 | CG1 | . VAL | VAL | . . | 135 | 135 | . 0.578  | 30.230 | -9.490  | 1.00 | 50.00 | . |
| ATOM | 996 | CG2 | CG2 | . VAL | VAL | . . | 135 | 135 | . -0.392 | 27.982 | -10.026 | 1.00 | 50.00 | . |
| ATOM | 997 | N   | N   | . ARG | ARG | . . | 136 | 136 | . -2.831 | 28.399 | -8.170  | 1.00 | 50.00 | . |
| ATOM | 998 | CA  | CA  | . ARG | ARG | . . | 136 | 136 | . -3.198 | 27.766 | -6.891  | 1.00 | 50.00 | . |
| ATOM | 999 | C   | C   | . ARG | ARG | . . | 136 | 136 | . -2.427 | 26.449 | -6.683  | 1.00 | 50.00 | . |

|      |      |     |     |       |     |     |     |     |          |        |        |      |       |   |
|------|------|-----|-----|-------|-----|-----|-----|-----|----------|--------|--------|------|-------|---|
| ATOM | 1000 | O   | O   | . ARG | ARG | . . | 136 | 136 | . -1.784 | 25.965 | -7.608 | 1.00 | 50.00 | . |
| ATOM | 1001 | CB  | CB  | . ARG | ARG | . . | 136 | 136 | . -4.672 | 27.417 | -6.851 | 1.00 | 50.00 | . |
| ATOM | 1002 | CG  | CG  | . ARG | ARG | . . | 136 | 136 | . -5.547 | 28.658 | -7.007 | 1.00 | 50.00 | . |
| ATOM | 1003 | CD  | CD  | . ARG | ARG | . . | 136 | 136 | . -6.992 | 28.289 | -6.684 | 1.00 | 50.00 | . |
| ATOM | 1004 | NE  | NE  | . ARG | ARG | . . | 136 | 136 | . -7.513 | 27.281 | -7.618 | 1.00 | 50.00 | . |
| ATOM | 1005 | CZ  | CZ  | . ARG | ARG | . . | 136 | 136 | . -8.096 | 27.582 | -8.774 | 1.00 | 50.00 | . |
| ATOM | 1006 | NH1 | NH1 | . ARG | ARG | . . | 136 | 136 | . -8.243 | 28.848 | -9.146 | 1.00 | 50.00 | . |
| ATOM | 1007 | NH2 | NH2 | . ARG | ARG | . . | 136 | 136 | . -8.554 | 26.619 | -9.554 | 1.00 | 50.00 | . |
| ATOM | 1008 | N   | N   | . PHE | PHE | . . | 137 | 137 | . -2.192 | 26.193 | -5.407 | 1.00 | 50.00 | . |
| ATOM | 1009 | CA  | CA  | . PHE | PHE | . . | 137 | 137 | . -1.315 | 25.070 | -4.980 | 1.00 | 50.00 | . |
| ATOM | 1010 | C   | C   | . PHE | PHE | . . | 137 | 137 | . -2.155 | 24.145 | -4.119 | 1.00 | 50.00 | . |
| ATOM | 1011 | O   | O   | . PHE | PHE | . . | 137 | 137 | . -2.672 | 24.533 | -3.071 | 1.00 | 50.00 | . |
| ATOM | 1012 | CB  | CB  | . PHE | PHE | . . | 137 | 137 | . -0.081 | 25.554 | -4.204 | 1.00 | 50.00 | . |
| ATOM | 1013 | CG  | CG  | . PHE | PHE | . . | 137 | 137 | . 0.914  | 26.405 | -5.013 | 1.00 | 50.00 | . |
| ATOM | 1014 | CD1 | CD1 | . PHE | PHE | . . | 137 | 137 | . 0.485  | 27.248 | -6.024 | 1.00 | 50.00 | . |
| ATOM | 1015 | CD2 | CD2 | . PHE | PHE | . . | 137 | 137 | . 2.278  | 26.374 | -4.744 | 1.00 | 50.00 | . |
| ATOM | 1016 | CE1 | CE1 | . PHE | PHE | . . | 137 | 137 | . 1.327  | 28.010 | -6.775 | 1.00 | 50.00 | . |
| ATOM | 1017 | CE2 | CE2 | . PHE | PHE | . . | 137 | 137 | . 3.145  | 27.171 | -5.490 | 1.00 | 50.00 | . |
| ATOM | 1018 | CZ  | CZ  | . PHE | PHE | . . | 137 | 137 | . 2.671  | 27.989 | -6.504 | 1.00 | 50.00 | . |
| ATOM | 1019 | N   | N   | . GLN | GLN | . . | 138 | 138 | . -2.380 | 22.970 | -4.682 | 1.00 | 50.00 | . |
| ATOM | 1020 | CA  | CA  | . GLN | GLN | . . | 138 | 138 | . -3.244 | 21.976 | -4.040 | 1.00 | 50.00 | . |
| ATOM | 1021 | C   | C   | . GLN | GLN | . . | 138 | 138 | . -2.370 | 20.848 | -3.503 | 1.00 | 50.00 | . |
| ATOM | 1022 | O   | O   | . GLN | GLN | . . | 138 | 138 | . -1.686 | 20.156 | -4.254 | 1.00 | 50.00 | . |
| ATOM | 1023 | CB  | CB  | . GLN | GLN | . . | 138 | 138 | . -4.245 | 21.462 | -5.069 | 1.00 | 50.00 | . |
| ATOM | 1024 | CG  | CG  | . GLN | GLN | . . | 138 | 138 | . -5.229 | 20.476 | -4.442 | 1.00 | 50.00 | . |
| ATOM | 1025 | CD  | CD  | . GLN | GLN | . . | 138 | 138 | . -6.251 | 19.945 | -5.446 | 1.00 | 50.00 | . |
| ATOM | 1026 | OE1 | OE1 | . GLN | GLN | . . | 138 | 138 | . -6.277 | 20.252 | -6.628 | 1.00 | 50.00 | . |
| ATOM | 1027 | NE2 | NE2 | . GLN | GLN | . . | 138 | 138 | . -7.115 | 19.087 | -4.970 | 1.00 | 50.00 | . |
| ATOM | 1028 | N   | N   | . HIS | HIS | . . | 139 | 139 | . -2.395 | 20.714 | -2.184 | 1.00 | 50.00 | . |
| ATOM | 1029 | CA  | CA  | . HIS | HIS | . . | 139 | 139 | . -1.660 | 19.652 | -1.481 | 1.00 | 50.00 | . |
| ATOM | 1030 | C   | C   | . HIS | HIS | . . | 139 | 139 | . -2.073 | 18.307 | -2.084 | 1.00 | 50.00 | . |
| ATOM | 1031 | O   | O   | . HIS | HIS | . . | 139 | 139 | . -3.244 | 17.944 | -2.043 | 1.00 | 50.00 | . |
| ATOM | 1032 | CB  | CB  | . HIS | HIS | . . | 139 | 139 | . -2.022 | 19.680 | 0.005  | 1.00 | 50.00 | . |
| ATOM | 1033 | CG  | CG  | . HIS | HIS | . . | 139 | 139 | . -1.113 | 18.772 | 0.835  | 1.00 | 50.00 | . |
| ATOM | 1034 | ND1 | ND1 | . HIS | HIS | . . | 139 | 139 | . -1.504 | 17.843 | 1.703  | 1.00 | 50.00 | . |
| ATOM | 1035 | CD2 | CD2 | . HIS | HIS | . . | 139 | 139 | . 0.212  | 18.836 | 0.879  | 1.00 | 50.00 | . |
| ATOM | 1036 | CE1 | CE1 | . HIS | HIS | . . | 139 | 139 | . -0.438 | 17.318 | 2.285  | 1.00 | 50.00 | . |
| ATOM | 1037 | NE2 | NE2 | . HIS | HIS | . . | 139 | 139 | . 0.611  | 17.935 | 1.768  | 1.00 | 50.00 | . |
| ATOM | 1038 | N   | N   | . VAL | VAL | . . | 140 | 140 | . -1.091 | 17.563 | -2.568 | 1.00 | 50.00 | . |
| ATOM | 1039 | CA  | CA  | . VAL | VAL | . . | 140 | 140 | . -1.346 | 16.280 | -3.260 | 1.00 | 50.00 | . |
| ATOM | 1040 | C   | C   | . VAL | VAL | . . | 140 | 140 | . -2.070 | 15.253 | -2.360 | 1.00 | 50.00 | . |
| ATOM | 1041 | O   | O   | . VAL | VAL | . . | 140 | 140 | . -3.033 | 14.617 | -2.775 | 1.00 | 50.00 | . |
| ATOM | 1042 | CB  | CB  | . VAL | VAL | . . | 140 | 140 | . -0.017 | 15.714 | -3.795 | 1.00 | 50.00 | . |
| ATOM | 1043 | CG1 | CG1 | . VAL | VAL | . . | 140 | 140 | . 0.919  | 15.293 | -2.662 | 1.00 | 50.00 | . |
| ATOM | 1044 | CG2 | CG2 | . VAL | VAL | . . | 140 | 140 | . -0.227 | 14.522 | -4.732 | 1.00 | 50.00 | . |
| ATOM | 1045 | N   | N   | . GLY | GLY | . . | 141 | 141 | . -1.568 | 15.155 | -1.119 | 1.00 | 50.00 | . |
| ATOM | 1046 | CA  | CA  | . GLY | GLY | . . | 141 | 141 | . -1.957 | 14.100 | -0.169 | 1.00 | 50.00 | . |
| ATOM | 1047 | C   | C   | . GLY | GLY | . . | 141 | 141 | . -3.386 | 14.291 | 0.329  | 1.00 | 50.00 | . |
| ATOM | 1048 | O   | O   | . GLY | GLY | . . | 141 | 141 | . -4.196 | 13.371 | 0.335  | 1.00 | 50.00 | . |
| ATOM | 1049 | N   | N   | . THR | THR | . . | 142 | 142 | . -3.670 | 15.538 | 0.676  | 1.00 | 50.00 | . |
| ATOM | 1050 | CA  | CA  | . THR | THR | . . | 142 | 142 | . -4.960 | 15.888 | 1.296  | 1.00 | 50.00 | . |
| ATOM | 1051 | C   | C   | . THR | THR | . . | 142 | 142 | . -5.963 | 16.523 | 0.333  | 1.00 | 50.00 | . |
| ATOM | 1052 | O   | O   | . THR | THR | . . | 142 | 142 | . -7.144 | 16.530 | 0.659  | 1.00 | 50.00 | . |
| ATOM | 1053 | CB  | CB  | . THR | THR | . . | 142 | 142 | . -4.793 | 16.790 | 2.522  | 1.00 | 50.00 | . |
| ATOM | 1054 | OG1 | OG1 | . THR | THR | . . | 142 | 142 | . -4.152 | 18.009 | 2.130  | 1.00 | 50.00 | . |
| ATOM | 1055 | CG2 | CG2 | . THR | THR | . . | 142 | 142 | . -4.009 | 16.080 | 3.633  | 1.00 | 50.00 | . |
| ATOM | 1056 | N   | N   | . SER | SER | . . | 143 | 143 | . -5.462 | 17.187 | -0.719 | 1.00 | 50.00 | . |

|      |      |     |     |   |     |     |   |   |     |     |   |        |        |        |      |       |   |
|------|------|-----|-----|---|-----|-----|---|---|-----|-----|---|--------|--------|--------|------|-------|---|
| ATOM | 1057 | CA  | CA  | . | SER | SER | . | . | 143 | 143 | . | -6.257 | 17.894 | -1.757 | 1.00 | 50.00 | . |
| ATOM | 1058 | C   | C   | . | SER | SER | . | . | 143 | 143 | . | -6.597 | 19.340 | -1.362 | 1.00 | 50.00 | . |
| ATOM | 1059 | O   | O   | . | SER | SER | . | . | 143 | 143 | . | -7.178 | 20.123 | -2.108 | 1.00 | 50.00 | . |
| ATOM | 1060 | CB  | CB  | . | SER | SER | . | . | 143 | 143 | . | -7.512 | 17.086 | -2.127 | 1.00 | 50.00 | . |
| ATOM | 1061 | OG  | OG  | . | SER | SER | . | . | 143 | 143 | . | -8.428 | 17.790 | -2.955 | 1.00 | 50.00 | . |
| ATOM | 1062 | N   | N   | . | VAL | VAL | . | . | 144 | 144 | . | -6.131 | 19.716 | -0.184 | 1.00 | 50.00 | . |
| ATOM | 1063 | CA  | CA  | . | VAL | VAL | . | . | 144 | 144 | . | -6.342 | 21.053 | 0.357  | 1.00 | 50.00 | . |
| ATOM | 1064 | C   | C   | . | VAL | VAL | . | . | 144 | 144 | . | -5.580 | 22.098 | -0.468 | 1.00 | 50.00 | . |
| ATOM | 1065 | O   | O   | . | VAL | VAL | . | . | 144 | 144 | . | -4.429 | 21.887 | -0.844 | 1.00 | 50.00 | . |
| ATOM | 1066 | CB  | CB  | . | VAL | VAL | . | . | 144 | 144 | . | -5.898 | 20.942 | 1.810  | 1.00 | 50.00 | . |
| ATOM | 1067 | CG1 | CG1 | . | VAL | VAL | . | . | 144 | 144 | . | -4.425 | 21.261 | 2.095  | 1.00 | 50.00 | . |
| ATOM | 1068 | CG2 | CG2 | . | VAL | VAL | . | . | 144 | 144 | . | -6.875 | 21.752 | 2.624  | 1.00 | 50.00 | . |
| ATOM | 1069 | N   | N   | . | PHE | PHE | . | . | 145 | 145 | . | -6.160 | 23.278 | -0.538 | 1.00 | 50.00 | . |
| ATOM | 1070 | CA  | CA  | . | PHE | PHE | . | . | 145 | 145 | . | -5.501 | 24.387 | -1.231 | 1.00 | 50.00 | . |
| ATOM | 1071 | C   | C   | . | PHE | PHE | . | . | 145 | 145 | . | -4.773 | 25.288 | -0.235 | 1.00 | 50.00 | . |
| ATOM | 1072 | O   | O   | . | PHE | PHE | . | . | 145 | 145 | . | -5.290 | 25.566 | 0.851  | 1.00 | 50.00 | . |
| ATOM | 1073 | CB  | CB  | . | PHE | PHE | . | . | 145 | 145 | . | -6.566 | 25.199 | -1.937 | 1.00 | 50.00 | . |
| ATOM | 1074 | CG  | CG  | . | PHE | PHE | . | . | 145 | 145 | . | -7.255 | 24.436 | -3.069 | 1.00 | 50.00 | . |
| ATOM | 1075 | CD1 | CD1 | . | PHE | PHE | . | . | 145 | 145 | . | -6.683 | 24.386 | -4.333 | 1.00 | 50.00 | . |
| ATOM | 1076 | CD2 | CD2 | . | PHE | PHE | . | . | 145 | 145 | . | -8.478 | 23.821 | -2.830 | 1.00 | 50.00 | . |
| ATOM | 1077 | CE1 | CE1 | . | PHE | PHE | . | . | 145 | 145 | . | -7.348 | 23.695 | -5.334 | 1.00 | 50.00 | . |
| ATOM | 1078 | CE2 | CE2 | . | PHE | PHE | . | . | 145 | 145 | . | -9.128 | 23.130 | -3.843 | 1.00 | 50.00 | . |
| ATOM | 1079 | CZ  | CZ  | . | PHE | PHE | . | . | 145 | 145 | . | -8.556 | 23.060 | -5.103 | 1.00 | 50.00 | . |
| ATOM | 1080 | N   | N   | . | LEU | LEU | . | . | 146 | 146 | . | -3.567 | 25.676 | -0.636 | 1.00 | 50.00 | . |
| ATOM | 1081 | CA  | CA  | . | LEU | LEU | . | . | 146 | 146 | . | -2.770 | 26.677 | 0.089  | 1.00 | 50.00 | . |
| ATOM | 1082 | C   | C   | . | LEU | LEU | . | . | 146 | 146 | . | -3.512 | 28.018 | 0.024  | 1.00 | 50.00 | . |
| ATOM | 1083 | O   | O   | . | LEU | LEU | . | . | 146 | 146 | . | -3.714 | 28.572 | -1.055 | 1.00 | 50.00 | . |
| ATOM | 1084 | CB  | CB  | . | LEU | LEU | . | . | 146 | 146 | . | -1.390 | 26.812 | -0.565 | 1.00 | 50.00 | . |
| ATOM | 1085 | CG  | CG  | . | LEU | LEU | . | . | 146 | 146 | . | -0.462 | 27.740 | 0.225  | 1.00 | 50.00 | . |
| ATOM | 1086 | CD1 | CD1 | . | LEU | LEU | . | . | 146 | 146 | . | -0.088 | 27.103 | 1.563  | 1.00 | 50.00 | . |
| ATOM | 1087 | CD2 | CD2 | . | LEU | LEU | . | . | 146 | 146 | . | 0.795  | 28.056 | -0.585 | 1.00 | 50.00 | . |
| ATOM | 1088 | N   | N   | . | SER | SER | . | . | 147 | 147 | . | -3.908 | 28.499 | 1.194  | 1.00 | 50.00 | . |
| ATOM | 1089 | CA  | CA  | . | SER | SER | . | . | 147 | 147 | . | -4.769 | 29.693 | 1.283  | 1.00 | 50.00 | . |
| ATOM | 1090 | C   | C   | . | SER | SER | . | . | 147 | 147 | . | -4.487 | 30.456 | 2.573  | 1.00 | 50.00 | . |
| ATOM | 1091 | O   | O   | . | SER | SER | . | . | 147 | 147 | . | -4.046 | 29.875 | 3.565  | 1.00 | 50.00 | . |
| ATOM | 1092 | CB  | CB  | . | SER | SER | . | . | 147 | 147 | . | -6.249 | 29.287 | 1.282  | 1.00 | 50.00 | . |
| ATOM | 1093 | OG  | OG  | . | SER | SER | . | . | 147 | 147 | . | -6.575 | 28.541 | 0.104  | 1.00 | 50.00 | . |
| ATOM | 1094 | N   | N   | . | VAL | VAL | . | . | 148 | 148 | . | -4.606 | 31.773 | 2.493  | 1.00 | 50.00 | . |
| ATOM | 1095 | CA  | CA  | . | VAL | VAL | . | . | 148 | 148 | . | -4.622 | 32.597 | 3.718  | 1.00 | 50.00 | . |
| ATOM | 1096 | C   | C   | . | VAL | VAL | . | . | 148 | 148 | . | -6.026 | 32.485 | 4.330  | 1.00 | 50.00 | . |
| ATOM | 1097 | O   | O   | . | VAL | VAL | . | . | 148 | 148 | . | -7.004 | 32.246 | 3.636  | 1.00 | 50.00 | . |
| ATOM | 1098 | CB  | CB  | . | VAL | VAL | . | . | 148 | 148 | . | -4.090 | 34.030 | 3.474  | 1.00 | 50.00 | . |
| ATOM | 1099 | CG1 | CG1 | . | VAL | VAL | . | . | 148 | 148 | . | -4.771 | 34.776 | 2.340  | 1.00 | 50.00 | . |
| ATOM | 1100 | CG2 | CG2 | . | VAL | VAL | . | . | 148 | 148 | . | -4.166 | 34.909 | 4.722  | 1.00 | 50.00 | . |
| ATOM | 1101 | N   | N   | . | THR | THR | . | . | 149 | 149 | . | -6.062 | 32.305 | 5.637  | 1.00 | 50.00 | . |
| ATOM | 1102 | CA  | CA  | . | THR | THR | . | . | 149 | 149 | . | -7.358 | 32.143 | 6.340  | 1.00 | 50.00 | . |
| ATOM | 1103 | C   | C   | . | THR | THR | . | . | 149 | 149 | . | -8.203 | 33.422 | 6.280  | 1.00 | 50.00 | . |
| ATOM | 1104 | O   | O   | . | THR | THR | . | . | 149 | 149 | . | -9.421 | 33.392 | 6.434  | 1.00 | 50.00 | . |
| ATOM | 1105 | CB  | CB  | . | THR | THR | . | . | 149 | 149 | . | -7.159 | 31.793 | 7.811  | 1.00 | 50.00 | . |
| ATOM | 1106 | OG1 | OG1 | . | THR | THR | . | . | 149 | 149 | . | -6.453 | 32.856 | 8.437  | 1.00 | 50.00 | . |
| ATOM | 1107 | CG2 | CG2 | . | THR | THR | . | . | 149 | 149 | . | -6.331 | 30.536 | 7.995  | 1.00 | 50.00 | . |
| ATOM | 1108 | N   | N   | . | GLY | GLY | . | . | 150 | 150 | . | -7.446 | 34.523 | 6.331  | 1.00 | 50.00 | . |
| ATOM | 1109 | CA  | CA  | . | GLY | GLY | . | . | 150 | 150 | . | -7.994 | 35.873 | 6.535  | 1.00 | 50.00 | . |
| ATOM | 1110 | C   | C   | . | GLY | GLY | . | . | 150 | 150 | . | -7.703 | 36.399 | 7.938  | 1.00 | 50.00 | . |
| ATOM | 1111 | O   | O   | . | GLY | GLY | . | . | 150 | 150 | . | -7.921 | 37.570 | 8.229  | 1.00 | 50.00 | . |
| ATOM | 1112 | N   | N   | . | GLU | GLU | . | . | 151 | 151 | . | -7.201 | 35.505 | 8.777  | 1.00 | 50.00 | . |
| ATOM | 1113 | CA  | CA  | . | GLU | GLU | . | . | 151 | 151 | . | -6.802 | 35.826 | 10.144 | 1.00 | 50.00 | . |

|      |      |     |     |   |     |     |   |   |     |     |   |        |        |        |      |       |   |
|------|------|-----|-----|---|-----|-----|---|---|-----|-----|---|--------|--------|--------|------|-------|---|
| ATOM | 1114 | C   | C   | . | GLU | GLU | . | . | 151 | 151 | . | -5.319 | 36.199 | 10.185 | 1.00 | 50.00 | . |
| ATOM | 1115 | O   | O   | . | GLU | GLU | . | . | 151 | 151 | . | -4.512 | 35.789 | 9.346  | 1.00 | 50.00 | . |
| ATOM | 1116 | CB  | CB  | . | GLU | GLU | . | . | 151 | 151 | . | -7.106 | 34.600 | 10.992 | 1.00 | 50.00 | . |
| ATOM | 1117 | CG  | CG  | . | GLU | GLU | . | . | 151 | 151 | . | -6.789 | 34.817 | 12.471 | 1.00 | 50.00 | . |
| ATOM | 1118 | CD  | CD  | . | GLU | GLU | . | . | 151 | 151 | . | -7.335 | 33.688 | 13.330 | 1.00 | 50.00 | . |
| ATOM | 1119 | OE1 | OE1 | . | GLU | GLU | . | . | 151 | 151 | . | -7.602 | 32.602 | 12.766 | 1.00 | 50.00 | . |
| ATOM | 1120 | OE2 | OE2 | . | GLU | GLU | . | . | 151 | 151 | . | -7.418 | 33.930 | 14.552 | 1.00 | 50.00 | . |
| ATOM | 1121 | N   | N   | . | GLN | GLN | . | . | 152 | 152 | . | -5.030 | 37.030 | 11.172 | 1.00 | 50.00 | . |
| ATOM | 1122 | CA  | CA  | . | GLN | GLN | . | . | 152 | 152 | . | -3.670 | 37.506 | 11.455 | 1.00 | 50.00 | . |
| ATOM | 1123 | C   | C   | . | GLN | GLN | . | . | 152 | 152 | . | -3.259 | 37.078 | 12.864 | 1.00 | 50.00 | . |
| ATOM | 1124 | O   | O   | . | GLN | GLN | . | . | 152 | 152 | . | -4.095 | 36.903 | 13.750 | 1.00 | 50.00 | . |
| ATOM | 1125 | CB  | CB  | . | GLN | GLN | . | . | 152 | 152 | . | -3.621 | 39.030 | 11.376 | 1.00 | 50.00 | . |
| ATOM | 1126 | CG  | CG  | . | GLN | GLN | . | . | 152 | 152 | . | -3.960 | 39.540 | 9.976  | 1.00 | 50.00 | . |
| ATOM | 1127 | CD  | CD  | . | GLN | GLN | . | . | 152 | 152 | . | -3.802 | 41.056 | 9.868  | 1.00 | 50.00 | . |
| ATOM | 1128 | OE1 | OE1 | . | GLN | GLN | . | . | 152 | 152 | . | -2.963 | 41.686 | 10.494 | 1.00 | 50.00 | . |
| ATOM | 1129 | NE2 | NE2 | . | GLN | GLN | . | . | 152 | 152 | . | -4.627 | 41.664 | 9.045  | 1.00 | 50.00 | . |
| ATOM | 1130 | N   | N   | . | TYR | TYR | . | . | 153 | 153 | . | -1.959 | 36.891 | 13.014 | 1.00 | 50.00 | . |
| ATOM | 1131 | CA  | CA  | . | TYR | TYR | . | . | 153 | 153 | . | -1.351 | 36.536 | 14.304 | 1.00 | 50.00 | . |
| ATOM | 1132 | C   | C   | . | TYR | TYR | . | . | 153 | 153 | . | -1.012 | 37.793 | 15.110 | 1.00 | 50.00 | . |
| ATOM | 1133 | O   | O   | . | TYR | TYR | . | . | 153 | 153 | . | -0.914 | 38.900 | 14.572 | 1.00 | 50.00 | . |
| ATOM | 1134 | CB  | CB  | . | TYR | TYR | . | . | 153 | 153 | . | -0.081 | 35.715 | 14.075 | 1.00 | 50.00 | . |
| ATOM | 1135 | CG  | CG  | . | TYR | TYR | . | . | 153 | 153 | . | -0.377 | 34.364 | 13.424 | 1.00 | 50.00 | . |
| ATOM | 1136 | CD1 | CD1 | . | TYR | TYR | . | . | 153 | 153 | . | -0.723 | 33.268 | 14.204 | 1.00 | 50.00 | . |
| ATOM | 1137 | CD2 | CD2 | . | TYR | TYR | . | . | 153 | 153 | . | -0.243 | 34.221 | 12.051 | 1.00 | 50.00 | . |
| ATOM | 1138 | CE1 | CE1 | . | TYR | TYR | . | . | 153 | 153 | . | -0.935 | 32.034 | 13.607 | 1.00 | 50.00 | . |
| ATOM | 1139 | CE2 | CE2 | . | TYR | TYR | . | . | 153 | 153 | . | -0.454 | 32.993 | 11.455 | 1.00 | 50.00 | . |
| ATOM | 1140 | CZ  | CZ  | . | TYR | TYR | . | . | 153 | 153 | . | -0.803 | 31.902 | 12.233 | 1.00 | 50.00 | . |
| ATOM | 1141 | OH  | OH  | . | TYR | TYR | . | . | 153 | 153 | . | -1.029 | 30.707 | 11.642 | 1.00 | 50.00 | . |
| ATOM | 1142 | N   | N   | . | GLY | GLY | . | . | 154 | 154 | . | -0.913 | 37.575 | 16.424 | 1.00 | 50.00 | . |
| ATOM | 1143 | CA  | CA  | . | GLY | GLY | . | . | 154 | 154 | . | -0.404 | 38.609 | 17.343 | 1.00 | 50.00 | . |
| ATOM | 1144 | C   | C   | . | GLY | GLY | . | . | 154 | 154 | . | 1.099  | 38.374 | 17.538 | 1.00 | 50.00 | . |
| ATOM | 1145 | O   | O   | . | GLY | GLY | . | . | 154 | 154 | . | 1.738  | 37.627 | 16.792 | 1.00 | 50.00 | . |
| ATOM | 1146 | N   | N   | . | SER | SER | . | . | 155 | 155 | . | 1.632  | 38.930 | 18.619 | 1.00 | 50.00 | . |
| ATOM | 1147 | CA  | CA  | . | SER | SER | . | . | 155 | 155 | . | 3.034  | 38.670 | 19.007 | 1.00 | 50.00 | . |
| ATOM | 1148 | C   | C   | . | SER | SER | . | . | 155 | 155 | . | 3.263  | 37.155 | 19.221 | 1.00 | 50.00 | . |
| ATOM | 1149 | O   | O   | . | SER | SER | . | . | 155 | 155 | . | 2.302  | 36.424 | 19.472 | 1.00 | 50.00 | . |
| ATOM | 1150 | CB  | CB  | . | SER | SER | . | . | 155 | 155 | . | 3.395  | 39.449 | 20.276 | 1.00 | 50.00 | . |
| ATOM | 1151 | OG  | OG  | . | SER | SER | . | . | 155 | 155 | . | 2.562  | 39.023 | 21.353 | 1.00 | 50.00 | . |
| ATOM | 1152 | N   | N   | . | PRO | PRO | . | . | 156 | 156 | . | 4.496  | 36.681 | 18.989 | 1.00 | 50.00 | . |
| ATOM | 1153 | CA  | CA  | . | PRO | PRO | . | . | 156 | 156 | . | 5.679  | 37.480 | 18.598 | 1.00 | 50.00 | . |
| ATOM | 1154 | C   | C   | . | PRO | PRO | . | . | 156 | 156 | . | 5.804  | 37.729 | 17.083 | 1.00 | 50.00 | . |
| ATOM | 1155 | O   | O   | . | PRO | PRO | . | . | 156 | 156 | . | 6.854  | 38.151 | 16.605 | 1.00 | 50.00 | . |
| ATOM | 1156 | CB  | CB  | . | PRO | PRO | . | . | 156 | 156 | . | 6.838  | 36.640 | 19.131 | 1.00 | 50.00 | . |
| ATOM | 1157 | CG  | CG  | . | PRO | PRO | . | . | 156 | 156 | . | 6.362  | 35.211 | 18.866 | 1.00 | 50.00 | . |
| ATOM | 1158 | CD  | CD  | . | PRO | PRO | . | . | 156 | 156 | . | 4.869  | 35.269 | 19.197 | 1.00 | 50.00 | . |
| ATOM | 1159 | N   | N   | . | ILE | ILE | . | . | 157 | 157 | . | 4.717  | 37.488 | 16.353 | 1.00 | 50.00 | . |
| ATOM | 1160 | CA  | CA  | . | ILE | ILE | . | . | 157 | 157 | . | 4.642  | 37.656 | 14.886 | 1.00 | 50.00 | . |
| ATOM | 1161 | C   | C   | . | ILE | ILE | . | . | 157 | 157 | . | 3.441  | 38.514 | 14.475 | 1.00 | 50.00 | . |
| ATOM | 1162 | O   | O   | . | ILE | ILE | . | . | 157 | 157 | . | 2.679  | 38.188 | 13.563 | 1.00 | 50.00 | . |
| ATOM | 1163 | CB  | CB  | . | ILE | ILE | . | . | 157 | 157 | . | 4.592  | 36.298 | 14.173 | 1.00 | 50.00 | . |
| ATOM | 1164 | CG1 | CG1 | . | ILE | ILE | . | . | 157 | 157 | . | 3.513  | 35.351 | 14.730 | 1.00 | 50.00 | . |
| ATOM | 1165 | CG2 | CG2 | . | ILE | ILE | . | . | 157 | 157 | . | 5.995  | 35.717 | 14.207 | 1.00 | 50.00 | . |
| ATOM | 1166 | CD1 | CD1 | . | ILE | ILE | . | . | 157 | 157 | . | 3.357  | 34.039 | 13.952 | 1.00 | 50.00 | . |
| ATOM | 1167 | N   | N   | . | ARG | ARG | . | . | 158 | 158 | . | 3.294  | 39.619 | 15.194 | 1.00 | 50.00 | . |
| ATOM | 1168 | CA  | CA  | . | ARG | ARG | . | . | 158 | 158 | . | 2.132  | 40.507 | 15.031 | 1.00 | 50.00 | . |
| ATOM | 1169 | C   | C   | . | ARG | ARG | . | . | 158 | 158 | . | 1.984  | 40.973 | 13.577 | 1.00 | 50.00 | . |
| ATOM | 1170 | O   | O   | . | ARG | ARG | . | . | 158 | 158 | . | 2.956  | 41.388 | 12.947 | 1.00 | 50.00 | . |



|      |      |     |     |   |     |     |   |   |     |     |   |        |        |        |      |       |   |
|------|------|-----|-----|---|-----|-----|---|---|-----|-----|---|--------|--------|--------|------|-------|---|
| ATOM | 1171 | CB  | CB  | . | ARG | ARG | . | . | 158 | 158 | . | 2.309  | 41.712 | 15.951 | 1.00 | 50.00 | . |
| ATOM | 1172 | CG  | CG  | . | ARG | ARG | . | . | 158 | 158 | . | 1.142  | 42.696 | 15.823 | 1.00 | 50.00 | . |
| ATOM | 1173 | CD  | CD  | . | ARG | ARG | . | . | 158 | 158 | . | 1.387  | 43.937 | 16.676 | 1.00 | 50.00 | . |
| ATOM | 1174 | NE  | NE  | . | ARG | ARG | . | . | 158 | 158 | . | 1.368  | 43.552 | 18.098 | 1.00 | 50.00 | . |
| ATOM | 1175 | CZ  | CZ  | . | ARG | ARG | . | . | 158 | 158 | . | 0.278  | 43.373 | 18.849 | 1.00 | 50.00 | . |
| ATOM | 1176 | NH1 | NH1 | . | ARG | ARG | . | . | 158 | 158 | . | -0.940 | 43.547 | 18.349 | 1.00 | 50.00 | . |
| ATOM | 1177 | NH2 | NH2 | . | ARG | ARG | . | . | 158 | 158 | . | 0.403  | 43.015 | 20.117 | 1.00 | 50.00 | . |
| ATOM | 1178 | N   | N   | . | GLY | GLY | . | . | 159 | 159 | . | 0.739  | 40.864 | 13.105 | 1.00 | 50.00 | . |
| ATOM | 1179 | CA  | CA  | . | GLY | GLY | . | . | 159 | 159 | . | 0.368  | 41.350 | 11.763 | 1.00 | 50.00 | . |
| ATOM | 1180 | C   | C   | . | GLY | GLY | . | . | 159 | 159 | . | 0.508  | 40.298 | 10.653 | 1.00 | 50.00 | . |
| ATOM | 1181 | O   | O   | . | GLY | GLY | . | . | 159 | 159 | . | -0.024 | 40.480 | 9.560  | 1.00 | 50.00 | . |
| ATOM | 1182 | N   | N   | . | GLN | GLN | . | . | 160 | 160 | . | 1.249  | 39.225 | 10.923 | 1.00 | 50.00 | . |
| ATOM | 1183 | CA  | CA  | . | GLN | GLN | . | . | 160 | 160 | . | 1.472  | 38.170 | 9.917  | 1.00 | 50.00 | . |
| ATOM | 1184 | C   | C   | . | GLN | GLN | . | . | 160 | 160 | . | 0.187  | 37.366 | 9.706  | 1.00 | 50.00 | . |
| ATOM | 1185 | O   | O   | . | GLN | GLN | . | . | 160 | 160 | . | -0.543 | 37.075 | 10.652 | 1.00 | 50.00 | . |
| ATOM | 1186 | CB  | CB  | . | GLN | GLN | . | . | 160 | 160 | . | 2.621  | 37.257 | 10.340 | 1.00 | 50.00 | . |
| ATOM | 1187 | CG  | CG  | . | GLN | GLN | . | . | 160 | 160 | . | 3.930  | 38.048 | 10.417 | 1.00 | 50.00 | . |
| ATOM | 1188 | CD  | CD  | . | GLN | GLN | . | . | 160 | 160 | . | 5.132  | 37.146 | 10.692 | 1.00 | 50.00 | . |
| ATOM | 1189 | OE1 | OE1 | . | GLN | GLN | . | . | 160 | 160 | . | 5.201  | 35.998 | 10.274 | 1.00 | 50.00 | . |
| ATOM | 1190 | NE2 | NE2 | . | GLN | GLN | . | . | 160 | 160 | . | 6.112  | 37.689 | 11.378 | 1.00 | 50.00 | . |
| ATOM | 1191 | N   | N   | . | HIS | HIS | . | . | 161 | 161 | . | -0.096 | 37.070 | 8.447  | 1.00 | 50.00 | . |
| ATOM | 1192 | CA  | CA  | . | HIS | HIS | . | . | 161 | 161 | . | -1.323 | 36.350 | 8.070  | 1.00 | 50.00 | . |
| ATOM | 1193 | C   | C   | . | HIS | HIS | . | . | 161 | 161 | . | -1.176 | 34.841 | 8.248  | 1.00 | 50.00 | . |
| ATOM | 1194 | O   | O   | . | HIS | HIS | . | . | 161 | 161 | . | -0.136 | 34.253 | 7.950  | 1.00 | 50.00 | . |
| ATOM | 1195 | CB  | CB  | . | HIS | HIS | . | . | 161 | 161 | . | -1.699 | 36.663 | 6.624  | 1.00 | 50.00 | . |
| ATOM | 1196 | CG  | CG  | . | HIS | HIS | . | . | 161 | 161 | . | -2.151 | 38.114 | 6.475  | 1.00 | 50.00 | . |
| ATOM | 1197 | ND1 | ND1 | . | HIS | HIS | . | . | 161 | 161 | . | -3.295 | 38.625 | 6.915  | 1.00 | 50.00 | . |
| ATOM | 1198 | CD2 | CD2 | . | HIS | HIS | . | . | 161 | 161 | . | -1.521 | 39.060 | 5.791  | 1.00 | 50.00 | . |
| ATOM | 1199 | CE1 | CE1 | . | HIS | HIS | . | . | 161 | 161 | . | -3.368 | 39.883 | 6.489  | 1.00 | 50.00 | . |
| ATOM | 1200 | NE2 | NE2 | . | HIS | HIS | . | . | 161 | 161 | . | -2.274 | 40.153 | 5.787  | 1.00 | 50.00 | . |
| ATOM | 1201 | N   | N   | . | GLU | GLU | . | . | 162 | 162 | . | -2.251 | 34.242 | 8.739  | 1.00 | 50.00 | . |
| ATOM | 1202 | CA  | CA  | . | GLU | GLU | . | . | 162 | 162 | . | -2.336 | 32.782 | 8.852  | 1.00 | 50.00 | . |
| ATOM | 1203 | C   | C   | . | GLU | GLU | . | . | 162 | 162 | . | -2.446 | 32.139 | 7.469  | 1.00 | 50.00 | . |
| ATOM | 1204 | O   | O   | . | GLU | GLU | . | . | 162 | 162 | . | -3.331 | 32.488 | 6.687  | 1.00 | 50.00 | . |
| ATOM | 1205 | CB  | CB  | . | GLU | GLU | . | . | 162 | 162 | . | -3.525 | 32.429 | 9.733  | 1.00 | 50.00 | . |
| ATOM | 1206 | CG  | CG  | . | GLU | GLU | . | . | 162 | 162 | . | -3.620 | 30.922 | 9.971  | 1.00 | 50.00 | . |
| ATOM | 1207 | CD  | CD  | . | GLU | GLU | . | . | 162 | 162 | . | -4.862 | 30.583 | 10.786 | 1.00 | 50.00 | . |
| ATOM | 1208 | OE1 | OE1 | . | GLU | GLU | . | . | 162 | 162 | . | -5.828 | 31.368 | 10.778 | 1.00 | 50.00 | . |
| ATOM | 1209 | OE2 | OE2 | . | GLU | GLU | . | . | 162 | 162 | . | -4.817 | 29.534 | 11.450 | 1.00 | 50.00 | . |
| ATOM | 1210 | N   | N   | . | VAL | VAL | . | . | 163 | 163 | . | -1.641 | 31.099 | 7.303  | 1.00 | 50.00 | . |
| ATOM | 1211 | CA  | CA  | . | VAL | VAL | . | . | 163 | 163 | . | -1.651 | 30.273 | 6.086  | 1.00 | 50.00 | . |
| ATOM | 1212 | C   | C   | . | VAL | VAL | . | . | 163 | 163 | . | -2.159 | 28.887 | 6.495  | 1.00 | 50.00 | . |
| ATOM | 1213 | O   | O   | . | VAL | VAL | . | . | 163 | 163 | . | -1.678 | 28.281 | 7.451  | 1.00 | 50.00 | . |
| ATOM | 1214 | CB  | CB  | . | VAL | VAL | . | . | 163 | 163 | . | -0.234 | 30.187 | 5.496  | 1.00 | 50.00 | . |
| ATOM | 1215 | CG1 | CG1 | . | VAL | VAL | . | . | 163 | 163 | . | -0.201 | 29.299 | 4.254  | 1.00 | 50.00 | . |
| ATOM | 1216 | CG2 | CG2 | . | VAL | VAL | . | . | 163 | 163 | . | 0.279  | 31.567 | 5.081  | 1.00 | 50.00 | . |
| ATOM | 1217 | N   | N   | . | HIS | HIS | . | . | 164 | 164 | . | -3.175 | 28.447 | 5.776  | 1.00 | 50.00 | . |
| ATOM | 1218 | CA  | CA  | . | HIS | HIS | . | . | 164 | 164 | . | -3.798 | 27.147 | 6.045  | 1.00 | 50.00 | . |
| ATOM | 1219 | C   | C   | . | HIS | HIS | . | . | 164 | 164 | . | -4.044 | 26.378 | 4.739  | 1.00 | 50.00 | . |
| ATOM | 1220 | O   | O   | . | HIS | HIS | . | . | 164 | 164 | . | -3.843 | 26.879 | 3.632  | 1.00 | 50.00 | . |
| ATOM | 1221 | CB  | CB  | . | HIS | HIS | . | . | 164 | 164 | . | -5.122 | 27.401 | 6.768  | 1.00 | 50.00 | . |
| ATOM | 1222 | CG  | CG  | . | HIS | HIS | . | . | 164 | 164 | . | -6.158 | 27.948 | 5.776  | 1.00 | 50.00 | . |
| ATOM | 1223 | ND1 | ND1 | . | HIS | HIS | . | . | 164 | 164 | . | -7.204 | 27.312 | 5.296  | 1.00 | 50.00 | . |
| ATOM | 1224 | CD2 | CD2 | . | HIS | HIS | . | . | 164 | 164 | . | -6.212 | 29.170 | 5.283  | 1.00 | 50.00 | . |
| ATOM | 1225 | CE1 | CE1 | . | HIS | HIS | . | . | 164 | 164 | . | -7.959 | 28.200 | 4.655  | 1.00 | 50.00 | . |
| ATOM | 1226 | NE2 | NE2 | . | HIS | HIS | . | . | 164 | 164 | . | -7.349 | 29.365 | 4.648  | 1.00 | 50.00 | . |
| ATOM | 1227 | N   | N   | . | GLY | GLY | . | . | 165 | 165 | . | -4.720 | 25.256 | 4.958  | 1.00 | 50.00 | . |

|      |      |     |     |   |     |     |   |   |     |     |   |         |        |        |      |       |   |
|------|------|-----|-----|---|-----|-----|---|---|-----|-----|---|---------|--------|--------|------|-------|---|
| ATOM | 1228 | CA  | CA  | . | GLY | GLY | . | . | 165 | 165 | . | -5.265  | 24.450 | 3.875  | 1.00 | 50.00 | . |
| ATOM | 1229 | C   | C   | . | GLY | GLY | . | . | 165 | 165 | . | -6.785  | 24.490 | 3.992  | 1.00 | 50.00 | . |
| ATOM | 1230 | O   | O   | . | GLY | GLY | . | . | 165 | 165 | . | -7.368  | 23.985 | 4.958  | 1.00 | 50.00 | . |
| ATOM | 1231 | N   | N   | . | MET | MET | . | . | 166 | 166 | . | -7.401  | 24.980 | 2.923  | 1.00 | 50.00 | . |
| ATOM | 1232 | CA  | CA  | . | MET | MET | . | . | 166 | 166 | . | -8.867  | 24.990 | 2.784  | 1.00 | 50.00 | . |
| ATOM | 1233 | C   | C   | . | MET | MET | . | . | 166 | 166 | . | -9.324  | 23.855 | 1.845  | 1.00 | 50.00 | . |
| ATOM | 1234 | O   | O   | . | MET | MET | . | . | 166 | 166 | . | -8.708  | 23.663 | 0.793  | 1.00 | 50.00 | . |
| ATOM | 1235 | CB  | CB  | . | MET | MET | . | . | 166 | 166 | . | -9.302  | 26.349 | 2.224  | 1.00 | 50.00 | . |
| ATOM | 1236 | CG  | CG  | . | MET | MET | . | . | 166 | 166 | . | -10.822 | 26.554 | 2.175  | 1.00 | 50.00 | . |
| ATOM | 1237 | SD  | SD  | . | MET | MET | . | . | 166 | 166 | . | -11.741 | 26.565 | 3.754  | 1.00 | 50.00 | . |
| ATOM | 1238 | CE  | CE  | . | MET | MET | . | . | 166 | 166 | . | -11.369 | 28.219 | 4.290  | 1.00 | 50.00 | . |
| ATOM | 1239 | N   | N   | . | PRO | PRO | . | . | 167 | 167 | . | -10.403 | 23.141 | 2.211  | 1.00 | 50.00 | . |
| ATOM | 1240 | CA  | CA  | . | PRO | PRO | . | . | 167 | 167 | . | -11.009 | 22.095 | 1.365  | 1.00 | 50.00 | . |
| ATOM | 1241 | C   | C   | . | PRO | PRO | . | . | 167 | 167 | . | -11.469 | 22.636 | 0.002  | 1.00 | 50.00 | . |
| ATOM | 1242 | O   | O   | . | PRO | PRO | . | . | 167 | 167 | . | -11.404 | 21.937 | -1.003 | 1.00 | 50.00 | . |
| ATOM | 1243 | CB  | CB  | . | PRO | PRO | . | . | 167 | 167 | . | -12.187 | 21.560 | 2.188  | 1.00 | 50.00 | . |
| ATOM | 1244 | CG  | CG  | . | PRO | PRO | . | . | 167 | 167 | . | -12.561 | 22.734 | 3.091  | 1.00 | 50.00 | . |
| ATOM | 1245 | CD  | CD  | . | PRO | PRO | . | . | 167 | 167 | . | -11.185 | 23.286 | 3.457  | 1.00 | 50.00 | . |
| ATOM | 1246 | N   | N   | . | SER | SER | . | . | 168 | 168 | . | -11.931 | 23.884 | -0.009 | 1.00 | 50.00 | . |
| ATOM | 1247 | CA  | CA  | . | SER | SER | . | . | 168 | 168 | . | -12.390 | 24.563 | -1.236 | 1.00 | 50.00 | . |
| ATOM | 1248 | C   | C   | . | SER | SER | . | . | 168 | 168 | . | -11.559 | 25.815 | -1.538 | 1.00 | 50.00 | . |
| ATOM | 1249 | O   | O   | . | SER | SER | . | . | 168 | 168 | . | -10.851 | 26.343 | -0.686 | 1.00 | 50.00 | . |
| ATOM | 1250 | CB  | CB  | . | SER | SER | . | . | 168 | 168 | . | -13.867 | 24.938 | -1.093 | 1.00 | 50.00 | . |
| ATOM | 1251 | OG  | OG  | . | SER | SER | . | . | 168 | 168 | . | -14.629 | 23.743 | -0.904 | 1.00 | 50.00 | . |
| ATOM | 1252 | N   | N   | . | ALA | ALA | . | . | 169 | 169 | . | -11.548 | 26.206 | -2.805 | 1.00 | 50.00 | . |
| ATOM | 1253 | CA  | CA  | . | ALA | ALA | . | . | 169 | 169 | . | -10.868 | 27.441 | -3.239 | 1.00 | 50.00 | . |
| ATOM | 1254 | C   | C   | . | ALA | ALA | . | . | 169 | 169 | . | -11.591 | 28.671 | -2.668 | 1.00 | 50.00 | . |
| ATOM | 1255 | O   | O   | . | ALA | ALA | . | . | 169 | 169 | . | -12.813 | 28.778 | -2.747 | 1.00 | 50.00 | . |
| ATOM | 1256 | CB  | CB  | . | ALA | ALA | . | . | 169 | 169 | . | -10.851 | 27.498 | -4.767 | 1.00 | 50.00 | . |
| ATOM | 1257 | N   | N   | . | ASN | ASN | . | . | 170 | 170 | . | -10.816 | 29.532 | -2.020 | 1.00 | 50.00 | . |
| ATOM | 1258 | CA  | CA  | . | ASN | ASN | . | . | 170 | 170 | . | -11.350 | 30.773 | -1.429 | 1.00 | 50.00 | . |
| ATOM | 1259 | C   | C   | . | ASN | ASN | . | . | 170 | 170 | . | -10.729 | 32.003 | -2.118 | 1.00 | 50.00 | . |
| ATOM | 1260 | O   | O   | . | ASN | ASN | . | . | 170 | 170 | . | -9.816  | 31.878 | -2.937 | 1.00 | 50.00 | . |
| ATOM | 1261 | CB  | CB  | . | ASN | ASN | . | . | 170 | 170 | . | -11.094 | 30.728 | 0.089  | 1.00 | 50.00 | . |
| ATOM | 1262 | CG  | CG  | . | ASN | ASN | . | . | 170 | 170 | . | -11.735 | 31.908 | 0.830  | 1.00 | 50.00 | . |
| ATOM | 1263 | OD1 | OD1 | . | ASN | ASN | . | . | 170 | 170 | . | -12.892 | 32.251 | 0.638  | 1.00 | 50.00 | . |
| ATOM | 1264 | ND2 | ND2 | . | ASN | ASN | . | . | 170 | 170 | . | -10.902 | 32.721 | 1.438  | 1.00 | 50.00 | . |
| ATOM | 1265 | N   | N   | . | THR | THR | . | . | 171 | 171 | . | -11.086 | 33.179 | -1.613 | 1.00 | 50.00 | . |
| ATOM | 1266 | CA  | CA  | . | THR | THR | . | . | 171 | 171 | . | -10.538 | 34.481 | -2.059 | 1.00 | 50.00 | . |
| ATOM | 1267 | C   | C   | . | THR | THR | . | . | 171 | 171 | . | -9.063  | 34.664 | -1.659 | 1.00 | 50.00 | . |
| ATOM | 1268 | O   | O   | . | THR | THR | . | . | 171 | 171 | . | -8.401  | 35.642 | -1.998 | 1.00 | 50.00 | . |
| ATOM | 1269 | CB  | CB  | . | THR | THR | . | . | 171 | 171 | . | -11.367 | 35.635 | -1.477 | 1.00 | 50.00 | . |
| ATOM | 1270 | OG1 | OG1 | . | THR | THR | . | . | 171 | 171 | . | -11.331 | 35.598 | -0.046 | 1.00 | 50.00 | . |
| ATOM | 1271 | CG2 | CG2 | . | THR | THR | . | . | 171 | 171 | . | -12.816 | 35.580 | -1.971 | 1.00 | 50.00 | . |
| ATOM | 1272 | N   | N   | . | HIS | HIS | . | . | 172 | 172 | . | -8.560  | 33.664 | -0.948 | 1.00 | 50.00 | . |
| ATOM | 1273 | CA  | CA  | . | HIS | HIS | . | . | 172 | 172 | . | -7.216  | 33.640 | -0.374 | 1.00 | 50.00 | . |
| ATOM | 1274 | C   | C   | . | HIS | HIS | . | . | 172 | 172 | . | -6.327  | 32.535 | -0.954 | 1.00 | 50.00 | . |
| ATOM | 1275 | O   | O   | . | HIS | HIS | . | . | 172 | 172 | . | -5.185  | 32.374 | -0.525 | 1.00 | 50.00 | . |
| ATOM | 1276 | CB  | CB  | . | HIS | HIS | . | . | 172 | 172 | . | -7.504  | 33.384 | 1.095  | 1.00 | 50.00 | . |
| ATOM | 1277 | CG  | CG  | . | HIS | HIS | . | . | 172 | 172 | . | -8.083  | 34.584 | 1.860  | 1.00 | 50.00 | . |
| ATOM | 1278 | ND1 | ND1 | . | HIS | HIS | . | . | 172 | 172 | . | -8.300  | 34.640 | 3.170  | 1.00 | 50.00 | . |
| ATOM | 1279 | CD2 | CD2 | . | HIS | HIS | . | . | 172 | 172 | . | -8.530  | 35.729 | 1.354  | 1.00 | 50.00 | . |
| ATOM | 1280 | CE1 | CE1 | . | HIS | HIS | . | . | 172 | 172 | . | -8.880  | 35.796 | 3.448  | 1.00 | 50.00 | . |
| ATOM | 1281 | NE2 | NE2 | . | HIS | HIS | . | . | 172 | 172 | . | -9.020  | 36.478 | 2.327  | 1.00 | 50.00 | . |
| ATOM | 1282 | N   | N   | . | ASN | ASN | . | . | 173 | 173 | . | -6.844  | 31.873 | -1.986 | 1.00 | 50.00 | . |
| ATOM | 1283 | CA  | CA  | . | ASN | ASN | . | . | 173 | 173 | . | -6.150  | 30.747 | -2.631 | 1.00 | 50.00 | . |
| ATOM | 1284 | C   | C   | . | ASN | ASN | . | . | 173 | 173 | . | -5.264  | 31.175 | -3.811 | 1.00 | 50.00 | . |

|      |      |     |     |   |     |     |   |   |     |     |   |        |        |         |      |       |   |
|------|------|-----|-----|---|-----|-----|---|---|-----|-----|---|--------|--------|---------|------|-------|---|
| ATOM | 1285 | O   | O   | . | ASN | ASN | . | . | 173 | 173 | . | -4.317 | 30.487 | -4.184  | 1.00 | 50.00 | . |
| ATOM | 1286 | CB  | CB  | . | ASN | ASN | . | . | 173 | 173 | . | -7.187 | 29.719 | -3.082  | 1.00 | 50.00 | . |
| ATOM | 1287 | CG  | CG  | . | ASN | ASN | . | . | 173 | 173 | . | -6.572 | 28.415 | -3.559  | 1.00 | 50.00 | . |
| ATOM | 1288 | OD1 | OD1 | . | ASN | ASN | . | . | 173 | 173 | . | -5.391 | 28.246 | -3.919  | 1.00 | 50.00 | . |
| ATOM | 1289 | ND2 | ND2 | . | ASN | ASN | . | . | 173 | 173 | . | -7.345 | 27.392 | -3.657  | 1.00 | 50.00 | . |
| ATOM | 1290 | N   | N   | . | THR | THR | . | . | 174 | 174 | . | -5.518 | 32.341 | -4.384  | 1.00 | 50.00 | . |
| ATOM | 1291 | CA  | CA  | . | THR | THR | . | . | 174 | 174 | . | -4.762 | 32.753 | -5.578  | 1.00 | 50.00 | . |
| ATOM | 1292 | C   | C   | . | THR | THR | . | . | 174 | 174 | . | -3.397 | 33.328 | -5.168  | 1.00 | 50.00 | . |
| ATOM | 1293 | O   | O   | . | THR | THR | . | . | 174 | 174 | . | -3.308 | 34.249 | -4.350  | 1.00 | 50.00 | . |
| ATOM | 1294 | CB  | CB  | . | THR | THR | . | . | 174 | 174 | . | -5.585 | 33.739 | -6.415  | 1.00 | 50.00 | . |
| ATOM | 1295 | OG1 | OG1 | . | THR | THR | . | . | 174 | 174 | . | -6.893 | 33.221 | -6.651  | 1.00 | 50.00 | . |
| ATOM | 1296 | CG2 | CG2 | . | THR | THR | . | . | 174 | 174 | . | -4.951 | 33.967 | -7.782  | 1.00 | 50.00 | . |
| ATOM | 1297 | N   | N   | . | TRP | TRP | . | . | 175 | 175 | . | -2.363 | 32.791 | -5.806  | 1.00 | 50.00 | . |
| ATOM | 1298 | CA  | CA  | . | TRP | TRP | . | . | 175 | 175 | . | -0.967 | 33.220 | -5.604  | 1.00 | 50.00 | . |
| ATOM | 1299 | C   | C   | . | TRP | TRP | . | . | 175 | 175 | . | -0.329 | 33.643 | -6.931  | 1.00 | 50.00 | . |
| ATOM | 1300 | O   | O   | . | TRP | TRP | . | . | 175 | 175 | . | -0.800 | 33.298 | -8.015  | 1.00 | 50.00 | . |
| ATOM | 1301 | CB  | CB  | . | TRP | TRP | . | . | 175 | 175 | . | -0.130 | 32.093 | -4.992  | 1.00 | 50.00 | . |
| ATOM | 1302 | CG  | CG  | . | TRP | TRP | . | . | 175 | 175 | . | -0.675 | 31.639 | -3.639  | 1.00 | 50.00 | . |
| ATOM | 1303 | CD1 | CD1 | . | TRP | TRP | . | . | 175 | 175 | . | -1.555 | 30.660 | -3.462  | 1.00 | 50.00 | . |
| ATOM | 1304 | CD2 | CD2 | . | TRP | TRP | . | . | 175 | 175 | . | -0.331 | 32.119 | -2.386  | 1.00 | 50.00 | . |
| ATOM | 1305 | NE1 | NE1 | . | TRP | TRP | . | . | 175 | 175 | . | -1.788 | 30.493 | -2.162  | 1.00 | 50.00 | . |
| ATOM | 1306 | CE2 | CE2 | . | TRP | TRP | . | . | 175 | 175 | . | -1.049 | 31.362 | -1.473  | 1.00 | 50.00 | . |
| ATOM | 1307 | CE3 | CE3 | . | TRP | TRP | . | . | 175 | 175 | . | 0.543  | 33.107 | -1.952  | 1.00 | 50.00 | . |
| ATOM | 1308 | CZ2 | CZ2 | . | TRP | TRP | . | . | 175 | 175 | . | -0.887 | 31.587 | -0.112  | 1.00 | 50.00 | . |
| ATOM | 1309 | CZ3 | CZ3 | . | TRP | TRP | . | . | 175 | 175 | . | 0.703  | 33.335 | -0.591  | 1.00 | 50.00 | . |
| ATOM | 1310 | CH2 | CH2 | . | TRP | TRP | . | . | 175 | 175 | . | -0.013 | 32.576 | 0.328   | 1.00 | 50.00 | . |
| ATOM | 1311 | N   | N   | . | LYS | LYS | . | . | 176 | 176 | . | 0.684  | 34.482 | -6.790  | 1.00 | 50.00 | . |
| ATOM | 1312 | CA  | CA  | . | LYS | LYS | . | . | 176 | 176 | . | 1.491  | 35.016 | -7.894  | 1.00 | 50.00 | . |
| ATOM | 1313 | C   | C   | . | LYS | LYS | . | . | 176 | 176 | . | 2.972  | 34.877 | -7.520  | 1.00 | 50.00 | . |
| ATOM | 1314 | O   | O   | . | LYS | LYS | . | . | 176 | 176 | . | 3.366  | 35.117 | -6.379  | 1.00 | 50.00 | . |
| ATOM | 1315 | CB  | CB  | . | LYS | LYS | . | . | 176 | 176 | . | 1.099  | 36.483 | -8.069  | 1.00 | 50.00 | . |
| ATOM | 1316 | CG  | CG  | . | LYS | LYS | . | . | 176 | 176 | . | 1.930  | 37.239 | -9.115  | 1.00 | 50.00 | . |
| ATOM | 1317 | CD  | CD  | . | LYS | LYS | . | . | 176 | 176 | . | 1.653  | 38.744 | -9.072  | 1.00 | 50.00 | . |
| ATOM | 1318 | CE  | CE  | . | LYS | LYS | . | . | 176 | 176 | . | 1.960  | 39.332 | -7.691  | 1.00 | 50.00 | . |
| ATOM | 1319 | NZ  | NZ  | . | LYS | LYS | . | . | 176 | 176 | . | 1.674  | 40.767 | -7.638  | 1.00 | 50.00 | . |
| ATOM | 1320 | N   | N   | . | ALA | ALA | . | . | 177 | 177 | . | 3.768  | 34.516 | -8.516  | 1.00 | 50.00 | . |
| ATOM | 1321 | CA  | CA  | . | ALA | ALA | . | . | 177 | 177 | . | 5.224  | 34.379 | -8.345  | 1.00 | 50.00 | . |
| ATOM | 1322 | C   | C   | . | ALA | ALA | . | . | 177 | 177 | . | 5.945  | 35.680 | -8.720  | 1.00 | 50.00 | . |
| ATOM | 1323 | O   | O   | . | ALA | ALA | . | . | 177 | 177 | . | 5.480  | 36.466 | -9.544  | 1.00 | 50.00 | . |
| ATOM | 1324 | CB  | CB  | . | ALA | ALA | . | . | 177 | 177 | . | 5.733  | 33.223 | -9.208  | 1.00 | 50.00 | . |
| ATOM | 1325 | N   | N   | . | MET | MET | . | . | 178 | 178 | . | 7.057  | 35.902 | -8.033  | 1.00 | 50.00 | . |
| ATOM | 1326 | CA  | CA  | . | MET | MET | . | . | 178 | 178 | . | 7.941  | 37.056 | -8.273  | 1.00 | 50.00 | . |
| ATOM | 1327 | C   | C   | . | MET | MET | . | . | 178 | 178 | . | 9.388  | 36.638 | -7.986  | 1.00 | 50.00 | . |
| ATOM | 1328 | O   | O   | . | MET | MET | . | . | 178 | 178 | . | 9.656  | 35.872 | -7.056  | 1.00 | 50.00 | . |
| ATOM | 1329 | CB  | CB  | . | MET | MET | . | . | 178 | 178 | . | 7.537  | 38.247 | -7.388  | 1.00 | 50.00 | . |
| ATOM | 1330 | CG  | CG  | . | MET | MET | . | . | 178 | 178 | . | 7.749  | 37.945 | -5.901  | 1.00 | 50.00 | . |
| ATOM | 1331 | SD  | SD  | . | MET | MET | . | . | 178 | 178 | . | 7.648  | 39.320 | -4.701  | 1.00 | 50.00 | . |
| ATOM | 1332 | CE  | CE  | . | MET | MET | . | . | 178 | 178 | . | 8.694  | 40.566 | -5.419  | 1.00 | 50.00 | . |
| ATOM | 1333 | N   | N   | . | GLU | GLU | . | . | 179 | 179 | . | 10.309 | 37.212 | -8.746  | 1.00 | 50.00 | . |
| ATOM | 1334 | CA  | CA  | . | GLU | GLU | . | . | 179 | 179 | . | 11.738 | 36.949 | -8.531  | 1.00 | 50.00 | . |
| ATOM | 1335 | C   | C   | . | GLU | GLU | . | . | 179 | 179 | . | 12.277 | 37.843 | -7.413  | 1.00 | 50.00 | . |
| ATOM | 1336 | O   | O   | . | GLU | GLU | . | . | 179 | 179 | . | 12.454 | 39.048 | -7.588  | 1.00 | 50.00 | . |
| ATOM | 1337 | CB  | CB  | . | GLU | GLU | . | . | 179 | 179 | . | 12.540 | 37.097 | -9.829  | 1.00 | 50.00 | . |
| ATOM | 1338 | CG  | CG  | . | GLU | GLU | . | . | 179 | 179 | . | 14.046 | 36.954 | -9.573  | 1.00 | 50.00 | . |
| ATOM | 1339 | CD  | CD  | . | GLU | GLU | . | . | 179 | 179 | . | 14.709 | 36.006 | -10.564 | 1.00 | 50.00 | . |
| ATOM | 1340 | OE1 | OE1 | . | GLU | GLU | . | . | 179 | 179 | . | 14.992 | 36.476 | -11.686 | 1.00 | 50.00 | . |
| ATOM | 1341 | OE2 | OE2 | . | GLU | GLU | . | . | 179 | 179 | . | 14.881 | 34.828 | -10.183 | 1.00 | 50.00 | . |

|      |      |     |     |   |     |     |   |   |     |     |   |        |        |         |      |       |   |
|------|------|-----|-----|---|-----|-----|---|---|-----|-----|---|--------|--------|---------|------|-------|---|
| ATOM | 1342 | N   | N   | . | GLY | GLY | . | . | 180 | 180 | . | 12.509 | 37.176 | -6.280  | 1.00 | 50.00 | . |
| ATOM | 1343 | CA  | CA  | . | GLY | GLY | . | . | 180 | 180 | . | 13.228 | 37.779 | -5.153  | 1.00 | 50.00 | . |
| ATOM | 1344 | C   | C   | . | GLY | GLY | . | . | 180 | 180 | . | 14.616 | 38.215 | -5.601  | 1.00 | 50.00 | . |
| ATOM | 1345 | O   | O   | . | GLY | GLY | . | . | 180 | 180 | . | 14.859 | 39.388 | -5.874  | 1.00 | 50.00 | . |
| ATOM | 1346 | N   | N   | . | ILE | ILE | . | . | 181 | 181 | . | 15.452 | 37.189 | -5.730  | 1.00 | 50.00 | . |
| ATOM | 1347 | CA  | CA  | . | ILE | ILE | . | . | 181 | 181 | . | 16.855 | 37.306 | -6.194  | 1.00 | 50.00 | . |
| ATOM | 1348 | C   | C   | . | ILE | ILE | . | . | 181 | 181 | . | 17.297 | 35.968 | -6.841  | 1.00 | 50.00 | . |
| ATOM | 1349 | O   | O   | . | ILE | ILE | . | . | 181 | 181 | . | 17.943 | 35.158 | -6.138  | 1.00 | 50.00 | . |
| ATOM | 1350 | CB  | CB  | . | ILE | ILE | . | . | 181 | 181 | . | 17.804 | 37.728 | -5.040  | 1.00 | 50.00 | . |
| ATOM | 1351 | CG1 | CG1 | . | ILE | ILE | . | . | 181 | 181 | . | 17.355 | 39.009 | -4.310  | 1.00 | 50.00 | . |
| ATOM | 1352 | CG2 | CG2 | . | ILE | ILE | . | . | 181 | 181 | . | 19.221 | 37.946 | -5.597  | 1.00 | 50.00 | . |
| ATOM | 1353 | CD1 | CD1 | . | ILE | ILE | . | . | 181 | 181 | . | 18.099 | 39.349 | -3.013  | 1.00 | 50.00 | . |
| ATOM | 1354 | OXT | OXT | . | ILE | ILE | . | . | 181 | 181 | . | 16.896 | 35.748 | -8.005  | 1.00 | 99.99 | . |
| ATOM | 1355 | N   | N   | . | GLY | GLY | A | A | -1  | -1  | . | 4.352  | 39.773 | -22.016 | 1.00 | 70.16 | . |
| ATOM | 1356 | CA  | CA  | . | GLY | GLY | A | A | -1  | -1  | . | 4.332  | 38.478 | -21.278 | 1.00 | 69.23 | . |
| ATOM | 1357 | C   | C   | . | GLY | GLY | A | A | -1  | -1  | . | 4.803  | 37.322 | -22.139 | 1.00 | 71.79 | . |
| ATOM | 1358 | O   | O   | . | GLY | GLY | A | A | -1  | -1  | . | 4.031  | 36.415 | -22.462 | 1.00 | 73.68 | . |
| ATOM | 1359 | N   | N   | . | SER | SER | A | A | 0   | 0   | . | 6.076  | 37.355 | -22.519 | 1.00 | 68.23 | . |
| ATOM | 1360 | CA  | CA  | . | SER | SER | A | A | 0   | 0   | . | 6.649  | 36.302 | -23.346 | 1.00 | 64.14 | . |
| ATOM | 1361 | C   | C   | . | SER | SER | A | A | 0   | 0   | . | 6.138  | 34.932 | -22.906 | 1.00 | 67.09 | . |
| ATOM | 1362 | O   | O   | . | SER | SER | A | A | 0   | 0   | . | 6.129  | 34.610 | -21.715 | 1.00 | 67.64 | . |
| ATOM | 1363 | CB  | CB  | . | SER | SER | A | A | 0   | 0   | . | 8.173  | 36.347 | -23.261 | 1.00 | 50.31 | . |
| ATOM | 1364 | OG  | OG  | . | SER | SER | A | A | 0   | 0   | . | 8.749  | 35.245 | -23.955 | 1.00 | 50.92 | . |
| ATOM | 1365 | N   | N   | . | ASP | ASP | A | A | 22  | 22  | . | 5.712  | 34.130 | -23.876 | 1.00 | 68.26 | . |
| ATOM | 1366 | CA  | CA  | . | ASP | ASP | A | A | 22  | 22  | . | 5.174  | 32.800 | -23.602 | 1.00 | 66.93 | . |
| ATOM | 1367 | C   | C   | . | ASP | ASP | A | A | 22  | 22  | . | 6.250  | 31.830 | -23.126 | 1.00 | 63.29 | . |
| ATOM | 1368 | O   | O   | . | ASP | ASP | A | A | 22  | 22  | . | 6.002  | 30.630 | -23.015 | 1.00 | 63.81 | . |
| ATOM | 1369 | CB  | CB  | . | ASP | ASP | A | A | 22  | 22  | . | 4.504  | 32.239 | -24.862 | 1.00 | 71.28 | . |
| ATOM | 1370 | CG  | CG  | . | ASP | ASP | A | A | 22  | 22  | . | 3.741  | 33.300 | -25.639 | 1.00 | 75.97 | . |
| ATOM | 1371 | OD1 | OD1 | . | ASP | ASP | A | A | 22  | 22  | . | 2.933  | 34.028 | -25.021 | 1.00 | 80.52 | . |
| ATOM | 1372 | OD2 | OD2 | . | ASP | ASP | A | A | 22  | 22  | . | 3.947  | 33.403 | -26.870 | 1.00 | 70.15 | . |
| ATOM | 1373 | N   | N   | . | GLU | GLU | A | A | 23  | 23  | . | 7.440  | 32.350 | -22.844 | 1.00 | 59.67 | . |
| ATOM | 1374 | CA  | CA  | . | GLU | GLU | A | A | 23  | 23  | . | 8.542  | 31.514 | -22.390 | 1.00 | 59.63 | . |
| ATOM | 1375 | C   | C   | . | GLU | GLU | A | A | 23  | 23  | . | 9.183  | 32.069 | -21.118 | 1.00 | 56.26 | . |
| ATOM | 1376 | O   | O   | . | GLU | GLU | A | A | 23  | 23  | . | 10.366 | 31.858 | -20.858 | 1.00 | 53.06 | . |
| ATOM | 1377 | CB  | CB  | . | GLU | GLU | A | A | 23  | 23  | . | 9.586  | 31.372 | -23.510 | 1.00 | 65.14 | . |
| ATOM | 1378 | CG  | CG  | . | GLU | GLU | A | A | 23  | 23  | . | 10.675 | 30.342 | -23.232 | 1.00 | 73.21 | . |
| ATOM | 1379 | CD  | CD  | . | GLU | GLU | A | A | 23  | 23  | . | 11.429 | 29.922 | -24.483 | 1.00 | 82.25 | . |
| ATOM | 1380 | OE1 | OE1 | . | GLU | GLU | A | A | 23  | 23  | . | 12.382 | 29.120 | -24.363 | 1.00 | 86.14 | . |
| ATOM | 1381 | OE2 | OE2 | . | GLU | GLU | A | A | 23  | 23  | . | 11.070 | 30.386 | -25.587 | 1.00 | 85.38 | . |
| ATOM | 1382 | N   | N   | . | ASP | ASP | A | A | 24  | 24  | . | 8.388  | 32.783 | -20.327 | 1.00 | 55.49 | . |
| ATOM | 1383 | CA  | CA  | . | ASP | ASP | A | A | 24  | 24  | . | 8.862  | 33.345 | -19.066 | 1.00 | 55.29 | . |
| ATOM | 1384 | C   | C   | . | ASP | ASP | A | A | 24  | 24  | . | 8.437  | 32.382 | -17.960 | 1.00 | 51.70 | . |
| ATOM | 1385 | O   | O   | . | ASP | ASP | A | A | 24  | 24  | . | 8.057  | 32.795 | -16.863 | 1.00 | 53.18 | . |
| ATOM | 1386 | CB  | CB  | . | ASP | ASP | A | A | 24  | 24  | . | 8.244  | 34.731 | -18.825 | 1.00 | 53.20 | . |
| ATOM | 1387 | CG  | CG  | . | ASP | ASP | A | A | 24  | 24  | . | 6.734  | 34.681 | -18.600 | 1.00 | 63.37 | . |
| ATOM | 1388 | OD1 | OD1 | . | ASP | ASP | A | A | 24  | 24  | . | 6.129  | 35.757 | -18.400 | 1.00 | 67.71 | . |
| ATOM | 1389 | OD2 | OD2 | . | ASP | ASP | A | A | 24  | 24  | . | 6.149  | 33.576 | -18.621 | 1.00 | 66.79 | . |
| ATOM | 1390 | N   | N   | . | PHE | PHE | A | A | 25  | 25  | . | 8.509  | 31.090 | -18.262 | 1.00 | 46.37 | . |
| ATOM | 1391 | CA  | CA  | . | PHE | PHE | A | A | 25  | 25  | . | 8.104  | 30.054 | -17.322 | 1.00 | 43.02 | . |
| ATOM | 1392 | C   | C   | . | PHE | PHE | A | A | 25  | 25  | . | 8.962  | 29.901 | -16.076 | 1.00 | 37.35 | . |
| ATOM | 1393 | O   | O   | . | PHE | PHE | A | A | 25  | 25  | . | 10.134 | 30.264 | -16.053 | 1.00 | 34.94 | . |
| ATOM | 1394 | CB  | CB  | . | PHE | PHE | A | A | 25  | 25  | . | 8.004  | 28.704 | -18.039 | 1.00 | 48.23 | . |
| ATOM | 1395 | CG  | CG  | . | PHE | PHE | A | A | 25  | 25  | . | 9.180  | 28.392 | -18.916 | 1.00 | 50.75 | . |
| ATOM | 1396 | CD1 | CD1 | . | PHE | PHE | A | A | 25  | 25  | . | 10.451 | 28.238 | -18.376 | 1.00 | 54.74 | . |
| ATOM | 1397 | CD2 | CD2 | . | PHE | PHE | A | A | 25  | 25  | . | 9.014  | 28.247 | -20.288 | 1.00 | 55.97 | . |
| ATOM | 1398 | CE1 | CE1 | . | PHE | PHE | A | A | 25  | 25  | . | 11.546 | 27.942 | -19.195 | 1.00 | 64.32 | . |

|      |      |     |     |   |     |     |   |   |    |    |   |        |        |         |      |       |   |
|------|------|-----|-----|---|-----|-----|---|---|----|----|---|--------|--------|---------|------|-------|---|
| ATOM | 1399 | CE2 | CE2 | . | PHE | PHE | A | A | 25 | 25 | . | 10.099 | 27.952 | -21.113 | 1.00 | 60.96 | . |
| ATOM | 1400 | CZ  | CZ  | . | PHE | PHE | A | A | 25 | 25 | . | 11.368 | 27.799 | -20.564 | 1.00 | 60.70 | . |
| ATOM | 1401 | N   | N   | . | VAL | VAL | A | A | 26 | 26 | . | 8.342  | 29.357 | -15.034 | 1.00 | 35.80 | . |
| ATOM | 1402 | CA  | CA  | . | VAL | VAL | A | A | 26 | 26 | . | 9.001  | 29.114 | -13.760 | 1.00 | 27.22 | . |
| ATOM | 1403 | C   | C   | . | VAL | VAL | A | A | 26 | 26 | . | 9.806  | 27.837 | -13.934 | 1.00 | 30.24 | . |
| ATOM | 1404 | O   | O   | . | VAL | VAL | A | A | 26 | 26 | . | 9.303  | 26.855 | -14.481 | 1.00 | 28.59 | . |
| ATOM | 1405 | CB  | CB  | . | VAL | VAL | A | A | 26 | 26 | . | 7.961  | 28.920 | -12.643 | 1.00 | 29.39 | . |
| ATOM | 1406 | CG1 | CG1 | . | VAL | VAL | A | A | 26 | 26 | . | 8.657  | 28.697 | -11.322 | 1.00 | 24.16 | . |
| ATOM | 1407 | CG2 | CG2 | . | VAL | VAL | A | A | 26 | 26 | . | 7.047  | 30.136 | -12.573 | 1.00 | 28.87 | . |
| ATOM | 1408 | N   | N   | . | THR | THR | A | A | 27 | 27 | . | 11.048 | 27.845 | -13.462 | 1.00 | 28.75 | . |
| ATOM | 1409 | CA  | CA  | . | THR | THR | A | A | 27 | 27 | . | 11.924 | 26.692 | -13.627 | 1.00 | 27.43 | . |
| ATOM | 1410 | C   | C   | . | THR | THR | A | A | 27 | 27 | . | 12.291 | 25.947 | -12.351 | 1.00 | 24.58 | . |
| ATOM | 1411 | O   | O   | . | THR | THR | A | A | 27 | 27 | . | 12.247 | 26.494 | -11.248 | 1.00 | 0.00  | . |
| ATOM | 1412 | CB  | CB  | . | THR | THR | A | A | 27 | 27 | . | 13.221 | 27.110 | -14.340 | 1.00 | 29.95 | . |
| ATOM | 1413 | OG1 | OG1 | . | THR | THR | A | A | 27 | 27 | . | 13.958 | 28.006 | -13.500 | 1.00 | 34.53 | . |
| ATOM | 1414 | CG2 | CG2 | . | THR | THR | A | A | 27 | 27 | . | 12.897 | 27.816 | -15.655 | 1.00 | 30.45 | . |
| ATOM | 1415 | N   | N   | . | CYS | CYS | A | A | 28 | 28 | . | 12.678 | 24.691 | -12.520 | 1.00 | 18.60 | . |
| ATOM | 1416 | CA  | CA  | . | CYS | CYS | A | A | 28 | 28 | . | 13.041 | 23.850 | -11.395 | 1.00 | 21.71 | . |
| ATOM | 1417 | C   | C   | . | CYS | CYS | A | A | 28 | 28 | . | 14.303 | 24.370 | -10.707 | 1.00 | 0.00  | . |
| ATOM | 1418 | O   | O   | . | CYS | CYS | A | A | 28 | 28 | . | 15.269 | 24.735 | -11.365 | 1.00 | 23.94 | . |
| ATOM | 1419 | CB  | CB  | . | CYS | CYS | A | A | 28 | 28 | . | 13.237 | 22.421 | -11.884 | 1.00 | 25.22 | . |
| ATOM | 1420 | SG  | SG  | . | CYS | CYS | A | A | 28 | 28 | . | 12.735 | 21.174 | -10.668 | 1.00 | 34.40 | . |
| ATOM | 1421 | N   | N   | . | TYR | TYR | A | A | 29 | 29 | . | 14.266 | 24.401 | -9.379  | 1.00 | 18.10 | . |
| ATOM | 1422 | CA  | CA  | . | TYR | TYR | A | A | 29 | 29 | . | 15.354 | 24.896 | -8.536  | 1.00 | 22.23 | . |
| ATOM | 1423 | C   | C   | . | TYR | TYR | A | A | 29 | 29 | . | 15.496 | 26.413 | -8.554  | 1.00 | 23.58 | . |
| ATOM | 1424 | O   | O   | . | TYR | TYR | A | A | 29 | 29 | . | 16.460 | 26.960 | -8.018  | 1.00 | 22.74 | . |
| ATOM | 1425 | CB  | CB  | . | TYR | TYR | A | A | 29 | 29 | . | 16.689 | 24.237 | -8.902  | 1.00 | 24.02 | . |
| ATOM | 1426 | CG  | CG  | . | TYR | TYR | A | A | 29 | 29 | . | 16.721 | 22.772 | -8.547  | 1.00 | 19.27 | . |
| ATOM | 1427 | CD1 | CD1 | . | TYR | TYR | A | A | 29 | 29 | . | 16.456 | 22.348 | -7.246  | 1.00 | 19.92 | . |
| ATOM | 1428 | CD2 | CD2 | . | TYR | TYR | A | A | 29 | 29 | . | 16.975 | 21.808 | -9.516  | 1.00 | 21.97 | . |
| ATOM | 1429 | CE1 | CE1 | . | TYR | TYR | A | A | 29 | 29 | . | 16.438 | 20.996 | -6.922  | 1.00 | 29.97 | . |
| ATOM | 1430 | CE2 | CE2 | . | TYR | TYR | A | A | 29 | 29 | . | 16.960 | 20.459 | -9.206  | 1.00 | 27.20 | . |
| ATOM | 1431 | CZ  | CZ  | . | TYR | TYR | A | A | 29 | 29 | . | 16.692 | 20.057 | -7.910  | 1.00 | 27.70 | . |
| ATOM | 1432 | OH  | OH  | . | TYR | TYR | A | A | 29 | 29 | . | 16.678 | 18.717 | -7.612  | 1.00 | 36.46 | . |
| ATOM | 1433 | N   | N   | . | SER | SER | A | A | 30 | 30 | . | 14.547 | 27.100 | -9.178  | 1.00 | 23.89 | . |
| ATOM | 1434 | CA  | CA  | . | SER | SER | A | A | 30 | 30 | . | 14.603 | 28.554 | -9.184  | 1.00 | 20.88 | . |
| ATOM | 1435 | C   | C   | . | SER | SER | A | A | 30 | 30 | . | 14.223 | 28.977 | -7.762  | 1.00 | 26.23 | . |
| ATOM | 1436 | O   | O   | . | SER | SER | A | A | 30 | 30 | . | 13.589 | 28.212 | -7.034  | 1.00 | 20.15 | . |
| ATOM | 1437 | CB  | CB  | . | SER | SER | A | A | 30 | 30 | . | 13.612 | 29.125 | -10.204 | 1.00 | 32.39 | . |
| ATOM | 1438 | OG  | OG  | . | SER | SER | A | A | 30 | 30 | . | 12.296 | 28.675 | -9.943  | 1.00 | 34.78 | . |
| ATOM | 1439 | N   | N   | . | VAL | VAL | A | A | 31 | 31 | . | 14.632 | 30.175 | -7.357  | 1.00 | 20.82 | . |
| ATOM | 1440 | CA  | CA  | . | VAL | VAL | A | A | 31 | 31 | . | 14.320 | 30.683 | -6.024  | 1.00 | 20.03 | . |
| ATOM | 1441 | C   | C   | . | VAL | VAL | A | A | 31 | 31 | . | 13.468 | 31.920 | -6.213  | 1.00 | 22.76 | . |
| ATOM | 1442 | O   | O   | . | VAL | VAL | A | A | 31 | 31 | . | 13.848 | 32.824 | -6.956  | 1.00 | 19.69 | . |
| ATOM | 1443 | CB  | CB  | . | VAL | VAL | A | A | 31 | 31 | . | 15.586 | 31.095 | -5.248  | 1.00 | 18.30 | . |
| ATOM | 1444 | CG1 | CG1 | . | VAL | VAL | A | A | 31 | 31 | . | 15.198 | 31.706 | -3.917  | 1.00 | 16.03 | . |
| ATOM | 1445 | CG2 | CG2 | . | VAL | VAL | A | A | 31 | 31 | . | 16.472 | 29.894 | -5.021  | 1.00 | 17.26 | . |
| ATOM | 1446 | N   | N   | . | LEU | LEU | A | A | 32 | 32 | . | 12.329 | 31.973 | -5.538  | 1.00 | 19.71 | . |
| ATOM | 1447 | CA  | CA  | . | LEU | LEU | A | A | 32 | 32 | . | 11.445 | 33.118 | -5.691  | 1.00 | 25.12 | . |
| ATOM | 1448 | C   | C   | . | LEU | LEU | A | A | 32 | 32 | . | 10.511 | 33.343 | -4.511  | 1.00 | 18.61 | . |
| ATOM | 1449 | O   | O   | . | LEU | LEU | A | A | 32 | 32 | . | 10.534 | 32.593 | -3.537  | 1.00 | 17.80 | . |
| ATOM | 1450 | CB  | CB  | . | LEU | LEU | A | A | 32 | 32 | . | 10.644 | 32.946 | -6.984  | 1.00 | 38.48 | . |
| ATOM | 1451 | CG  | CG  | . | LEU | LEU | A | A | 32 | 32 | . | 10.229 | 31.502 | -7.265  | 1.00 | 38.83 | . |
| ATOM | 1452 | CD1 | CD1 | . | LEU | LEU | A | A | 32 | 32 | . | 9.129  | 31.120 | -6.319  | 1.00 | 39.95 | . |
| ATOM | 1453 | CD2 | CD2 | . | LEU | LEU | A | A | 32 | 32 | . | 9.775  | 31.336 | -8.701  | 1.00 | 44.74 | . |
| ATOM | 1454 | N   | N   | . | LYS | LYS | A | A | 33 | 33 | . | 9.708  | 34.398 | -4.606  | 1.00 | 14.81 | . |
| ATOM | 1455 | CA  | CA  | . | LYS | LYS | A | A | 33 | 33 | . | 8.741  | 34.747 | -3.574  | 1.00 | 18.14 | . |

|      |      |     |     |   |     |     |   |   |    |    |   |        |        |        |      |       |   |
|------|------|-----|-----|---|-----|-----|---|---|----|----|---|--------|--------|--------|------|-------|---|
| ATOM | 1456 | C   | C   | . | LYS | LYS | A | A | 33 | 33 | . | 7.343  | 34.433 | -4.086 | 1.00 | 16.97 | . |
| ATOM | 1457 | O   | O   | . | LYS | LYS | A | A | 33 | 33 | . | 7.067  | 34.584 | -5.277 | 1.00 | 20.25 | . |
| ATOM | 1458 | CB  | CB  | . | LYS | LYS | A | A | 33 | 33 | . | 8.816  | 36.242 | -3.251 | 1.00 | 17.22 | . |
| ATOM | 1459 | CG  | CG  | . | LYS | LYS | A | A | 33 | 33 | . | 10.159 | 36.721 | -2.744 | 1.00 | 26.26 | . |
| ATOM | 1460 | CD  | CD  | . | LYS | LYS | A | A | 33 | 33 | . | 10.261 | 38.234 | -2.901 | 1.00 | 33.27 | . |
| ATOM | 1461 | CE  | CE  | . | LYS | LYS | A | A | 33 | 33 | . | 11.630 | 38.746 | -2.511 | 1.00 | 51.37 | . |
| ATOM | 1462 | NZ  | NZ  | . | LYS | LYS | A | A | 33 | 33 | . | 11.894 | 40.092 | -3.111 | 1.00 | 62.26 | . |
| ATOM | 1463 | N   | N   | . | PHE | PHE | A | A | 34 | 34 | . | 6.470  | 33.991 | -3.186 | 1.00 | 18.51 | . |
| ATOM | 1464 | CA  | CA  | . | PHE | PHE | A | A | 34 | 34 | . | 5.088  | 33.683 | -3.525 | 1.00 | 17.35 | . |
| ATOM | 1465 | C   | C   | . | PHE | PHE | A | A | 34 | 34 | . | 4.221  | 34.766 | -2.899 | 1.00 | 25.06 | . |
| ATOM | 1466 | O   | O   | . | PHE | PHE | A | A | 34 | 34 | . | 4.102  | 34.849 | -1.676 | 1.00 | 20.95 | . |
| ATOM | 1467 | CB  | CB  | . | PHE | PHE | A | A | 34 | 34 | . | 4.684  | 32.308 | -2.983 | 1.00 | 16.74 | . |
| ATOM | 1468 | CG  | CG  | . | PHE | PHE | A | A | 34 | 34 | . | 5.322  | 31.158 | -3.719 | 1.00 | 22.57 | . |
| ATOM | 1469 | CD1 | CD1 | . | PHE | PHE | A | A | 34 | 34 | . | 6.654  | 30.824 | -3.498 | 1.00 | 31.37 | . |
| ATOM | 1470 | CD2 | CD2 | . | PHE | PHE | A | A | 34 | 34 | . | 4.606  | 30.449 | -4.675 | 1.00 | 30.93 | . |
| ATOM | 1471 | CE1 | CE1 | . | PHE | PHE | A | A | 34 | 34 | . | 7.262  | 29.807 | -4.223 | 1.00 | 29.22 | . |
| ATOM | 1472 | CE2 | CE2 | . | PHE | PHE | A | A | 34 | 34 | . | 5.204  | 29.429 | -5.410 | 1.00 | 27.96 | . |
| ATOM | 1473 | CZ  | CZ  | . | PHE | PHE | A | A | 34 | 34 | . | 6.534  | 29.109 | -5.185 | 1.00 | 27.78 | . |
| ATOM | 1474 | N   | N   | . | ILE | ILE | A | A | 35 | 35 | . | 3.615  | 35.593 | -3.744 | 1.00 | 20.74 | . |
| ATOM | 1475 | CA  | CA  | . | ILE | ILE | A | A | 35 | 35 | . | 2.781  | 36.694 | -3.273 | 1.00 | 21.08 | . |
| ATOM | 1476 | C   | C   | . | ILE | ILE | A | A | 35 | 35 | . | 1.287  | 36.378 | -3.371 | 1.00 | 21.63 | . |
| ATOM | 1477 | O   | O   | . | ILE | ILE | A | A | 35 | 35 | . | 0.807  | 35.922 | -4.411 | 1.00 | 20.71 | . |
| ATOM | 1478 | CB  | CB  | . | ILE | ILE | A | A | 35 | 35 | . | 3.068  | 37.973 | -4.093 | 1.00 | 16.30 | . |
| ATOM | 1479 | CG1 | CG1 | . | ILE | ILE | A | A | 35 | 35 | . | 4.552  | 38.337 | -3.974 | 1.00 | 25.64 | . |
| ATOM | 1480 | CG2 | CG2 | . | ILE | ILE | A | A | 35 | 35 | . | 2.178  | 39.126 | -3.611 | 1.00 | 19.77 | . |
| ATOM | 1481 | CD1 | CD1 | . | ILE | ILE | A | A | 35 | 35 | . | 4.932  | 39.556 | -4.772 | 1.00 | 41.55 | . |
| ATOM | 1482 | N   | N   | . | ASN | ASN | A | A | 36 | 36 | . | 0.546  | 36.620 | -2.297 | 1.00 | 16.26 | . |
| ATOM | 1483 | CA  | CA  | . | ASN | ASN | A | A | 36 | 36 | . | -0.883 | 36.351 | -2.354 | 1.00 | 16.95 | . |
| ATOM | 1484 | C   | C   | . | ASN | ASN | A | A | 36 | 36 | . | -1.545 | 37.436 | -3.193 | 1.00 | 19.05 | . |
| ATOM | 1485 | O   | O   | . | ASN | ASN | A | A | 36 | 36 | . | -1.487 | 38.626 | -2.868 | 1.00 | 21.03 | . |
| ATOM | 1486 | CB  | CB  | . | ASN | ASN | A | A | 36 | 36 | . | -1.483 | 36.291 | -0.951 | 1.00 | 16.89 | . |
| ATOM | 1487 | CG  | CG  | . | ASN | ASN | A | A | 36 | 36 | . | -2.917 | 35.806 | -0.964 | 1.00 | 14.38 | . |
| ATOM | 1488 | OD1 | OD1 | . | ASN | ASN | A | A | 36 | 36 | . | -3.844 | 36.593 | -1.107 | 1.00 | 18.19 | . |
| ATOM | 1489 | ND2 | ND2 | . | ASN | ASN | A | A | 36 | 36 | . | -3.103 | 34.501 | -0.829 | 1.00 | 19.52 | . |
| ATOM | 1490 | N   | N   | . | ALA | ALA | A | A | 37 | 37 | . | -2.153 | 37.010 | -4.294 | 1.00 | 29.08 | . |
| ATOM | 1491 | CA  | CA  | . | ALA | ALA | A | A | 37 | 37 | . | -2.807 | 37.910 | -5.240 | 1.00 | 22.33 | . |
| ATOM | 1492 | C   | C   | . | ALA | ALA | A | A | 37 | 37 | . | -3.721 | 38.987 | -4.664 | 1.00 | 27.07 | . |
| ATOM | 1493 | O   | O   | . | ALA | ALA | A | A | 37 | 37 | . | -3.595 | 40.164 | -5.002 | 1.00 | 28.70 | . |
| ATOM | 1494 | CB  | CB  | . | ALA | ALA | A | A | 37 | 37 | . | -3.582 | 37.090 | -6.264 | 1.00 | 26.81 | . |
| ATOM | 1495 | N   | N   | . | ASN | ASN | A | A | 38 | 38 | . | -4.643 | 38.597 | -3.796 | 1.00 | 27.01 | . |
| ATOM | 1496 | CA  | CA  | . | ASN | ASN | A | A | 38 | 38 | . | -5.590 | 39.550 | -3.241 | 1.00 | 29.10 | . |
| ATOM | 1497 | C   | C   | . | ASN | ASN | A | A | 38 | 38 | . | -5.125 | 40.351 | -2.011 | 1.00 | 32.55 | . |
| ATOM | 1498 | O   | O   | . | ASN | ASN | A | A | 38 | 38 | . | -5.605 | 41.466 | -1.771 | 1.00 | 22.14 | . |
| ATOM | 1499 | CB  | CB  | . | ASN | ASN | A | A | 38 | 38 | . | -6.902 | 38.814 | -2.954 | 1.00 | 33.75 | . |
| ATOM | 1500 | CG  | CG  | . | ASN | ASN | A | A | 38 | 38 | . | -7.560 | 38.263 | -4.231 | 1.00 | 39.89 | . |
| ATOM | 1501 | OD1 | OD1 | . | ASN | ASN | A | A | 38 | 38 | . | -8.464 | 37.423 | -4.168 | 1.00 | 39.69 | . |
| ATOM | 1502 | ND2 | ND2 | . | ASN | ASN | A | A | 38 | 38 | . | -7.114 | 38.748 | -5.390 | 1.00 | 27.62 | . |
| ATOM | 1503 | N   | N   | . | ASP | ASP | A | A | 39 | 39 | . | -4.183 | 39.804 | -1.247 | 1.00 | 29.19 | . |
| ATOM | 1504 | CA  | CA  | . | ASP | ASP | A | A | 39 | 39 | . | -3.686 | 40.494 | -0.056 | 1.00 | 27.69 | . |
| ATOM | 1505 | C   | C   | . | ASP | ASP | A | A | 39 | 39 | . | -2.323 | 41.152 | -0.267 | 1.00 | 22.47 | . |
| ATOM | 1506 | O   | O   | . | ASP | ASP | A | A | 39 | 39 | . | -1.992 | 42.132 | 0.401  | 1.00 | 25.32 | . |
| ATOM | 1507 | CB  | CB  | . | ASP | ASP | A | A | 39 | 39 | . | -3.600 | 39.518 | 1.124  | 1.00 | 33.35 | . |
| ATOM | 1508 | CG  | CG  | . | ASP | ASP | A | A | 39 | 39 | . | -3.242 | 40.209 | 2.419  | 1.00 | 34.85 | . |
| ATOM | 1509 | OD1 | OD1 | . | ASP | ASP | A | A | 39 | 39 | . | -3.853 | 41.260 | 2.708  | 1.00 | 38.48 | . |
| ATOM | 1510 | OD2 | OD2 | . | ASP | ASP | A | A | 39 | 39 | . | -2.365 | 39.706 | 3.149  | 1.00 | 21.75 | . |
| ATOM | 1511 | N   | N   | . | GLY | GLY | A | A | 40 | 40 | . | -1.527 | 40.609 | -1.182 | 1.00 | 18.58 | . |
| ATOM | 1512 | CA  | CA  | . | GLY | GLY | A | A | 40 | 40 | . | -0.209 | 41.178 | -1.440 | 1.00 | 20.86 | . |

|      |      |     |     |   |     |     |   |   |    |    |   |        |        |        |      |       |   |
|------|------|-----|-----|---|-----|-----|---|---|----|----|---|--------|--------|--------|------|-------|---|
| ATOM | 1513 | C   | C   | . | GLY | GLY | A | A | 40 | 40 | . | 0.899  | 40.694 | -0.506 | 1.00 | 20.31 | . |
| ATOM | 1514 | O   | O   | . | GLY | GLY | A | A | 40 | 40 | . | 2.064  | 41.045 | -0.690 | 1.00 | 23.40 | . |
| ATOM | 1515 | N   | N   | . | SER | SER | A | A | 41 | 41 | . | 0.546  | 39.888 | 0.493  | 1.00 | 17.03 | . |
| ATOM | 1516 | CA  | CA  | . | SER | SER | A | A | 41 | 41 | . | 1.526  | 39.361 | 1.444  | 1.00 | 18.80 | . |
| ATOM | 1517 | C   | C   | . | SER | SER | A | A | 41 | 41 | . | 2.366  | 38.237 | 0.821  | 1.00 | 21.39 | . |
| ATOM | 1518 | O   | O   | . | SER | SER | A | A | 41 | 41 | . | 1.910  | 37.549 | -0.095 | 1.00 | 18.73 | . |
| ATOM | 1519 | CB  | CB  | . | SER | SER | A | A | 41 | 41 | . | 0.805  | 38.843 | 2.689  | 1.00 | 12.61 | . |
| ATOM | 1520 | OG  | OG  | . | SER | SER | A | A | 41 | 41 | . | -0.199 | 37.908 | 2.341  | 1.00 | 20.94 | . |
| ATOM | 1521 | N   | N   | . | ARG | ARG | A | A | 42 | 42 | . | 3.587  | 38.053 | 1.322  | 1.00 | 15.64 | . |
| ATOM | 1522 | CA  | CA  | . | ARG | ARG | A | A | 42 | 42 | . | 4.486  | 37.028 | 0.795  | 1.00 | 16.17 | . |
| ATOM | 1523 | C   | C   | . | ARG | ARG | A | A | 42 | 42 | . | 4.558  | 35.794 | 1.676  | 1.00 | 17.24 | . |
| ATOM | 1524 | O   | O   | . | ARG | ARG | A | A | 42 | 42 | . | 4.645  | 35.911 | 2.901  | 1.00 | 14.95 | . |
| ATOM | 1525 | CB  | CB  | . | ARG | ARG | A | A | 42 | 42 | . | 5.903  | 37.581 | 0.632  | 1.00 | 18.32 | . |
| ATOM | 1526 | CG  | CG  | . | ARG | ARG | A | A | 42 | 42 | . | 6.061  | 38.608 | -0.464 | 1.00 | 19.44 | . |
| ATOM | 1527 | CD  | CD  | . | ARG | ARG | A | A | 42 | 42 | . | 5.686  | 39.995 | 0.012  | 1.00 | 31.46 | . |
| ATOM | 1528 | NE  | NE  | . | ARG | ARG | A | A | 42 | 42 | . | 5.611  | 40.944 | -1.096 | 1.00 | 43.52 | . |
| ATOM | 1529 | CZ  | CZ  | . | ARG | ARG | A | A | 42 | 42 | . | 6.634  | 41.277 | -1.873 | 1.00 | 45.62 | . |
| ATOM | 1530 | NH1 | NH1 | . | ARG | ARG | A | A | 42 | 42 | . | 7.833  | 40.743 | -1.671 | 1.00 | 53.39 | . |
| ATOM | 1531 | NH2 | NH2 | . | ARG | ARG | A | A | 42 | 42 | . | 6.454  | 42.146 | -2.858 | 1.00 | 0.00  | . |
| ATOM | 1532 | N   | N   | . | LEU | LEU | A | A | 43 | 43 | . | 4.529  | 34.617 | 1.050  | 1.00 | 11.44 | . |
| ATOM | 1533 | CA  | CA  | . | LEU | LEU | A | A | 43 | 43 | . | 4.613  | 33.352 | 1.791  | 1.00 | 10.82 | . |
| ATOM | 1534 | C   | C   | . | LEU | LEU | A | A | 43 | 43 | . | 5.896  | 33.452 | 2.592  | 1.00 | 12.80 | . |
| ATOM | 1535 | O   | O   | . | LEU | LEU | A | A | 43 | 43 | . | 6.936  | 33.881 | 2.067  | 1.00 | 11.97 | . |
| ATOM | 1536 | CB  | CB  | . | LEU | LEU | A | A | 43 | 43 | . | 4.653  | 32.159 | 0.837  | 1.00 | 12.78 | . |
| ATOM | 1537 | CG  | CG  | . | LEU | LEU | A | A | 43 | 43 | . | 4.489  | 30.796 | 1.521  | 1.00 | 10.91 | . |
| ATOM | 1538 | CD1 | CD1 | . | LEU | LEU | A | A | 43 | 43 | . | 3.177  | 30.749 | 2.269  | 1.00 | 13.86 | . |
| ATOM | 1539 | CD2 | CD2 | . | LEU | LEU | A | A | 43 | 43 | . | 4.543  | 29.692 | 0.480  | 1.00 | 9.77  | . |
| ATOM | 1540 | N   | N   | . | HIS | HIS | A | A | 44 | 44 | . | 5.850  | 33.008 | 3.843  | 1.00 | 13.24 | . |
| ATOM | 1541 | CA  | CA  | . | HIS | HIS | A | A | 44 | 44 | . | 6.996  | 33.218 | 4.718  | 1.00 | 10.40 | . |
| ATOM | 1542 | C   | C   | . | HIS | HIS | A | A | 44 | 44 | . | 7.148  | 32.153 | 5.801  | 1.00 | 17.84 | . |
| ATOM | 1543 | O   | O   | . | HIS | HIS | A | A | 44 | 44 | . | 6.184  | 31.470 | 6.173  | 1.00 | 15.55 | . |
| ATOM | 1544 | CB  | CB  | . | HIS | HIS | A | A | 44 | 44 | . | 6.769  | 34.605 | 5.348  | 1.00 | 15.13 | . |
| ATOM | 1545 | CG  | CG  | . | HIS | HIS | A | A | 44 | 44 | . | 7.875  | 35.107 | 6.228  | 1.00 | 22.74 | . |
| ATOM | 1546 | ND1 | ND1 | . | HIS | HIS | A | A | 44 | 44 | . | 7.931  | 34.839 | 7.578  | 1.00 | 28.39 | . |
| ATOM | 1547 | CD2 | CD2 | . | HIS | HIS | A | A | 44 | 44 | . | 8.902  | 35.953 | 5.970  | 1.00 | 16.33 | . |
| ATOM | 1548 | CE1 | CE1 | . | HIS | HIS | A | A | 44 | 44 | . | 8.942  | 35.500 | 8.116  | 1.00 | 20.73 | . |
| ATOM | 1549 | NE2 | NE2 | . | HIS | HIS | A | A | 44 | 44 | . | 9.546  | 36.184 | 7.161  | 1.00 | 23.95 | . |
| ATOM | 1550 | N   | N   | . | SER | SER | A | A | 45 | 45 | . | 8.370  | 31.994 | 6.286  | 1.00 | 16.17 | . |
| ATOM | 1551 | CA  | CA  | . | SER | SER | A | A | 45 | 45 | . | 8.607  | 31.074 | 7.384  | 1.00 | 16.77 | . |
| ATOM | 1552 | C   | C   | . | SER | SER | A | A | 45 | 45 | . | 9.720  | 31.632 | 8.254  | 1.00 | 24.09 | . |
| ATOM | 1553 | O   | O   | . | SER | SER | A | A | 45 | 45 | . | 10.345 | 32.633 | 7.904  | 1.00 | 20.56 | . |
| ATOM | 1554 | CB  | CB  | . | SER | SER | A | A | 45 | 45 | . | 8.947  | 29.677 | 6.901  | 1.00 | 15.48 | . |
| ATOM | 1555 | OG  | OG  | . | SER | SER | A | A | 45 | 45 | . | 8.748  | 28.766 | 7.974  | 1.00 | 19.35 | . |
| ATOM | 1556 | N   | N   | . | HIS | HIS | A | A | 46 | 46 | . | 9.977  | 30.976 | 9.379  | 1.00 | 20.47 | . |
| ATOM | 1557 | CA  | CA  | . | HIS | HIS | A | A | 46 | 46 | . | 10.971 | 31.469 | 10.321 | 1.00 | 24.37 | . |
| ATOM | 1558 | C   | C   | . | HIS | HIS | A | A | 46 | 46 | . | 11.146 | 30.434 | 11.421 | 1.00 | 24.45 | . |
| ATOM | 1559 | O   | O   | . | HIS | HIS | A | A | 46 | 46 | . | 10.519 | 29.384 | 11.381 | 1.00 | 22.36 | . |
| ATOM | 1560 | CB  | CB  | . | HIS | HIS | A | A | 46 | 46 | . | 10.445 | 32.778 | 10.893 | 1.00 | 21.36 | . |
| ATOM | 1561 | CG  | CG  | . | HIS | HIS | A | A | 46 | 46 | . | 8.963  | 32.768 | 11.106 | 1.00 | 18.89 | . |
| ATOM | 1562 | ND1 | ND1 | . | HIS | HIS | A | A | 46 | 46 | . | 8.206  | 33.917 | 11.166 | 1.00 | 21.40 | . |
| ATOM | 1563 | CD2 | CD2 | . | HIS | HIS | A | A | 46 | 46 | . | 8.096  | 31.739 | 11.273 | 1.00 | 20.77 | . |
| ATOM | 1564 | CE1 | CE1 | . | HIS | HIS | A | A | 46 | 46 | . | 6.938  | 33.598 | 11.362 | 1.00 | 18.99 | . |
| ATOM | 1565 | NE2 | NE2 | . | HIS | HIS | A | A | 46 | 46 | . | 6.845  | 32.282 | 11.431 | 1.00 | 16.44 | . |
| ATOM | 1566 | N   | N   | . | ASP | ASP | A | A | 47 | 47 | . | 11.984 | 30.734 | 12.407 | 1.00 | 29.95 | . |
| ATOM | 1567 | CA  | CA  | . | ASP | ASP | A | A | 47 | 47 | . | 12.236 | 29.795 | 13.496 | 1.00 | 30.32 | . |
| ATOM | 1568 | C   | C   | . | ASP | ASP | A | A | 47 | 47 | . | 11.204 | 29.923 | 14.609 | 1.00 | 34.98 | . |
| ATOM | 1569 | O   | O   | . | ASP | ASP | A | A | 47 | 47 | . | 11.551 | 29.952 | 15.793 | 1.00 | 47.26 | . |

|      |      |     |     |   |     |     |   |   |    |    |   |        |        |        |      |       |   |
|------|------|-----|-----|---|-----|-----|---|---|----|----|---|--------|--------|--------|------|-------|---|
| ATOM | 1570 | CB  | CB  | . | ASP | ASP | A | A | 47 | 47 | . | 13.638 | 30.019 | 14.077 | 1.00 | 34.20 | . |
| ATOM | 1571 | CG  | CG  | . | ASP | ASP | A | A | 47 | 47 | . | 14.169 | 28.795 | 14.804 | 1.00 | 47.14 | . |
| ATOM | 1572 | OD1 | OD1 | . | ASP | ASP | A | A | 47 | 47 | . | 13.375 | 28.120 | 15.494 | 1.00 | 52.03 | . |
| ATOM | 1573 | OD2 | OD2 | . | ASP | ASP | A | A | 47 | 47 | . | 15.382 | 28.511 | 14.691 | 1.00 | 42.39 | . |
| ATOM | 1574 | N   | N   | . | VAL | VAL | A | A | 48 | 48 | . | 9.936  | 30.016 | 14.229 | 1.00 | 32.28 | . |
| ATOM | 1575 | CA  | CA  | . | VAL | VAL | A | A | 48 | 48 | . | 8.846  | 30.122 | 15.191 | 1.00 | 24.97 | . |
| ATOM | 1576 | C   | C   | . | VAL | VAL | A | A | 48 | 48 | . | 7.950  | 28.917 | 14.959 | 1.00 | 36.24 | . |
| ATOM | 1577 | O   | O   | . | VAL | VAL | A | A | 48 | 48 | . | 7.397  | 28.756 | 13.873 | 1.00 | 30.64 | . |
| ATOM | 1578 | CB  | CB  | . | VAL | VAL | A | A | 48 | 48 | . | 8.021  | 31.412 | 14.975 | 1.00 | 29.49 | . |
| ATOM | 1579 | CG1 | CG1 | . | VAL | VAL | A | A | 48 | 48 | . | 6.831  | 31.438 | 15.922 | 1.00 | 22.95 | . |
| ATOM | 1580 | CG2 | CG2 | . | VAL | VAL | A | A | 48 | 48 | . | 8.901  | 32.641 | 15.196 | 1.00 | 27.27 | . |
| ATOM | 1581 | N   | N   | . | LYS | LYS | A | A | 49 | 49 | . | 7.810  | 28.072 | 15.978 | 1.00 | 36.26 | . |
| ATOM | 1582 | CA  | CA  | . | LYS | LYS | A | A | 49 | 49 | . | 6.994  | 26.871 | 15.862 | 1.00 | 33.71 | . |
| ATOM | 1583 | C   | C   | . | LYS | LYS | A | A | 49 | 49 | . | 5.566  | 27.049 | 16.356 | 1.00 | 36.36 | . |
| ATOM | 1584 | O   | O   | . | LYS | LYS | A | A | 49 | 49 | . | 5.283  | 27.932 | 17.164 | 1.00 | 34.90 | . |
| ATOM | 1585 | CB  | CB  | . | LYS | LYS | A | A | 49 | 49 | . | 7.654  | 25.713 | 16.620 | 1.00 | 39.65 | . |
| ATOM | 1586 | CG  | CG  | . | LYS | LYS | A | A | 49 | 49 | . | 9.061  | 25.390 | 16.128 | 1.00 | 51.06 | . |
| ATOM | 1587 | CD  | CD  | . | LYS | LYS | A | A | 49 | 49 | . | 9.519  | 24.001 | 16.545 | 1.00 | 50.82 | . |
| ATOM | 1588 | CE  | CE  | . | LYS | LYS | A | A | 49 | 49 | . | 10.858 | 23.657 | 15.902 | 1.00 | 49.46 | . |
| ATOM | 1589 | NZ  | NZ  | . | LYS | LYS | A | A | 49 | 49 | . | 11.276 | 22.243 | 16.151 | 1.00 | 54.24 | . |
| ATOM | 1590 | N   | N   | . | TYR | TYR | A | A | 50 | 50 | . | 4.667  | 26.208 | 15.851 | 1.00 | 33.34 | . |
| ATOM | 1591 | CA  | CA  | . | TYR | TYR | A | A | 50 | 50 | . | 3.268  | 26.248 | 16.249 | 1.00 | 33.99 | . |
| ATOM | 1592 | C   | C   | . | TYR | TYR | A | A | 50 | 50 | . | 3.149  | 25.726 | 17.670 | 1.00 | 41.58 | . |
| ATOM | 1593 | O   | O   | . | TYR | TYR | A | A | 50 | 50 | . | 3.989  | 24.957 | 18.136 | 1.00 | 42.00 | . |
| ATOM | 1594 | CB  | CB  | . | TYR | TYR | A | A | 50 | 50 | . | 2.406  | 25.359 | 15.348 | 1.00 | 38.38 | . |
| ATOM | 1595 | CG  | CG  | . | TYR | TYR | A | A | 50 | 50 | . | 2.135  | 25.894 | 13.958 | 1.00 | 37.31 | . |
| ATOM | 1596 | CD1 | CD1 | . | TYR | TYR | A | A | 50 | 50 | . | 1.508  | 27.128 | 13.771 | 1.00 | 34.21 | . |
| ATOM | 1597 | CD2 | CD2 | . | TYR | TYR | A | A | 50 | 50 | . | 2.462  | 25.141 | 12.829 | 1.00 | 30.81 | . |
| ATOM | 1598 | CE1 | CE1 | . | TYR | TYR | A | A | 50 | 50 | . | 1.209  | 27.598 | 12.489 | 1.00 | 33.56 | . |
| ATOM | 1599 | CE2 | CE2 | . | TYR | TYR | A | A | 50 | 50 | . | 2.169  | 25.600 | 11.546 | 1.00 | 29.03 | . |
| ATOM | 1600 | CZ  | CZ  | . | TYR | TYR | A | A | 50 | 50 | . | 1.543  | 26.827 | 11.382 | 1.00 | 34.74 | . |
| ATOM | 1601 | OH  | OH  | . | TYR | TYR | A | A | 50 | 50 | . | 1.243  | 27.278 | 10.116 | 1.00 | 27.67 | . |
| ATOM | 1602 | N   | N   | . | GLY | GLY | A | A | 51 | 51 | . | 2.093  | 26.149 | 18.349 | 1.00 | 45.04 | . |
| ATOM | 1603 | CA  | CA  | . | GLY | GLY | A | A | 51 | 51 | . | 1.847  | 25.708 | 19.704 | 1.00 | 52.07 | . |
| ATOM | 1604 | C   | C   | . | GLY | GLY | A | A | 51 | 51 | . | 0.415  | 25.227 | 19.728 | 1.00 | 58.90 | . |
| ATOM | 1605 | O   | O   | . | GLY | GLY | A | A | 51 | 51 | . | -0.384 | 25.672 | 20.551 | 1.00 | 62.54 | . |
| ATOM | 1606 | N   | N   | . | SER | SER | A | A | 52 | 52 | . | 0.088  | 24.322 | 18.809 | 1.00 | 59.77 | . |
| ATOM | 1607 | CA  | CA  | . | SER | SER | A | A | 52 | 52 | . | -1.265 | 23.794 | 18.716 | 1.00 | 60.84 | . |
| ATOM | 1608 | C   | C   | . | SER | SER | A | A | 52 | 52 | . | -1.370 | 22.455 | 17.980 | 1.00 | 60.63 | . |
| ATOM | 1609 | O   | O   | . | SER | SER | A | A | 52 | 52 | . | -1.536 | 21.410 | 18.608 | 1.00 | 69.40 | . |
| ATOM | 1610 | CB  | CB  | . | SER | SER | A | A | 52 | 52 | . | -2.173 | 24.827 | 18.042 | 1.00 | 62.63 | . |
| ATOM | 1611 | OG  | OG  | . | SER | SER | A | A | 52 | 52 | . | -1.625 | 25.266 | 16.806 | 1.00 | 61.55 | . |
| ATOM | 1612 | N   | N   | . | GLY | GLY | A | A | 53 | 53 | . | -1.275 | 22.488 | 16.655 | 1.00 | 53.19 | . |
| ATOM | 1613 | CA  | CA  | . | GLY | GLY | A | A | 53 | 53 | . | -1.394 | 21.270 | 15.869 | 1.00 | 48.98 | . |
| ATOM | 1614 | C   | C   | . | GLY | GLY | A | A | 53 | 53 | . | -0.265 | 20.262 | 15.992 | 1.00 | 51.02 | . |
| ATOM | 1615 | O   | O   | . | GLY | GLY | A | A | 53 | 53 | . | -0.210 | 19.481 | 16.942 | 1.00 | 46.29 | . |
| ATOM | 1616 | N   | N   | . | SER | SER | A | A | 54 | 54 | . | 0.634  | 20.270 | 15.014 | 1.00 | 43.61 | . |
| ATOM | 1617 | CA  | CA  | . | SER | SER | A | A | 54 | 54 | . | 1.767  | 19.351 | 14.996 | 1.00 | 38.34 | . |
| ATOM | 1618 | C   | C   | . | SER | SER | A | A | 54 | 54 | . | 2.923  | 19.916 | 15.804 | 1.00 | 38.29 | . |
| ATOM | 1619 | O   | O   | . | SER | SER | A | A | 54 | 54 | . | 3.861  | 19.200 | 16.149 | 1.00 | 39.48 | . |
| ATOM | 1620 | CB  | CB  | . | SER | SER | A | A | 54 | 54 | . | 2.235  | 19.122 | 13.556 | 1.00 | 45.61 | . |
| ATOM | 1621 | OG  | OG  | . | SER | SER | A | A | 54 | 54 | . | 2.833  | 20.298 | 13.025 | 1.00 | 35.65 | . |
| ATOM | 1622 | N   | N   | . | GLY | GLY | A | A | 55 | 55 | . | 2.852  | 21.208 | 16.099 | 1.00 | 36.84 | . |
| ATOM | 1623 | CA  | CA  | . | GLY | GLY | A | A | 55 | 55 | . | 3.919  | 21.840 | 16.846 | 1.00 | 34.17 | . |
| ATOM | 1624 | C   | C   | . | GLY | GLY | A | A | 55 | 55 | . | 5.156  | 22.009 | 15.982 | 1.00 | 31.24 | . |
| ATOM | 1625 | O   | O   | . | GLY | GLY | A | A | 55 | 55 | . | 6.256  | 22.214 | 16.495 | 1.00 | 27.38 | . |
| ATOM | 1626 | N   | N   | . | GLN | GLN | A | A | 56 | 56 | . | 4.985  | 21.910 | 14.666 | 1.00 | 27.92 | . |



|      |      |     |     |   |     |     |   |   |    |    |   |        |        |        |      |       |   |
|------|------|-----|-----|---|-----|-----|---|---|----|----|---|--------|--------|--------|------|-------|---|
| ATOM | 1627 | CA  | CA  | . | GLN | GLN | A | A | 56 | 56 | . | 6.106  | 22.073 | 13.742 | 1.00 | 27.72 | . |
| ATOM | 1628 | C   | C   | . | GLN | GLN | A | A | 56 | 56 | . | 6.299  | 23.558 | 13.429 | 1.00 | 23.04 | . |
| ATOM | 1629 | O   | O   | . | GLN | GLN | A | A | 56 | 56 | . | 5.508  | 24.392 | 13.856 | 1.00 | 22.32 | . |
| ATOM | 1630 | CB  | CB  | . | GLN | GLN | A | A | 56 | 56 | . | 5.847  | 21.303 | 12.445 | 1.00 | 25.38 | . |
| ATOM | 1631 | CG  | CG  | . | GLN | GLN | A | A | 56 | 56 | . | 5.633  | 19.817 | 12.645 | 1.00 | 37.82 | . |
| ATOM | 1632 | CD  | CD  | . | GLN | GLN | A | A | 56 | 56 | . | 5.376  | 19.088 | 11.342 | 1.00 | 39.23 | . |
| ATOM | 1633 | OE1 | OE1 | . | GLN | GLN | A | A | 56 | 56 | . | 4.722  | 19.612 | 10.446 | 1.00 | 30.71 | . |
| ATOM | 1634 | NE2 | NE2 | . | GLN | GLN | A | A | 56 | 56 | . | 5.877  | 17.862 | 11.239 | 1.00 | 40.25 | . |
| ATOM | 1635 | N   | N   | . | GLN | GLN | A | A | 57 | 57 | . | 7.346  | 23.875 | 12.676 | 1.00 | 23.53 | . |
| ATOM | 1636 | CA  | CA  | . | GLN | GLN | A | A | 57 | 57 | . | 7.651  | 25.256 | 12.309 | 1.00 | 23.22 | . |
| ATOM | 1637 | C   | C   | . | GLN | GLN | A | A | 57 | 57 | . | 6.471  | 25.867 | 11.568 | 1.00 | 22.82 | . |
| ATOM | 1638 | O   | O   | . | GLN | GLN | A | A | 57 | 57 | . | 5.940  | 25.264 | 10.640 | 1.00 | 23.62 | . |
| ATOM | 1639 | CB  | CB  | . | GLN | GLN | A | A | 57 | 57 | . | 8.891  | 25.295 | 11.421 | 1.00 | 21.79 | . |
| ATOM | 1640 | CG  | CG  | . | GLN | GLN | A | A | 57 | 57 | . | 9.487  | 26.673 | 11.250 | 1.00 | 18.27 | . |
| ATOM | 1641 | CD  | CD  | . | GLN | GLN | A | A | 57 | 57 | . | 10.762 | 26.637 | 10.446 | 1.00 | 29.61 | . |
| ATOM | 1642 | OE1 | OE1 | . | GLN | GLN | A | A | 57 | 57 | . | 10.787 | 27.014 | 9.267  | 1.00 | 25.89 | . |
| ATOM | 1643 | NE2 | NE2 | . | GLN | GLN | A | A | 57 | 57 | . | 11.832 | 26.162 | 11.068 | 1.00 | 22.57 | . |
| ATOM | 1644 | N   | N   | . | SER | SER | A | A | 58 | 58 | . | 6.068  | 27.065 | 11.978 | 1.00 | 24.36 | . |
| ATOM | 1645 | CA  | CA  | . | SER | SER | A | A | 58 | 58 | . | 4.935  | 27.735 | 11.357 | 1.00 | 20.75 | . |
| ATOM | 1646 | C   | C   | . | SER | SER | A | A | 58 | 58 | . | 5.238  | 28.338 | 9.983  | 1.00 | 24.93 | . |
| ATOM | 1647 | O   | O   | . | SER | SER | A | A | 58 | 58 | . | 6.398  | 28.535 | 9.606  | 1.00 | 20.82 | . |
| ATOM | 1648 | CB  | CB  | . | SER | SER | A | A | 58 | 58 | . | 4.413  | 28.842 | 12.270 | 1.00 | 22.06 | . |
| ATOM | 1649 | OG  | OG  | . | SER | SER | A | A | 58 | 58 | . | 5.361  | 29.885 | 12.405 | 1.00 | 28.40 | . |
| ATOM | 1650 | N   | N   | . | VAL | VAL | A | A | 59 | 59 | . | 4.166  | 28.628 | 9.249  | 1.00 | 22.74 | . |
| ATOM | 1651 | CA  | CA  | . | VAL | VAL | A | A | 59 | 59 | . | 4.243  | 29.243 | 7.928  | 1.00 | 18.26 | . |
| ATOM | 1652 | C   | C   | . | VAL | VAL | A | A | 59 | 59 | . | 3.232  | 30.376 | 7.946  | 1.00 | 17.40 | . |
| ATOM | 1653 | O   | O   | . | VAL | VAL | A | A | 59 | 59 | . | 2.099  | 30.191 | 8.382  | 1.00 | 22.30 | . |
| ATOM | 1654 | CB  | CB  | . | VAL | VAL | A | A | 59 | 59 | . | 3.846  | 28.258 | 6.809  | 1.00 | 19.67 | . |
| ATOM | 1655 | CG1 | CG1 | . | VAL | VAL | A | A | 59 | 59 | . | 3.731  | 29.000 | 5.474  | 1.00 | 13.08 | . |
| ATOM | 1656 | CG2 | CG2 | . | VAL | VAL | A | A | 59 | 59 | . | 4.880  | 27.144 | 6.707  | 1.00 | 18.01 | . |
| ATOM | 1657 | N   | N   | . | THR | THR | A | A | 60 | 60 | . | 3.640  | 31.550 | 7.485  | 1.00 | 19.62 | . |
| ATOM | 1658 | CA  | CA  | . | THR | THR | A | A | 60 | 60 | . | 2.747  | 32.703 | 7.460  | 1.00 | 17.41 | . |
| ATOM | 1659 | C   | C   | . | THR | THR | A | A | 60 | 60 | . | 2.898  | 33.460 | 6.147  | 1.00 | 16.60 | . |
| ATOM | 1660 | O   | O   | . | THR | THR | A | A | 60 | 60 | . | 3.578  | 33.006 | 5.224  | 1.00 | 17.67 | . |
| ATOM | 1661 | CB  | CB  | . | THR | THR | A | A | 60 | 60 | . | 3.094  | 33.698 | 8.583  | 1.00 | 22.94 | . |
| ATOM | 1662 | OG1 | OG1 | . | THR | THR | A | A | 60 | 60 | . | 4.344  | 34.338 | 8.270  | 1.00 | 15.08 | . |
| ATOM | 1663 | CG2 | CG2 | . | THR | THR | A | A | 60 | 60 | . | 3.217  | 32.973 | 9.931  | 1.00 | 17.23 | . |
| ATOM | 1664 | N   | N   | . | ALA | ALA | A | A | 61 | 61 | . | 2.250  | 34.620 | 6.076  | 1.00 | 16.39 | . |
| ATOM | 1665 | CA  | CA  | . | ALA | ALA | A | A | 61 | 61 | . | 2.349  | 35.490 | 4.916  | 1.00 | 16.69 | . |
| ATOM | 1666 | C   | C   | . | ALA | ALA | A | A | 61 | 61 | . | 2.621  | 36.867 | 5.505  | 1.00 | 19.41 | . |
| ATOM | 1667 | O   | O   | . | ALA | ALA | A | A | 61 | 61 | . | 1.900  | 37.319 | 6.400  | 1.00 | 19.59 | . |
| ATOM | 1668 | CB  | CB  | . | ALA | ALA | A | A | 61 | 61 | . | 1.057  | 35.489 | 4.120  | 1.00 | 20.71 | . |
| ATOM | 1669 | N   | N   | . | VAL | VAL | A | A | 62 | 62 | . | 3.653  | 37.535 | 5.001  | 1.00 | 14.96 | . |
| ATOM | 1670 | CA  | CA  | . | VAL | VAL | A | A | 62 | 62 | . | 4.034  | 38.841 | 5.523  | 1.00 | 21.07 | . |
| ATOM | 1671 | C   | C   | . | VAL | VAL | A | A | 62 | 62 | . | 3.862  | 40.028 | 4.583  | 1.00 | 16.54 | . |
| ATOM | 1672 | O   | O   | . | VAL | VAL | A | A | 62 | 62 | . | 4.153  | 39.946 | 3.392  | 1.00 | 18.70 | . |
| ATOM | 1673 | CB  | CB  | . | VAL | VAL | A | A | 62 | 62 | . | 5.505  | 38.815 | 5.983  | 1.00 | 16.05 | . |
| ATOM | 1674 | CG1 | CG1 | . | VAL | VAL | A | A | 62 | 62 | . | 5.661  | 37.832 | 7.133  | 1.00 | 22.34 | . |
| ATOM | 1675 | CG2 | CG2 | . | VAL | VAL | A | A | 62 | 62 | . | 6.406  | 38.402 | 4.819  | 1.00 | 15.79 | . |
| ATOM | 1676 | N   | N   | . | LYS | LYS | A | A | 63 | 63 | . | 3.390  | 41.135 | 5.146  | 1.00 | 25.55 | . |
| ATOM | 1677 | CA  | CA  | . | LYS | LYS | A | A | 63 | 63 | . | 3.211  | 42.378 | 4.410  | 1.00 | 31.01 | . |
| ATOM | 1678 | C   | C   | . | LYS | LYS | A | A | 63 | 63 | . | 4.505  | 43.142 | 4.673  | 1.00 | 37.98 | . |
| ATOM | 1679 | O   | O   | . | LYS | LYS | A | A | 63 | 63 | . | 4.509  | 44.227 | 5.247  | 1.00 | 50.47 | . |
| ATOM | 1680 | CB  | CB  | . | LYS | LYS | A | A | 63 | 63 | . | 1.988  | 43.133 | 4.951  | 1.00 | 35.64 | . |
| ATOM | 1681 | CG  | CG  | . | LYS | LYS | A | A | 63 | 63 | . | 1.866  | 44.591 | 4.517  | 1.00 | 50.20 | . |
| ATOM | 1682 | CD  | CD  | . | LYS | LYS | A | A | 63 | 63 | . | 1.973  | 44.773 | 3.010  | 1.00 | 55.71 | . |
| ATOM | 1683 | CE  | CE  | . | LYS | LYS | A | A | 63 | 63 | . | 1.890  | 46.253 | 2.637  | 1.00 | 60.22 | . |

|      |      |     |     |   |     |     |   |   |    |    |   |        |        |        |      |       |   |
|------|------|-----|-----|---|-----|-----|---|---|----|----|---|--------|--------|--------|------|-------|---|
| ATOM | 1684 | NZ  | NZ  | . | LYS | LYS | A | A | 63 | 63 | . | 2.930  | 47.074 | 3.335  | 1.00 | 52.14 | . |
| ATOM | 1685 | N   | N   | . | ASN | ASN | A | A | 64 | 64 | . | 5.611  | 42.530 | 4.265  | 1.00 | 49.82 | . |
| ATOM | 1686 | CA  | CA  | . | ASN | ASN | A | A | 64 | 64 | . | 6.945  | 43.086 | 4.448  | 1.00 | 49.83 | . |
| ATOM | 1687 | C   | C   | . | ASN | ASN | A | A | 64 | 64 | . | 7.827  | 42.662 | 3.283  | 1.00 | 53.43 | . |
| ATOM | 1688 | O   | O   | . | ASN | ASN | A | A | 64 | 64 | . | 8.482  | 41.617 | 3.328  | 1.00 | 52.17 | . |
| ATOM | 1689 | CB  | CB  | . | ASN | ASN | A | A | 64 | 64 | . | 7.543  | 42.582 | 5.766  | 1.00 | 58.88 | . |
| ATOM | 1690 | CG  | CG  | . | ASN | ASN | A | A | 64 | 64 | . | 9.058  | 42.555 | 5.747  | 1.00 | 61.79 | . |
| ATOM | 1691 | OD1 | OD1 | . | ASN | ASN | A | A | 64 | 64 | . | 9.705  | 43.571 | 5.501  | 1.00 | 69.82 | . |
| ATOM | 1692 | ND2 | ND2 | . | ASN | ASN | A | A | 64 | 64 | . | 9.632  | 41.384 | 6.004  | 1.00 | 63.98 | . |
| ATOM | 1693 | N   | N   | . | SER | SER | A | A | 65 | 65 | . | 7.839  | 43.490 | 2.245  | 1.00 | 52.80 | . |
| ATOM | 1694 | CA  | CA  | . | SER | SER | A | A | 65 | 65 | . | 8.616  | 43.230 | 1.039  | 1.00 | 62.28 | . |
| ATOM | 1695 | C   | C   | . | SER | SER | A | A | 65 | 65 | . | 10.060 | 42.795 | 1.279  | 1.00 | 65.05 | . |
| ATOM | 1696 | O   | O   | . | SER | SER | A | A | 65 | 65 | . | 10.601 | 42.942 | 2.377  | 1.00 | 66.34 | . |
| ATOM | 1697 | CB  | CB  | . | SER | SER | A | A | 65 | 65 | . | 8.612  | 44.473 | 0.145  | 1.00 | 59.10 | . |
| ATOM | 1698 | OG  | OG  | . | SER | SER | A | A | 65 | 65 | . | 9.398  | 44.262 | -1.013 | 1.00 | 64.88 | . |
| ATOM | 1699 | N   | N   | . | ASP | ASP | A | A | 66 | 66 | . | 10.665 | 42.255 | 0.225  | 1.00 | 65.79 | . |
| ATOM | 1700 | CA  | CA  | . | ASP | ASP | A | A | 66 | 66 | . | 12.049 | 41.796 | 0.232  | 1.00 | 68.45 | . |
| ATOM | 1701 | C   | C   | . | ASP | ASP | A | A | 66 | 66 | . | 12.596 | 41.382 | 1.604  | 1.00 | 67.58 | . |
| ATOM | 1702 | O   | O   | . | ASP | ASP | A | A | 66 | 66 | . | 13.089 | 42.217 | 2.368  | 1.00 | 67.39 | . |
| ATOM | 1703 | CB  | CB  | . | ASP | ASP | A | A | 66 | 66 | . | 12.945 | 42.886 | -0.376 | 1.00 | 72.29 | . |
| ATOM | 1704 | CG  | CG  | . | ASP | ASP | A | A | 66 | 66 | . | 13.795 | 42.374 | -1.531 | 1.00 | 75.91 | . |
| ATOM | 1705 | OD1 | OD1 | . | ASP | ASP | A | A | 66 | 66 | . | 14.539 | 43.180 | -2.134 | 1.00 | 78.05 | . |
| ATOM | 1706 | OD2 | OD2 | . | ASP | ASP | A | A | 66 | 66 | . | 13.721 | 41.165 | -1.839 | 1.00 | 79.93 | . |
| ATOM | 1707 | N   | N   | . | ASP | ASP | A | A | 67 | 67 | . | 12.502 | 40.089 | 1.905  | 1.00 | 58.48 | . |
| ATOM | 1708 | CA  | CA  | . | ASP | ASP | A | A | 67 | 67 | . | 13.001 | 39.529 | 3.163  | 1.00 | 48.34 | . |
| ATOM | 1709 | C   | C   | . | ASP | ASP | A | A | 67 | 67 | . | 13.495 | 38.118 | 2.842  | 1.00 | 41.75 | . |
| ATOM | 1710 | O   | O   | . | ASP | ASP | A | A | 67 | 67 | . | 12.782 | 37.329 | 2.217  | 1.00 | 31.83 | . |
| ATOM | 1711 | CB  | CB  | . | ASP | ASP | A | A | 67 | 67 | . | 11.886 | 39.478 | 4.219  | 1.00 | 57.14 | . |
| ATOM | 1712 | CG  | CG  | . | ASP | ASP | A | A | 67 | 67 | . | 12.370 | 38.947 | 5.570  | 1.00 | 56.40 | . |
| ATOM | 1713 | OD1 | OD1 | . | ASP | ASP | A | A | 67 | 67 | . | 11.571 | 38.941 | 6.532  | 1.00 | 59.39 | . |
| ATOM | 1714 | OD2 | OD2 | . | ASP | ASP | A | A | 67 | 67 | . | 13.542 | 38.533 | 5.675  | 1.00 | 54.73 | . |
| ATOM | 1715 | N   | N   | . | ILE | ILE | A | A | 68 | 68 | . | 14.718 | 37.814 | 3.262  | 1.00 | 32.35 | . |
| ATOM | 1716 | CA  | CA  | . | ILE | ILE | A | A | 68 | 68 | . | 15.319 | 36.514 | 3.000  | 1.00 | 25.91 | . |
| ATOM | 1717 | C   | C   | . | ILE | ILE | A | A | 68 | 68 | . | 14.474 | 35.329 | 3.481  | 1.00 | 19.03 | . |
| ATOM | 1718 | O   | O   | . | ILE | ILE | A | A | 68 | 68 | . | 14.504 | 34.258 | 2.875  | 1.00 | 19.16 | . |
| ATOM | 1719 | CB  | CB  | . | ILE | ILE | A | A | 68 | 68 | . | 16.742 | 36.432 | 3.622  | 1.00 | 34.74 | . |
| ATOM | 1720 | CG1 | CG1 | . | ILE | ILE | A | A | 68 | 68 | . | 17.419 | 35.117 | 3.216  | 1.00 | 33.93 | . |
| ATOM | 1721 | CG2 | CG2 | . | ILE | ILE | A | A | 68 | 68 | . | 16.663 | 36.551 | 5.136  | 1.00 | 32.14 | . |
| ATOM | 1722 | CD1 | CD1 | . | ILE | ILE | A | A | 68 | 68 | . | 17.638 | 34.969 | 1.717  | 1.00 | 39.73 | . |
| ATOM | 1723 | N   | N   | . | ASN | ASN | A | A | 69 | 69 | . | 13.725 | 35.515 | 4.563  | 1.00 | 15.02 | . |
| ATOM | 1724 | CA  | CA  | . | ASN | ASN | A | A | 69 | 69 | . | 12.884 | 34.448 | 5.080  | 1.00 | 19.43 | . |
| ATOM | 1725 | C   | C   | . | ASN | ASN | A | A | 69 | 69 | . | 11.626 | 34.258 | 4.227  | 1.00 | 18.39 | . |
| ATOM | 1726 | O   | O   | . | ASN | ASN | A | A | 69 | 69 | . | 10.786 | 33.424 | 4.553  | 1.00 | 15.94 | . |
| ATOM | 1727 | CB  | CB  | . | ASN | ASN | A | A | 69 | 69 | . | 12.480 | 34.724 | 6.537  | 1.00 | 16.04 | . |
| ATOM | 1728 | CG  | CG  | . | ASN | ASN | A | A | 69 | 69 | . | 13.662 | 34.639 | 7.498  | 1.00 | 22.48 | . |
| ATOM | 1729 | OD1 | OD1 | . | ASN | ASN | A | A | 69 | 69 | . | 14.339 | 33.615 | 7.576  | 1.00 | 24.04 | . |
| ATOM | 1730 | ND2 | ND2 | . | ASN | ASN | A | A | 69 | 69 | . | 13.917 | 35.719 | 8.221  | 1.00 | 25.64 | . |
| ATOM | 1731 | N   | N   | . | SER | SER | A | A | 70 | 70 | . | 11.499 | 35.032 | 3.148  | 1.00 | 10.93 | . |
| ATOM | 1732 | CA  | CA  | . | SER | SER | A | A | 70 | 70 | . | 10.341 | 34.913 | 2.261  | 1.00 | 16.19 | . |
| ATOM | 1733 | C   | C   | . | SER | SER | A | A | 70 | 70 | . | 10.726 | 34.224 | 0.962  | 1.00 | 21.33 | . |
| ATOM | 1734 | O   | O   | . | SER | SER | A | A | 70 | 70 | . | 9.923  | 34.160 | 0.022  | 1.00 | 17.16 | . |
| ATOM | 1735 | CB  | CB  | . | SER | SER | A | A | 70 | 70 | . | 9.747  | 36.289 | 1.931  | 1.00 | 22.74 | . |
| ATOM | 1736 | OG  | OG  | . | SER | SER | A | A | 70 | 70 | . | 9.201  | 36.900 | 3.089  | 1.00 | 20.35 | . |
| ATOM | 1737 | N   | N   | . | HIS | HIS | A | A | 71 | 71 | . | 11.960 | 33.729 | 0.898  | 1.00 | 15.32 | . |
| ATOM | 1738 | CA  | CA  | . | HIS | HIS | A | A | 71 | 71 | . | 12.420 | 33.045 | -0.303 | 1.00 | 15.60 | . |
| ATOM | 1739 | C   | C   | . | HIS | HIS | A | A | 71 | 71 | . | 12.238 | 31.545 | -0.213 | 1.00 | 17.97 | . |
| ATOM | 1740 | O   | O   | . | HIS | HIS | A | A | 71 | 71 | . | 12.542 | 30.928 | 0.821  | 1.00 | 15.73 | . |

|      |      |     |     |   |     |     |   |   |    |    |   |        |        |        |      |       |   |
|------|------|-----|-----|---|-----|-----|---|---|----|----|---|--------|--------|--------|------|-------|---|
| ATOM | 1741 | CB  | CB  | . | HIS | HIS | A | A | 71 | 71 | . | 13.884 | 33.375 | -0.582 | 1.00 | 20.63 | . |
| ATOM | 1742 | CG  | CG  | . | HIS | HIS | A | A | 71 | 71 | . | 14.084 | 34.773 | -1.069 | 1.00 | 29.15 | . |
| ATOM | 1743 | ND1 | ND1 | . | HIS | HIS | A | A | 71 | 71 | . | 14.055 | 35.862 | -0.228 | 1.00 | 34.25 | . |
| ATOM | 1744 | CD2 | CD2 | . | HIS | HIS | A | A | 71 | 71 | . | 14.219 | 35.268 | -2.321 | 1.00 | 34.44 | . |
| ATOM | 1745 | CE1 | CE1 | . | HIS | HIS | A | A | 71 | 71 | . | 14.160 | 36.969 | -0.941 | 1.00 | 32.66 | . |
| ATOM | 1746 | NE2 | NE2 | . | HIS | HIS | A | A | 71 | 71 | . | 14.259 | 36.637 | -2.215 | 1.00 | 36.38 | . |
| ATOM | 1747 | N   | N   | . | TRP | TRP | A | A | 72 | 72 | . | 11.731 | 30.976 | -1.306 | 1.00 | 12.16 | . |
| ATOM | 1748 | CA  | CA  | . | TRP | TRP | A | A | 72 | 72 | . | 11.481 | 29.546 | -1.408 | 1.00 | 11.86 | . |
| ATOM | 1749 | C   | C   | . | TRP | TRP | A | A | 72 | 72 | . | 12.102 | 28.986 | -2.676 | 1.00 | 14.14 | . |
| ATOM | 1750 | O   | O   | . | TRP | TRP | A | A | 72 | 72 | . | 12.168 | 29.664 | -3.701 | 1.00 | 21.98 | . |
| ATOM | 1751 | CB  | CB  | . | TRP | TRP | A | A | 72 | 72 | . | 9.979  | 29.267 | -1.441 | 1.00 | 17.14 | . |
| ATOM | 1752 | CG  | CG  | . | TRP | TRP | A | A | 72 | 72 | . | 9.243  | 29.782 | -0.266 | 1.00 | 10.73 | . |
| ATOM | 1753 | CD1 | CD1 | . | TRP | TRP | A | A | 72 | 72 | . | 8.842  | 31.068 | -0.046 | 1.00 | 11.99 | . |
| ATOM | 1754 | CD2 | CD2 | . | TRP | TRP | A | A | 72 | 72 | . | 8.818  | 29.025 | 0.864  | 1.00 | 6.42  | . |
| ATOM | 1755 | NE1 | NE1 | . | TRP | TRP | A | A | 72 | 72 | . | 8.189  | 31.157 | 1.162  | 1.00 | 13.45 | . |
| ATOM | 1756 | CE2 | CE2 | . | TRP | TRP | A | A | 72 | 72 | . | 8.160  | 29.915 | 1.739  | 1.00 | 9.57  | . |
| ATOM | 1757 | CE3 | CE3 | . | TRP | TRP | A | A | 72 | 72 | . | 8.928  | 27.671 | 1.226  | 1.00 | 15.25 | . |
| ATOM | 1758 | CZ2 | CZ2 | . | TRP | TRP | A | A | 72 | 72 | . | 7.610  | 29.500 | 2.954  | 1.00 | 12.29 | . |
| ATOM | 1759 | CZ3 | CZ3 | . | TRP | TRP | A | A | 72 | 72 | . | 8.382  | 27.256 | 2.433  | 1.00 | 10.32 | . |
| ATOM | 1760 | CH2 | CH2 | . | TRP | TRP | A | A | 72 | 72 | . | 7.729  | 28.171 | 3.283  | 1.00 | 12.75 | . |
| ATOM | 1761 | N   | N   | . | GLN | GLN | A | A | 73 | 73 | . | 12.548 | 27.739 | -2.616 | 1.00 | 17.71 | . |
| ATOM | 1762 | CA  | CA  | . | GLN | GLN | A | A | 73 | 73 | . | 13.143 | 27.116 | -3.783 | 1.00 | 14.84 | . |
| ATOM | 1763 | C   | C   | . | GLN | GLN | A | A | 73 | 73 | . | 12.281 | 25.983 | -4.296 | 1.00 | 12.80 | . |
| ATOM | 1764 | O   | O   | . | GLN | GLN | A | A | 73 | 73 | . | 11.880 | 25.091 | -3.547 | 1.00 | 14.15 | . |
| ATOM | 1765 | CB  | CB  | . | GLN | GLN | A | A | 73 | 73 | . | 14.540 | 26.589 | -3.457 | 1.00 | 17.45 | . |
| ATOM | 1766 | CG  | CG  | . | GLN | GLN | A | A | 73 | 73 | . | 15.230 | 25.952 | -4.653 | 1.00 | 13.96 | . |
| ATOM | 1767 | CD  | CD  | . | GLN | GLN | A | A | 73 | 73 | . | 16.701 | 25.725 | -4.395 | 1.00 | 24.58 | . |
| ATOM | 1768 | OE1 | OE1 | . | GLN | GLN | A | A | 73 | 73 | . | 17.093 | 25.381 | -3.284 | 1.00 | 19.66 | . |
| ATOM | 1769 | NE2 | NE2 | . | GLN | GLN | A | A | 73 | 73 | . | 17.523 | 25.907 | -5.424 | 1.00 | 26.83 | . |
| ATOM | 1770 | N   | N   | . | ILE | ILE | A | A | 74 | 74 | . | 11.992 | 26.024 | -5.586 | 1.00 | 15.05 | . |
| ATOM | 1771 | CA  | CA  | . | ILE | ILE | A | A | 74 | 74 | . | 11.179 | 24.997 | -6.211 | 1.00 | 13.28 | . |
| ATOM | 1772 | C   | C   | . | ILE | ILE | A | A | 74 | 74 | . | 11.979 | 23.720 | -6.419 | 1.00 | 16.62 | . |
| ATOM | 1773 | O   | O   | . | ILE | ILE | A | A | 74 | 74 | . | 13.047 | 23.740 | -7.034 | 1.00 | 18.18 | . |
| ATOM | 1774 | CB  | CB  | . | ILE | ILE | A | A | 74 | 74 | . | 10.638 | 25.480 | -7.567 | 1.00 | 20.34 | . |
| ATOM | 1775 | CG1 | CG1 | . | ILE | ILE | A | A | 74 | 74 | . | 9.788  | 26.736 | -7.353 | 1.00 | 16.93 | . |
| ATOM | 1776 | CG2 | CG2 | . | ILE | ILE | A | A | 74 | 74 | . | 9.809  | 24.379 | -8.220 | 1.00 | 25.84 | . |
| ATOM | 1777 | CD1 | CD1 | . | ILE | ILE | A | A | 74 | 74 | . | 9.353  | 27.381 | -8.615 | 1.00 | 26.87 | . |
| ATOM | 1778 | N   | N   | . | PHE | PHE | A | A | 75 | 75 | . | 11.453 | 22.618 | -5.882 | 1.00 | 18.79 | . |
| ATOM | 1779 | CA  | CA  | . | PHE | PHE | A | A | 75 | 75 | . | 12.066 | 21.297 | -5.997 | 1.00 | 17.95 | . |
| ATOM | 1780 | C   | C   | . | PHE | PHE | A | A | 75 | 75 | . | 11.132 | 20.358 | -6.755 | 1.00 | 22.55 | . |
| ATOM | 1781 | O   | O   | . | PHE | PHE | A | A | 75 | 75 | . | 9.917  | 20.557 | -6.760 | 1.00 | 16.92 | . |
| ATOM | 1782 | CB  | CB  | . | PHE | PHE | A | A | 75 | 75 | . | 12.306 | 20.688 | -4.611 | 1.00 | 18.01 | . |
| ATOM | 1783 | CG  | CG  | . | PHE | PHE | A | A | 75 | 75 | . | 13.669 | 20.966 | -4.045 | 1.00 | 19.86 | . |
| ATOM | 1784 | CD1 | CD1 | . | PHE | PHE | A | A | 75 | 75 | . | 14.062 | 22.259 | -3.737 | 1.00 | 17.42 | . |
| ATOM | 1785 | CD2 | CD2 | . | PHE | PHE | A | A | 75 | 75 | . | 14.559 | 19.923 | -3.814 | 1.00 | 28.23 | . |
| ATOM | 1786 | CE1 | CE1 | . | PHE | PHE | A | A | 75 | 75 | . | 15.324 | 22.515 | -3.201 | 1.00 | 22.82 | . |
| ATOM | 1787 | CE2 | CE2 | . | PHE | PHE | A | A | 75 | 75 | . | 15.831 | 20.168 | -3.277 | 1.00 | 28.46 | . |
| ATOM | 1788 | CZ  | CZ  | . | PHE | PHE | A | A | 75 | 75 | . | 16.208 | 21.466 | -2.971 | 1.00 | 23.30 | . |
| ATOM | 1789 | N   | N   | . | PRO | PRO | A | A | 76 | 76 | . | 11.685 | 19.319 | -7.405 | 1.00 | 25.91 | . |
| ATOM | 1790 | CA  | CA  | . | PRO | PRO | A | A | 76 | 76 | . | 10.803 | 18.394 | -8.127 | 1.00 | 24.76 | . |
| ATOM | 1791 | C   | C   | . | PRO | PRO | A | A | 76 | 76 | . | 10.022 | 17.632 | -7.062 | 1.00 | 19.25 | . |
| ATOM | 1792 | O   | O   | . | PRO | PRO | A | A | 76 | 76 | . | 10.395 | 17.667 | -5.886 | 1.00 | 20.25 | . |
| ATOM | 1793 | CB  | CB  | . | PRO | PRO | A | A | 76 | 76 | . | 11.784 | 17.507 | -8.892 | 1.00 | 25.61 | . |
| ATOM | 1794 | CG  | CG  | . | PRO | PRO | A | A | 76 | 76 | . | 12.986 | 17.477 | -7.983 | 1.00 | 25.49 | . |
| ATOM | 1795 | CD  | CD  | . | PRO | PRO | A | A | 76 | 76 | . | 13.100 | 18.921 | -7.541 | 1.00 | 23.57 | . |
| ATOM | 1796 | N   | N   | . | ALA | ALA | A | A | 77 | 77 | . | 8.940  | 16.966 | -7.457 | 1.00 | 16.75 | . |
| ATOM | 1797 | CA  | CA  | . | ALA | ALA | A | A | 77 | 77 | . | 8.121  | 16.210 | -6.512 | 1.00 | 23.14 | . |

|      |      |     |     |   |     |     |   |   |    |    |   |        |        |         |      |       |   |
|------|------|-----|-----|---|-----|-----|---|---|----|----|---|--------|--------|---------|------|-------|---|
| ATOM | 1798 | C   | C   | . | ALA | ALA | A | A | 77 | 77 | . | 8.968  | 15.168 | -5.781  | 1.00 | 21.34 | . |
| ATOM | 1799 | O   | O   | . | ALA | ALA | A | A | 77 | 77 | . | 10.038 | 14.793 | -6.261  | 1.00 | 19.00 | . |
| ATOM | 1800 | CB  | CB  | . | ALA | ALA | A | A | 77 | 77 | . | 6.970  | 15.535 | -7.248  | 1.00 | 19.46 | . |
| ATOM | 1801 | N   | N   | . | LEU | LEU | A | A | 78 | 78 | . | 8.489  | 14.704 | -4.629  | 1.00 | 19.96 | . |
| ATOM | 1802 | CA  | CA  | . | LEU | LEU | A | A | 78 | 78 | . | 9.232  | 13.719 | -3.836  | 1.00 | 28.31 | . |
| ATOM | 1803 | C   | C   | . | LEU | LEU | A | A | 78 | 78 | . | 9.770  | 12.550 | -4.648  | 1.00 | 32.85 | . |
| ATOM | 1804 | O   | O   | . | LEU | LEU | A | A | 78 | 78 | . | 10.936 | 12.175 | -4.509  | 1.00 | 35.59 | . |
| ATOM | 1805 | CB  | CB  | . | LEU | LEU | A | A | 78 | 78 | . | 8.375  | 13.165 | -2.695  | 1.00 | 23.94 | . |
| ATOM | 1806 | CG  | CG  | . | LEU | LEU | A | A | 78 | 78 | . | 9.087  | 12.090 | -1.857  | 1.00 | 28.15 | . |
| ATOM | 1807 | CD1 | CD1 | . | LEU | LEU | A | A | 78 | 78 | . | 10.256 | 12.715 | -1.112  | 1.00 | 34.86 | . |
| ATOM | 1808 | CD2 | CD2 | . | LEU | LEU | A | A | 78 | 78 | . | 8.116  | 11.461 | -0.871  | 1.00 | 37.55 | . |
| ATOM | 1809 | N   | N   | . | ASN | ASN | A | A | 79 | 79 | . | 8.934  | 11.967 | -5.497  | 1.00 | 29.54 | . |
| ATOM | 1810 | CA  | CA  | . | ASN | ASN | A | A | 79 | 79 | . | 9.386  | 10.825 | -6.288  | 1.00 | 40.63 | . |
| ATOM | 1811 | C   | C   | . | ASN | ASN | A | A | 79 | 79 | . | 9.692  | 11.159 | -7.745  | 1.00 | 42.82 | . |
| ATOM | 1812 | O   | O   | . | ASN | ASN | A | A | 79 | 79 | . | 9.547  | 10.319 | -8.635  | 1.00 | 39.17 | . |
| ATOM | 1813 | CB  | CB  | . | ASN | ASN | A | A | 79 | 79 | . | 8.355  | 9.697  | -6.200  | 1.00 | 47.65 | . |
| ATOM | 1814 | CG  | CG  | . | ASN | ASN | A | A | 79 | 79 | . | 8.190  | 9.177  | -4.778  | 1.00 | 54.90 | . |
| ATOM | 1815 | OD1 | OD1 | . | ASN | ASN | A | A | 79 | 79 | . | 9.164  | 8.766  | -4.138  | 1.00 | 51.31 | . |
| ATOM | 1816 | ND2 | ND2 | . | ASN | ASN | A | A | 79 | 79 | . | 6.959  | 9.197  | -4.276  | 1.00 | 46.54 | . |
| ATOM | 1817 | N   | N   | . | ALA | ALA | A | A | 80 | 80 | . | 10.133 | 12.391 | -7.975  | 1.00 | 33.86 | . |
| ATOM | 1818 | CA  | CA  | . | ALA | ALA | A | A | 80 | 80 | . | 10.478 | 12.850 | -9.310  | 1.00 | 33.05 | . |
| ATOM | 1819 | C   | C   | . | ALA | ALA | A | A | 80 | 80 | . | 11.880 | 13.436 | -9.284  | 1.00 | 29.84 | . |
| ATOM | 1820 | O   | O   | . | ALA | ALA | A | A | 80 | 80 | . | 12.534 | 13.467 | -8.245  | 1.00 | 30.27 | . |
| ATOM | 1821 | CB  | CB  | . | ALA | ALA | A | A | 80 | 80 | . | 9.483  | 13.904 | -9.777  | 1.00 | 23.84 | . |
| ATOM | 1822 | N   | N   | . | LYS | LYS | A | A | 81 | 81 | . | 12.329 | 13.907 | -10.439 | 1.00 | 32.52 | . |
| ATOM | 1823 | CA  | CA  | . | LYS | LYS | A | A | 81 | 81 | . | 13.643 | 14.513 | -10.571 | 1.00 | 37.41 | . |
| ATOM | 1824 | C   | C   | . | LYS | LYS | A | A | 81 | 81 | . | 13.562 | 15.551 | -11.685 | 1.00 | 34.14 | . |
| ATOM | 1825 | O   | O   | . | LYS | LYS | A | A | 81 | 81 | . | 12.721 | 15.450 | -12.576 | 1.00 | 34.73 | . |
| ATOM | 1826 | CB  | CB  | . | LYS | LYS | A | A | 81 | 81 | . | 14.682 | 13.444 | -10.916 | 1.00 | 42.02 | . |
| ATOM | 1827 | CG  | CG  | . | LYS | LYS | A | A | 81 | 81 | . | 14.334 | 12.647 | -12.162 | 1.00 | 54.63 | . |
| ATOM | 1828 | CD  | CD  | . | LYS | LYS | A | A | 81 | 81 | . | 15.303 | 11.493 | -12.388 | 1.00 | 61.26 | . |
| ATOM | 1829 | CE  | CE  | . | LYS | LYS | A | A | 81 | 81 | . | 14.849 | 10.624 | -13.553 | 1.00 | 58.14 | . |
| ATOM | 1830 | NZ  | NZ  | . | LYS | LYS | A | A | 81 | 81 | . | 15.716 | 9.425  | -13.721 | 1.00 | 60.61 | . |
| ATOM | 1831 | N   | N   | . | CYS | CYS | A | A | 82 | 82 | . | 14.429 | 16.552 | -11.634 | 1.00 | 26.46 | . |
| ATOM | 1832 | CA  | CA  | . | CYS | CYS | A | A | 82 | 82 | . | 14.418 | 17.587 | -12.651 | 1.00 | 28.66 | . |
| ATOM | 1833 | C   | C   | . | CYS | CYS | A | A | 82 | 82 | . | 15.801 | 18.190 | -12.797 | 1.00 | 28.44 | . |
| ATOM | 1834 | O   | O   | . | CYS | CYS | A | A | 82 | 82 | . | 16.691 | 17.931 | -11.994 | 1.00 | 38.48 | . |
| ATOM | 1835 | CB  | CB  | . | CYS | CYS | A | A | 82 | 82 | . | 13.449 | 18.693 | -12.255 | 1.00 | 35.74 | . |
| ATOM | 1836 | SG  | SG  | . | CYS | CYS | A | A | 82 | 82 | . | 14.131 | 19.728 | -10.921 | 1.00 | 39.46 | . |
| ATOM | 1837 | N   | N   | . | ASN | ASN | A | A | 83 | 83 | . | 15.968 | 19.011 | -13.824 | 1.00 | 36.00 | . |
| ATOM | 1838 | CA  | CA  | . | ASN | ASN | A | A | 83 | 83 | . | 17.231 | 19.687 | -14.076 | 1.00 | 37.06 | . |
| ATOM | 1839 | C   | C   | . | ASN | ASN | A | A | 83 | 83 | . | 17.028 | 21.187 | -13.904 | 1.00 | 40.07 | . |
| ATOM | 1840 | O   | O   | . | ASN | ASN | A | A | 83 | 83 | . | 16.051 | 21.749 | -14.402 | 1.00 | 35.61 | . |
| ATOM | 1841 | CB  | CB  | . | ASN | ASN | A | A | 83 | 83 | . | 17.704 | 19.394 | -15.498 | 1.00 | 44.70 | . |
| ATOM | 1842 | CG  | CG  | . | ASN | ASN | A | A | 83 | 83 | . | 18.115 | 17.950 | -15.686 | 1.00 | 44.20 | . |
| ATOM | 1843 | OD1 | OD1 | . | ASN | ASN | A | A | 83 | 83 | . | 17.957 | 17.386 | -16.765 | 1.00 | 48.26 | . |
| ATOM | 1844 | ND2 | ND2 | . | ASN | ASN | A | A | 83 | 83 | . | 18.658 | 17.348 | -14.637 | 1.00 | 0.00  | . |
| ATOM | 1845 | N   | N   | . | ARG | ARG | A | A | 84 | 84 | . | 17.940 | 21.835 | -13.189 | 1.00 | 36.76 | . |
| ATOM | 1846 | CA  | CA  | . | ARG | ARG | A | A | 84 | 84 | . | 17.839 | 23.272 | -12.986 | 1.00 | 36.21 | . |
| ATOM | 1847 | C   | C   | . | ARG | ARG | A | A | 84 | 84 | . | 17.563 | 23.901 | -14.344 | 1.00 | 40.03 | . |
| ATOM | 1848 | O   | O   | . | ARG | ARG | A | A | 84 | 84 | . | 18.228 | 23.579 | -15.329 | 1.00 | 42.96 | . |
| ATOM | 1849 | CB  | CB  | . | ARG | ARG | A | A | 84 | 84 | . | 19.144 | 23.825 | -12.400 | 1.00 | 41.12 | . |
| ATOM | 1850 | CG  | CG  | . | ARG | ARG | A | A | 84 | 84 | . | 20.238 | 22.782 | -12.202 | 1.00 | 60.84 | . |
| ATOM | 1851 | CD  | CD  | . | ARG | ARG | A | A | 84 | 84 | . | 20.753 | 22.251 | -13.541 | 1.00 | 69.11 | . |
| ATOM | 1852 | NE  | NE  | . | ARG | ARG | A | A | 84 | 84 | . | 21.477 | 20.988 | -13.400 | 1.00 | 63.86 | . |
| ATOM | 1853 | CZ  | CZ  | . | ARG | ARG | A | A | 84 | 84 | . | 21.979 | 20.299 | -14.420 | 1.00 | 65.32 | . |
| ATOM | 1854 | NH1 | NH1 | . | ARG | ARG | A | A | 84 | 84 | . | 21.840 | 20.752 | -15.661 | 1.00 | 55.45 | . |

|      |      |     |     |   |     |     |   |   |    |    |   |        |        |         |      |       |   |
|------|------|-----|-----|---|-----|-----|---|---|----|----|---|--------|--------|---------|------|-------|---|
| ATOM | 1855 | NH2 | NH2 | . | ARG | ARG | A | A | 84 | 84 | . | 22.611 | 19.152 | -14.203 | 1.00 | 64.96 | . |
| ATOM | 1856 | N   | N   | . | GLY | GLY | A | A | 85 | 85 | . | 16.573 | 24.784 | -14.405 | 1.00 | 31.47 | . |
| ATOM | 1857 | CA  | CA  | . | GLY | GLY | A | A | 85 | 85 | . | 16.245 | 25.415 | -15.668 | 1.00 | 35.95 | . |
| ATOM | 1858 | C   | C   | . | GLY | GLY | A | A | 85 | 85 | . | 15.067 | 24.751 | -16.359 | 1.00 | 38.44 | . |
| ATOM | 1859 | O   | O   | . | GLY | GLY | A | A | 85 | 85 | . | 14.492 | 25.311 | -17.295 | 1.00 | 40.28 | . |
| ATOM | 1860 | N   | N   | . | ASP | ASP | A | A | 86 | 86 | . | 14.704 | 23.554 | -15.908 | 1.00 | 32.62 | . |
| ATOM | 1861 | CA  | CA  | . | ASP | ASP | A | A | 86 | 86 | . | 13.573 | 22.841 | -16.494 | 1.00 | 33.72 | . |
| ATOM | 1862 | C   | C   | . | ASP | ASP | A | A | 86 | 86 | . | 12.277 | 23.584 | -16.207 | 1.00 | 34.44 | . |
| ATOM | 1863 | O   | O   | . | ASP | ASP | A | A | 86 | 86 | . | 12.047 | 24.039 | -15.091 | 1.00 | 32.61 | . |
| ATOM | 1864 | CB  | CB  | . | ASP | ASP | A | A | 86 | 86 | . | 13.465 | 21.419 | -15.931 | 1.00 | 31.68 | . |
| ATOM | 1865 | CG  | CG  | . | ASP | ASP | A | A | 86 | 86 | . | 14.491 | 20.478 | -16.523 | 1.00 | 38.31 | . |
| ATOM | 1866 | OD1 | OD1 | . | ASP | ASP | A | A | 86 | 86 | . | 15.213 | 20.901 | -17.451 | 1.00 | 28.40 | . |
| ATOM | 1867 | OD2 | OD2 | . | ASP | ASP | A | A | 86 | 86 | . | 14.568 | 19.316 | -16.067 | 1.00 | 30.96 | . |
| ATOM | 1868 | N   | N   | . | ALA | ALA | A | A | 87 | 87 | . | 11.435 | 23.709 | -17.224 | 1.00 | 32.83 | . |
| ATOM | 1869 | CA  | CA  | . | ALA | ALA | A | A | 87 | 87 | . | 10.160 | 24.378 | -17.060 | 1.00 | 33.11 | . |
| ATOM | 1870 | C   | C   | . | ALA | ALA | A | A | 87 | 87 | . | 9.266  | 23.465 | -16.245 | 1.00 | 27.79 | . |
| ATOM | 1871 | O   | O   | . | ALA | ALA | A | A | 87 | 87 | . | 9.398  | 22.244 | -16.299 | 1.00 | 25.57 | . |
| ATOM | 1872 | CB  | CB  | . | ALA | ALA | A | A | 87 | 87 | . | 9.530  | 24.648 | -18.420 | 1.00 | 34.78 | . |
| ATOM | 1873 | N   | N   | . | ILE | ILE | A | A | 88 | 88 | . | 8.371  | 24.055 | -15.465 | 1.00 | 33.57 | . |
| ATOM | 1874 | CA  | CA  | . | ILE | ILE | A | A | 88 | 88 | . | 7.445  | 23.262 | -14.674 | 1.00 | 29.69 | . |
| ATOM | 1875 | C   | C   | . | ILE | ILE | A | A | 88 | 88 | . | 6.117  | 23.309 | -15.408 | 1.00 | 34.02 | . |
| ATOM | 1876 | O   | O   | . | ILE | ILE | A | A | 88 | 88 | . | 5.616  | 24.388 | -15.733 | 1.00 | 27.55 | . |
| ATOM | 1877 | CB  | CB  | . | ILE | ILE | A | A | 88 | 88 | . | 7.271  | 23.831 | -13.260 | 1.00 | 30.67 | . |
| ATOM | 1878 | CG1 | CG1 | . | ILE | ILE | A | A | 88 | 88 | . | 8.607  | 23.756 | -12.514 | 1.00 | 34.91 | . |
| ATOM | 1879 | CG2 | CG2 | . | ILE | ILE | A | A | 88 | 88 | . | 6.190  | 23.047 | -12.510 | 1.00 | 23.27 | . |
| ATOM | 1880 | CD1 | CD1 | . | ILE | ILE | A | A | 88 | 88 | . | 8.595  | 24.460 | -11.196 | 1.00 | 38.11 | . |
| ATOM | 1881 | N   | N   | . | LYS | LYS | A | A | 89 | 89 | . | 5.558  | 22.137 | -15.684 | 1.00 | 28.62 | . |
| ATOM | 1882 | CA  | CA  | . | LYS | LYS | A | A | 89 | 89 | . | 4.295  | 22.063 | -16.395 | 1.00 | 32.16 | . |
| ATOM | 1883 | C   | C   | . | LYS | LYS | A | A | 89 | 89 | . | 3.146  | 22.147 | -15.403 | 1.00 | 29.68 | . |
| ATOM | 1884 | O   | O   | . | LYS | LYS | A | A | 89 | 89 | . | 3.270  | 21.673 | -14.274 | 1.00 | 23.85 | . |
| ATOM | 1885 | CB  | CB  | . | LYS | LYS | A | A | 89 | 89 | . | 4.216  | 20.748 | -17.183 | 1.00 | 37.12 | . |
| ATOM | 1886 | CG  | CG  | . | LYS | LYS | A | A | 89 | 89 | . | 5.308  | 20.570 | -18.252 | 1.00 | 37.96 | . |
| ATOM | 1887 | CD  | CD  | . | LYS | LYS | A | A | 89 | 89 | . | 6.674  | 20.298 | -17.625 | 1.00 | 45.80 | . |
| ATOM | 1888 | CE  | CE  | . | LYS | LYS | A | A | 89 | 89 | . | 7.767  | 20.151 | -18.678 | 1.00 | 55.66 | . |
| ATOM | 1889 | NZ  | NZ  | . | LYS | LYS | A | A | 89 | 89 | . | 9.095  | 19.841 | -18.070 | 1.00 | 46.12 | . |
| ATOM | 1890 | N   | N   | . | CYS | CYS | A | A | 90 | 90 | . | 2.033  | 22.754 | -15.816 | 1.00 | 26.67 | . |
| ATOM | 1891 | CA  | CA  | . | CYS | CYS | A | A | 90 | 90 | . | 0.869  | 22.867 | -14.939 | 1.00 | 23.14 | . |
| ATOM | 1892 | C   | C   | . | CYS | CYS | A | A | 90 | 90 | . | 0.326  | 21.470 | -14.695 | 1.00 | 22.14 | . |
| ATOM | 1893 | O   | O   | . | CYS | CYS | A | A | 90 | 90 | . | 0.307  | 20.637 | -15.599 | 1.00 | 26.09 | . |
| ATOM | 1894 | CB  | CB  | . | CYS | CYS | A | A | 90 | 90 | . | -0.208 | 23.775 | -15.565 | 1.00 | 20.81 | . |
| ATOM | 1895 | SG  | SG  | . | CYS | CYS | A | A | 90 | 90 | . | 0.459  | 25.423 | -15.967 | 1.00 | 32.21 | . |
| ATOM | 1896 | N   | N   | . | GLY | GLY | A | A | 91 | 91 | . | -0.101 | 21.212 | -13.466 | 1.00 | 19.38 | . |
| ATOM | 1897 | CA  | CA  | . | GLY | GLY | A | A | 91 | 91 | . | -0.617 | 19.906 | -13.128 | 1.00 | 18.94 | . |
| ATOM | 1898 | C   | C   | . | GLY | GLY | A | A | 91 | 91 | . | 0.451  | 19.055 | -12.462 | 1.00 | 21.25 | . |
| ATOM | 1899 | O   | O   | . | GLY | GLY | A | A | 91 | 91 | . | 0.139  | 18.089 | -11.768 | 1.00 | 24.01 | . |
| ATOM | 1900 | N   | N   | . | ASP | ASP | A | A | 92 | 92 | . | 1.716  | 19.397 | -12.679 | 1.00 | 23.40 | . |
| ATOM | 1901 | CA  | CA  | . | ASP | ASP | A | A | 92 | 92 | . | 2.805  | 18.647 | -12.057 | 1.00 | 27.21 | . |
| ATOM | 1902 | C   | C   | . | ASP | ASP | A | A | 92 | 92 | . | 2.929  | 19.006 | -10.581 | 1.00 | 24.19 | . |
| ATOM | 1903 | O   | O   | . | ASP | ASP | A | A | 92 | 92 | . | 2.538  | 20.096 | -10.164 | 1.00 | 19.26 | . |
| ATOM | 1904 | CB  | CB  | . | ASP | ASP | A | A | 92 | 92 | . | 4.135  | 18.940 | -12.763 | 1.00 | 29.22 | . |
| ATOM | 1905 | CG  | CG  | . | ASP | ASP | A | A | 92 | 92 | . | 4.383  | 18.023 | -13.950 | 1.00 | 37.68 | . |
| ATOM | 1906 | OD1 | OD1 | . | ASP | ASP | A | A | 92 | 92 | . | 5.420  | 18.201 | -14.621 | 1.00 | 46.45 | . |
| ATOM | 1907 | OD2 | OD2 | . | ASP | ASP | A | A | 92 | 92 | . | 3.550  | 17.125 | -14.207 | 1.00 | 36.00 | . |
| ATOM | 1908 | N   | N   | . | LYS | LYS | A | A | 93 | 93 | . | 3.458  | 18.077 | -9.792  | 1.00 | 19.99 | . |
| ATOM | 1909 | CA  | CA  | . | LYS | LYS | A | A | 93 | 93 | . | 3.656  | 18.309 | -8.371  | 1.00 | 20.83 | . |
| ATOM | 1910 | C   | C   | . | LYS | LYS | A | A | 93 | 93 | . | 5.057  | 18.863 | -8.147  | 1.00 | 23.59 | . |
| ATOM | 1911 | O   | O   | . | LYS | LYS | A | A | 93 | 93 | . | 5.973  | 18.596 | -8.929  | 1.00 | 16.09 | . |

|      |      |     |     |   |     |     |   |   |    |    |   |        |        |        |      |       |   |
|------|------|-----|-----|---|-----|-----|---|---|----|----|---|--------|--------|--------|------|-------|---|
| ATOM | 1912 | CB  | CB  | . | LYS | LYS | A | A | 93 | 93 | . | 3.483  | 17.006 | -7.578 | 1.00 | 21.63 | . |
| ATOM | 1913 | CG  | CG  | . | LYS | LYS | A | A | 93 | 93 | . | 2.034  | 16.549 | -7.484 | 1.00 | 30.33 | . |
| ATOM | 1914 | CD  | CD  | . | LYS | LYS | A | A | 93 | 93 | . | 1.861  | 15.336 | -6.596 | 1.00 | 34.71 | . |
| ATOM | 1915 | CE  | CE  | . | LYS | LYS | A | A | 93 | 93 | . | 2.412  | 14.082 | -7.244 | 1.00 | 38.03 | . |
| ATOM | 1916 | NZ  | NZ  | . | LYS | LYS | A | A | 93 | 93 | . | 2.061  | 12.880 | -6.440 | 1.00 | 44.92 | . |
| ATOM | 1917 | N   | N   | . | ILE | ILE | A | A | 94 | 94 | . | 5.205  | 19.670 | -7.103 | 1.00 | 18.64 | . |
| ATOM | 1918 | CA  | CA  | . | ILE | ILE | A | A | 94 | 94 | . | 6.497  | 20.235 | -6.744 | 1.00 | 17.58 | . |
| ATOM | 1919 | C   | C   | . | ILE | ILE | A | A | 94 | 94 | . | 6.592  | 20.227 | -5.234 | 1.00 | 14.82 | . |
| ATOM | 1920 | O   | O   | . | ILE | ILE | A | A | 94 | 94 | . | 5.646  | 19.861 | -4.545 | 1.00 | 16.80 | . |
| ATOM | 1921 | CB  | CB  | . | ILE | ILE | A | A | 94 | 94 | . | 6.664  | 21.704 | -7.191 | 1.00 | 15.70 | . |
| ATOM | 1922 | CG1 | CG1 | . | ILE | ILE | A | A | 94 | 94 | . | 5.602  | 22.588 | -6.519 | 1.00 | 19.95 | . |
| ATOM | 1923 | CG2 | CG2 | . | ILE | ILE | A | A | 94 | 94 | . | 6.596  | 21.797 | -8.696 | 1.00 | 21.39 | . |
| ATOM | 1924 | CD1 | CD1 | . | ILE | ILE | A | A | 94 | 94 | . | 5.786  | 24.090 | -6.767 | 1.00 | 22.79 | . |
| ATOM | 1925 | N   | N   | . | ARG | ARG | A | A | 95 | 95 | . | 7.759  | 20.611 | -4.739 | 1.00 | 17.95 | . |
| ATOM | 1926 | CA  | CA  | . | ARG | ARG | A | A | 95 | 95 | . | 8.006  | 20.746 | -3.320 | 1.00 | 15.08 | . |
| ATOM | 1927 | C   | C   | . | ARG | ARG | A | A | 95 | 95 | . | 8.598  | 22.146 | -3.202 | 1.00 | 13.78 | . |
| ATOM | 1928 | O   | O   | . | ARG | ARG | A | A | 95 | 95 | . | 9.250  | 22.626 | -4.131 | 1.00 | 17.71 | . |
| ATOM | 1929 | CB  | CB  | . | ARG | ARG | A | A | 95 | 95 | . | 9.002  | 19.690 | -2.831 | 1.00 | 16.03 | . |
| ATOM | 1930 | CG  | CG  | . | ARG | ARG | A | A | 95 | 95 | . | 8.366  | 18.332 | -2.511 | 1.00 | 17.90 | . |
| ATOM | 1931 | CD  | CD  | . | ARG | ARG | A | A | 95 | 95 | . | 9.407  | 17.353 | -1.983 | 1.00 | 18.32 | . |
| ATOM | 1932 | NE  | NE  | . | ARG | ARG | A | A | 95 | 95 | . | 10.409 | 17.079 | -3.004 | 1.00 | 18.88 | . |
| ATOM | 1933 | CZ  | CZ  | . | ARG | ARG | A | A | 95 | 95 | . | 11.615 | 16.572 | -2.769 | 1.00 | 23.43 | . |
| ATOM | 1934 | NH1 | NH1 | . | ARG | ARG | A | A | 95 | 95 | . | 11.985 | 16.274 | -1.532 | 1.00 | 19.98 | . |
| ATOM | 1935 | NH2 | NH2 | . | ARG | ARG | A | A | 95 | 95 | . | 12.459 | 16.381 | -3.778 | 1.00 | 14.71 | . |
| ATOM | 1936 | N   | N   | . | LEU | LEU | A | A | 96 | 96 | . | 8.355  | 22.815 | -2.081 | 1.00 | 15.59 | . |
| ATOM | 1937 | CA  | CA  | . | LEU | LEU | A | A | 96 | 96 | . | 8.876  | 24.158 | -1.891 | 1.00 | 15.09 | . |
| ATOM | 1938 | C   | C   | . | LEU | LEU | A | A | 96 | 96 | . | 9.756  | 24.196 | -0.650 | 1.00 | 12.27 | . |
| ATOM | 1939 | O   | O   | . | LEU | LEU | A | A | 96 | 96 | . | 9.286  | 23.989 | 0.469  | 1.00 | 13.79 | . |
| ATOM | 1940 | CB  | CB  | . | LEU | LEU | A | A | 96 | 96 | . | 7.727  | 25.167 | -1.753 | 1.00 | 20.55 | . |
| ATOM | 1941 | CG  | CG  | . | LEU | LEU | A | A | 96 | 96 | . | 6.961  | 25.509 | -3.037 | 1.00 | 25.97 | . |
| ATOM | 1942 | CD1 | CD1 | . | LEU | LEU | A | A | 96 | 96 | . | 5.777  | 26.423 | -2.716 | 1.00 | 23.11 | . |
| ATOM | 1943 | CD2 | CD2 | . | LEU | LEU | A | A | 96 | 96 | . | 7.908  | 26.199 | -4.025 | 1.00 | 18.62 | . |
| ATOM | 1944 | N   | N   | . | LYS | LYS | A | A | 97 | 97 | . | 11.038 | 24.461 | -0.867 | 1.00 | 15.43 | . |
| ATOM | 1945 | CA  | CA  | . | LYS | LYS | A | A | 97 | 97 | . | 12.008 | 24.523 | 0.218  | 1.00 | 13.62 | . |
| ATOM | 1946 | C   | C   | . | LYS | LYS | A | A | 97 | 97 | . | 12.199 | 25.938 | 0.767  | 1.00 | 13.33 | . |
| ATOM | 1947 | O   | O   | . | LYS | LYS | A | A | 97 | 97 | . | 12.454 | 26.876 | 0.008  | 1.00 | 16.33 | . |
| ATOM | 1948 | CB  | CB  | . | LYS | LYS | A | A | 97 | 97 | . | 13.350 | 23.989 | -0.282 | 1.00 | 13.69 | . |
| ATOM | 1949 | CG  | CG  | . | LYS | LYS | A | A | 97 | 97 | . | 14.394 | 23.817 | 0.816  | 1.00 | 20.49 | . |
| ATOM | 1950 | CD  | CD  | . | LYS | LYS | A | A | 97 | 97 | . | 15.694 | 23.311 | 0.231  | 1.00 | 23.55 | . |
| ATOM | 1951 | CE  | CE  | . | LYS | LYS | A | A | 97 | 97 | . | 16.711 | 23.006 | 1.311  | 1.00 | 33.61 | . |
| ATOM | 1952 | NZ  | NZ  | . | LYS | LYS | A | A | 97 | 97 | . | 17.974 | 22.541 | 0.698  | 1.00 | 29.81 | . |
| ATOM | 1953 | N   | N   | . | HIS | HIS | A | A | 98 | 98 | . | 12.051 | 26.097 | 2.076  | 1.00 | 10.64 | . |
| ATOM | 1954 | CA  | CA  | . | HIS | HIS | A | A | 98 | 98 | . | 12.258 | 27.396 | 2.698  | 1.00 | 15.52 | . |
| ATOM | 1955 | C   | C   | . | HIS | HIS | A | A | 98 | 98 | . | 13.775 | 27.515 | 2.835  | 1.00 | 21.16 | . |
| ATOM | 1956 | O   | O   | . | HIS | HIS | A | A | 98 | 98 | . | 14.398 | 26.773 | 3.601  | 1.00 | 18.88 | . |
| ATOM | 1957 | CB  | CB  | . | HIS | HIS | A | A | 98 | 98 | . | 11.575 | 27.451 | 4.060  | 1.00 | 14.29 | . |
| ATOM | 1958 | CG  | CG  | . | HIS | HIS | A | A | 98 | 98 | . | 11.700 | 28.777 | 4.735  | 1.00 | 22.33 | . |
| ATOM | 1959 | ND1 | ND1 | . | HIS | HIS | A | A | 98 | 98 | . | 12.337 | 28.937 | 5.947  | 1.00 | 17.69 | . |
| ATOM | 1960 | CD2 | CD2 | . | HIS | HIS | A | A | 98 | 98 | . | 11.266 | 30.009 | 4.369  | 1.00 | 15.86 | . |
| ATOM | 1961 | CE1 | CE1 | . | HIS | HIS | A | A | 98 | 98 | . | 12.285 | 30.211 | 6.302  | 1.00 | 24.14 | . |
| ATOM | 1962 | NE2 | NE2 | . | HIS | HIS | A | A | 98 | 98 | . | 11.642 | 30.882 | 5.361  | 1.00 | 18.82 | . |
| ATOM | 1963 | N   | N   | . | LEU | LEU | A | A | 99 | 99 | . | 14.361 | 28.440 | 2.082  | 1.00 | 18.40 | . |
| ATOM | 1964 | CA  | CA  | . | LEU | LEU | A | A | 99 | 99 | . | 15.809 | 28.606 | 2.052  | 1.00 | 22.07 | . |
| ATOM | 1965 | C   | C   | . | LEU | LEU | A | A | 99 | 99 | . | 16.555 | 28.784 | 3.359  | 1.00 | 27.89 | . |
| ATOM | 1966 | O   | O   | . | LEU | LEU | A | A | 99 | 99 | . | 17.542 | 28.093 | 3.597  | 1.00 | 28.20 | . |
| ATOM | 1967 | CB  | CB  | . | LEU | LEU | A | A | 99 | 99 | . | 16.194 | 29.750 | 1.110  | 1.00 | 27.86 | . |
| ATOM | 1968 | CG  | CG  | . | LEU | LEU | A | A | 99 | 99 | . | 16.225 | 29.443 | -0.389 | 1.00 | 37.42 | . |

|      |      |     |     |       |     |   |   |     |     |          |        |        |      |       |   |
|------|------|-----|-----|-------|-----|---|---|-----|-----|----------|--------|--------|------|-------|---|
| ATOM | 1969 | CD1 | CD1 | . LEU | LEU | A | A | 99  | 99  | . 16.891 | 30.601 | -1.115 | 1.00 | 39.90 | . |
| ATOM | 1970 | CD2 | CD2 | . LEU | LEU | A | A | 99  | 99  | . 16.996 | 28.153 | -0.647 | 1.00 | 39.14 | . |
| ATOM | 1971 | N   | N   | . THR | THR | A | A | 100 | 100 | . 16.093 | 29.687 | 4.212  | 1.00 | 24.68 | . |
| ATOM | 1972 | CA  | CA  | . THR | THR | A | A | 100 | 100 | . 16.798 | 29.937 | 5.461  | 1.00 | 33.21 | . |
| ATOM | 1973 | C   | C   | . THR | THR | A | A | 100 | 100 | . 16.722 | 28.850 | 6.528  | 1.00 | 36.80 | . |
| ATOM | 1974 | O   | O   | . THR | THR | A | A | 100 | 100 | . 17.573 | 28.815 | 7.416  | 1.00 | 36.81 | . |
| ATOM | 1975 | CB  | CB  | . THR | THR | A | A | 100 | 100 | . 16.356 | 31.272 | 6.087  | 1.00 | 27.30 | . |
| ATOM | 1976 | OG1 | OG1 | . THR | THR | A | A | 100 | 100 | . 14.966 | 31.212 | 6.413  | 1.00 | 22.45 | . |
| ATOM | 1977 | CG2 | CG2 | . THR | THR | A | A | 100 | 100 | . 16.590 | 32.416 | 5.103  | 1.00 | 17.20 | . |
| ATOM | 1978 | N   | N   | . THR | THR | A | A | 101 | 101 | . 15.727 | 27.966 | 6.463  | 1.00 | 26.74 | . |
| ATOM | 1979 | CA  | CA  | . THR | THR | A | A | 101 | 101 | . 15.636 | 26.910 | 7.472  | 1.00 | 24.64 | . |
| ATOM | 1980 | C   | C   | . THR | THR | A | A | 101 | 101 | . 15.772 | 25.507 | 6.895  | 1.00 | 26.22 | . |
| ATOM | 1981 | O   | O   | . THR | THR | A | A | 101 | 101 | . 15.820 | 24.530 | 7.638  | 1.00 | 27.05 | . |
| ATOM | 1982 | CB  | CB  | . THR | THR | A | A | 101 | 101 | . 14.323 | 26.990 | 8.266  | 1.00 | 23.10 | . |
| ATOM | 1983 | OG1 | OG1 | . THR | THR | A | A | 101 | 101 | . 13.211 | 26.742 | 7.393  | 1.00 | 17.86 | . |
| ATOM | 1984 | CG2 | CG2 | . THR | THR | A | A | 101 | 101 | . 14.182 | 28.365 | 8.907  | 1.00 | 25.16 | . |
| ATOM | 1985 | N   | N   | . GLY | GLY | A | A | 102 | 102 | . 15.829 | 25.414 | 5.571  | 1.00 | 24.79 | . |
| ATOM | 1986 | CA  | CA  | . GLY | GLY | A | A | 102 | 102 | . 15.984 | 24.126 | 4.920  | 1.00 | 32.71 | . |
| ATOM | 1987 | C   | C   | . GLY | GLY | A | A | 102 | 102 | . 14.791 | 23.188 | 4.978  | 1.00 | 30.03 | . |
| ATOM | 1988 | O   | O   | . GLY | GLY | A | A | 102 | 102 | . 14.891 | 22.032 | 4.561  | 1.00 | 2.31  | . |
| ATOM | 1989 | N   | N   | . THR | THR | A | A | 103 | 103 | . 13.672 | 23.684 | 5.494  | 1.00 | 17.98 | . |
| ATOM | 1990 | CA  | CA  | . THR | THR | A | A | 103 | 103 | . 12.443 | 22.912 | 5.613  | 1.00 | 19.89 | . |
| ATOM | 1991 | C   | C   | . THR | THR | A | A | 103 | 103 | . 11.633 | 22.945 | 4.304  | 1.00 | 19.98 | . |
| ATOM | 1992 | O   | O   | . THR | THR | A | A | 103 | 103 | . 12.005 | 23.638 | 3.352  | 1.00 | 15.58 | . |
| ATOM | 1993 | CB  | CB  | . THR | THR | A | A | 103 | 103 | . 11.564 | 23.487 | 6.727  | 1.00 | 18.62 | . |
| ATOM | 1994 | OG1 | OG1 | . THR | THR | A | A | 103 | 103 | . 11.433 | 24.896 | 6.525  | 1.00 | 23.14 | . |
| ATOM | 1995 | CG2 | CG2 | . THR | THR | A | A | 103 | 103 | . 12.175 | 23.230 | 8.103  | 1.00 | 22.72 | . |
| ATOM | 1996 | N   | N   | . PHE | PHE | A | A | 104 | 104 | . 10.527 | 22.202 | 4.269  | 1.00 | 17.92 | . |
| ATOM | 1997 | CA  | CA  | . PHE | PHE | A | A | 104 | 104 | . 9.660  | 22.162 | 3.091  | 1.00 | 18.35 | . |
| ATOM | 1998 | C   | C   | . PHE | PHE | A | A | 104 | 104 | . 8.216  | 22.527 | 3.435  | 1.00 | 18.27 | . |
| ATOM | 1999 | O   | O   | . PHE | PHE | A | A | 104 | 104 | . 7.729  | 22.209 | 4.521  | 1.00 | 23.05 | . |
| ATOM | 2000 | CB  | CB  | . PHE | PHE | A | A | 104 | 104 | . 9.677  | 20.766 | 2.441  | 1.00 | 22.41 | . |
| ATOM | 2001 | CG  | CG  | . PHE | PHE | A | A | 104 | 104 | . 10.881 | 20.508 | 1.571  | 1.00 | 21.72 | . |
| ATOM | 2002 | CD1 | CD1 | . PHE | PHE | A | A | 104 | 104 | . 12.033 | 19.938 | 2.100  | 1.00 | 18.02 | . |
| ATOM | 2003 | CD2 | CD2 | . PHE | PHE | A | A | 104 | 104 | . 10.862 | 20.853 | 0.220  | 1.00 | 15.54 | . |
| ATOM | 2004 | CE1 | CE1 | . PHE | PHE | A | A | 104 | 104 | . 13.153 | 19.714 | 1.301  | 1.00 | 15.30 | . |
| ATOM | 2005 | CE2 | CE2 | . PHE | PHE | A | A | 104 | 104 | . 11.972 | 20.635 | -0.586 | 1.00 | 13.76 | . |
| ATOM | 2006 | CZ  | CZ  | . PHE | PHE | A | A | 104 | 104 | . 13.125 | 20.061 | -0.043 | 1.00 | 20.90 | . |
| ATOM | 2007 | N   | N   | . LEU | LEU | A | A | 105 | 105 | . 7.531  | 23.203 | 2.514  | 1.00 | 19.81 | . |
| ATOM | 2008 | CA  | CA  | . LEU | LEU | A | A | 105 | 105 | . 6.138  | 23.563 | 2.738  | 1.00 | 12.06 | . |
| ATOM | 2009 | C   | C   | . LEU | LEU | A | A | 105 | 105 | . 5.438  | 22.218 | 2.927  | 1.00 | 17.67 | . |
| ATOM | 2010 | O   | O   | . LEU | LEU | A | A | 105 | 105 | . 5.489  | 21.349 | 2.049  | 1.00 | 19.96 | . |
| ATOM | 2011 | CB  | CB  | . LEU | LEU | A | A | 105 | 105 | . 5.577  | 24.275 | 1.516  | 1.00 | 16.62 | . |
| ATOM | 2012 | CG  | CG  | . LEU | LEU | A | A | 105 | 105 | . 4.212  | 24.914 | 1.717  | 1.00 | 15.69 | . |
| ATOM | 2013 | CD1 | CD1 | . LEU | LEU | A | A | 105 | 105 | . 4.312  | 26.011 | 2.790  | 1.00 | 15.71 | . |
| ATOM | 2014 | CD2 | CD2 | . LEU | LEU | A | A | 105 | 105 | . 3.731  | 25.482 | 0.393  | 1.00 | 13.78 | . |
| ATOM | 2015 | N   | N   | . HIS | HIS | A | A | 106 | 106 | . 4.760  | 22.064 | 4.053  | 1.00 | 17.70 | . |
| ATOM | 2016 | CA  | CA  | . HIS | HIS | A | A | 106 | 106 | . 4.142  | 20.790 | 4.398  | 1.00 | 24.95 | . |
| ATOM | 2017 | C   | C   | . HIS | HIS | A | A | 106 | 106 | . 2.703  | 20.897 | 4.873  | 1.00 | 22.73 | . |
| ATOM | 2018 | O   | O   | . HIS | HIS | A | A | 106 | 106 | . 2.281  | 21.926 | 5.403  | 1.00 | 22.46 | . |
| ATOM | 2019 | CB  | CB  | . HIS | HIS | A | A | 106 | 106 | . 4.980  | 20.163 | 5.517  | 1.00 | 20.61 | . |
| ATOM | 2020 | CG  | CG  | . HIS | HIS | A | A | 106 | 106 | . 4.663  | 18.731 | 5.808  | 1.00 | 20.55 | . |
| ATOM | 2021 | ND1 | ND1 | . HIS | HIS | A | A | 106 | 106 | . 5.308  | 17.686 | 5.179  | 1.00 | 22.75 | . |
| ATOM | 2022 | CD2 | CD2 | . HIS | HIS | A | A | 106 | 106 | . 3.828  | 18.168 | 6.714  | 1.00 | 29.16 | . |
| ATOM | 2023 | CE1 | CE1 | . HIS | HIS | A | A | 106 | 106 | . 4.889  | 16.542 | 5.692  | 1.00 | 23.47 | . |
| ATOM | 2024 | NE2 | NE2 | . HIS | HIS | A | A | 106 | 106 | . 3.992  | 16.806 | 6.625  | 1.00 | 22.42 | . |
| ATOM | 2025 | N   | N   | . SER | SER | A | A | 107 | 107 | . 1.942  | 19.829 | 4.660  | 1.00 | 23.14 | . |

|      |      |     |     |   |     |     |   |   |     |     |   |        |        |        |      |       |   |
|------|------|-----|-----|---|-----|-----|---|---|-----|-----|---|--------|--------|--------|------|-------|---|
| ATOM | 2026 | CA  | CA  | . | SER | SER | A | A | 107 | 107 | . | 0.577  | 19.790 | 5.151  | 1.00 | 21.91 | . |
| ATOM | 2027 | C   | C   | . | SER | SER | A | A | 107 | 107 | . | 0.251  | 18.388 | 5.633  | 1.00 | 27.58 | . |
| ATOM | 2028 | O   | O   | . | SER | SER | A | A | 107 | 107 | . | 0.973  | 17.428 | 5.347  | 1.00 | 20.45 | . |
| ATOM | 2029 | CB  | CB  | . | SER | SER | A | A | 107 | 107 | . | -0.431 | 20.235 | 4.105  | 1.00 | 21.58 | . |
| ATOM | 2030 | OG  | OG  | . | SER | SER | A | A | 107 | 107 | . | -1.569 | 20.755 | 4.782  | 1.00 | 20.62 | . |
| ATOM | 2031 | N   | N   | . | HIS | HIS | A | A | 108 | 108 | . | -0.845 | 18.276 | 6.366  | 1.00 | 31.87 | . |
| ATOM | 2032 | CA  | CA  | . | HIS | HIS | A | A | 108 | 108 | . | -1.229 | 17.006 | 6.952  | 1.00 | 33.03 | . |
| ATOM | 2033 | C   | C   | . | HIS | HIS | A | A | 108 | 108 | . | -2.559 | 17.152 | 7.669  | 1.00 | 33.58 | . |
| ATOM | 2034 | O   | O   | . | HIS | HIS | A | A | 108 | 108 | . | -3.193 | 18.205 | 7.603  | 1.00 | 29.61 | . |
| ATOM | 2035 | CB  | CB  | . | HIS | HIS | A | A | 108 | 108 | . | -0.138 | 16.579 | 7.932  | 1.00 | 30.72 | . |
| ATOM | 2036 | CG  | CG  | . | HIS | HIS | A | A | 108 | 108 | . | 0.470  | 17.723 | 8.686  | 1.00 | 28.32 | . |
| ATOM | 2037 | ND1 | ND1 | . | HIS | HIS | A | A | 108 | 108 | . | 1.662  | 17.615 | 9.368  | 1.00 | 27.84 | . |
| ATOM | 2038 | CD2 | CD2 | . | HIS | HIS | A | A | 108 | 108 | . | 0.050  | 18.999 | 8.864  | 1.00 | 29.18 | . |
| ATOM | 2039 | CE1 | CE1 | . | HIS | HIS | A | A | 108 | 108 | . | 1.950  | 18.775 | 9.932  | 1.00 | 32.72 | . |
| ATOM | 2040 | NE2 | NE2 | . | HIS | HIS | A | A | 108 | 108 | . | 0.988  | 19.632 | 9.641  | 1.00 | 22.60 | . |
| ATOM | 2041 | N   | N   | . | HIS | HIS | A | A | 109 | 109 | . | -2.973 | 16.094 | 8.360  | 1.00 | 39.24 | . |
| ATOM | 2042 | CA  | CA  | . | HIS | HIS | A | A | 109 | 109 | . | -4.242 | 16.103 | 9.068  | 1.00 | 43.99 | . |
| ATOM | 2043 | C   | C   | . | HIS | HIS | A | A | 109 | 109 | . | -4.240 | 16.710 | 10.467 | 1.00 | 41.96 | . |
| ATOM | 2044 | O   | O   | . | HIS | HIS | A | A | 109 | 109 | . | -4.641 | 16.063 | 11.431 | 1.00 | 44.14 | . |
| ATOM | 2045 | CB  | CB  | . | HIS | HIS | A | A | 109 | 109 | . | -4.819 | 14.686 | 9.134  | 1.00 | 49.87 | . |
| ATOM | 2046 | CG  | CG  | . | HIS | HIS | A | A | 109 | 109 | . | -5.489 | 14.250 | 7.869  | 1.00 | 61.18 | . |
| ATOM | 2047 | ND1 | ND1 | . | HIS | HIS | A | A | 109 | 109 | . | -6.470 | 14.997 | 7.253  | 1.00 | 65.80 | . |
| ATOM | 2048 | CD2 | CD2 | . | HIS | HIS | A | A | 109 | 109 | . | -5.337 | 13.134 | 7.116  | 1.00 | 68.17 | . |
| ATOM | 2049 | CE1 | CE1 | . | HIS | HIS | A | A | 109 | 109 | . | -6.894 | 14.361 | 6.176  | 1.00 | 66.87 | . |
| ATOM | 2050 | NE2 | NE2 | . | HIS | HIS | A | A | 109 | 109 | . | -6.224 | 13.228 | 6.070  | 1.00 | 68.33 | . |
| ATOM | 2051 | N   | N   | . | PHE | PHE | A | A | 110 | 110 | . | -3.777 | 17.947 | 10.577 | 1.00 | 36.73 | . |
| ATOM | 2052 | CA  | CA  | . | PHE | PHE | A | A | 110 | 110 | . | -3.791 | 18.642 | 11.854 | 1.00 | 38.47 | . |
| ATOM | 2053 | C   | C   | . | PHE | PHE | A | A | 110 | 110 | . | -4.641 | 19.884 | 11.631 | 1.00 | 34.69 | . |
| ATOM | 2054 | O   | O   | . | PHE | PHE | A | A | 110 | 110 | . | -4.807 | 20.331 | 10.498 | 1.00 | 39.03 | . |
| ATOM | 2055 | CB  | CB  | . | PHE | PHE | A | A | 110 | 110 | . | -2.376 | 19.033 | 12.305 | 1.00 | 37.20 | . |
| ATOM | 2056 | CG  | CG  | . | PHE | PHE | A | A | 110 | 110 | . | -1.517 | 17.863 | 12.708 | 1.00 | 36.66 | . |
| ATOM | 2057 | CD1 | CD1 | . | PHE | PHE | A | A | 110 | 110 | . | -0.729 | 17.204 | 11.773 | 1.00 | 38.68 | . |
| ATOM | 2058 | CD2 | CD2 | . | PHE | PHE | A | A | 110 | 110 | . | -1.504 | 17.416 | 14.026 | 1.00 | 40.00 | . |
| ATOM | 2059 | CE1 | CE1 | . | PHE | PHE | A | A | 110 | 110 | . | 0.065  | 16.111 | 12.144 | 1.00 | 49.27 | . |
| ATOM | 2060 | CE2 | CE2 | . | PHE | PHE | A | A | 110 | 110 | . | -0.718 | 16.328 | 14.409 | 1.00 | 42.84 | . |
| ATOM | 2061 | CZ  | CZ  | . | PHE | PHE | A | A | 110 | 110 | . | 0.070  | 15.673 | 13.465 | 1.00 | 47.93 | . |
| ATOM | 2062 | N   | N   | . | THR | THR | A | A | 111 | 111 | . | -5.187 | 20.439 | 12.704 | 1.00 | 40.91 | . |
| ATOM | 2063 | CA  | CA  | . | THR | THR | A | A | 111 | 111 | . | -6.035 | 21.617 | 12.586 | 1.00 | 38.98 | . |
| ATOM | 2064 | C   | C   | . | THR | THR | A | A | 111 | 111 | . | -5.197 | 22.895 | 12.590 | 1.00 | 38.77 | . |
| ATOM | 2065 | O   | O   | . | THR | THR | A | A | 111 | 111 | . | -4.199 | 22.988 | 13.308 | 1.00 | 40.14 | . |
| ATOM | 2066 | CB  | CB  | . | THR | THR | A | A | 111 | 111 | . | -7.059 | 21.661 | 13.739 | 1.00 | 41.08 | . |
| ATOM | 2067 | OG1 | OG1 | . | THR | THR | A | A | 111 | 111 | . | -8.103 | 22.589 | 13.421 | 1.00 | 52.27 | . |
| ATOM | 2068 | CG2 | CG2 | . | THR | THR | A | A | 111 | 111 | . | -6.384 | 22.090 | 15.033 | 1.00 | 43.62 | . |
| ATOM | 2069 | N   | N   | . | ALA | ALA | A | A | 112 | 112 | . | -5.600 | 23.870 | 11.777 | 1.00 | 31.39 | . |
| ATOM | 2070 | CA  | CA  | . | ALA | ALA | A | A | 112 | 112 | . | -4.892 | 25.147 | 11.689 | 1.00 | 37.46 | . |
| ATOM | 2071 | C   | C   | . | ALA | ALA | A | A | 112 | 112 | . | -4.776 | 25.762 | 13.081 | 1.00 | 40.25 | . |
| ATOM | 2072 | O   | O   | . | ALA | ALA | A | A | 112 | 112 | . | -5.578 | 25.461 | 13.967 | 1.00 | 42.76 | . |
| ATOM | 2073 | CB  | CB  | . | ALA | ALA | A | A | 112 | 112 | . | -5.637 | 26.100 | 10.753 | 1.00 | 30.39 | . |
| ATOM | 2074 | N   | N   | . | PRO | PRO | A | A | 113 | 113 | . | -3.775 | 26.634 | 13.292 | 1.00 | 38.42 | . |
| ATOM | 2075 | CA  | CA  | . | PRO | PRO | A | A | 113 | 113 | . | -3.566 | 27.283 | 14.592 | 1.00 | 35.67 | . |
| ATOM | 2076 | C   | C   | . | PRO | PRO | A | A | 113 | 113 | . | -4.660 | 28.247 | 15.060 | 1.00 | 37.03 | . |
| ATOM | 2077 | O   | O   | . | PRO | PRO | A | A | 113 | 113 | . | -5.039 | 28.223 | 16.226 | 1.00 | 40.77 | . |
| ATOM | 2078 | CB  | CB  | . | PRO | PRO | A | A | 113 | 113 | . | -2.219 | 27.976 | 14.416 | 1.00 | 29.83 | . |
| ATOM | 2079 | CG  | CG  | . | PRO | PRO | A | A | 113 | 113 | . | -2.207 | 28.311 | 12.961 | 1.00 | 29.44 | . |
| ATOM | 2080 | CD  | CD  | . | PRO | PRO | A | A | 113 | 113 | . | -2.730 | 27.038 | 12.336 | 1.00 | 36.05 | . |
| ATOM | 2081 | N   | N   | . | LEU | LEU | A | A | 114 | 114 | . | -5.161 | 29.094 | 14.166 | 1.00 | 35.63 | . |
| ATOM | 2082 | CA  | CA  | . | LEU | LEU | A | A | 114 | 114 | . | -6.199 | 30.054 | 14.543 | 1.00 | 36.64 | . |



|      |      |     |     |   |     |     |   |   |     |     |   |         |        |        |      |       |   |
|------|------|-----|-----|---|-----|-----|---|---|-----|-----|---|---------|--------|--------|------|-------|---|
| ATOM | 2083 | C   | C   | . | LEU | LEU | A | A | 114 | 114 | . | -7.538  | 29.759 | 13.885 | 1.00 | 42.63 | . |
| ATOM | 2084 | O   | O   | . | LEU | LEU | A | A | 114 | 114 | . | -8.577  | 30.242 | 14.335 | 1.00 | 47.02 | . |
| ATOM | 2085 | CB  | CB  | . | LEU | LEU | A | A | 114 | 114 | . | -5.770  | 31.482 | 14.186 | 1.00 | 38.74 | . |
| ATOM | 2086 | CG  | CG  | . | LEU | LEU | A | A | 114 | 114 | . | -4.469  | 32.010 | 14.799 | 1.00 | 40.77 | . |
| ATOM | 2087 | CD1 | CD1 | . | LEU | LEU | A | A | 114 | 114 | . | -4.199  | 33.410 | 14.273 | 1.00 | 39.69 | . |
| ATOM | 2088 | CD2 | CD2 | . | LEU | LEU | A | A | 114 | 114 | . | -4.567  | 32.014 | 16.317 | 1.00 | 40.79 | . |
| ATOM | 2089 | N   | N   | . | SER | SER | A | A | 115 | 115 | . | -7.516  | 28.975 | 12.814 | 1.00 | 36.08 | . |
| ATOM | 2090 | CA  | CA  | . | SER | SER | A | A | 115 | 115 | . | -8.748  | 28.622 | 12.118 | 1.00 | 41.78 | . |
| ATOM | 2091 | C   | C   | . | SER | SER | A | A | 115 | 115 | . | -9.025  | 27.134 | 12.273 | 1.00 | 42.25 | . |
| ATOM | 2092 | O   | O   | . | SER | SER | A | A | 115 | 115 | . | -8.560  | 26.311 | 11.485 | 1.00 | 39.09 | . |
| ATOM | 2093 | CB  | CB  | . | SER | SER | A | A | 115 | 115 | . | -8.648  | 28.993 | 10.640 | 1.00 | 39.54 | . |
| ATOM | 2094 | OG  | OG  | . | SER | SER | A | A | 115 | 115 | . | -8.555  | 30.397 | 10.489 | 1.00 | 35.31 | . |
| ATOM | 2095 | N   | N   | . | LYS | LYS | A | A | 116 | 116 | . | -9.793  | 26.805 | 13.306 | 1.00 | 45.24 | . |
| ATOM | 2096 | CA  | CA  | . | LYS | LYS | A | A | 116 | 116 | . | -10.150 | 25.427 | 13.623 | 1.00 | 45.06 | . |
| ATOM | 2097 | C   | C   | . | LYS | LYS | A | A | 116 | 116 | . | -10.745 | 24.637 | 12.459 | 1.00 | 42.14 | . |
| ATOM | 2098 | O   | O   | . | LYS | LYS | A | A | 116 | 116 | . | -10.520 | 23.428 | 12.343 | 1.00 | 43.54 | . |
| ATOM | 2099 | CB  | CB  | . | LYS | LYS | A | A | 116 | 116 | . | -11.137 | 25.416 | 14.792 | 1.00 | 48.52 | . |
| ATOM | 2100 | CG  | CG  | . | LYS | LYS | A | A | 116 | 116 | . | -10.577 | 25.958 | 16.099 | 1.00 | 52.57 | . |
| ATOM | 2101 | CD  | CD  | . | LYS | LYS | A | A | 116 | 116 | . | -9.574  | 24.998 | 16.722 | 1.00 | 57.98 | . |
| ATOM | 2102 | CE  | CE  | . | LYS | LYS | A | A | 116 | 116 | . | -9.225  | 25.410 | 18.150 | 1.00 | 61.18 | . |
| ATOM | 2103 | NZ  | NZ  | . | LYS | LYS | A | A | 116 | 116 | . | -8.426  | 24.369 | 18.872 | 1.00 | 58.28 | . |
| ATOM | 2104 | N   | N   | . | GLN | GLN | A | A | 117 | 117 | . | -11.506 | 25.313 | 11.603 | 1.00 | 36.04 | . |
| ATOM | 2105 | CA  | CA  | . | GLN | GLN | A | A | 117 | 117 | . | -12.144 | 24.651 | 10.471 | 1.00 | 38.17 | . |
| ATOM | 2106 | C   | C   | . | GLN | GLN | A | A | 117 | 117 | . | -11.180 | 24.309 | 9.346  | 1.00 | 40.86 | . |
| ATOM | 2107 | O   | O   | . | GLN | GLN | A | A | 117 | 117 | . | -11.542 | 23.597 | 8.403  | 1.00 | 39.81 | . |
| ATOM | 2108 | CB  | CB  | . | GLN | GLN | A | A | 117 | 117 | . | -13.268 | 25.517 | 9.898  | 1.00 | 38.01 | . |
| ATOM | 2109 | CG  | CG  | . | GLN | GLN | A | A | 117 | 117 | . | -13.562 | 26.811 | 10.649 | 1.00 | 49.40 | . |
| ATOM | 2110 | CD  | CD  | . | GLN | GLN | A | A | 117 | 117 | . | -12.477 | 27.862 | 10.496 | 1.00 | 36.04 | . |
| ATOM | 2111 | OE1 | OE1 | . | GLN | GLN | A | A | 117 | 117 | . | -11.435 | 27.796 | 11.147 | 1.00 | 47.61 | . |
| ATOM | 2112 | NE2 | NE2 | . | GLN | GLN | A | A | 117 | 117 | . | -12.717 | 28.838 | 9.626  | 1.00 | 30.21 | . |
| ATOM | 2113 | N   | N   | . | HIS | HIS | A | A | 118 | 118 | . | -9.956  | 24.816 | 9.436  | 1.00 | 35.91 | . |
| ATOM | 2114 | CA  | CA  | . | HIS | HIS | A | A | 118 | 118 | . | -8.986  | 24.558 | 8.392  | 1.00 | 31.16 | . |
| ATOM | 2115 | C   | C   | . | HIS | HIS | A | A | 118 | 118 | . | -7.818  | 23.680 | 8.799  | 1.00 | 35.68 | . |
| ATOM | 2116 | O   | O   | . | HIS | HIS | A | A | 118 | 118 | . | -7.559  | 23.449 | 9.983  | 1.00 | 37.44 | . |
| ATOM | 2117 | CB  | CB  | . | HIS | HIS | A | A | 118 | 118 | . | -8.483  | 25.879 | 7.805  | 1.00 | 34.15 | . |
| ATOM | 2118 | CG  | CG  | . | HIS | HIS | A | A | 118 | 118 | . | -9.538  | 26.639 | 7.062  | 1.00 | 30.13 | . |
| ATOM | 2119 | ND1 | ND1 | . | HIS | HIS | A | A | 118 | 118 | . | -10.397 | 26.033 | 6.170  | 1.00 | 34.64 | . |
| ATOM | 2120 | CD2 | CD2 | . | HIS | HIS | A | A | 118 | 118 | . | -9.865  | 27.952 | 7.065  | 1.00 | 30.49 | . |
| ATOM | 2121 | CE1 | CE1 | . | HIS | HIS | A | A | 118 | 118 | . | -11.207 | 26.939 | 5.653  | 1.00 | 34.06 | . |
| ATOM | 2122 | NE2 | NE2 | . | HIS | HIS | A | A | 118 | 118 | . | -10.905 | 28.113 | 6.180  | 1.00 | 36.14 | . |
| ATOM | 2123 | N   | N   | . | GLN | GLN | A | A | 119 | 119 | . | -7.123  | 23.195 | 7.779  | 1.00 | 32.92 | . |
| ATOM | 2124 | CA  | CA  | . | GLN | GLN | A | A | 119 | 119 | . | -5.981  | 22.314 | 7.928  | 1.00 | 29.72 | . |
| ATOM | 2125 | C   | C   | . | GLN | GLN | A | A | 119 | 119 | . | -4.700  | 23.125 | 8.113  | 1.00 | 32.33 | . |
| ATOM | 2126 | O   | O   | . | GLN | GLN | A | A | 119 | 119 | . | -4.536  | 24.193 | 7.520  | 1.00 | 26.83 | . |
| ATOM | 2127 | CB  | CB  | . | GLN | GLN | A | A | 119 | 119 | . | -5.902  | 21.440 | 6.681  | 1.00 | 33.59 | . |
| ATOM | 2128 | CG  | CG  | . | GLN | GLN | A | A | 119 | 119 | . | -4.839  | 20.371 | 6.665  | 1.00 | 35.49 | . |
| ATOM | 2129 | CD  | CD  | . | GLN | GLN | A | A | 119 | 119 | . | -4.978  | 19.492 | 5.440  | 1.00 | 44.06 | . |
| ATOM | 2130 | OE1 | OE1 | . | GLN | GLN | A | A | 119 | 119 | . | -5.926  | 18.710 | 5.330  | 1.00 | 45.61 | . |
| ATOM | 2131 | NE2 | NE2 | . | GLN | GLN | A | A | 119 | 119 | . | -4.051  | 19.631 | 4.499  | 1.00 | 27.33 | . |
| ATOM | 2132 | N   | N   | . | GLU | GLU | A | A | 120 | 120 | . | -3.801  | 22.607 | 8.943  | 1.00 | 27.21 | . |
| ATOM | 2133 | CA  | CA  | . | GLU | GLU | A | A | 120 | 120 | . | -2.532  | 23.262 | 9.239  | 1.00 | 31.98 | . |
| ATOM | 2134 | C   | C   | . | GLU | GLU | A | A | 120 | 120 | . | -1.547  | 23.161 | 8.081  | 1.00 | 33.12 | . |
| ATOM | 2135 | O   | O   | . | GLU | GLU | A | A | 120 | 120 | . | -1.504  | 22.158 | 7.367  | 1.00 | 27.43 | . |
| ATOM | 2136 | CB  | CB  | . | GLU | GLU | A | A | 120 | 120 | . | -1.888  | 22.625 | 10.477 | 1.00 | 26.34 | . |
| ATOM | 2137 | CG  | CG  | . | GLU | GLU | A | A | 120 | 120 | . | -0.662  | 23.351 | 11.017 | 1.00 | 26.41 | . |
| ATOM | 2138 | CD  | CD  | . | GLU | GLU | A | A | 120 | 120 | . | 0.187   | 22.473 | 11.936 | 1.00 | 37.34 | . |
| ATOM | 2139 | OE1 | OE1 | . | GLU | GLU | A | A | 120 | 120 | . | 1.036   | 21.709 | 11.424 | 1.00 | 34.01 | . |

|      |      |     |     |   |     |     |   |   |     |     |   |        |        |        |      |       |   |
|------|------|-----|-----|---|-----|-----|---|---|-----|-----|---|--------|--------|--------|------|-------|---|
| ATOM | 2140 | OE2 | OE2 | . | GLU | GLU | A | A | 120 | 120 | . | 0.002  | 22.537 | 13.170 | 1.00 | 34.00 | . |
| ATOM | 2141 | N   | N   | . | VAL | VAL | A | A | 121 | 121 | . | -0.760 | 24.217 | 7.902  | 1.00 | 28.68 | . |
| ATOM | 2142 | CA  | CA  | . | VAL | VAL | A | A | 121 | 121 | . | 0.268  | 24.247 | 6.874  | 1.00 | 18.26 | . |
| ATOM | 2143 | C   | C   | . | VAL | VAL | A | A | 121 | 121 | . | 1.545  | 24.589 | 7.631  | 1.00 | 15.73 | . |
| ATOM | 2144 | O   | O   | . | VAL | VAL | A | A | 121 | 121 | . | 1.594  | 25.571 | 8.356  | 1.00 | 22.39 | . |
| ATOM | 2145 | CB  | CB  | . | VAL | VAL | A | A | 121 | 121 | . | -0.030 | 25.307 | 5.796  | 1.00 | 22.34 | . |
| ATOM | 2146 | CG1 | CG1 | . | VAL | VAL | A | A | 121 | 121 | . | 1.180  | 25.476 | 4.887  | 1.00 | 16.48 | . |
| ATOM | 2147 | CG2 | CG2 | . | VAL | VAL | A | A | 121 | 121 | . | -1.234 | 24.868 | 4.967  | 1.00 | 26.65 | . |
| ATOM | 2148 | N   | N   | . | SER | SER | A | A | 122 | 122 | . | 2.577  | 23.775 | 7.469  | 1.00 | 17.73 | . |
| ATOM | 2149 | CA  | CA  | . | SER | SER | A | A | 122 | 122 | . | 3.819  | 23.998 | 8.198  | 1.00 | 16.30 | . |
| ATOM | 2150 | C   | C   | . | SER | SER | A | A | 122 | 122 | . | 5.046  | 23.909 | 7.313  | 1.00 | 19.39 | . |
| ATOM | 2151 | O   | O   | . | SER | SER | A | A | 122 | 122 | . | 4.944  | 23.637 | 6.117  | 1.00 | 18.32 | . |
| ATOM | 2152 | CB  | CB  | . | SER | SER | A | A | 122 | 122 | . | 3.926  | 22.959 | 9.317  | 1.00 | 19.03 | . |
| ATOM | 2153 | OG  | OG  | . | SER | SER | A | A | 122 | 122 | . | 3.913  | 21.644 | 8.768  | 1.00 | 21.56 | . |
| ATOM | 2154 | N   | N   | . | ALA | ALA | A | A | 123 | 123 | . | 6.206  | 24.166 | 7.912  | 1.00 | 16.70 | . |
| ATOM | 2155 | CA  | CA  | . | ALA | ALA | A | A | 123 | 123 | . | 7.491  | 24.070 | 7.228  | 1.00 | 16.07 | . |
| ATOM | 2156 | C   | C   | . | ALA | ALA | A | A | 123 | 123 | . | 8.106  | 22.862 | 7.935  | 1.00 | 26.23 | . |
| ATOM | 2157 | O   | O   | . | ALA | ALA | A | A | 123 | 123 | . | 8.424  | 22.925 | 9.125  | 1.00 | 20.74 | . |
| ATOM | 2158 | CB  | CB  | . | ALA | ALA | A | A | 123 | 123 | . | 8.319  | 25.312 | 7.470  | 1.00 | 20.94 | . |
| ATOM | 2159 | N   | N   | . | PHE | PHE | A | A | 124 | 124 | . | 8.253  | 21.762 | 7.206  | 1.00 | 21.78 | . |
| ATOM | 2160 | CA  | CA  | . | PHE | PHE | A | A | 124 | 124 | . | 8.747  | 20.532 | 7.802  | 1.00 | 27.82 | . |
| ATOM | 2161 | C   | C   | . | PHE | PHE | A | A | 124 | 124 | . | 10.034 | 19.914 | 7.269  | 1.00 | 21.85 | . |
| ATOM | 2162 | O   | O   | . | PHE | PHE | A | A | 124 | 124 | . | 10.472 | 20.181 | 6.149  | 1.00 | 23.70 | . |
| ATOM | 2163 | CB  | CB  | . | PHE | PHE | A | A | 124 | 124 | . | 7.610  | 19.489 | 7.760  | 1.00 | 33.17 | . |
| ATOM | 2164 | CG  | CG  | . | PHE | PHE | A | A | 124 | 124 | . | 8.069  | 18.065 | 7.962  | 1.00 | 46.24 | . |
| ATOM | 2165 | CD1 | CD1 | . | PHE | PHE | A | A | 124 | 124 | . | 8.414  | 17.266 | 6.870  | 1.00 | 50.24 | . |
| ATOM | 2166 | CD2 | CD2 | . | PHE | PHE | A | A | 124 | 124 | . | 8.184  | 17.534 | 9.242  | 1.00 | 44.44 | . |
| ATOM | 2167 | CE1 | CE1 | . | PHE | PHE | A | A | 124 | 124 | . | 8.867  | 15.956 | 7.053  | 1.00 | 55.94 | . |
| ATOM | 2168 | CE2 | CE2 | . | PHE | PHE | A | A | 124 | 124 | . | 8.636  | 16.229 | 9.438  | 1.00 | 50.06 | . |
| ATOM | 2169 | CZ  | CZ  | . | PHE | PHE | A | A | 124 | 124 | . | 8.979  | 15.438 | 8.340  | 1.00 | 50.60 | . |
| ATOM | 2170 | N   | N   | . | GLY | GLY | A | A | 125 | 125 | . | 10.644 | 19.095 | 8.126  | 1.00 | 28.18 | . |
| ATOM | 2171 | CA  | CA  | . | GLY | GLY | A | A | 125 | 125 | . | 11.848 | 18.361 | 7.784  | 1.00 | 18.74 | . |
| ATOM | 2172 | C   | C   | . | GLY | GLY | A | A | 125 | 125 | . | 13.020 | 19.002 | 7.077  | 1.00 | 19.21 | . |
| ATOM | 2173 | O   | O   | . | GLY | GLY | A | A | 125 | 125 | . | 13.539 | 20.031 | 7.508  | 1.00 | 25.00 | . |
| ATOM | 2174 | N   | N   | . | SER | SER | A | A | 126 | 126 | . | 13.442 | 18.355 | 5.992  | 1.00 | 15.81 | . |
| ATOM | 2175 | CA  | CA  | . | SER | SER | A | A | 126 | 126 | . | 14.588 | 18.768 | 5.186  | 1.00 | 17.95 | . |
| ATOM | 2176 | C   | C   | . | SER | SER | A | A | 126 | 126 | . | 14.617 | 17.850 | 3.971  | 1.00 | 11.07 | . |
| ATOM | 2177 | O   | O   | . | SER | SER | A | A | 126 | 126 | . | 13.721 | 17.039 | 3.796  | 1.00 | 23.18 | . |
| ATOM | 2178 | CB  | CB  | . | SER | SER | A | A | 126 | 126 | . | 15.879 | 18.560 | 5.977  | 1.00 | 36.05 | . |
| ATOM | 2179 | OG  | OG  | . | SER | SER | A | A | 126 | 126 | . | 16.071 | 17.171 | 6.227  | 1.00 | 32.55 | . |
| ATOM | 2180 | N   | N   | . | GLU | GLU | A | A | 127 | 127 | . | 15.651 | 17.953 | 3.145  | 1.00 | 18.71 | . |
| ATOM | 2181 | CA  | CA  | . | GLU | GLU | A | A | 127 | 127 | . | 15.739 | 17.092 | 1.972  | 1.00 | 25.35 | . |
| ATOM | 2182 | C   | C   | . | GLU | GLU | A | A | 127 | 127 | . | 15.793 | 15.623 | 2.384  | 1.00 | 32.33 | . |
| ATOM | 2183 | O   | O   | . | GLU | GLU | A | A | 127 | 127 | . | 15.260 | 14.748 | 1.694  | 1.00 | 28.03 | . |
| ATOM | 2184 | CB  | CB  | . | GLU | GLU | A | A | 127 | 127 | . | 16.974 | 17.445 | 1.139  | 1.00 | 26.06 | . |
| ATOM | 2185 | CG  | CG  | . | GLU | GLU | A | A | 127 | 127 | . | 16.824 | 18.743 | 0.372  | 1.00 | 30.24 | . |
| ATOM | 2186 | CD  | CD  | . | GLU | GLU | A | A | 127 | 127 | . | 18.035 | 19.083 | -0.462 | 1.00 | 32.52 | . |
| ATOM | 2187 | OE1 | OE1 | . | GLU | GLU | A | A | 127 | 127 | . | 18.489 | 18.227 | -1.254 | 1.00 | 36.10 | . |
| ATOM | 2188 | OE2 | OE2 | . | GLU | GLU | A | A | 127 | 127 | . | 18.527 | 20.219 | -0.333 | 1.00 | 30.08 | . |
| ATOM | 2189 | N   | N   | . | ALA | ALA | A | A | 128 | 128 | . | 16.435 | 15.362 | 3.518  | 1.00 | 34.35 | . |
| ATOM | 2190 | CA  | CA  | . | ALA | ALA | A | A | 128 | 128 | . | 16.571 | 14.004 | 4.028  | 1.00 | 31.82 | . |
| ATOM | 2191 | C   | C   | . | ALA | ALA | A | A | 128 | 128 | . | 15.270 | 13.459 | 4.605  | 1.00 | 23.86 | . |
| ATOM | 2192 | O   | O   | . | ALA | ALA | A | A | 128 | 128 | . | 14.964 | 12.287 | 4.424  | 1.00 | 24.55 | . |
| ATOM | 2193 | CB  | CB  | . | ALA | ALA | A | A | 128 | 128 | . | 17.669 | 13.953 | 5.093  | 1.00 | 29.10 | . |
| ATOM | 2194 | N   | N   | . | GLU | GLU | A | A | 129 | 129 | . | 14.506 | 14.301 | 5.294  | 1.00 | 21.94 | . |
| ATOM | 2195 | CA  | CA  | . | GLU | GLU | A | A | 129 | 129 | . | 13.254 | 13.857 | 5.911  | 1.00 | 23.13 | . |
| ATOM | 2196 | C   | C   | . | GLU | GLU | A | A | 129 | 129 | . | 12.007 | 14.032 | 5.043  | 1.00 | 21.98 | . |

|      |      |     |     |   |     |     |   |   |     |     |   |        |        |        |      |       |   |
|------|------|-----|-----|---|-----|-----|---|---|-----|-----|---|--------|--------|--------|------|-------|---|
| ATOM | 2197 | O   | O   | . | GLU | GLU | A | A | 129 | 129 | . | 10.924 | 13.589 | 5.417  | 1.00 | 24.31 | . |
| ATOM | 2198 | CB  | CB  | . | GLU | GLU | A | A | 129 | 129 | . | 13.005 | 14.615 | 7.214  | 1.00 | 16.36 | . |
| ATOM | 2199 | CG  | CG  | . | GLU | GLU | A | A | 129 | 129 | . | 14.116 | 14.538 | 8.242  | 1.00 | 20.95 | . |
| ATOM | 2200 | CD  | CD  | . | GLU | GLU | A | A | 129 | 129 | . | 13.968 | 15.613 | 9.293  | 1.00 | 14.22 | . |
| ATOM | 2201 | OE1 | OE1 | . | GLU | GLU | A | A | 129 | 129 | . | 13.264 | 15.391 | 10.298 | 1.00 | 30.84 | . |
| ATOM | 2202 | OE2 | OE2 | . | GLU | GLU | A | A | 129 | 129 | . | 14.541 | 16.704 | 9.097  | 1.00 | 30.97 | . |
| ATOM | 2203 | N   | N   | . | SER | SER | A | A | 130 | 130 | . | 12.153 | 14.704 | 3.911  | 1.00 | 22.32 | . |
| ATOM | 2204 | CA  | CA  | . | SER | SER | A | A | 130 | 130 | . | 11.019 | 14.970 | 3.029  | 1.00 | 27.80 | . |
| ATOM | 2205 | C   | C   | . | SER | SER | A | A | 130 | 130 | . | 10.224 | 13.723 | 2.638  | 1.00 | 28.32 | . |
| ATOM | 2206 | O   | O   | . | SER | SER | A | A | 130 | 130 | . | 10.803 | 12.685 | 2.311  | 1.00 | 26.71 | . |
| ATOM | 2207 | CB  | CB  | . | SER | SER | A | A | 130 | 130 | . | 11.511 | 15.679 | 1.766  | 1.00 | 31.02 | . |
| ATOM | 2208 | OG  | OG  | . | SER | SER | A | A | 130 | 130 | . | 10.430 | 16.019 | 0.911  | 1.00 | 27.26 | . |
| ATOM | 2209 | N   | N   | . | ASP | ASP | A | A | 131 | 131 | . | 8.897  | 13.838 | 2.682  | 1.00 | 27.76 | . |
| ATOM | 2210 | CA  | CA  | . | ASP | ASP | A | A | 131 | 131 | . | 7.997  | 12.744 | 2.305  | 1.00 | 33.60 | . |
| ATOM | 2211 | C   | C   | . | ASP | ASP | A | A | 131 | 131 | . | 6.868  | 13.257 | 1.406  | 1.00 | 28.61 | . |
| ATOM | 2212 | O   | O   | . | ASP | ASP | A | A | 131 | 131 | . | 6.863  | 14.429 | 1.025  | 1.00 | 28.09 | . |
| ATOM | 2213 | CB  | CB  | . | ASP | ASP | A | A | 131 | 131 | . | 7.409  | 12.053 | 3.547  | 1.00 | 27.91 | . |
| ATOM | 2214 | CG  | CG  | . | ASP | ASP | A | A | 131 | 131 | . | 6.581  | 12.987 | 4.416  | 1.00 | 30.93 | . |
| ATOM | 2215 | OD1 | OD1 | . | ASP | ASP | A | A | 131 | 131 | . | 5.915  | 13.897 | 3.879  | 1.00 | 32.83 | . |
| ATOM | 2216 | OD2 | OD2 | . | ASP | ASP | A | A | 131 | 131 | . | 6.576  | 12.793 | 5.651  | 1.00 | 35.70 | . |
| ATOM | 2217 | N   | N   | . | THR | THR | A | A | 132 | 132 | . | 5.912  | 12.389 | 1.076  | 1.00 | 26.65 | . |
| ATOM | 2218 | CA  | CA  | . | THR | THR | A | A | 132 | 132 | . | 4.792  | 12.765 | 0.202  | 1.00 | 25.17 | . |
| ATOM | 2219 | C   | C   | . | THR | THR | A | A | 132 | 132 | . | 3.985  | 13.963 | 0.716  | 1.00 | 23.58 | . |
| ATOM | 2220 | O   | O   | . | THR | THR | A | A | 132 | 132 | . | 3.286  | 14.632 | -0.053 | 1.00 | 20.37 | . |
| ATOM | 2221 | CB  | CB  | . | THR | THR | A | A | 132 | 132 | . | 3.815  | 11.574 | -0.018 | 1.00 | 21.23 | . |
| ATOM | 2222 | OG1 | OG1 | . | THR | THR | A | A | 132 | 132 | . | 3.251  | 11.168 | 1.236  | 1.00 | 25.42 | . |
| ATOM | 2223 | CG2 | CG2 | . | THR | THR | A | A | 132 | 132 | . | 4.538  | 10.402 | -0.646 | 1.00 | 31.36 | . |
| ATOM | 2224 | N   | N   | . | GLY | GLY | A | A | 133 | 133 | . | 4.073  | 14.225 | 2.015  | 1.00 | 19.33 | . |
| ATOM | 2225 | CA  | CA  | . | GLY | GLY | A | A | 133 | 133 | . | 3.352  | 15.350 | 2.587  | 1.00 | 16.23 | . |
| ATOM | 2226 | C   | C   | . | GLY | GLY | A | A | 133 | 133 | . | 3.873  | 16.700 | 2.108  | 1.00 | 17.50 | . |
| ATOM | 2227 | O   | O   | . | GLY | GLY | A | A | 133 | 133 | . | 3.232  | 17.727 | 2.341  | 1.00 | 21.71 | . |
| ATOM | 2228 | N   | N   | . | ASP | ASP | A | A | 134 | 134 | . | 5.028  | 16.704 | 1.446  | 1.00 | 14.38 | . |
| ATOM | 2229 | CA  | CA  | . | ASP | ASP | A | A | 134 | 134 | . | 5.629  | 17.937 | 0.943  | 1.00 | 14.69 | . |
| ATOM | 2230 | C   | C   | . | ASP | ASP | A | A | 134 | 134 | . | 5.219  | 18.256 | -0.499 | 1.00 | 22.75 | . |
| ATOM | 2231 | O   | O   | . | ASP | ASP | A | A | 134 | 134 | . | 5.552  | 19.331 | -1.006 | 1.00 | 17.00 | . |
| ATOM | 2232 | CB  | CB  | . | ASP | ASP | A | A | 134 | 134 | . | 7.166  | 17.865 | 0.992  | 1.00 | 11.31 | . |
| ATOM | 2233 | CG  | CG  | . | ASP | ASP | A | A | 134 | 134 | . | 7.715  | 17.735 | 2.412  | 1.00 | 20.68 | . |
| ATOM | 2234 | OD1 | OD1 | . | ASP | ASP | A | A | 134 | 134 | . | 7.095  | 18.274 | 3.349  | 1.00 | 20.93 | . |
| ATOM | 2235 | OD2 | OD2 | . | ASP | ASP | A | A | 134 | 134 | . | 8.787  | 17.108 | 2.578  | 1.00 | 19.47 | . |
| ATOM | 2236 | N   | N   | . | ASP | ASP | A | A | 135 | 135 | . | 4.506  | 17.327 | -1.148 | 1.00 | 16.29 | . |
| ATOM | 2237 | CA  | CA  | . | ASP | ASP | A | A | 135 | 135 | . | 4.085  | 17.507 | -2.539 | 1.00 | 15.04 | . |
| ATOM | 2238 | C   | C   | . | ASP | ASP | A | A | 135 | 135 | . | 2.864  | 18.407 | -2.746 | 1.00 | 11.53 | . |
| ATOM | 2239 | O   | O   | . | ASP | ASP | A | A | 135 | 135 | . | 1.827  | 18.226 | -2.110 | 1.00 | 18.19 | . |
| ATOM | 2240 | CB  | CB  | . | ASP | ASP | A | A | 135 | 135 | . | 3.791  | 16.150 | -3.203 | 1.00 | 21.95 | . |
| ATOM | 2241 | CG  | CG  | . | ASP | ASP | A | A | 135 | 135 | . | 5.044  | 15.313 | -3.441 | 1.00 | 30.84 | . |
| ATOM | 2242 | OD1 | OD1 | . | ASP | ASP | A | A | 135 | 135 | . | 6.156  | 15.881 | -3.552 | 1.00 | 24.55 | . |
| ATOM | 2243 | OD2 | OD2 | . | ASP | ASP | A | A | 135 | 135 | . | 4.905  | 14.071 | -3.538 | 1.00 | 28.43 | . |
| ATOM | 2244 | N   | N   | . | TRP | TRP | A | A | 136 | 136 | . | 2.996  | 19.359 | -3.665 | 1.00 | 16.58 | . |
| ATOM | 2245 | CA  | CA  | . | TRP | TRP | A | A | 136 | 136 | . | 1.916  | 20.281 | -4.001 | 1.00 | 16.95 | . |
| ATOM | 2246 | C   | C   | . | TRP | TRP | A | A | 136 | 136 | . | 1.716  | 20.304 | -5.517 | 1.00 | 23.66 | . |
| ATOM | 2247 | O   | O   | . | TRP | TRP | A | A | 136 | 136 | . | 2.683  | 20.415 | -6.273 | 1.00 | 20.27 | . |
| ATOM | 2248 | CB  | CB  | . | TRP | TRP | A | A | 136 | 136 | . | 2.237  | 21.703 | -3.534 | 1.00 | 17.98 | . |
| ATOM | 2249 | CG  | CG  | . | TRP | TRP | A | A | 136 | 136 | . | 2.406  | 21.835 | -2.052 | 1.00 | 15.86 | . |
| ATOM | 2250 | CD1 | CD1 | . | TRP | TRP | A | A | 136 | 136 | . | 3.524  | 21.541 | -1.329 | 1.00 | 20.12 | . |
| ATOM | 2251 | CD2 | CD2 | . | TRP | TRP | A | A | 136 | 136 | . | 1.426  | 22.288 | -1.110 | 1.00 | 17.06 | . |
| ATOM | 2252 | NE1 | NE1 | . | TRP | TRP | A | A | 136 | 136 | . | 3.306  | 21.785 | 0.004  | 1.00 | 15.44 | . |
| ATOM | 2253 | CE2 | CE2 | . | TRP | TRP | A | A | 136 | 136 | . | 2.027  | 22.242 | 0.170  | 1.00 | 13.01 | . |

|      |      |     |     |   |     |     |   |   |     |     |   |        |        |         |      |       |   |
|------|------|-----|-----|---|-----|-----|---|---|-----|-----|---|--------|--------|---------|------|-------|---|
| ATOM | 2254 | CE3 | CE3 | . | TRP | TRP | A | A | 136 | 136 | . | 0.103  | 22.727 | -1.220  | 1.00 | 20.42 | . |
| ATOM | 2255 | CZ2 | CZ2 | . | TRP | TRP | A | A | 136 | 136 | . | 1.349  | 22.618 | 1.331   | 1.00 | 15.09 | . |
| ATOM | 2256 | CZ3 | CZ3 | . | TRP | TRP | A | A | 136 | 136 | . | -0.575 | 23.105 | -0.060  | 1.00 | 25.06 | . |
| ATOM | 2257 | CH2 | CH2 | . | TRP | TRP | A | A | 136 | 136 | . | 0.052  | 23.046 | 1.199   | 1.00 | 21.57 | . |
| ATOM | 2258 | N   | N   | . | THR | THR | A | A | 137 | 137 | . | 0.465  | 20.196 | -5.952  | 1.00 | 17.03 | . |
| ATOM | 2259 | CA  | CA  | . | THR | THR | A | A | 137 | 137 | . | 0.153  | 20.224 | -7.373  | 1.00 | 15.09 | . |
| ATOM | 2260 | C   | C   | . | THR | THR | A | A | 137 | 137 | . | 0.025  | 21.671 | -7.803  | 1.00 | 14.33 | . |
| ATOM | 2261 | O   | O   | . | THR | THR | A | A | 137 | 137 | . | -0.688 | 22.451 | -7.169  | 1.00 | 21.35 | . |
| ATOM | 2262 | CB  | CB  | . | THR | THR | A | A | 137 | 137 | . | -1.174 | 19.508 | -7.670  | 1.00 | 17.86 | . |
| ATOM | 2263 | OG1 | OG1 | . | THR | THR | A | A | 137 | 137 | . | -1.087 | 18.147 | -7.243  | 1.00 | 18.87 | . |
| ATOM | 2264 | CG2 | CG2 | . | THR | THR | A | A | 137 | 137 | . | -1.473 | 19.540 | -9.166  | 1.00 | 25.03 | . |
| ATOM | 2265 | N   | N   | . | VAL | VAL | A | A | 138 | 138 | . | 0.725  | 22.042 | -8.864  | 1.00 | 14.76 | . |
| ATOM | 2266 | CA  | CA  | . | VAL | VAL | A | A | 138 | 138 | . | 0.655  | 23.410 | -9.348  | 1.00 | 17.24 | . |
| ATOM | 2267 | C   | C   | . | VAL | VAL | A | A | 138 | 138 | . | -0.570 | 23.541 | -10.243 | 1.00 | 22.50 | . |
| ATOM | 2268 | O   | O   | . | VAL | VAL | A | A | 138 | 138 | . | -0.708 | 22.825 | -11.235 | 1.00 | 19.89 | . |
| ATOM | 2269 | CB  | CB  | . | VAL | VAL | A | A | 138 | 138 | . | 1.903  | 23.800 | -10.150 | 1.00 | 15.87 | . |
| ATOM | 2270 | CG1 | CG1 | . | VAL | VAL | A | A | 138 | 138 | . | 1.859  | 25.281 | -10.485 | 1.00 | 16.41 | . |
| ATOM | 2271 | CG2 | CG2 | . | VAL | VAL | A | A | 138 | 138 | . | 3.158  | 23.482 | -9.341  | 1.00 | 24.07 | . |
| ATOM | 2272 | N   | N   | . | ILE | ILE | A | A | 139 | 139 | . | -1.465 | 24.448 | -9.877  | 1.00 | 20.60 | . |
| ATOM | 2273 | CA  | CA  | . | ILE | ILE | A | A | 139 | 139 | . | -2.677 | 24.643 | -10.655 | 1.00 | 25.88 | . |
| ATOM | 2274 | C   | C   | . | ILE | ILE | A | A | 139 | 139 | . | -2.619 | 25.920 | -11.477 | 1.00 | 25.97 | . |
| ATOM | 2275 | O   | O   | . | ILE | ILE | A | A | 139 | 139 | . | -2.970 | 26.999 | -10.999 | 1.00 | 28.06 | . |
| ATOM | 2276 | CB  | CB  | . | ILE | ILE | A | A | 139 | 139 | . | -3.925 | 24.676 | -9.745  | 1.00 | 23.88 | . |
| ATOM | 2277 | CG1 | CG1 | . | ILE | ILE | A | A | 139 | 139 | . | -4.019 | 23.374 | -8.958  | 1.00 | 25.32 | . |
| ATOM | 2278 | CG2 | CG2 | . | ILE | ILE | A | A | 139 | 139 | . | -5.193 | 24.853 | -10.584 | 1.00 | 28.00 | . |
| ATOM | 2279 | CD1 | CD1 | . | ILE | ILE | A | A | 139 | 139 | . | -5.173 | 23.329 | -8.000  | 1.00 | 34.89 | . |
| ATOM | 2280 | N   | N   | . | CYS | CYS | A | A | 140 | 140 | . | -2.128 | 25.795 | -12.704 | 1.00 | 24.56 | . |
| ATOM | 2281 | CA  | CA  | . | CYS | CYS | A | A | 140 | 140 | . | -2.070 | 26.922 | -13.615 | 1.00 | 26.01 | . |
| ATOM | 2282 | C   | C   | . | CYS | CYS | A | A | 140 | 140 | . | -2.735 | 26.530 | -14.936 | 1.00 | 32.54 | . |
| ATOM | 2283 | O   | O   | . | CYS | CYS | A | A | 140 | 140 | . | -2.955 | 25.347 | -15.196 | 1.00 | 30.16 | . |
| ATOM | 2284 | CB  | CB  | . | CYS | CYS | A | A | 140 | 140 | . | -0.632 | 27.418 | -13.844 | 1.00 | 26.38 | . |
| ATOM | 2285 | SG  | SG  | . | CYS | CYS | A | A | 140 | 140 | . | 0.782  | 26.296 | -14.153 | 1.00 | 36.60 | . |
| ATOM | 2286 | N   | N   | . | ASN | ASN | A | A | 141 | 141 | . | -3.085 | 27.519 | -15.751 | 1.00 | 35.88 | . |
| ATOM | 2287 | CA  | CA  | . | ASN | ASN | A | A | 141 | 141 | . | -3.741 | 27.237 | -17.023 | 1.00 | 46.03 | . |
| ATOM | 2288 | C   | C   | . | ASN | ASN | A | A | 141 | 141 | . | -2.737 | 27.019 | -18.137 | 1.00 | 46.65 | . |
| ATOM | 2289 | O   | O   | . | ASN | ASN | A | A | 141 | 141 | . | -1.637 | 27.570 | -18.113 | 1.00 | 40.67 | . |
| ATOM | 2290 | CB  | CB  | . | ASN | ASN | A | A | 141 | 141 | . | -4.706 | 28.362 | -17.388 | 1.00 | 48.52 | . |
| ATOM | 2291 | CG  | CG  | . | ASN | ASN | A | A | 141 | 141 | . | -5.932 | 28.363 | -16.513 | 1.00 | 45.87 | . |
| ATOM | 2292 | OD1 | OD1 | . | ASN | ASN | A | A | 141 | 141 | . | -6.591 | 27.334 | -16.354 | 1.00 | 40.76 | . |
| ATOM | 2293 | ND2 | ND2 | . | ASN | ASN | A | A | 141 | 141 | . | -6.253 | 29.516 | -15.936 | 1.00 | 48.83 | . |
| ATOM | 2294 | N   | N   | . | GLY | GLY | A | A | 142 | 142 | . | -3.131 | 26.218 | -19.121 | 1.00 | 51.93 | . |
| ATOM | 2295 | CA  | CA  | . | GLY | GLY | A | A | 142 | 142 | . | -2.227 | 25.900 | -20.208 | 1.00 | 57.24 | . |
| ATOM | 2296 | C   | C   | . | GLY | GLY | A | A | 142 | 142 | . | -1.367 | 24.789 | -19.643 | 1.00 | 57.57 | . |
| ATOM | 2297 | O   | O   | . | GLY | GLY | A | A | 142 | 142 | . | -1.832 | 24.031 | -18.791 | 1.00 | 51.15 | . |
| ATOM | 2298 | N   | N   | . | ASP | ASP | A | A | 143 | 143 | . | -0.126 | 24.666 | -20.091 | 1.00 | 57.49 | . |
| ATOM | 2299 | CA  | CA  | . | ASP | ASP | A | A | 143 | 143 | . | 0.707  | 23.618 | -19.528 | 1.00 | 67.33 | . |
| ATOM | 2300 | C   | C   | . | ASP | ASP | A | A | 143 | 143 | . | 2.173  | 23.994 | -19.465 | 1.00 | 58.62 | . |
| ATOM | 2301 | O   | O   | . | ASP | ASP | A | A | 143 | 143 | . | 3.022  | 23.389 | -20.112 | 1.00 | 70.78 | . |
| ATOM | 2302 | CB  | CB  | . | ASP | ASP | A | A | 143 | 143 | . | 0.532  | 22.304 | -20.292 | 1.00 | 77.12 | . |
| ATOM | 2303 | CG  | CG  | . | ASP | ASP | A | A | 143 | 143 | . | 0.886  | 21.096 | -19.437 | 1.00 | 84.59 | . |
| ATOM | 2304 | OD1 | OD1 | . | ASP | ASP | A | A | 143 | 143 | . | 2.037  | 21.037 | -18.959 | 1.00 | 85.03 | . |
| ATOM | 2305 | OD2 | OD2 | . | ASP | ASP | A | A | 143 | 143 | . | 0.016  | 20.218 | -19.232 | 1.00 | 89.37 | . |
| ATOM | 2306 | N   | N   | . | GLU | GLU | A | A | 144 | 144 | . | 2.449  | 25.018 | -18.667 | 1.00 | 54.21 | . |
| ATOM | 2307 | CA  | CA  | . | GLU | GLU | A | A | 144 | 144 | . | 3.792  | 25.516 | -18.445 | 1.00 | 52.06 | . |
| ATOM | 2308 | C   | C   | . | GLU | GLU | A | A | 144 | 144 | . | 3.672  | 26.743 | -17.552 | 1.00 | 45.56 | . |
| ATOM | 2309 | O   | O   | . | GLU | GLU | A | A | 144 | 144 | . | 3.290  | 27.826 | -18.000 | 1.00 | 34.20 | . |
| ATOM | 2310 | CB  | CB  | . | GLU | GLU | A | A | 144 | 144 | . | 4.480  | 25.863 | -19.769 | 1.00 | 54.27 | . |

|      |      |     |     |   |     |     |   |   |     |     |   |        |        |         |      |       |   |
|------|------|-----|-----|---|-----|-----|---|---|-----|-----|---|--------|--------|---------|------|-------|---|
| ATOM | 2311 | CG  | CG  | . | GLU | GLU | A | A | 144 | 144 | . | 5.918  | 25.370 | -19.813 | 1.00 | 55.72 | . |
| ATOM | 2312 | CD  | CD  | . | GLU | GLU | A | A | 144 | 144 | . | 6.499  | 25.332 | -21.212 | 1.00 | 58.85 | . |
| ATOM | 2313 | OE1 | OE1 | . | GLU | GLU | A | A | 144 | 144 | . | 7.609  | 24.782 | -21.362 | 1.00 | 59.37 | . |
| ATOM | 2314 | OE2 | OE2 | . | GLU | GLU | A | A | 144 | 144 | . | 5.857  | 25.846 | -22.156 | 1.00 | 59.38 | . |
| ATOM | 2315 | N   | N   | . | TRP | TRP | A | A | 145 | 145 | . | 3.971  | 26.533 | -16.275 | 1.00 | 33.59 | . |
| ATOM | 2316 | CA  | CA  | . | TRP | TRP | A | A | 145 | 145 | . | 3.914  | 27.565 | -15.255 | 1.00 | 28.16 | . |
| ATOM | 2317 | C   | C   | . | TRP | TRP | A | A | 145 | 145 | . | 4.623  | 28.829 | -15.711 | 1.00 | 30.22 | . |
| ATOM | 2318 | O   | O   | . | TRP | TRP | A | A | 145 | 145 | . | 5.845  | 28.851 | -15.818 | 1.00 | 32.16 | . |
| ATOM | 2319 | CB  | CB  | . | TRP | TRP | A | A | 145 | 145 | . | 4.562  | 27.031 | -13.978 | 1.00 | 35.04 | . |
| ATOM | 2320 | CG  | CG  | . | TRP | TRP | A | A | 145 | 145 | . | 4.308  | 27.836 | -12.748 | 1.00 | 32.61 | . |
| ATOM | 2321 | CD1 | CD1 | . | TRP | TRP | A | A | 145 | 145 | . | 3.571  | 28.982 | -12.645 | 1.00 | 36.35 | . |
| ATOM | 2322 | CD2 | CD2 | . | TRP | TRP | A | A | 145 | 145 | . | 4.788  | 27.546 | -11.433 | 1.00 | 29.98 | . |
| ATOM | 2323 | NE1 | NE1 | . | TRP | TRP | A | A | 145 | 145 | . | 3.565  | 29.423 | -11.340 | 1.00 | 36.35 | . |
| ATOM | 2324 | CE2 | CE2 | . | TRP | TRP | A | A | 145 | 145 | . | 4.304  | 28.560 | -10.574 | 1.00 | 29.32 | . |
| ATOM | 2325 | CE3 | CE3 | . | TRP | TRP | A | A | 145 | 145 | . | 5.584  | 26.525 | -10.895 | 1.00 | 26.81 | . |
| ATOM | 2326 | CZ2 | CZ2 | . | TRP | TRP | A | A | 145 | 145 | . | 4.591  | 28.581 | -9.206  | 1.00 | 25.27 | . |
| ATOM | 2327 | CZ3 | CZ3 | . | TRP | TRP | A | A | 145 | 145 | . | 5.869  | 26.549 | -9.533  | 1.00 | 18.38 | . |
| ATOM | 2328 | CH2 | CH2 | . | TRP | TRP | A | A | 145 | 145 | . | 5.372  | 27.572 | -8.705  | 1.00 | 25.18 | . |
| ATOM | 2329 | N   | N   | . | LEU | LEU | A | A | 146 | 146 | . | 3.847  | 29.878 | -15.979 | 1.00 | 28.93 | . |
| ATOM | 2330 | CA  | CA  | . | LEU | LEU | A | A | 146 | 146 | . | 4.395  | 31.158 | -16.422 | 1.00 | 33.55 | . |
| ATOM | 2331 | C   | C   | . | LEU | LEU | A | A | 146 | 146 | . | 4.501  | 32.099 | -15.224 | 1.00 | 37.58 | . |
| ATOM | 2332 | O   | O   | . | LEU | LEU | A | A | 146 | 146 | . | 3.601  | 32.164 | -14.384 | 1.00 | 38.21 | . |
| ATOM | 2333 | CB  | CB  | . | LEU | LEU | A | A | 146 | 146 | . | 3.489  | 31.785 | -17.487 | 1.00 | 36.54 | . |
| ATOM | 2334 | CG  | CG  | . | LEU | LEU | A | A | 146 | 146 | . | 3.125  | 30.948 | -18.718 | 1.00 | 39.91 | . |
| ATOM | 2335 | CD1 | CD1 | . | LEU | LEU | A | A | 146 | 146 | . | 2.103  | 31.704 | -19.558 | 1.00 | 37.99 | . |
| ATOM | 2336 | CD2 | CD2 | . | LEU | LEU | A | A | 146 | 146 | . | 4.371  | 30.638 | -19.535 | 1.00 | 38.87 | . |
| ATOM | 2337 | N   | N   | . | GLU | GLU | A | A | 147 | 147 | . | 5.605  | 32.830 | -15.151 | 1.00 | 35.71 | . |
| ATOM | 2338 | CA  | CA  | . | GLU | GLU | A | A | 147 | 147 | . | 5.842  | 33.755 | -14.054 | 1.00 | 33.26 | . |
| ATOM | 2339 | C   | C   | . | GLU | GLU | A | A | 147 | 147 | . | 4.837  | 34.905 | -14.015 | 1.00 | 40.18 | . |
| ATOM | 2340 | O   | O   | . | GLU | GLU | A | A | 147 | 147 | . | 4.712  | 35.594 | -13.002 | 1.00 | 31.21 | . |
| ATOM | 2341 | CB  | CB  | . | GLU | GLU | A | A | 147 | 147 | . | 7.261  | 34.313 | -14.165 | 1.00 | 43.38 | . |
| ATOM | 2342 | CG  | CG  | . | GLU | GLU | A | A | 147 | 147 | . | 7.690  | 35.179 | -12.997 | 1.00 | 54.33 | . |
| ATOM | 2343 | CD  | CD  | . | GLU | GLU | A | A | 147 | 147 | . | 9.182  | 35.441 | -13.002 | 1.00 | 57.84 | . |
| ATOM | 2344 | OE1 | OE1 | . | GLU | GLU | A | A | 147 | 147 | . | 9.944  | 34.458 | -13.128 | 1.00 | 61.08 | . |
| ATOM | 2345 | OE2 | OE2 | . | GLU | GLU | A | A | 147 | 147 | . | 9.589  | 36.616 | -12.873 | 1.00 | 59.41 | . |
| ATOM | 2346 | N   | N   | . | SER | SER | A | A | 148 | 148 | . | 4.112  | 35.093 | -15.114 | 1.00 | 38.98 | . |
| ATOM | 2347 | CA  | CA  | . | SER | SER | A | A | 148 | 148 | . | 3.141  | 36.180 | -15.228 | 1.00 | 42.25 | . |
| ATOM | 2348 | C   | C   | . | SER | SER | A | A | 148 | 148 | . | 1.700  | 35.786 | -14.925 | 1.00 | 43.42 | . |
| ATOM | 2349 | O   | O   | . | SER | SER | A | A | 148 | 148 | . | 0.789  | 36.604 | -15.057 | 1.00 | 45.87 | . |
| ATOM | 2350 | CB  | CB  | . | SER | SER | A | A | 148 | 148 | . | 3.191  | 36.756 | -16.639 | 1.00 | 46.08 | . |
| ATOM | 2351 | OG  | OG  | . | SER | SER | A | A | 148 | 148 | . | 2.737  | 35.789 | -17.572 | 1.00 | 45.05 | . |
| ATOM | 2352 | N   | N   | . | GLU | GLU | A | A | 149 | 149 | . | 1.477  | 34.546 | -14.522 | 1.00 | 37.15 | . |
| ATOM | 2353 | CA  | CA  | . | GLU | GLU | A | A | 149 | 149 | . | 0.115  | 34.128 | -14.257 | 1.00 | 35.84 | . |
| ATOM | 2354 | C   | C   | . | GLU | GLU | A | A | 149 | 149 | . | -0.147 | 33.851 | -12.790 | 1.00 | 35.39 | . |
| ATOM | 2355 | O   | O   | . | GLU | GLU | A | A | 149 | 149 | . | 0.781  | 33.659 | -12.001 | 1.00 | 30.63 | . |
| ATOM | 2356 | CB  | CB  | . | GLU | GLU | A | A | 149 | 149 | . | -0.216 | 32.886 | -15.083 | 1.00 | 39.34 | . |
| ATOM | 2357 | CG  | CG  | . | GLU | GLU | A | A | 149 | 149 | . | 0.354  | 31.597 | -14.528 | 1.00 | 54.82 | . |
| ATOM | 2358 | CD  | CD  | . | GLU | GLU | A | A | 149 | 149 | . | 0.320  | 30.471 | -15.541 | 1.00 | 63.46 | . |
| ATOM | 2359 | OE1 | OE1 | . | GLU | GLU | A | A | 149 | 149 | . | 1.243  | 30.406 | -16.379 | 1.00 | 60.83 | . |
| ATOM | 2360 | OE2 | OE2 | . | GLU | GLU | A | A | 149 | 149 | . | -0.633 | 29.661 | -15.509 | 1.00 | 64.54 | . |
| ATOM | 2361 | N   | N   | . | GLN | GLN | A | A | 150 | 150 | . | -1.422 | 33.854 | -12.424 | 1.00 | 31.44 | . |
| ATOM | 2362 | CA  | CA  | . | GLN | GLN | A | A | 150 | 150 | . | -1.788 | 33.561 | -11.058 | 1.00 | 30.28 | . |
| ATOM | 2363 | C   | C   | . | GLN | GLN | A | A | 150 | 150 | . | -1.933 | 32.053 | -11.039 | 1.00 | 32.33 | . |
| ATOM | 2364 | O   | O   | . | GLN | GLN | A | A | 150 | 150 | . | -2.091 | 31.429 | -12.090 | 1.00 | 33.78 | . |
| ATOM | 2365 | CB  | CB  | . | GLN | GLN | A | A | 150 | 150 | . | -3.108 | 34.231 | -10.677 | 1.00 | 30.18 | . |
| ATOM | 2366 | CG  | CG  | . | GLN | GLN | A | A | 150 | 150 | . | -3.093 | 35.736 | -10.829 | 1.00 | 28.97 | . |
| ATOM | 2367 | CD  | CD  | . | GLN | GLN | A | A | 150 | 150 | . | -4.005 | 36.435 | -9.845  | 1.00 | 22.84 | . |

|      |      |     |     |   |     |     |   |   |     |     |   |        |        |         |      |       |   |
|------|------|-----|-----|---|-----|-----|---|---|-----|-----|---|--------|--------|---------|------|-------|---|
| ATOM | 2368 | OE1 | OE1 | . | GLN | GLN | A | A | 150 | 150 | . | -5.049 | 35.911 | -9.465  | 1.00 | 30.20 | . |
| ATOM | 2369 | NE2 | NE2 | . | GLN | GLN | A | A | 150 | 150 | . | -3.617 | 37.635 | -9.432  | 1.00 | 31.81 | . |
| ATOM | 2370 | N   | N   | . | PHE | PHE | A | A | 151 | 151 | . | -1.875 | 31.466 | -9.853  | 1.00 | 20.93 | . |
| ATOM | 2371 | CA  | CA  | . | PHE | PHE | A | A | 151 | 151 | . | -1.982 | 30.028 | -9.736  | 1.00 | 24.48 | . |
| ATOM | 2372 | C   | C   | . | PHE | PHE | A | A | 151 | 151 | . | -2.422 | 29.640 | -8.341  | 1.00 | 24.54 | . |
| ATOM | 2373 | O   | O   | . | PHE | PHE | A | A | 151 | 151 | . | -2.466 | 30.472 | -7.436  | 1.00 | 23.90 | . |
| ATOM | 2374 | CB  | CB  | . | PHE | PHE | A | A | 151 | 151 | . | -0.618 | 29.380 | -10.024 | 1.00 | 24.29 | . |
| ATOM | 2375 | CG  | CG  | . | PHE | PHE | A | A | 151 | 151 | . | 0.468  | 29.775 | -9.043  | 1.00 | 21.96 | . |
| ATOM | 2376 | CD1 | CD1 | . | PHE | PHE | A | A | 151 | 151 | . | 1.170  | 30.970 | -9.195  | 1.00 | 31.49 | . |
| ATOM | 2377 | CD2 | CD2 | . | PHE | PHE | A | A | 151 | 151 | . | 0.765  | 28.965 | -7.949  | 1.00 | 21.17 | . |
| ATOM | 2378 | CE1 | CE1 | . | PHE | PHE | A | A | 151 | 151 | . | 2.155  | 31.355 | -8.265  | 1.00 | 23.83 | . |
| ATOM | 2379 | CE2 | CE2 | . | PHE | PHE | A | A | 151 | 151 | . | 1.742  | 29.341 | -7.019  | 1.00 | 17.41 | . |
| ATOM | 2380 | CZ  | CZ  | . | PHE | PHE | A | A | 151 | 151 | . | 2.435  | 30.534 | -7.176  | 1.00 | 16.57 | . |
| ATOM | 2381 | N   | N   | . | LYS | LYS | A | A | 152 | 152 | . | -2.769 | 28.372 | -8.180  | 1.00 | 20.08 | . |
| ATOM | 2382 | CA  | CA  | . | LYS | LYS | A | A | 152 | 152 | . | -3.138 | 27.853 | -6.880  | 1.00 | 21.94 | . |
| ATOM | 2383 | C   | C   | . | LYS | LYS | A | A | 152 | 152 | . | -2.202 | 26.677 | -6.635  | 1.00 | 21.91 | . |
| ATOM | 2384 | O   | O   | . | LYS | LYS | A | A | 152 | 152 | . | -1.544 | 26.188 | -7.563  | 1.00 | 22.08 | . |
| ATOM | 2385 | CB  | CB  | . | LYS | LYS | A | A | 152 | 152 | . | -4.594 | 27.382 | -6.865  | 1.00 | 33.16 | . |
| ATOM | 2386 | CG  | CG  | . | LYS | LYS | A | A | 152 | 152 | . | -5.603 | 28.512 | -6.930  | 1.00 | 25.45 | . |
| ATOM | 2387 | CD  | CD  | . | LYS | LYS | A | A | 152 | 152 | . | -7.018 | 27.989 | -7.035  | 1.00 | 41.56 | . |
| ATOM | 2388 | CE  | CE  | . | LYS | LYS | A | A | 152 | 152 | . | -7.474 | 27.896 | -8.488  | 1.00 | 47.49 | . |
| ATOM | 2389 | NZ  | NZ  | . | LYS | LYS | A | A | 152 | 152 | . | -7.620 | 29.243 | -9.118  | 1.00 | 48.62 | . |
| ATOM | 2390 | N   | N   | . | LEU | LEU | A | A | 153 | 153 | . | -2.120 | 26.241 | -5.388  | 1.00 | 15.13 | . |
| ATOM | 2391 | CA  | CA  | . | LEU | LEU | A | A | 153 | 153 | . | -1.288 | 25.105 | -5.032  | 1.00 | 17.30 | . |
| ATOM | 2392 | C   | C   | . | LEU | LEU | A | A | 153 | 153 | . | -2.165 | 24.176 | -4.230  | 1.00 | 13.83 | . |
| ATOM | 2393 | O   | O   | . | LEU | LEU | A | A | 153 | 153 | . | -2.640 | 24.529 | -3.152  | 1.00 | 22.19 | . |
| ATOM | 2394 | CB  | CB  | . | LEU | LEU | A | A | 153 | 153 | . | -0.082 | 25.531 | -4.191  | 1.00 | 16.98 | . |
| ATOM | 2395 | CG  | CG  | . | LEU | LEU | A | A | 153 | 153 | . | 1.087  | 26.212 | -4.902  | 1.00 | 20.49 | . |
| ATOM | 2396 | CD1 | CD1 | . | LEU | LEU | A | A | 153 | 153 | . | 2.138  | 26.596 | -3.855  | 1.00 | 20.54 | . |
| ATOM | 2397 | CD2 | CD2 | . | LEU | LEU | A | A | 153 | 153 | . | 1.698  | 25.281 | -5.945  | 1.00 | 19.18 | . |
| ATOM | 2398 | N   | N   | . | ARG | ARG | A | A | 154 | 154 | . | -2.378 | 22.981 | -4.759  | 1.00 | 14.51 | . |
| ATOM | 2399 | CA  | CA  | . | ARG | ARG | A | A | 154 | 154 | . | -3.224 | 22.016 | -4.085  | 1.00 | 18.83 | . |
| ATOM | 2400 | C   | C   | . | ARG | ARG | A | A | 154 | 154 | . | -2.398 | 20.890 | -3.482  | 1.00 | 17.50 | . |
| ATOM | 2401 | O   | O   | . | ARG | ARG | A | A | 154 | 154 | . | -1.681 | 20.192 | -4.195  | 1.00 | 18.72 | . |
| ATOM | 2402 | CB  | CB  | . | ARG | ARG | A | A | 154 | 154 | . | -4.237 | 21.452 | -5.085  | 1.00 | 21.15 | . |
| ATOM | 2403 | CG  | CG  | . | ARG | ARG | A | A | 154 | 154 | . | -5.421 | 20.768 | -4.448  | 1.00 | 23.17 | . |
| ATOM | 2404 | CD  | CD  | . | ARG | ARG | A | A | 154 | 154 | . | -6.440 | 20.327 | -5.512  | 1.00 | 24.51 | . |
| ATOM | 2405 | NE  | NE  | . | ARG | ARG | A | A | 154 | 154 | . | -7.684 | 19.871 | -4.901  | 1.00 | 26.09 | . |
| ATOM | 2406 | CZ  | CZ  | . | ARG | ARG | A | A | 154 | 154 | . | -8.759 | 19.481 | -5.583  | 1.00 | 30.30 | . |
| ATOM | 2407 | NH1 | NH1 | . | ARG | ARG | A | A | 154 | 154 | . | -8.749 | 19.485 | -6.910  | 1.00 | 21.54 | . |
| ATOM | 2408 | NH2 | NH2 | . | ARG | ARG | A | A | 154 | 154 | . | -9.847 | 19.098 | -4.936  | 1.00 | 24.59 | . |
| ATOM | 2409 | N   | N   | . | HIS | HIS | A | A | 155 | 155 | . | -2.501 | 20.714 | -2.168  | 1.00 | 15.47 | . |
| ATOM | 2410 | CA  | CA  | . | HIS | HIS | A | A | 155 | 155 | . | -1.750 | 19.666 | -1.489  | 1.00 | 17.47 | . |
| ATOM | 2411 | C   | C   | . | HIS | HIS | A | A | 155 | 155 | . | -2.115 | 18.323 | -2.114  | 1.00 | 29.13 | . |
| ATOM | 2412 | O   | O   | . | HIS | HIS | A | A | 155 | 155 | . | -3.286 | 17.934 | -2.140  | 1.00 | 23.05 | . |
| ATOM | 2413 | CB  | CB  | . | HIS | HIS | A | A | 155 | 155 | . | -2.077 | 19.652 | -0.001  | 1.00 | 20.13 | . |
| ATOM | 2414 | CG  | CG  | . | HIS | HIS | A | A | 155 | 155 | . | -1.115 | 18.851 | 0.819   | 1.00 | 28.32 | . |
| ATOM | 2415 | ND1 | ND1 | . | HIS | HIS | A | A | 155 | 155 | . | -1.522 | 17.867 | 1.696   | 1.00 | 26.70 | . |
| ATOM | 2416 | CD2 | CD2 | . | HIS | HIS | A | A | 155 | 155 | . | 0.235  | 18.909 | 0.918   | 1.00 | 18.85 | . |
| ATOM | 2417 | CE1 | CE1 | . | HIS | HIS | A | A | 155 | 155 | . | -0.464 | 17.356 | 2.302   | 1.00 | 26.66 | . |
| ATOM | 2418 | NE2 | NE2 | . | HIS | HIS | A | A | 155 | 155 | . | 0.614  | 17.971 | 1.848   | 1.00 | 24.06 | . |
| ATOM | 2419 | N   | N   | . | ALA | ALA | A | A | 156 | 156 | . | -1.105 | 17.620 | -2.610  | 1.00 | 20.80 | . |
| ATOM | 2420 | CA  | CA  | . | ALA | ALA | A | A | 156 | 156 | . | -1.314 | 16.341 | -3.263  | 1.00 | 26.82 | . |
| ATOM | 2421 | C   | C   | . | ALA | ALA | A | A | 156 | 156 | . | -1.967 | 15.272 | -2.392  | 1.00 | 31.22 | . |
| ATOM | 2422 | O   | O   | . | ALA | ALA | A | A | 156 | 156 | . | -2.929 | 14.630 | -2.813  | 1.00 | 26.75 | . |
| ATOM | 2423 | CB  | CB  | . | ALA | ALA | A | A | 156 | 156 | . | 0.005  | 15.825 | -3.807  | 1.00 | 22.75 | . |
| ATOM | 2424 | N   | N   | . | VAL | VAL | A | A | 157 | 157 | . | -1.451 | 15.082 | -1.183  | 1.00 | 24.58 | . |

|      |      |     |     |   |     |     |   |   |     |     |   |        |        |        |      |       |   |
|------|------|-----|-----|---|-----|-----|---|---|-----|-----|---|--------|--------|--------|------|-------|---|
| ATOM | 2425 | CA  | CA  | . | VAL | VAL | A | A | 157 | 157 | . | -1.978 | 14.057 | -0.296 | 1.00 | 28.01 | . |
| ATOM | 2426 | C   | C   | . | VAL | VAL | A | A | 157 | 157 | . | -3.366 | 14.316 | 0.283  | 1.00 | 35.31 | . |
| ATOM | 2427 | O   | O   | . | VAL | VAL | A | A | 157 | 157 | . | -4.182 | 13.398 | 0.351  | 1.00 | 28.08 | . |
| ATOM | 2428 | CB  | CB  | . | VAL | VAL | A | A | 157 | 157 | . | -0.990 | 13.774 | 0.852  | 1.00 | 24.27 | . |
| ATOM | 2429 | CG1 | CG1 | . | VAL | VAL | A | A | 157 | 157 | . | -1.615 | 12.839 | 1.880  | 1.00 | 30.76 | . |
| ATOM | 2430 | CG2 | CG2 | . | VAL | VAL | A | A | 157 | 157 | . | 0.279  | 13.156 | 0.286  | 1.00 | 22.61 | . |
| ATOM | 2431 | N   | N   | . | THR | THR | A | A | 158 | 158 | . | -3.645 | 15.551 | 0.698  | 1.00 | 35.67 | . |
| ATOM | 2432 | CA  | CA  | . | THR | THR | A | A | 158 | 158 | . | -4.950 | 15.870 | 1.277  | 1.00 | 30.59 | . |
| ATOM | 2433 | C   | C   | . | THR | THR | A | A | 158 | 158 | . | -5.911 | 16.580 | 0.326  | 1.00 | 29.07 | . |
| ATOM | 2434 | O   | O   | . | THR | THR | A | A | 158 | 158 | . | -7.123 | 16.534 | 0.518  | 1.00 | 34.19 | . |
| ATOM | 2435 | CB  | CB  | . | THR | THR | A | A | 158 | 158 | . | -4.806 | 16.755 | 2.522  | 1.00 | 29.26 | . |
| ATOM | 2436 | OG1 | OG1 | . | THR | THR | A | A | 158 | 158 | . | -4.178 | 17.986 | 2.151  | 1.00 | 28.82 | . |
| ATOM | 2437 | CG2 | CG2 | . | THR | THR | A | A | 158 | 158 | . | -3.980 | 16.059 | 3.583  | 1.00 | 26.59 | . |
| ATOM | 2438 | N   | N   | . | GLY | GLY | A | A | 159 | 159 | . | -5.376 | 17.249 | -0.688 | 1.00 | 29.90 | . |
| ATOM | 2439 | CA  | CA  | . | GLY | GLY | A | A | 159 | 159 | . | -6.225 | 17.957 | -1.632 | 1.00 | 26.32 | . |
| ATOM | 2440 | C   | C   | . | GLY | GLY | A | A | 159 | 159 | . | -6.556 | 19.384 | -1.222 | 1.00 | 26.34 | . |
| ATOM | 2441 | O   | O   | . | GLY | GLY | A | A | 159 | 159 | . | -7.235 | 20.107 | -1.956 | 1.00 | 31.61 | . |
| ATOM | 2442 | N   | N   | . | SER | SER | A | A | 160 | 160 | . | -6.076 | 19.798 | -0.053 | 1.00 | 28.60 | . |
| ATOM | 2443 | CA  | CA  | . | SER | SER | A | A | 160 | 160 | . | -6.341 | 21.144 | 0.443  | 1.00 | 23.42 | . |
| ATOM | 2444 | C   | C   | . | SER | SER | A | A | 160 | 160 | . | -5.551 | 22.180 | -0.332 | 1.00 | 28.84 | . |
| ATOM | 2445 | O   | O   | . | SER | SER | A | A | 160 | 160 | . | -4.408 | 21.939 | -0.729 | 1.00 | 23.36 | . |
| ATOM | 2446 | CB  | CB  | . | SER | SER | A | A | 160 | 160 | . | -5.987 | 21.247 | 1.927  | 1.00 | 32.10 | . |
| ATOM | 2447 | OG  | OG  | . | SER | SER | A | A | 160 | 160 | . | -6.621 | 20.219 | 2.667  | 1.00 | 31.58 | . |
| ATOM | 2448 | N   | N   | . | TYR | TYR | A | A | 161 | 161 | . | -6.171 | 23.336 | -0.543 | 1.00 | 23.65 | . |
| ATOM | 2449 | CA  | CA  | . | TYR | TYR | A | A | 161 | 161 | . | -5.543 | 24.425 | -1.263 | 1.00 | 17.93 | . |
| ATOM | 2450 | C   | C   | . | TYR | TYR | A | A | 161 | 161 | . | -4.767 | 25.308 | -0.291 | 1.00 | 23.69 | . |
| ATOM | 2451 | O   | O   | . | TYR | TYR | A | A | 161 | 161 | . | -5.220 | 25.567 | 0.828  | 1.00 | 21.29 | . |
| ATOM | 2452 | CB  | CB  | . | TYR | TYR | A | A | 161 | 161 | . | -6.607 | 25.260 | -1.964 | 1.00 | 21.44 | . |
| ATOM | 2453 | CG  | CG  | . | TYR | TYR | A | A | 161 | 161 | . | -7.327 | 24.533 | -3.076 | 1.00 | 30.77 | . |
| ATOM | 2454 | CD1 | CD1 | . | TYR | TYR | A | A | 161 | 161 | . | -6.779 | 24.458 | -4.353 | 1.00 | 21.42 | . |
| ATOM | 2455 | CD2 | CD2 | . | TYR | TYR | A | A | 161 | 161 | . | -8.563 | 23.918 | -2.851 | 1.00 | 32.94 | . |
| ATOM | 2456 | CE1 | CE1 | . | TYR | TYR | A | A | 161 | 161 | . | -7.440 | 23.793 | -5.384 | 1.00 | 23.20 | . |
| ATOM | 2457 | CE2 | CE2 | . | TYR | TYR | A | A | 161 | 161 | . | -9.234 | 23.247 | -3.878 | 1.00 | 31.54 | . |
| ATOM | 2458 | CZ  | CZ  | . | TYR | TYR | A | A | 161 | 161 | . | -8.665 | 23.189 | -5.141 | 1.00 | 28.73 | . |
| ATOM | 2459 | OH  | OH  | . | TYR | TYR | A | A | 161 | 161 | . | -9.312 | 22.521 | -6.165 | 1.00 | 35.08 | . |
| ATOM | 2460 | N   | N   | . | LEU | LEU | A | A | 162 | 162 | . | -3.590 | 25.754 | -0.709 | 1.00 | 19.19 | . |
| ATOM | 2461 | CA  | CA  | . | LEU | LEU | A | A | 162 | 162 | . | -2.785 | 26.634 | 0.134  | 1.00 | 18.10 | . |
| ATOM | 2462 | C   | C   | . | LEU | LEU | A | A | 162 | 162 | . | -3.559 | 27.948 | 0.116  | 1.00 | 13.12 | . |
| ATOM | 2463 | O   | O   | . | LEU | LEU | A | A | 162 | 162 | . | -3.795 | 28.502 | -0.956 | 1.00 | 15.98 | . |
| ATOM | 2464 | CB  | CB  | . | LEU | LEU | A | A | 162 | 162 | . | -1.396 | 26.830 | -0.486 | 1.00 | 10.84 | . |
| ATOM | 2465 | CG  | CG  | . | LEU | LEU | A | A | 162 | 162 | . | -0.439 | 27.768 | 0.253  | 1.00 | 11.79 | . |
| ATOM | 2466 | CD1 | CD1 | . | LEU | LEU | A | A | 162 | 162 | . | -0.038 | 27.144 | 1.577  | 1.00 | 13.94 | . |
| ATOM | 2467 | CD2 | CD2 | . | LEU | LEU | A | A | 162 | 162 | . | 0.786  | 28.018 | -0.615 | 1.00 | 13.26 | . |
| ATOM | 2468 | N   | N   | . | SER | SER | A | A | 163 | 163 | . | -3.965 | 28.441 | 1.283  | 1.00 | 17.70 | . |
| ATOM | 2469 | CA  | CA  | . | SER | SER | A | A | 163 | 163 | . | -4.748 | 29.676 | 1.321  | 1.00 | 19.54 | . |
| ATOM | 2470 | C   | C   | . | SER | SER | A | A | 163 | 163 | . | -4.541 | 30.507 | 2.572  | 1.00 | 18.67 | . |
| ATOM | 2471 | O   | O   | . | SER | SER | A | A | 163 | 163 | . | -4.176 | 29.985 | 3.625  | 1.00 | 20.90 | . |
| ATOM | 2472 | CB  | CB  | . | SER | SER | A | A | 163 | 163 | . | -6.248 | 29.357 | 1.236  | 1.00 | 20.70 | . |
| ATOM | 2473 | OG  | OG  | . | SER | SER | A | A | 163 | 163 | . | -6.551 | 28.450 | 0.192  | 1.00 | 24.20 | . |
| ATOM | 2474 | N   | N   | . | LEU | LEU | A | A | 164 | 164 | . | -4.771 | 31.809 | 2.445  | 1.00 | 21.67 | . |
| ATOM | 2475 | CA  | CA  | . | LEU | LEU | A | A | 164 | 164 | . | -4.691 | 32.689 | 3.599  | 1.00 | 19.45 | . |
| ATOM | 2476 | C   | C   | . | LEU | LEU | A | A | 164 | 164 | . | -6.078 | 32.529 | 4.225  | 1.00 | 24.69 | . |
| ATOM | 2477 | O   | O   | . | LEU | LEU | A | A | 164 | 164 | . | -7.096 | 32.646 | 3.532  | 1.00 | 29.08 | . |
| ATOM | 2478 | CB  | CB  | . | LEU | LEU | A | A | 164 | 164 | . | -4.470 | 34.143 | 3.170  | 1.00 | 20.89 | . |
| ATOM | 2479 | CG  | CG  | . | LEU | LEU | A | A | 164 | 164 | . | -3.128 | 34.460 | 2.502  | 1.00 | 22.75 | . |
| ATOM | 2480 | CD1 | CD1 | . | LEU | LEU | A | A | 164 | 164 | . | -2.985 | 35.969 | 2.325  | 1.00 | 18.25 | . |
| ATOM | 2481 | CD2 | CD2 | . | LEU | LEU | A | A | 164 | 164 | . | -1.994 | 33.922 | 3.363  | 1.00 | 24.82 | . |

|      |      |     |     |   |     |     |   |   |     |     |   |         |        |        |      |       |   |
|------|------|-----|-----|---|-----|-----|---|---|-----|-----|---|---------|--------|--------|------|-------|---|
| ATOM | 2482 | N   | N   | . | SER | SER | A | A | 165 | 165 | . | -6.117  | 32.224 | 5.515  | 1.00 | 23.87 | . |
| ATOM | 2483 | CA  | CA  | . | SER | SER | A | A | 165 | 165 | . | -7.381  | 32.035 | 6.222  | 1.00 | 28.68 | . |
| ATOM | 2484 | C   | C   | . | SER | SER | A | A | 165 | 165 | . | -8.107  | 33.357 | 6.399  | 1.00 | 32.54 | . |
| ATOM | 2485 | O   | O   | . | SER | SER | A | A | 165 | 165 | . | -9.321  | 33.386 | 6.584  | 1.00 | 33.83 | . |
| ATOM | 2486 | CB  | CB  | . | SER | SER | A | A | 165 | 165 | . | -7.129  | 31.432 | 7.601  | 1.00 | 22.88 | . |
| ATOM | 2487 | OG  | OG  | . | SER | SER | A | A | 165 | 165 | . | -6.500  | 32.384 | 8.436  | 1.00 | 23.79 | . |
| ATOM | 2488 | N   | N   | . | GLY | GLY | A | A | 166 | 166 | . | -7.353  | 34.451 | 6.346  | 1.00 | 34.31 | . |
| ATOM | 2489 | CA  | CA  | . | GLY | GLY | A | A | 166 | 166 | . | -7.941  | 35.766 | 6.521  | 1.00 | 34.98 | . |
| ATOM | 2490 | C   | C   | . | GLY | GLY | A | A | 166 | 166 | . | -7.682  | 36.246 | 7.936  | 1.00 | 36.96 | . |
| ATOM | 2491 | O   | O   | . | GLY | GLY | A | A | 166 | 166 | . | -7.992  | 37.380 | 8.296  | 1.00 | 37.58 | . |
| ATOM | 2492 | N   | N   | . | GLN | GLN | A | A | 167 | 167 | . | -7.111  | 35.363 | 8.747  | 1.00 | 38.43 | . |
| ATOM | 2493 | CA  | CA  | . | GLN | GLN | A | A | 167 | 167 | . | -6.784  | 35.690 | 10.124 | 1.00 | 34.20 | . |
| ATOM | 2494 | C   | C   | . | GLN | GLN | A | A | 167 | 167 | . | -5.351  | 36.188 | 10.196 | 1.00 | 33.80 | . |
| ATOM | 2495 | O   | O   | . | GLN | GLN | A | A | 167 | 167 | . | -4.536  | 35.887 | 9.325  | 1.00 | 33.53 | . |
| ATOM | 2496 | CB  | CB  | . | GLN | GLN | A | A | 167 | 167 | . | -6.936  | 34.454 | 11.013 | 1.00 | 41.70 | . |
| ATOM | 2497 | CG  | CG  | . | GLN | GLN | A | A | 167 | 167 | . | -8.373  | 34.025 | 11.223 | 1.00 | 39.98 | . |
| ATOM | 2498 | CD  | CD  | . | GLN | GLN | A | A | 167 | 167 | . | -9.194  | 35.120 | 11.870 | 1.00 | 44.06 | . |
| ATOM | 2499 | OE1 | OE1 | . | GLN | GLN | A | A | 167 | 167 | . | -8.883  | 35.576 | 12.971 | 1.00 | 41.63 | . |
| ATOM | 2500 | NE2 | NE2 | . | GLN | GLN | A | A | 167 | 167 | . | -10.243 | 35.556 | 11.185 | 1.00 | 42.38 | . |
| ATOM | 2501 | N   | N   | . | GLN | GLN | A | A | 168 | 168 | . | -5.053  | 36.954 | 11.238 | 1.00 | 32.46 | . |
| ATOM | 2502 | CA  | CA  | . | GLN | GLN | A | A | 168 | 168 | . | -3.714  | 37.488 | 11.448 | 1.00 | 28.84 | . |
| ATOM | 2503 | C   | C   | . | GLN | GLN | A | A | 168 | 168 | . | -3.239  | 37.090 | 12.840 | 1.00 | 34.11 | . |
| ATOM | 2504 | O   | O   | . | GLN | GLN | A | A | 168 | 168 | . | -4.047  | 36.943 | 13.760 | 1.00 | 36.68 | . |
| ATOM | 2505 | CB  | CB  | . | GLN | GLN | A | A | 168 | 168 | . | -3.719  | 39.011 | 11.328 | 1.00 | 30.89 | . |
| ATOM | 2506 | CG  | CG  | . | GLN | GLN | A | A | 168 | 168 | . | -3.897  | 39.539 | 9.919  | 1.00 | 28.20 | . |
| ATOM | 2507 | CD  | CD  | . | GLN | GLN | A | A | 168 | 168 | . | -3.769  | 41.054 | 9.854  | 1.00 | 40.50 | . |
| ATOM | 2508 | OE1 | OE1 | . | GLN | GLN | A | A | 168 | 168 | . | -2.911  | 41.643 | 10.514 | 1.00 | 28.64 | . |
| ATOM | 2509 | NE2 | NE2 | . | GLN | GLN | A | A | 168 | 168 | . | -4.613  | 41.689 | 9.047  | 1.00 | 36.77 | . |
| ATOM | 2510 | N   | N   | . | PHE | PHE | A | A | 169 | 169 | . | -1.932  | 36.917 | 12.992 | 1.00 | 24.96 | . |
| ATOM | 2511 | CA  | CA  | . | PHE | PHE | A | A | 169 | 169 | . | -1.363  | 36.546 | 14.277 | 1.00 | 27.15 | . |
| ATOM | 2512 | C   | C   | . | PHE | PHE | A | A | 169 | 169 | . | -1.045  | 37.774 | 15.109 | 1.00 | 33.71 | . |
| ATOM | 2513 | O   | O   | . | PHE | PHE | A | A | 169 | 169 | . | -1.000  | 38.897 | 14.598 | 1.00 | 24.98 | . |
| ATOM | 2514 | CB  | CB  | . | PHE | PHE | A | A | 169 | 169 | . | -0.065  | 35.771 | 14.092 | 1.00 | 25.98 | . |
| ATOM | 2515 | CG  | CG  | . | PHE | PHE | A | A | 169 | 169 | . | -0.246  | 34.401 | 13.527 | 1.00 | 27.91 | . |
| ATOM | 2516 | CD1 | CD1 | . | PHE | PHE | A | A | 169 | 169 | . | -0.794  | 33.386 | 14.300 | 1.00 | 28.34 | . |
| ATOM | 2517 | CD2 | CD2 | . | PHE | PHE | A | A | 169 | 169 | . | 0.146   | 34.118 | 12.223 | 1.00 | 27.44 | . |
| ATOM | 2518 | CE1 | CE1 | . | PHE | PHE | A | A | 169 | 169 | . | -0.951  | 32.105 | 13.788 | 1.00 | 22.98 | . |
| ATOM | 2519 | CE2 | CE2 | . | PHE | PHE | A | A | 169 | 169 | . | -0.006  | 32.835 | 11.697 | 1.00 | 32.23 | . |
| ATOM | 2520 | CZ  | CZ  | . | PHE | PHE | A | A | 169 | 169 | . | -0.557  | 31.827 | 12.484 | 1.00 | 34.10 | . |
| ATOM | 2521 | N   | N   | . | GLY | GLY | A | A | 170 | 170 | . | -0.821  | 37.534 | 16.398 | 1.00 | 35.76 | . |
| ATOM | 2522 | CA  | CA  | . | GLY | GLY | A | A | 170 | 170 | . | -0.449  | 38.591 | 17.316 | 1.00 | 27.14 | . |
| ATOM | 2523 | C   | C   | . | GLY | GLY | A | A | 170 | 170 | . | 1.017   | 38.323 | 17.587 | 1.00 | 34.55 | . |
| ATOM | 2524 | O   | O   | . | GLY | GLY | A | A | 170 | 170 | . | 1.647   | 37.575 | 16.835 | 1.00 | 27.88 | . |
| ATOM | 2525 | N   | N   | . | ARG | ARG | A | A | 171 | 171 | . | 1.570   | 38.907 | 18.645 | 1.00 | 32.53 | . |
| ATOM | 2526 | CA  | CA  | . | ARG | ARG | A | A | 171 | 171 | . | 2.979   | 38.691 | 18.976 | 1.00 | 29.52 | . |
| ATOM | 2527 | C   | C   | . | ARG | ARG | A | A | 171 | 171 | . | 3.225   | 37.192 | 19.147 | 1.00 | 2.79  | . |
| ATOM | 2528 | O   | O   | . | ARG | ARG | A | A | 171 | 171 | . | 2.304   | 36.442 | 19.462 | 1.00 | 33.34 | . |
| ATOM | 2529 | CB  | CB  | . | ARG | ARG | A | A | 171 | 171 | . | 3.334   | 39.416 | 20.275 | 1.00 | 33.63 | . |
| ATOM | 2530 | CG  | CG  | . | ARG | ARG | A | A | 171 | 171 | . | 2.895   | 38.687 | 21.539 | 1.00 | 41.53 | . |
| ATOM | 2531 | CD  | CD  | . | ARG | ARG | A | A | 171 | 171 | . | 1.399   | 38.403 | 21.535 | 1.00 | 57.40 | . |
| ATOM | 2532 | NE  | NE  | . | ARG | ARG | A | A | 171 | 171 | . | 0.606   | 39.624 | 21.411 | 1.00 | 65.82 | . |
| ATOM | 2533 | CZ  | CZ  | . | ARG | ARG | A | A | 171 | 171 | . | 0.687   | 40.655 | 22.249 | 1.00 | 70.52 | . |
| ATOM | 2534 | NH1 | NH1 | . | ARG | ARG | A | A | 171 | 171 | . | 1.528   | 40.615 | 23.275 | 1.00 | 65.83 | . |
| ATOM | 2535 | NH2 | NH2 | . | ARG | ARG | A | A | 171 | 171 | . | -0.080  | 41.722 | 22.068 | 1.00 | 71.20 | . |
| ATOM | 2536 | N   | N   | . | PRO | PRO | A | A | 172 | 172 | . | 4.471   | 36.734 | 18.953 | 1.00 | 26.19 | . |
| ATOM | 2537 | CA  | CA  | . | PRO | PRO | A | A | 172 | 172 | . | 5.684   | 37.472 | 18.589 | 1.00 | 26.84 | . |
| ATOM | 2538 | C   | C   | . | PRO | PRO | A | A | 172 | 172 | . | 5.826   | 37.712 | 17.086 | 1.00 | 25.46 | . |



|      |      |     |     |   |     |     |   |   |     |     |   |        |        |        |      |       |   |
|------|------|-----|-----|---|-----|-----|---|---|-----|-----|---|--------|--------|--------|------|-------|---|
| ATOM | 2539 | O   | O   | . | PRO | PRO | A | A | 172 | 172 | . | 6.896  | 38.097 | 16.615 | 1.00 | 28.10 | . |
| ATOM | 2540 | CB  | CB  | . | PRO | PRO | A | A | 172 | 172 | . | 6.789  | 36.570 | 19.114 | 1.00 | 34.21 | . |
| ATOM | 2541 | CG  | CG  | . | PRO | PRO | A | A | 172 | 172 | . | 6.236  | 35.211 | 18.798 | 1.00 | 28.42 | . |
| ATOM | 2542 | CD  | CD  | . | PRO | PRO | A | A | 172 | 172 | . | 4.797  | 35.327 | 19.255 | 1.00 | 30.70 | . |
| ATOM | 2543 | N   | N   | . | ILE | ILE | A | A | 173 | 173 | . | 4.750  | 37.472 | 16.341 | 1.00 | 24.66 | . |
| ATOM | 2544 | CA  | CA  | . | ILE | ILE | A | A | 173 | 173 | . | 4.746  | 37.659 | 14.887 | 1.00 | 25.37 | . |
| ATOM | 2545 | C   | C   | . | ILE | ILE | A | A | 173 | 173 | . | 3.519  | 38.478 | 14.511 | 1.00 | 24.11 | . |
| ATOM | 2546 | O   | O   | . | ILE | ILE | A | A | 173 | 173 | . | 2.754  | 38.109 | 13.622 | 1.00 | 26.04 | . |
| ATOM | 2547 | CB  | CB  | . | ILE | ILE | A | A | 173 | 173 | . | 4.697  | 36.289 | 14.145 | 1.00 | 23.12 | . |
| ATOM | 2548 | CG1 | CG1 | . | ILE | ILE | A | A | 173 | 173 | . | 3.592  | 35.411 | 14.735 | 1.00 | 21.38 | . |
| ATOM | 2549 | CG2 | CG2 | . | ILE | ILE | A | A | 173 | 173 | . | 6.052  | 35.591 | 14.242 | 1.00 | 21.28 | . |
| ATOM | 2550 | CD1 | CD1 | . | ILE | ILE | A | A | 173 | 173 | . | 3.371  | 34.090 | 13.984 | 1.00 | 24.83 | . |
| ATOM | 2551 | N   | N   | . | HIS | HIS | A | A | 174 | 174 | . | 3.350  | 39.603 | 15.199 | 1.00 | 24.41 | . |
| ATOM | 2552 | CA  | CA  | . | HIS | HIS | A | A | 174 | 174 | . | 2.215  | 40.490 | 14.997 | 1.00 | 19.18 | . |
| ATOM | 2553 | C   | C   | . | HIS | HIS | A | A | 174 | 174 | . | 1.957  | 40.991 | 13.583 | 1.00 | 17.58 | . |
| ATOM | 2554 | O   | O   | . | HIS | HIS | A | A | 174 | 174 | . | 2.839  | 41.541 | 12.926 | 1.00 | 19.98 | . |
| ATOM | 2555 | CB  | CB  | . | HIS | HIS | A | A | 174 | 174 | . | 2.335  | 41.691 | 15.942 | 1.00 | 30.56 | . |
| ATOM | 2556 | CG  | CG  | . | HIS | HIS | A | A | 174 | 174 | . | 1.284  | 42.734 | 15.731 | 1.00 | 27.69 | . |
| ATOM | 2557 | ND1 | ND1 | . | HIS | HIS | A | A | 174 | 174 | . | 1.341  | 43.649 | 14.703 | 1.00 | 28.94 | . |
| ATOM | 2558 | CD2 | CD2 | . | HIS | HIS | A | A | 174 | 174 | . | 0.137  | 42.992 | 16.403 | 1.00 | 25.57 | . |
| ATOM | 2559 | CE1 | CE1 | . | HIS | HIS | A | A | 174 | 174 | . | 0.274  | 44.427 | 14.749 | 1.00 | 27.31 | . |
| ATOM | 2560 | NE2 | NE2 | . | HIS | HIS | A | A | 174 | 174 | . | -0.473 | 44.048 | 15.771 | 1.00 | 27.47 | . |
| ATOM | 2561 | N   | N   | . | GLY | GLY | A | A | 175 | 175 | . | 0.723  | 40.813 | 13.130 | 1.00 | 19.47 | . |
| ATOM | 2562 | CA  | CA  | . | GLY | GLY | A | A | 175 | 175 | . | 0.341  | 41.276 | 11.810 | 1.00 | 24.14 | . |
| ATOM | 2563 | C   | C   | . | GLY | GLY | A | A | 175 | 175 | . | 0.550  | 40.278 | 10.685 | 1.00 | 25.33 | . |
| ATOM | 2564 | O   | O   | . | GLY | GLY | A | A | 175 | 175 | . | 0.095  | 40.507 | 9.567  | 1.00 | 28.06 | . |
| ATOM | 2565 | N   | N   | . | GLN | GLN | A | A | 176 | 176 | . | 1.240  | 39.179 | 10.959 | 1.00 | 20.96 | . |
| ATOM | 2566 | CA  | CA  | . | GLN | GLN | A | A | 176 | 176 | . | 1.478  | 38.180 | 9.922  | 1.00 | 17.60 | . |
| ATOM | 2567 | C   | C   | . | GLN | GLN | A | A | 176 | 176 | . | 0.203  | 37.374 | 9.684  | 1.00 | 21.38 | . |
| ATOM | 2568 | O   | O   | . | GLN | GLN | A | A | 176 | 176 | . | -0.511 | 37.028 | 10.629 | 1.00 | 21.39 | . |
| ATOM | 2569 | CB  | CB  | . | GLN | GLN | A | A | 176 | 176 | . | 2.646  | 37.279 | 10.327 | 1.00 | 23.06 | . |
| ATOM | 2570 | CG  | CG  | . | GLN | GLN | A | A | 176 | 176 | . | 3.968  | 38.043 | 10.409 | 1.00 | 23.13 | . |
| ATOM | 2571 | CD  | CD  | . | GLN | GLN | A | A | 176 | 176 | . | 5.165  | 37.159 | 10.672 | 1.00 | 19.15 | . |
| ATOM | 2572 | OE1 | OE1 | . | GLN | GLN | A | A | 176 | 176 | . | 5.220  | 36.020 | 10.221 | 1.00 | 20.30 | . |
| ATOM | 2573 | NE2 | NE2 | . | GLN | GLN | A | A | 176 | 176 | . | 6.151  | 37.695 | 11.386 | 1.00 | 26.10 | . |
| ATOM | 2574 | N   | N   | . | ARG | ARG | A | A | 177 | 177 | . | -0.095 | 37.092 | 8.419  | 1.00 | 20.95 | . |
| ATOM | 2575 | CA  | CA  | . | ARG | ARG | A | A | 177 | 177 | . | -1.312 | 36.358 | 8.078  | 1.00 | 23.16 | . |
| ATOM | 2576 | C   | C   | . | ARG | ARG | A | A | 177 | 177 | . | -1.215 | 34.844 | 8.238  | 1.00 | 22.67 | . |
| ATOM | 2577 | O   | O   | . | ARG | ARG | A | A | 177 | 177 | . | -0.179 | 34.241 | 7.947  | 1.00 | 19.49 | . |
| ATOM | 2578 | CB  | CB  | . | ARG | ARG | A | A | 177 | 177 | . | -1.746 | 36.688 | 6.647  | 1.00 | 25.76 | . |
| ATOM | 2579 | CG  | CG  | . | ARG | ARG | A | A | 177 | 177 | . | -2.163 | 38.141 | 6.423  | 1.00 | 22.12 | . |
| ATOM | 2580 | CD  | CD  | . | ARG | ARG | A | A | 177 | 177 | . | -0.964 | 39.065 | 6.319  | 1.00 | 24.32 | . |
| ATOM | 2581 | NE  | NE  | . | ARG | ARG | A | A | 177 | 177 | . | -1.288 | 40.322 | 5.646  | 1.00 | 28.43 | . |
| ATOM | 2582 | CZ  | CZ  | . | ARG | ARG | A | A | 177 | 177 | . | -1.854 | 41.373 | 6.230  | 1.00 | 40.37 | . |
| ATOM | 2583 | NH1 | NH1 | . | ARG | ARG | A | A | 177 | 177 | . | -2.167 | 41.336 | 7.517  | 1.00 | 41.82 | . |
| ATOM | 2584 | NH2 | NH2 | . | ARG | ARG | A | A | 177 | 177 | . | -2.109 | 42.469 | 5.521  | 1.00 | 39.87 | . |
| ATOM | 2585 | N   | N   | . | GLU | GLU | A | A | 178 | 178 | . | -2.306 | 34.237 | 8.707  | 1.00 | 17.81 | . |
| ATOM | 2586 | CA  | CA  | . | GLU | GLU | A | A | 178 | 178 | . | -2.348 | 32.791 | 8.889  | 1.00 | 24.64 | . |
| ATOM | 2587 | C   | C   | . | GLU | GLU | A | A | 178 | 178 | . | -2.487 | 32.113 | 7.529  | 1.00 | 19.11 | . |
| ATOM | 2588 | O   | O   | . | GLU | GLU | A | A | 178 | 178 | . | -3.314 | 32.511 | 6.707  | 1.00 | 21.73 | . |
| ATOM | 2589 | CB  | CB  | . | GLU | GLU | A | A | 178 | 178 | . | -3.532 | 32.381 | 9.782  | 1.00 | 28.23 | . |
| ATOM | 2590 | CG  | CG  | . | GLU | GLU | A | A | 178 | 178 | . | -3.709 | 30.866 | 9.905  | 1.00 | 28.48 | . |
| ATOM | 2591 | CD  | CD  | . | GLU | GLU | A | A | 178 | 178 | . | -5.008 | 30.462 | 10.602 | 1.00 | 37.76 | . |
| ATOM | 2592 | OE1 | OE1 | . | GLU | GLU | A | A | 178 | 178 | . | -6.037 | 31.137 | 10.386 | 1.00 | 25.51 | . |
| ATOM | 2593 | OE2 | OE2 | . | GLU | GLU | A | A | 178 | 178 | . | -5.000 | 29.460 | 11.350 | 1.00 | 29.77 | . |
| ATOM | 2594 | N   | N   | . | VAL | VAL | A | A | 179 | 179 | . | -1.652 | 31.105 | 7.303  | 1.00 | 22.11 | . |
| ATOM | 2595 | CA  | CA  | . | VAL | VAL | A | A | 179 | 179 | . | -1.659 | 30.325 | 6.074  | 1.00 | 16.88 | . |

|      |      |     |     |   |     |     |   |   |     |     |   |         |        |        |      |       |   |
|------|------|-----|-----|---|-----|-----|---|---|-----|-----|---|---------|--------|--------|------|-------|---|
| ATOM | 2596 | C   | C   | . | VAL | VAL | A | A | 179 | 179 | . | -2.212  | 28.945 | 6.448  | 1.00 | 16.94 | . |
| ATOM | 2597 | O   | O   | . | VAL | VAL | A | A | 179 | 179 | . | -1.755  | 28.321 | 7.417  | 1.00 | 21.65 | . |
| ATOM | 2598 | CB  | CB  | . | VAL | VAL | A | A | 179 | 179 | . | -0.232  | 30.163 | 5.508  | 1.00 | 20.80 | . |
| ATOM | 2599 | CG1 | CG1 | . | VAL | VAL | A | A | 179 | 179 | . | -0.250  | 29.202 | 4.323  | 1.00 | 19.35 | . |
| ATOM | 2600 | CG2 | CG2 | . | VAL | VAL | A | A | 179 | 179 | . | 0.327   | 31.517 | 5.078  | 1.00 | 14.44 | . |
| ATOM | 2601 | N   | N   | . | VAL | VAL | A | A | 180 | 180 | . | -3.192  | 28.467 | 5.694  | 1.00 | 19.97 | . |
| ATOM | 2602 | CA  | CA  | . | VAL | VAL | A | A | 180 | 180 | . | -3.794  | 27.175 | 5.998  | 1.00 | 24.10 | . |
| ATOM | 2603 | C   | C   | . | VAL | VAL | A | A | 180 | 180 | . | -4.199  | 26.402 | 4.750  | 1.00 | 26.36 | . |
| ATOM | 2604 | O   | O   | . | VAL | VAL | A | A | 180 | 180 | . | -4.016  | 26.864 | 3.623  | 1.00 | 21.67 | . |
| ATOM | 2605 | CB  | CB  | . | VAL | VAL | A | A | 180 | 180 | . | -5.065  | 27.330 | 6.860  | 1.00 | 23.18 | . |
| ATOM | 2606 | CG1 | CG1 | . | VAL | VAL | A | A | 180 | 180 | . | -4.766  | 28.140 | 8.114  | 1.00 | 25.66 | . |
| ATOM | 2607 | CG2 | CG2 | . | VAL | VAL | A | A | 180 | 180 | . | -6.162  | 27.989 | 6.041  | 1.00 | 23.75 | . |
| ATOM | 2608 | N   | N   | . | GLY | GLY | A | A | 181 | 181 | . | -4.769  | 25.222 | 4.980  | 1.00 | 26.58 | . |
| ATOM | 2609 | CA  | CA  | . | GLY | GLY | A | A | 181 | 181 | . | -5.219  | 24.377 | 3.892  | 1.00 | 26.55 | . |
| ATOM | 2610 | C   | C   | . | GLY | GLY | A | A | 181 | 181 | . | -6.735  | 24.355 | 3.905  | 1.00 | 24.92 | . |
| ATOM | 2611 | O   | O   | . | GLY | GLY | A | A | 181 | 181 | . | -7.345  | 23.923 | 4.880  | 1.00 | 29.10 | . |
| ATOM | 2612 | N   | N   | . | THR | THR | A | A | 182 | 182 | . | -7.345  | 24.838 | 2.832  | 1.00 | 24.48 | . |
| ATOM | 2613 | CA  | CA  | . | THR | THR | A | A | 182 | 182 | . | -8.794  | 24.868 | 2.754  | 1.00 | 30.93 | . |
| ATOM | 2614 | C   | C   | . | THR | THR | A | A | 182 | 182 | . | -9.319  | 23.770 | 1.839  | 1.00 | 31.83 | . |
| ATOM | 2615 | O   | O   | . | THR | THR | A | A | 182 | 182 | . | -8.713  | 23.467 | 0.811  | 1.00 | 32.83 | . |
| ATOM | 2616 | CB  | CB  | . | THR | THR | A | A | 182 | 182 | . | -9.279  | 26.232 | 2.237  | 1.00 | 30.72 | . |
| ATOM | 2617 | OG1 | OG1 | . | THR | THR | A | A | 182 | 182 | . | -8.703  | 26.490 | 0.952  | 1.00 | 27.58 | . |
| ATOM | 2618 | CG2 | CG2 | . | THR | THR | A | A | 182 | 182 | . | -8.864  | 27.338 | 3.202  | 1.00 | 25.39 | . |
| ATOM | 2619 | N   | N   | . | ASP | ASP | A | A | 183 | 183 | . | -10.440 | 23.162 | 2.219  | 1.00 | 33.67 | . |
| ATOM | 2620 | CA  | CA  | . | ASP | ASP | A | A | 183 | 183 | . | -11.033 | 22.113 | 1.399  | 1.00 | 30.68 | . |
| ATOM | 2621 | C   | C   | . | ASP | ASP | A | A | 183 | 183 | . | -11.448 | 22.693 | 0.054  | 1.00 | 25.46 | . |
| ATOM | 2622 | O   | O   | . | ASP | ASP | A | A | 183 | 183 | . | -11.349 | 22.030 | -0.970 | 1.00 | 37.77 | . |
| ATOM | 2623 | CB  | CB  | . | ASP | ASP | A | A | 183 | 183 | . | -12.252 | 21.491 | 2.089  | 1.00 | 37.83 | . |
| ATOM | 2624 | CG  | CG  | . | ASP | ASP | A | A | 183 | 183 | . | -11.876 | 20.658 | 3.302  | 1.00 | 50.23 | . |
| ATOM | 2625 | OD1 | OD1 | . | ASP | ASP | A | A | 183 | 183 | . | -10.952 | 19.820 | 3.193  | 1.00 | 54.80 | . |
| ATOM | 2626 | OD2 | OD2 | . | ASP | ASP | A | A | 183 | 183 | . | -12.510 | 20.836 | 4.365  | 1.00 | 57.30 | . |
| ATOM | 2627 | N   | N   | . | SER | SER | A | A | 184 | 184 | . | -11.892 | 23.941 | 0.049  | 1.00 | 29.97 | . |
| ATOM | 2628 | CA  | CA  | . | SER | SER | A | A | 184 | 184 | . | -12.313 | 24.563 | -1.198 | 1.00 | 27.24 | . |
| ATOM | 2629 | C   | C   | . | SER | SER | A | A | 184 | 184 | . | -11.505 | 25.813 | -1.530 | 1.00 | 32.01 | . |
| ATOM | 2630 | O   | O   | . | SER | SER | A | A | 184 | 184 | . | -10.810 | 26.365 | -0.679 | 1.00 | 31.39 | . |
| ATOM | 2631 | CB  | CB  | . | SER | SER | A | A | 184 | 184 | . | -13.804 | 24.914 | -1.131 | 1.00 | 37.93 | . |
| ATOM | 2632 | OG  | OG  | . | SER | SER | A | A | 184 | 184 | . | -14.588 | 23.752 | -0.913 | 1.00 | 48.99 | . |
| ATOM | 2633 | N   | N   | . | ILE | ILE | A | A | 185 | 185 | . | -11.603 | 26.248 | -2.781 | 1.00 | 30.62 | . |
| ATOM | 2634 | CA  | CA  | . | ILE | ILE | A | A | 185 | 185 | . | -10.900 | 27.429 | -3.240 | 1.00 | 34.03 | . |
| ATOM | 2635 | C   | C   | . | ILE | ILE | A | A | 185 | 185 | . | -11.574 | 28.663 | -2.653 | 1.00 | 38.86 | . |
| ATOM | 2636 | O   | O   | . | ILE | ILE | A | A | 185 | 185 | . | -12.793 | 28.805 | -2.723 | 1.00 | 38.25 | . |
| ATOM | 2637 | CB  | CB  | . | ILE | ILE | A | A | 185 | 185 | . | -10.927 | 27.512 | -4.777 | 1.00 | 29.91 | . |
| ATOM | 2638 | CG1 | CG1 | . | ILE | ILE | A | A | 185 | 185 | . | -10.170 | 26.316 | -5.367 | 1.00 | 43.46 | . |
| ATOM | 2639 | CG2 | CG2 | . | ILE | ILE | A | A | 185 | 185 | . | -10.302 | 28.814 | -5.243 | 1.00 | 23.99 | . |
| ATOM | 2640 | CD1 | CD1 | . | ILE | ILE | A | A | 185 | 185 | . | -10.167 | 26.262 | -6.883 | 1.00 | 40.21 | . |
| ATOM | 2641 | N   | N   | . | THR | THR | A | A | 186 | 186 | . | -10.781 | 29.553 | -2.069 | 1.00 | 35.03 | . |
| ATOM | 2642 | CA  | CA  | . | THR | THR | A | A | 186 | 186 | . | -11.325 | 30.764 | -1.476 | 1.00 | 33.19 | . |
| ATOM | 2643 | C   | C   | . | THR | THR | A | A | 186 | 186 | . | -10.685 | 32.014 | -2.068 | 1.00 | 33.13 | . |
| ATOM | 2644 | O   | O   | . | THR | THR | A | A | 186 | 186 | . | -9.902  | 31.938 | -3.023 | 1.00 | 31.78 | . |
| ATOM | 2645 | CB  | CB  | . | THR | THR | A | A | 186 | 186 | . | -11.122 | 30.774 | 0.058  | 1.00 | 34.11 | . |
| ATOM | 2646 | OG1 | OG1 | . | THR | THR | A | A | 186 | 186 | . | -9.721  | 30.828 | 0.364  | 1.00 | 30.91 | . |
| ATOM | 2647 | CG2 | CG2 | . | THR | THR | A | A | 186 | 186 | . | -11.717 | 29.521 | 0.679  | 1.00 | 30.13 | . |
| ATOM | 2648 | N   | N   | . | GLY | GLY | A | A | 187 | 187 | . | -11.033 | 33.164 | -1.499 | 1.00 | 26.68 | . |
| ATOM | 2649 | CA  | CA  | . | GLY | GLY | A | A | 187 | 187 | . | -10.484 | 34.422 | -1.967 | 1.00 | 25.97 | . |
| ATOM | 2650 | C   | C   | . | GLY | GLY | A | A | 187 | 187 | . | -9.044  | 34.592 | -1.515 | 1.00 | 21.91 | . |
| ATOM | 2651 | O   | O   | . | GLY | GLY | A | A | 187 | 187 | . | -8.409  | 35.609 | -1.804 | 1.00 | 31.59 | . |
| ATOM | 2652 | N   | N   | . | GLY | GLY | A | A | 188 | 188 | . | -8.532  | 33.600 | -0.794 | 1.00 | 22.65 | . |

|      |      |     |     |   |     |     |   |   |     |     |   |        |        |         |      |       |   |
|------|------|-----|-----|---|-----|-----|---|---|-----|-----|---|--------|--------|---------|------|-------|---|
| ATOM | 2653 | CA  | CA  | . | GLY | GLY | A | A | 188 | 188 | . | -7.155 | 33.660 | -0.329  | 1.00 | 23.78 | . |
| ATOM | 2654 | C   | C   | . | GLY | GLY | A | A | 188 | 188 | . | -6.305 | 32.571 | -0.965  | 1.00 | 23.03 | . |
| ATOM | 2655 | O   | O   | . | GLY | GLY | A | A | 188 | 188 | . | -5.143 | 32.394 | -0.598  | 1.00 | 23.41 | . |
| ATOM | 2656 | N   | N   | . | SER | SER | A | A | 189 | 189 | . | -6.876 | 31.859 | -1.937  | 1.00 | 21.07 | . |
| ATOM | 2657 | CA  | CA  | . | SER | SER | A | A | 189 | 189 | . | -6.185 | 30.756 | -2.616  | 1.00 | 19.43 | . |
| ATOM | 2658 | C   | C   | . | SER | SER | A | A | 189 | 189 | . | -5.348 | 31.129 | -3.841  | 1.00 | 16.53 | . |
| ATOM | 2659 | O   | O   | . | SER | SER | A | A | 189 | 189 | . | -4.547 | 30.323 | -4.314  | 1.00 | 21.03 | . |
| ATOM | 2660 | CB  | CB  | . | SER | SER | A | A | 189 | 189 | . | -7.201 | 29.688 | -3.031  | 1.00 | 20.55 | . |
| ATOM | 2661 | OG  | OG  | . | SER | SER | A | A | 189 | 189 | . | -7.985 | 29.267 | -1.925  | 1.00 | 27.07 | . |
| ATOM | 2662 | N   | N   | . | ALA | ALA | A | A | 190 | 190 | . | -5.521 | 32.337 | -4.360  | 1.00 | 19.01 | . |
| ATOM | 2663 | CA  | CA  | . | ALA | ALA | A | A | 190 | 190 | . | -4.770 | 32.748 | -5.540  | 1.00 | 17.20 | . |
| ATOM | 2664 | C   | C   | . | ALA | ALA | A | A | 190 | 190 | . | -3.391 | 33.315 | -5.202  | 1.00 | 19.32 | . |
| ATOM | 2665 | O   | O   | . | ALA | ALA | A | A | 190 | 190 | . | -3.266 | 34.213 | -4.374  | 1.00 | 13.82 | . |
| ATOM | 2666 | CB  | CB  | . | ALA | ALA | A | A | 190 | 190 | . | -5.568 | 33.764 | -6.331  | 1.00 | 23.09 | . |
| ATOM | 2667 | N   | N   | . | TRP | TRP | A | A | 191 | 191 | . | -2.359 | 32.781 | -5.849  | 1.00 | 12.34 | . |
| ATOM | 2668 | CA  | CA  | . | TRP | TRP | A | A | 191 | 191 | . | -0.994 | 33.246 | -5.629  | 1.00 | 20.80 | . |
| ATOM | 2669 | C   | C   | . | TRP | TRP | A | A | 191 | 191 | . | -0.354 | 33.698 | -6.933  | 1.00 | 18.94 | . |
| ATOM | 2670 | O   | O   | . | TRP | TRP | A | A | 191 | 191 | . | -0.802 | 33.336 | -8.026  | 1.00 | 21.60 | . |
| ATOM | 2671 | CB  | CB  | . | TRP | TRP | A | A | 191 | 191 | . | -0.127 | 32.136 | -5.012  | 1.00 | 15.87 | . |
| ATOM | 2672 | CG  | CG  | . | TRP | TRP | A | A | 191 | 191 | . | -0.640 | 31.640 | -3.688  | 1.00 | 13.53 | . |
| ATOM | 2673 | CD1 | CD1 | . | TRP | TRP | A | A | 191 | 191 | . | -1.576 | 30.667 | -3.483  | 1.00 | 13.97 | . |
| ATOM | 2674 | CD2 | CD2 | . | TRP | TRP | A | A | 191 | 191 | . | -0.270 | 32.124 | -2.391  | 1.00 | 16.68 | . |
| ATOM | 2675 | NE1 | NE1 | . | TRP | TRP | A | A | 191 | 191 | . | -1.815 | 30.512 | -2.134  | 1.00 | 20.55 | . |
| ATOM | 2676 | CE2 | CE2 | . | TRP | TRP | A | A | 191 | 191 | . | -1.026 | 31.399 | -1.442  | 1.00 | 14.07 | . |
| ATOM | 2677 | CE3 | CE3 | . | TRP | TRP | A | A | 191 | 191 | . | 0.627  | 33.106 | -1.939  | 1.00 | 16.49 | . |
| ATOM | 2678 | CZ2 | CZ2 | . | TRP | TRP | A | A | 191 | 191 | . | -0.916 | 31.625 | -0.066  | 1.00 | 15.95 | . |
| ATOM | 2679 | CZ3 | CZ3 | . | TRP | TRP | A | A | 191 | 191 | . | 0.736  | 33.329 | -0.565  | 1.00 | 16.16 | . |
| ATOM | 2680 | CH2 | CH2 | . | TRP | TRP | A | A | 191 | 191 | . | -0.035 | 32.590 | 0.353   | 1.00 | 17.16 | . |
| ATOM | 2681 | N   | N   | . | LYS | LYS | A | A | 192 | 192 | . | 0.714  | 34.469 | -6.791  | 1.00 | 18.47 | . |
| ATOM | 2682 | CA  | CA  | . | LYS | LYS | A | A | 192 | 192 | . | 1.472  | 35.005 | -7.910  | 1.00 | 19.32 | . |
| ATOM | 2683 | C   | C   | . | LYS | LYS | A | A | 192 | 192 | . | 2.954  | 34.902 | -7.556  | 1.00 | 26.60 | . |
| ATOM | 2684 | O   | O   | . | LYS | LYS | A | A | 192 | 192 | . | 3.342  | 35.147 | -6.414  | 1.00 | 28.55 | . |
| ATOM | 2685 | CB  | CB  | . | LYS | LYS | A | A | 192 | 192 | . | 1.083  | 36.467 | -8.131  | 1.00 | 18.31 | . |
| ATOM | 2686 | CG  | CG  | . | LYS | LYS | A | A | 192 | 192 | . | 1.951  | 37.211 | -9.105  | 1.00 | 33.17 | . |
| ATOM | 2687 | CD  | CD  | . | LYS | LYS | A | A | 192 | 192 | . | 1.636  | 38.708 | -9.077  | 1.00 | 47.63 | . |
| ATOM | 2688 | CE  | CE  | . | LYS | LYS | A | A | 192 | 192 | . | 1.866  | 39.284 | -7.682  | 1.00 | 47.45 | . |
| ATOM | 2689 | NZ  | NZ  | . | LYS | LYS | A | A | 192 | 192 | . | 1.669  | 40.756 | -7.613  | 1.00 | 51.73 | . |
| ATOM | 2690 | N   | N   | . | VAL | VAL | A | A | 193 | 193 | . | 3.778  | 34.543 | -8.535  | 1.00 | 23.62 | . |
| ATOM | 2691 | CA  | CA  | . | VAL | VAL | A | A | 193 | 193 | . | 5.211  | 34.399 | -8.319  | 1.00 | 31.91 | . |
| ATOM | 2692 | C   | C   | . | VAL | VAL | A | A | 193 | 193 | . | 5.955  | 35.686 | -8.651  | 1.00 | 37.20 | . |
| ATOM | 2693 | O   | O   | . | VAL | VAL | A | A | 193 | 193 | . | 5.493  | 36.490 | -9.455  | 1.00 | 41.85 | . |
| ATOM | 2694 | CB  | CB  | . | VAL | VAL | A | A | 193 | 193 | . | 5.782  | 33.243 | -9.182  | 1.00 | 34.25 | . |
| ATOM | 2695 | CG1 | CG1 | . | VAL | VAL | A | A | 193 | 193 | . | 7.284  | 33.363 | -9.304  | 1.00 | 44.66 | . |
| ATOM | 2696 | CG2 | CG2 | . | VAL | VAL | A | A | 193 | 193 | . | 5.429  | 31.908 | -8.553  | 1.00 | 40.07 | . |
| ATOM | 2697 | N   | N   | . | ALA | ALA | A | A | 194 | 194 | . | 7.105  | 35.881 | -8.016  | 1.00 | 43.72 | . |
| ATOM | 2698 | CA  | CA  | . | ALA | ALA | A | A | 194 | 194 | . | 7.932  | 37.059 | -8.255  | 1.00 | 42.95 | . |
| ATOM | 2699 | C   | C   | . | ALA | ALA | A | A | 194 | 194 | . | 9.384  | 36.697 | -7.962  | 1.00 | 48.32 | . |
| ATOM | 2700 | O   | O   | . | ALA | ALA | A | A | 194 | 194 | . | 9.676  | 35.940 | -7.030  | 1.00 | 34.61 | . |
| ATOM | 2701 | CB  | CB  | . | ALA | ALA | A | A | 194 | 194 | . | 7.482  | 38.216 | -7.361  | 1.00 | 34.12 | . |
| ATOM | 2702 | N   | N   | . | GLU | GLU | A | A | 195 | 195 | . | 10.303 | 37.222 | -8.761  | 1.00 | 48.23 | . |
| ATOM | 2703 | CA  | CA  | . | GLU | GLU | A | A | 195 | 195 | . | 11.703 | 36.921 | -8.528  | 1.00 | 55.29 | . |
| ATOM | 2704 | C   | C   | . | GLU | GLU | A | A | 195 | 195 | . | 12.264 | 37.787 | -7.417  | 1.00 | 55.48 | . |
| ATOM | 2705 | O   | O   | . | GLU | GLU | A | A | 195 | 195 | . | 12.378 | 39.004 | -7.564  | 1.00 | 61.47 | . |
| ATOM | 2706 | CB  | CB  | . | GLU | GLU | A | A | 195 | 195 | . | 12.535 | 37.126 | -9.794  | 1.00 | 51.81 | . |
| ATOM | 2707 | CG  | CG  | . | GLU | GLU | A | A | 195 | 195 | . | 14.022 | 36.973 | -9.536  | 1.00 | 51.64 | . |
| ATOM | 2708 | CD  | CD  | . | GLU | GLU | A | A | 195 | 195 | . | 14.693 | 36.022 | -10.502 | 1.00 | 56.26 | . |
| ATOM | 2709 | OE1 | OE1 | . | GLU | GLU | A | A | 195 | 195 | . | 14.943 | 36.424 | -11.659 | 1.00 | 58.90 | . |

|        |      |     |     |   |     |     |   |   |     |     |   |        |        |         |      |       |   |
|--------|------|-----|-----|---|-----|-----|---|---|-----|-----|---|--------|--------|---------|------|-------|---|
| ATOM   | 2710 | OE2 | OE2 | . | GLU | GLU | A | A | 195 | 195 | . | 14.961 | 34.869 | -10.100 | 1.00 | 51.64 | . |
| ATOM   | 2711 | N   | N   | . | GLY | GLY | A | A | 196 | 196 | . | 12.593 | 37.156 | -6.295  | 1.00 | 61.31 | . |
| ATOM   | 2712 | CA  | CA  | . | GLY | GLY | A | A | 196 | 196 | . | 13.175 | 37.894 | -5.192  | 1.00 | 65.49 | . |
| ATOM   | 2713 | C   | C   | . | GLY | GLY | A | A | 196 | 196 | . | 14.590 | 38.222 | -5.620  | 1.00 | 68.22 | . |
| ATOM   | 2714 | O   | O   | . | GLY | GLY | A | A | 196 | 196 | . | 14.943 | 39.386 | -5.829  | 1.00 | 63.76 | . |
| ATOM   | 2715 | N   | N   | . | ILE | ILE | A | A | 197 | 197 | . | 15.399 | 37.176 | -5.762  | 1.00 | 67.90 | . |
| ATOM   | 2716 | CA  | CA  | . | ILE | ILE | A | A | 197 | 197 | . | 16.781 | 37.307 | -6.198  | 1.00 | 67.52 | . |
| ATOM   | 2717 | C   | C   | . | ILE | ILE | A | A | 197 | 197 | . | 17.238 | 35.976 | -6.789  | 1.00 | 69.46 | . |
| ATOM   | 2718 | O   | O   | . | ILE | ILE | A | A | 197 | 197 | . | 18.047 | 35.287 | -6.134  | 1.00 | 71.49 | . |
| ATOM   | 2719 | CB  | CB  | . | ILE | ILE | A | A | 197 | 197 | . | 17.731 | 37.674 | -5.044  | 1.00 | 67.81 | . |
| ATOM   | 2720 | CG1 | CG1 | . | ILE | ILE | A | A | 197 | 197 | . | 17.240 | 38.921 | -4.309  | 1.00 | 69.85 | . |
| ATOM   | 2721 | CG2 | CG2 | . | ILE | ILE | A | A | 197 | 197 | . | 19.103 | 37.956 | -5.609  | 1.00 | 71.56 | . |
| ATOM   | 2722 | CD1 | CD1 | . | ILE | ILE | A | A | 197 | 197 | . | 18.102 | 39.312 | -3.123  | 1.00 | 74.69 | . |
| HETATM | 2723 | C1  | C1  | . | MLI | MLI | . | . | 201 | 201 | . | -7.927 | 27.091 | -12.656 | 1.00 | 43.60 | . |
| HETATM | 2724 | C2  | C2  | . | MLI | MLI | . | . | 201 | 201 | . | -8.739 | 26.864 | -11.380 | 1.00 | 47.27 | . |
| HETATM | 2725 | C3  | C3  | . | MLI | MLI | . | . | 201 | 201 | . | -6.642 | 27.854 | -12.323 | 1.00 | 44.60 | . |
| HETATM | 2726 | O6  | O6  | . | MLI | MLI | . | . | 201 | 201 | . | -8.474 | 25.922 | -10.633 | 1.00 | 46.51 | . |
| HETATM | 2727 | O7  | O7  | . | MLI | MLI | . | . | 201 | 201 | . | -9.663 | 27.621 | -11.085 | 1.00 | 46.46 | . |
| HETATM | 2728 | O8  | O8  | . | MLI | MLI | . | . | 201 | 201 | . | -6.222 | 28.726 | -13.081 | 1.00 | 47.30 | . |
| HETATM | 2729 | O9  | O9  | . | MLI | MLI | . | . | 201 | 201 | . | -6.014 | 27.602 | -11.297 | 1.00 | 56.58 | . |

#

|                                       |          |
|---------------------------------------|----------|
| _atom_sites.entry_id                  | UNNAMED  |
| _atom_sites.fract_transf_matrix[1][1] | 1.000000 |
| _atom_sites.fract_transf_matrix[1][2] | 0.000000 |
| _atom_sites.fract_transf_matrix[1][3] | 0.000000 |
| _atom_sites.fract_transf_matrix[2][1] | 0.000000 |
| _atom_sites.fract_transf_matrix[2][2] | 1.000000 |
| _atom_sites.fract_transf_matrix[2][3] | 0.000000 |
| _atom_sites.fract_transf_matrix[3][1] | 0.000000 |
| _atom_sites.fract_transf_matrix[3][2] | 0.000000 |
| _atom_sites.fract_transf_matrix[3][3] | 1.000000 |
| _atom_sites.fract_transf_vector[1]    | 0.000000 |
| _atom_sites.fract_transf_vector[2]    | 0.000000 |
| _atom_sites.fract_transf_vector[3]    | 0.000000 |

#

\_audit\_author.name 'ProMod (SEE REFERENCE IN JRNL Records)'

#

|                   |         |
|-------------------|---------|
| _cell.length_a    | 1.000   |
| _cell.length_b    | 1.000   |
| _cell.length_c    | 1.000   |
| _cell.angle_alpha | 90.000  |
| _cell.angle_beta  | 90.000  |
| _cell.angle_gamma | 90.000  |
| _cell.entry_id    | UNNAMED |

#

|                           |         |
|---------------------------|---------|
| _citation.id              | primary |
| _citation.title           |         |
| _citation.journal_abbrev  | (null)  |
| _citation.journal_volume  | (null)  |
| _citation.page_first      | (null)  |
| _citation.page_last       | ?       |
| _citation.year            | (null)  |
| _citation.journal_id_ASTM | (null)  |
| _citation.country         | (null)  |
| _citation.journal_id_ISSN | (null)  |
| _citation.journal_id_CSD  | ?       |
| _citation.book_publisher  | ?       |

```

_citation.pdbx_database_id_PubMed  ?
_citation.pdbx_database_id_DOI    ?
#
_citation_author.citation_id      primary
_citation_author.name             M
_citation_author.ordinal           1
#
_computing.entry_id                UNNAMED
_computing.structure_refinement    GROMOS96
_computing.structure_solution      ?
_computing.pdbx_density_modification ?
_computing.pdbx_data_reduction_ds  ?
_computing.pdbx_data_reduction_ii  ?
_computing.cell_refinement         ?
#
_data_extraction.software           pdb_extract
_data_extraction.extraction_date    'Mon Aug 25 17:58:07 2008'
_data_extraction.version            3.006
_data_extraction.release_date       'June 11, 2008'
_data_extraction.location            http://sw-tools.rcsb.org/apps/PDB\_EXTRACT/
#
_database_PDB_matrix.entry_id       UNNAMED
_database_PDB_matrix.origx[1][1]    1.000000
_database_PDB_matrix.origx[1][2]    0.000000
_database_PDB_matrix.origx[1][3]    0.000000
_database_PDB_matrix.origx[2][1]    0.000000
_database_PDB_matrix.origx[2][2]    1.000000
_database_PDB_matrix.origx[2][3]    0.000000
_database_PDB_matrix.origx[3][1]    0.000000
_database_PDB_matrix.origx[3][2]    0.000000
_database_PDB_matrix.origx[3][3]    1.000000
_database_PDB_matrix.origx_vector[1] 0.000000
_database_PDB_matrix.origx_vector[2] 0.000000
_database_PDB_matrix.origx_vector[3] 0.000000
#
loop_
_database_PDB_remark.id
_database_PDB_remark.text
1
;
REMARK 1
;
2
;
REMARK 2
REMARK 2 RESOLUTION. NOT APPLICABLE. SEE REMARK 4.
;
3
;
REMARK 3
REMARK 3 REFINEMENT. NONE.
REMARK 3
REMARK 3 MODELLING METHOD.
REMARK 3 PROGRAM : ProModII
REMARK 3 AUTHORS : N.GUEX,M.C.PEITSCH
REMARK 3
REMARK 3 ENERGY MINIMISATION.

```

```

REMARK 3 PROGRAM : GROMOS96
REMARK 3 AUTHORS : VAN GUNSTEREN
REMARK 3 PARAMETER : IFP43B1
REMARK 3 TOPOLOGY FILE : MTB43B1
REMARK 3 METHOD 1 : STEEPEST DESCENT
REMARK 3 CYCLES 1 : 200
REMARK 3 CONSTRAINTS 1 : 25 / C-FACTORS
REMARK 3 METHOD 2 : CONJUGATE GRADIENT
REMARK 3 CYCLES 2 : 300
REMARK 3 CONSTRAINTS 2 : 2500 / C-FACTORS
REMARK 3
;
4
;
REMARK 4
REMARK 4 THE COORDINATES IN THIS ENTRY REPRESENT A MODEL STRUCTURE.
REMARK 4 PROTEIN DATA BANK CONVENTIONS REQUIRE THAT *CRYST1* AND
REMARK 4 *SCALE* RECORDS BE INCLUDED, BUT THE VALUES ON THESE
REMARK 4 RECORDS ARE MEANINGLESS.
;
5
;
REMARK 5
REMARK 5 THIS MODEL IS BASED UPON THE COORDINATES OF:
REMARK 5
REMARK 5 PDB ENTRY 1t9f.pdb
REMARK 5 STRUCTURAL GENOMICS, UNKNOWN FUNCTION 16-MAY-04
REMARK 5 STRUCTURAL GENOMICS OF CAENORHABDITIS ELEGANS: STRUCTURE O
REMARK 5 A PROTEIN WITH UNKNOWN FUNCTION
REMARK 5 X-RAY DIFFRACTION
REMARK 5 RESOLUTION. 2.00 ANGSTROMS.
REMARK 5
;
#
_entity_poly.entity_id 1
_entity_poly.pdbx_seq_one_letter_code
;KTGAELVTCGSVLKLLNTHHRVRLHSHDIKYSGSGQSVTGVEASDDANSYWRIRGGSE
GGCPRGSPVRCGQAVRLTHVLTGKNLHTHHFSPSPLSNNQEVSAFGEDGEGDDLTLWTVRC
SGQHWEREAARVFQHVGTSVFLSVTGGEQYGSPIRGQHEVHGMPSANTHNTWKAMEGI
;
_entity_poly.pdbx_strand_id ?
_entity_poly.type polypeptide(L)
_entity_poly.pdbx_target_identifier ?
#
_exptl.crystals_number 1
_exptl.entry_id UNNAMED
_exptl.method 'X-RAY DIFFRACTION'
#
_exptl_crystal.id 1
_exptl_crystal.pdbx_mosaicity ?
_exptl_crystal.pdbx_mosaicity_esd ?
_exptl_crystal.density_Matthews ?
_exptl_crystal.density_diffrn ?
_exptl_crystal.density_meas ?
_exptl_crystal.density_meas_temp ?
_exptl_crystal.density_percent_sol ?
_exptl_crystal.size_max ?

```

```

_exptl_crystal.size_mid      ?
_exptl_crystal.size_min     ?
_exptl_crystal.size_rad     ?
#
_refine.entry_id             UNNAMED
_refine.B_iso_mean          41.006
_refine.pdbx_method_to_determine_struct N/A
_refine.B_iso_max           99.99
_refine.B_iso_min           0.00
_refine.occupancy_max       1.00
_refine.occupancy_min       1.00
#
_reflns.entry_id            UNNAMED
#
loop_
_software.name
_software.version
_software.date
_software.type
_software.contact_author
_software.contact_author_email
_software.classification
_software.location
_software.language
_software.citation_id
REFMAC5      ?      ?      program 'Garib N. Murshudov'
garib@ysbl.york.ac.uk refinement
http://www.ccp4.ac.uk/dist/html/refmac5.html Fortran_77 1
pdb_extract 3.006 'June 11, 2008' package PDB
help@deposit.rcsb.org
'data extraction' http://sw-tools.pdb.org/apps/PDB_EXTRACT/      C++      2
#
_struct.entry_id            UNNAMED
_struct.title                SDF2-L1
#
_struct_biol.id              1
_struct_biol.details         N/A
#
_symmetry.space_group_name_H-M 'P 1'
_symmetry.entry_id           UNNAMED
#

```
